# Supplementary material for: A diagnosis model for prostate adenocarcinoma based on hub genes targeted by sulforaphane
Source: Research Square preprint supplement (doi:10.21203/rs.3.rs-7993444/v1), 2025-12-12
Supplement: Supplementary file 1 [file 132136601c10227cfcb2b6fb.xlsx]

## Sheet: DEGs up
Genes
HPN
SLC45A2
AMACR
HOXC6
ZIC2
SIM2
CGREF1
NETO2
DNAH5
PCA3
MMP26
GOLM1
COL2A1
RAB17
ATP8A2
NEK5
HOXC4
ACSM1
KCNG3
UNC5A
STX19
APOF
DLX1
TFF3
ABCC4
BICD1
CACNA1D
RRM2
TWIST1
PPP1R14B
TDRD1
TMTC4
OR51E2
ASPN
SLC43A1
GDF15
GMDS
GPR160
PKIB
BEND4
LUZP2
GCNT1
B3GAT1
GJB1
PLA2G7
SDK1
FEV
COL9A2
TRIB1
TUBB2A
PTP4A3
REPS2
ERG
COMP
VSTM2L
CYP2J2
MIPEP
TMC5
SAMD5
THBS4
KCNH8
SFRP4
SLC38A11
TOP2A
MYO6
PPM1E
TMEM45B
INSM1
TOX3
F5
COL28A1
CXCL14
SERPINA3
CRISP3
TGM3

## Sheet: DEGs down
Genes
ABCG2
GSTM3
AOX1
AFAP1L2
NYNRIN
CAV1
NDRG2
DUOX1
GATA3
PHYHIPL
CHRDL1
CYP3A5
COL4A6
MCC
SLC18A2
FOXQ1
PPARGC1A
ID4
GJA1
EFEMP1
MYOF
DUOXA1
CYP4B1
MYOCD
HOXD13
AVPI1
MEIS2
SLC16A5
PARM1
EFHD1
SLC47A1
SNAI2
KRT16
CAPG
ACTC1
LRP4
COL17A1
SRD5A2
VSNL1
ROR2
SLC14A1
FBXO17
SERPINB5
PENK
SPATA6
PRDM8
CPA6
WIF1
TP63
TCEAL2
ARMCX1
EFS
KANK4
LAMB3
SMOC1
DSC3
SCGB1A1
CRYAB
ID1
NTN4
SLC2A5
ITGB4
LSAMP
SCGB2A1
TRIM29
KCNJ3
FGFR2
KRT5
FADS2
FLRT3
UPK1A
KRT23
GSTM1
S1PR5
DMKN
GSTM2
CARTPT
ABO
CCK
OLFM4
PROM1
CXCL17
TGM4
BCL11A
CD38
DPT
KRT15
KRT14
MME
CD177
DAPL1
DEFB1
S100A2
GABRP
GPR87
COL9A1
DPYS
MSMB
ODAM
BEX1
NEFH
PROK1
SERPINB11
