# Supplementary material for: A diagnosis model for prostate adenocarcinoma based on hub genes targeted by sulforaphane
Source: Research Square preprint supplement (doi:10.21203/rs.3.rs-7993444/v1), 2025-12-12
Supplement: Supplementary file 2 [file 1ed652eb5b4a6b7430da972d.xlsx]

## Sheet: Sheet2
SFNRGs
CDKN1C
CDKN2AIP
CDKN2AIPNL
CEBPD
CEBPE
CENPJ
CEP20
CEP55
CEP70
CES1
CES3
CFAP251
CFP
CHN1
CHORDC1
CHRNB1
CHST13
CHST15
CHST2
CILP2
CITED2
CITED4
CKB
CKS2
CLCN4
CLDN7
CLEC2B
CLEC4D
CLEC4E
CLGN
CLIC3
CNFN
CNGB1
CNIH2
CNN3
CNTNAP1
CNTNAP3
COA6
COBLL1
COL1A1
COL4A5
COL4A6
COL5A1
COL9A3
COMT
CORO6
CPA4
CPD
CPEB2
CPEB4
CPED1
CPLANE1
CPM
CPS1
CR1L
CRABP2
CRACDL
CRB3
CREB5
CREG1
CRIP2
CRISPLD2
CRTC3
CRYAB
CRYZ
CSDC2
CSF2
CSPG4
CSRP1
CTNND1
CTSG
CTSL
CTSO
CTXN1
CUL3
CXCL1
CXCL2
CXCL8
CXCR5
CYBB
CYP1A1
CYP1A2
CYP1B1
CYP2A6
CYP39A1
CYP3A4
CYP4F11
CYP4F2
CYP4F3
CYP7A1
CYP8B1
DAB2
DAPP1
DCN
DDAH2
DDB2
DDIAS
DDIT3
DDN
DENND2B
DENND3
DEPDC1
DEPTOR
DES
DGAT1
DGCR8
DHRS11
DIO2
DKK1
DKK3
DLG3
DLGAP5
DLK2
DLX3
DLX4
DMAC2L
DNAJB13
DNAJB4
DNM1L
DNMT1
DNMT3A
DNMT3B
DNTTIP2
DOCK4
DOCK8
DOK7
DPYD
DRAM1
DUSP10
DUSP16
DUSP4
DUSP5
DUSP5P1
DUSP6
DUSP8
DUSP9
DYNC2I2
E2F1
E2F3
EDNRA
EEF2K
EFHD1
EFNA1
EFNB2
EFR3B
EHF
EID3
EIF2AK3
EIF2S1
EIF4E3
EIF5
EIF5A
EIF5A2
ELF3
ELFN2
ELL2
ELOVL6
EMP2
EMP3
ENC1
ENDOG
ENO3
ENPP2
ENTPD2
ENTREP1
EP300
EPB41L1
EPB41L4A
EPDR1
EPGN
EPHA7
EPHX1
ERCC4
ERCC5
ERG
ESPN
ESR1
ETNK2
ETNPPL
ETS2
ETV4
ETV5
F11R
F12
F13A1
F3
FA2H
FAAH2
FABP3
FAM161A
FAM167B
FAM43A
FAM72A
FAM72B
FAM83A
FARP1
FAS
FASLG
FASN
FBN2
FBXO2
FBXO32
FBXO4
FCAR
FCMR
FECH
FFAR2
FGF1
FGFBP1
FGFR3
FHL1
FHL2
FIS1
FLVCR2
FOLR1
FOSL1
FOXC2
FOXQ1
FPR1
FPR2
FRAS1
FTH1
FTH1P2
FTH1P3
FTL
FZD7
G3BP2
G6PD
GAB2
GABARAPL1
GABPB2
GADD45A
GALNTL6
GARS1
GAS1
GAS7
GATM
GCHFR
GCLC
GCLM
GCNT3
GDF11
GDPD5
GIPC3
GJA5
GLA
GLO1
GLRX
GMDS
GNPDA1
GPAT3
GPC1
GPC5
GPER1
GPLD1
GPM6B
GPR135
GPR137C
GPR153
GPR3
GPR37L1
GPR65
GPR84
GPR85
GPRC5A
GPRC5B
GPRIN2
GPSM3
GPX1
GPX4
GRAMD2B
GRB10
GSN
GSR
GSTA1
GSTM1
GSTP1
GSTT1
GXYLT2
H1-0
H2AC1
HCK
HDAC1
HDAC11
HDAC2
HDAC3
HDAC5
HDAC6
HDAC9
HECW1
HERC5
HERC6
HES2
HHEX
HIC2
HIF1A
HIVEP3
HKDC1
HLA-B
HLA-C
HLA-DMA
HLA-DPA1
HLA-DPB1
HLA-DRA
HLA-DRB4
HLA-DRB5
HLA-G
HMG1
HMGA2
HMMR
HMOX1
HNRNPC
HNRNPF
HNRNPH1
HNRNPK
HOGA1
HOXC4
HOXC6
HP
HPGD
HPGDS
HPR
HPSE
HR
HSD11B1
HSF1
HSP90AA1
HSPA13
HSPA1B
HSPA1L
HSPA2
HSPA4
HSPA9
HSPB3
HSPB7
HSPD1
HSPH1
ICAM1
ICAM2
ICAM3
ID2
ID3
IFI30
IFI44
IFIH1
IFIT1
IFIT2
IFIT3
IFITM2
IFITM3
IL1R1
IGF2R
IGFN1
IGKV2D-29
IGLL1
IKBKG
IKZF2
IL11
IL12B
IL18R1
IL18RAP
IL1B
IL32
IL4R
IL6
INA
INAVA
INHA
INHBB
INPP1
INPP5J
INS
INSL4
IPCEF1
IRF7
IRF8
ISG20
ITGA2
ITGA6
ITGAM
ITGAX
ITGB2
ITGB7
ITPRIP
JHY
JPH2
JUND
JUP
KAT2B
KCNA3
KCNAB2
KCND1
KCNH5
KCNIP3
KCNJ14
KCNJ2
KCNJ8
KCNK15
KCNQ1
KCNQ3
KCTD12
KEAP1
KIAA0319
KIAA0513
KIAA0825
KIF13A
KIF14
KIF18A
KLF10
KLF4
KLF7
KLHL13
KLHL21
KLHL29
KLK3
KMT5C
KNSTRN
KRCC1
KRT17
KRT18P49
KRT4
KRT7
KRT8
KRT80
KRT86
KYNU
L3HYPDH
LAMA1
LAMB3
LAMP2
LAMP5
LANCL3
LDHD
LFNG
LGALS1
LGALS12
LGSN
LHX2
LILRB4
LIMA1
LITAF
LMO1
LMO4
LPCAT2
LRG1
LRIG1
LRP10
LRP12
LRP8
LRRC14B
LRRC20
LRRC45
LRRC73
LSP1
LSS
LST1
LUM
LXN
LYPD6
LYSMD2
MAF
MAFG
MAGEB2
MAGI3
MAMDC2
MAMDC4
MAP1B
MAP1LC3B
MAP2
MAP2K4
MAP2K6
MAP3K12
MAP3K8
MAPK1
MAPK3
MFAP2
MAPK4
MAPK8
MAPK9
MAPRE3
MARCKS
MARCOL
MATCAP1
MB
MFAP4
MBD2
MBD3
MCCC1
MCEE
MCOLN2
MCTP1
MCTP2
ME1
MEGF9
MEOX1
MGAM
MGAT5
MGLL
MGMT
MIA2
MICAL2
MINDY1
MLXIPL
MMP2
MMP28
MMRN2
MNDA
MNS1
MOB3B
MOXD1
MPEG1
MPHOSPH6
MPND
MPP2
MPP7
MPZL1
MPZL2
MPZL3
MRO
MRPL53
MRPS24
MS4A6A
MSC
MSRB1
MT1E
MT1G
MTMR10
MTMR11
MUC1
MUC19
MUC3A
MVK
MVP
MXD1
MXD4
MYB
MYEOV
MYLK
MYLK3
MYO1G
MYOCD
MYPN
MYRIP
MYT1L
NAT14
NCAM2
NCCRP1
NCF1
NCF2
NCOR2
ND1
NDRG1
NDRG3
NEBL
NECAB2
NEIL1
NEIL3
NEK2
NES
NEUROG3
NFE2L2
NFKB1
NFKBIA
NFKBIB
NFKBIE
NFKBIZ
NGF
NGFR
NHSL1
NIPSNAP3A
NLRC5
NME1
NME2P1
NMNAT1
NOG
NOTCH1
NOTCH3
NOTUM
NPC1
NPR2
NPTX1
NPY4R
NQO1
NQO2
NR1D2
NR1I2
NR3C1
NR4A3
NREP
NRF1
NRG1
NRXN3
NT5DC3
NTRK1
NTRK2
NUAK1
NUDT7
NXNL2
NYAP2
OGA
OLFM4
OLFML1
OLFML2A
OLFML2B
OLR1
OPLAH
OPN3
OR2H2
OR2T4
OSBP2
OSBPL6
OSBPL7
OSGIN1
OSGIN2
OSTM1
OTUD7A
OTULINL
P2RX3
P2RY11
P2RY2
P2RY6
P4HB
PACC1
PADI4
PAFAH1B3
PALM
PALMD
PANX2
PAOX
PAPSS1
PARP1
PBX1
PC
PCBP4
PCDH10
PCED1B
PCK2
PCLAF
PCNA
PCOLCE
PCSK1
PDE1A
PDE3A
PDE4B
PDE5A
PDE7B
PDE8B
PDE9A
PDGFB
PDGFC
PDGFRB
PDLIM1
PDZD2
PDZK1IP1
PEG10
PELI1
PGD
PGM5
PHACTR2
PHGDH
PHKA1
PHPT1
PHYHIP
PIK3CD
PIK3R3
PILRA
PINK1
PIP5K1B
PIR
PITX1
PITX3
PKDCC
PKIG
PLA2R1
PLAAT2
PLAC8
PLAC8L1
PLAT
PLAU
PLCE1
PLCH2
PLCL1
PLD1
PLD4
PLD6
PLK1
PLK3
PLPP1
PLXDC2
PNCK
POPDC3
POR
PPARG
PPARGC1A
PPIF
PPP1R3C
PPP2R2B
PRDM1
PRDX1
PRDX3
PRG2
PRICKLE1
PRKAG2
PRKCA
PRKCB
PRLR
PROM2
PRPH
PRR5L
PRRG4
PRRX2
PRSS56
PRTN3
PSAT1
PSMB6
PSMB8
PTER
PTGR1
PTGS1
PTK2B
PTPN12
PTPN22
PTTG1
PTX3
PXYLP1
QPCT
QRICH2
RAB10
RAB20
RAB26
RAB42
RAB8B
RAP1GAP
RASGRP3
RASL11A
RASSF2
RASSF5
RB1
RBBP4
RBM47
RBMS3
RCAN2
RCOR2
RDH10
REEP4
REEP6
RHEBL1
REL
RELA
RERG
RETN
RFLNB
RGL1
RGS2
RHBDF2
RHBDL1
RHOB
RHOF
RHOU
RHOV
RHPN1
RIGI
RILPL1
RINL
RIT1
RNA5SP366
RNA5SP63
RNA5SP74
RNF112
RNF144B
RNF150
RNF182
RNU5D-1
RNU5E-4P
RNY3P2
RNY4P5
ROGDI
RORC
RPL7A
RPRM
RPS6
RPSA
RSPO3
RTL10
RTL8B
RTN2
RXFP1
RYR2
S100A4
S100A8
S100A9
SAA1
SALL4
SAMD11
SAMD4A
SAPCD2
SARS2
SAT1
SATB1
SCD
SCN1A
SCNN1A
SDC2
SDCBP
SIGLEC6
SIGLEC9
SDK2
SDR16C5
SEL1L3
SELENBP1
SELENOH
SELENOM
SELENOP
SEMA3B
SEMA3C
SEMA7A
SEPTIN3
SEPTIN6
SERINC5
SERPINE2
SERPING1
SFN
SGK1
SGMS2
SGO2
SH2D5
SH3PXD2A
SH3RF3
SH3TC2
SIGLEC10
SIGLEC5
SIPA1L1
SIRPD
SIRT1
SKA2
SKIL
SLAMF6
SLC10A1
SLC12A3
SLC12A7
SLC12A8
SLC13A1
SLC16A14
SLC16A4
SLC1A3
SLC1A5
SLC20A1
SLC22A23
SLC25A29
SLC26A2
SLC28A3
SLC2A3
SLC2A5
SLC35G2
SLC38A3
SLC38A6
SLC39A2
SLC3A2
SLC47A1
SLC48A1
SLC4A8
SLC51A
SLC6A6
SLC7A11
SLCO2A1
SLCO3A1
SLCO4C1
SLF1
SMOX
SMPDL3B
SNAI2
SNAP25
SNCG
SNORA2A
SNORA3A
SNORD116-13
SNORD116-2
SNORD1B
SOD1
SORBS2
SORCS2
SORL1
SOX15
SOX4
SOX9
SPACA6
SPART-AS1
SPATA17
SPINK13
SPINT1
SPON2
SPP1
SPRED1
SPRED2
SPRED3
SPRY4
SPSB1
SPTLC3
SQSTM1
SRD5A3
SREBF1
SRGAP3
SRGN
SRXN1
SSBP2
STAC2
STAMBPL1
STARD10
STAT3
STEAP1
STEAP4
STK17A
STON1
STOX2
SUCNR1
SULF2
SV2B
SWT1
SYNGR1
SYNGR3
SYNPO
SYT12
SYT7
TAGLN2
TALDO1
TANC2
TAP1
TASL
TBC1D30
ABCA7
A2M
AATK
ABCB1
ABCB10
TBCB
TBX1
TBX15
TBXA2R
TCEAL3
TCF19
TCF7L1
ABCB6
ABCC2
ABCC3
ABCG5
TCIM
TCP11L1
TEAD2
TENT5B
TERT
TFAM
TFE3
ABHD3
ABHD4
ABLIM2
ABLIM3
ACBD4
ACOT4
ACSF2
ACSL1
ACSM3
ACTA2
TGFB3
TGFBR1
TGM1
ACTB
ACTC1
ADA
ADAM17
ADAM21
ADAM22
THAP1
THEMIS2
TIMP1
TIMP2
TIMP4
TJP3
ADAM33
ADAMTS15
ADAMTS5
ADAMTS6
ADAMTSL4
ADGRA2
ADGRD1
ADGRE4P
ADGRE5
ADGRG1
ADGRG3
ADGRL1
ADIRF
ADM
TLL1
TLR4
TLR6
TM6SF1
TMBIM1
TMC5
TMCC2
TMEM107
ADORA2A
ADORA2B
ADORA3
ADRB1
AGFG2
ALCAM
TMEM116
TMEM121
TMEM156
TMEM178B
TMEM192
TMEM25
TMEM37
ALDH1A1
ALDH1A3
ALDH1L2
ALPI
ALPP
TMEM71
TMEM80
TMEM87B
TMOD1
TMOD2
TMPRSS3
TMT1A
TNC
TNF
AHR
AIFM1
AK6
AK9
AKAP5
AKIRIN2
AKR1B10
AKR1C1
AKR1C2
AKR1C3
AKT1
TNFAIP2
TNFAIP3
TNFRSF10A
TNFRSF10B
TNFRSF10D
ALDH2
ALDH3A2
ALDH4A1
ALG10B
ALOX5AP
ALPG
AMH
AMOTL1
ANGPTL4
ANK2
ANKH
TNFRSF21
TNFRSF9
TNFSF10
TNFSF14
TNNT2
TOP6BL
TOX
ANKHD1
ANKRD2
ANKRD20A11P
ANKRD22
ANO2
ANO9
ANTKMT
ANTXR2
ANXA1
TP53
TP53I11
TP73
TPM1
TRAFD1
TREM1
TREML2
ANXA8
ANXA8L1
AOC2
APBB1IP
APCDD1
APLP1
APOBEC3B
APOL1
TRE-TTC9-1
TRG-CCC6-1
TRIB3
TRIM16
TRIM16L
TRIM22
TRIM29
TRIM5
TRIM54
AQP3
AR
ARG2
ARHGAP20
ARHGAP26
ARHGAP28
ARHGDIB
ARHGEF39
ARHGEF9
ARID3A
ARID5B
ARSJ
TRPS1
TRY-GTA11-1
TSHZ2
ASB9
ASF1A
ASNS
ASPH
ASS1
ASS1P11
TSPAN14
TSPOAP1
TTC7A
TTK
TTPA
TUBA1A
TUBA3D
ATOH8
ATP13A2
ATP1A3
ATP2B4
ATP5F1B
ATXN10
AURKA
B3GALT4
B3GNT5
B4GALNT1
B4GALT1
BACH1
BAD
BAG1
BAG3
TUBA4A
TUBB1
TUBB4A
TUBB4B
TVP23A
BATF3
BAX
TXN
TXNRD1
BBC3
BCAM
BCL2
TYROBP
BCL2A1
BCL2L1
BCL3
BCL6
BDKRB2
BDNF
UBE2S
UGDH
UGT1A1
UNKL
BHLHE40
BID
BIN2
BIN2P1
BIRC3
UPK3B
UPP1
USH1C
USP2
BMF
BMP2
BORA
BRINP3
BRSK2
BST1
BTG2
BTN3A3
USP43
VASH2
VCAM1
VCP
VEGFA
BUB1
C11ORF86
C1ORF115
C1ORF198
C1ORF53
C1QL1
C1QTNF1
C1QTNF6
C1R
C22ORF39
C2ORF15
C3
C3AR1
C4BPA
C6ORF132
CAB39L
CABYR
CACNB1
CADPS2
VGLL3
VIM
VIPR2
VIT
VSIR
CAMK1D
CAMK2N1
CAPG
CAPNS1
CARD19
CARHSP1
CARS1
VTN
VWA5A
VWA7
WDR44
WDR54
WDR76
WNT6
XAF1
CASP3
XAGE2
XBP1
XIAP
XPOT
YJEFN3
YPEL3
YWHAB
YWHAE
CASP4
CASP8
YWHAQ
ZBED10P
ZBTB18
ZDHHC11
ZDHHC3
ZEB1
ZEB2
CASP9
CASTOR3P
CASZ1
CBLB
CBR3
ZFAND2A
ZFP92
CBX6
CCDC102A
CCDC18
CCDC28B
CCDC3
CCDC80
ZMYND12
ZNF20
ZNF275
ZNF28
ZNF33B
ZNF429
ZNF462
ZNF521
ZNF608
ZNF746
ZNF831
CCL2
CCL20
ZP3
CCN5
CCNB1
CCNB2
CCND1
CCND3
CCNE2
CCNJL
CCPG1
CCR2
CCR4
CCT2
CD14
CD180
CD22
CD24
CD300LF
CD58
CD68
CD70
CD74
CD82
CD83
CD84
CDA
CDC20
CDC42BPG
CDH1
CDH10
CDH5
CDK1
CDK18
CDKN1A
Inactive rhomboid protein 2 (RHBDF2)
PIK3CG
EGFR
MIF
NOS2
TRPA1
TGM2
TLR9
GRM5
SLC6A2
SLC6A3
MTNR1A
MTNR1B
CCR1
MCL1
ALOX5
MAP2K1
SLC6A4
CYP19A1
CTSK
GRM4
MAOB
CA9
CYP11B1
CYP11B2
PTPRC
SRC
MME
CDC7
MAOA
AKR1B1
OPRM1
OPRD1
GSK3B
ACHE
NAMPT
CTSS
CDC25B
P2RX7
DUSP1
IDH1
NAAA
TDP2
AKR1A1
CES2
MPO
S1PR2
SIRT2
ESR2
CYP2C19
TYMP
CHRM1
MAPK14
TTR
KDM4C
PDE10A
CDK2
STS
MALT1
FAAH
TOP2A
PREP
FAP
NOS3
TAAR1
ELANE
PARP2
DHODH
CCNA1
CCNA2
ADORA1
CCNC
CDK8
ALDH3A1
METAP1
PDE3B
FLT3
KDR
JAK1
ALOX15
JAK2
TYK2
HRH4
