# Supplementary material for: A diagnosis model for prostate adenocarcinoma based on hub genes targeted by sulforaphane
Source: Research Square preprint supplement (doi:10.21203/rs.3.rs-7993444/v1), 2025-12-12
Supplement: Supplementary file 3 [file 2525c2450303104196a84ce4.xlsx]

## Sheet: Table S5
genes	logFC	AveExpr	t	P.Value	adj.P.Val	B	gene_symbol	group
VSNL1	-2.07611	5.95327	-16.7346	4.8e-36	7.15e-32	71.2283	VSNL1	down
TRIM29	-1.94502	5.85211	-16.4128	3.16e-35	2.35e-31	69.3801	TRIM29	down
DMKN	-1.29506	5.44997	-16.297	6.23e-35	3.03e-31	68.7123	DMKN	down
SLC14A1	-2.89896	7.97783	-16.2518	8.13e-35	3.03e-31	68.4512	SLC14A1	down
TP63	-1.90979	6.47238	-16.1697	1.32e-34	3.92e-31	67.9769	TP63	down
HPN	1.7405	7.03443	16.1181	1.79e-34	4.43e-31	67.6781	HPN	up
LAMB3	-2.43579	6.46654	-16.0283	3.04e-34	6.46e-31	67.1572	LAMB3	down
COL4A6	-1.23408	5.5182	-15.3361	1.85e-32	3.45e-29	63.1163	COL4A6	down
NAV2	-0.739892	6.25784	-15.1535	5.53e-32	9.15e-29	62.0427	NAV2	no
PCA3	3.929	7.57205	14.9244	2.19e-31	3.26e-28	60.6911	PCA3	up
AMACR	2.84509	7.73318	14.8085	4.39e-31	5.94e-28	60.006	AMACR	up
DUOX1	-1.59908	6.58084	-14.7061	8.13e-31	1.01e-27	59.3991	DUOX1	down
GJB1	1.56901	6.48986	14.6414	1.2e-30	1.38e-27	59.0156	GJB1	up
ROR2	-1.35445	7.17297	-14.5874	1.66e-30	1.77e-27	58.6951	ROR2	down
CYP3A5	-2.29556	7.77107	-14.1837	1.91e-29	1.9e-26	56.2916	CYP3A5	down
SYNGR1	-0.999515	7.35733	-14.0584	4.1e-29	3.81e-26	55.5434	SYNGR1	no
KRT23	-2.22737	5.77341	-13.8446	1.5e-28	1.32e-25	54.2638	KRT23	down
NDRG2	-1.10465	8.34822	-13.7575	2.56e-28	2.11e-25	53.7417	NDRG2	down
COL17A1	-1.6641	5.76496	-13.734	2.95e-28	2.31e-25	53.601	COL17A1	down
CPA6	-1.39847	5.32817	-13.6579	4.69e-28	3.49e-25	53.1442	CPA6	down
RAB17	1.73715	7.85689	13.3187	3.72e-27	2.56e-24	51.1051	RAB17	up
EPCAM	0.960302	9.7446	13.3163	3.78e-27	2.56e-24	51.0908	EPCAM	no
DUOXA1	-1.82989	6.81529	-13.1491	1.05e-26	6.8e-24	50.0833	DUOXA1	down
PRDM8	-1.4394	8.22222	-13.1379	1.13e-26	6.98e-24	50.0158	PRDM8	down
PPP1R14B	1.05965	8.2623	13.064	1.77e-26	1.05e-23	49.5701	PPP1R14B	up
FLRT3	-1.60131	6.54794	-13.0578	1.84e-26	1.05e-23	49.5329	FLRT3	down
KRT5	-2.76906	8.3494	-13.051	1.92e-26	1.06e-23	49.4916	KRT5	down
TMTC4	1.13746	6.35625	12.9676	3.19e-26	1.7e-23	48.9885	TMTC4	up
FGFR2	-1.18764	5.87221	-12.8696	5.82e-26	2.99e-23	48.3969	FGFR2	down
MYOF	-1.21716	7.86688	-12.8389	7.03e-26	3.49e-23	48.2116	MYOF	down
SLC2A5	-1.52147	5.46429	-12.7918	9.39e-26	4.51e-23	47.927	SLC2A5	down
LUZP2	2.78116	8.58112	12.7705	1.07e-25	4.9e-23	47.7983	LUZP2	up
CAV2	-0.98621	6.72038	-12.768	1.09e-25	4.9e-23	47.7837	CAV2	no
SIM2	2.13864	7.87758	12.5365	4.5e-25	1.97e-22	46.384	SIM2	up
CD177	-3.01432	6.48878	-12.4557	7.39e-25	3.07e-22	45.8953	CD177	down
ZNF483	-0.833451	6.55587	-12.4548	7.42e-25	3.07e-22	45.8904	ZNF483	no
AOX1	-1.42622	5.45727	-12.4455	7.86e-25	3.16e-22	45.8337	AOX1	down
EZH2	0.902809	5.74919	12.3993	1.04e-24	4.09e-22	45.5543	EZH2	no
KRT15	-2.80196	8.60556	-12.3809	1.17e-24	4.46e-22	45.443	KRT15	down
NEK5	1.68451	6.60683	12.2989	1.93e-24	7.2e-22	44.947	NEK5	up
ABCC4	1.36183	8.79194	12.1942	3.68e-24	1.34e-21	44.3131	ABCC4	up
NME1	0.795295	8.22942	12.1726	4.2e-24	1.49e-21	44.1827	NME1	no
SNAI2	-1.34852	8.62504	-12.1547	4.69e-24	1.62e-21	44.0744	SNAI2	down
CSTA	-2.02347	7.19769	-12.1453	4.97e-24	1.68e-21	44.0172	CSTA	down
ID4	-1.37904	6.82633	-12.1092	6.21e-24	2.05e-21	43.799	ID4	down
SPATA6	-1.19697	7.01692	-12.0785	7.5e-24	2.43e-21	43.613	SPATA6	down
MEIS2	-1.39265	8.46641	-11.9994	1.22e-23	3.86e-21	43.1343	MEIS2	down
NYNRIN	-1.1668	6.67143	-11.9735	1.43e-23	4.43e-21	42.9778	NYNRIN	down
STOX2	-0.898659	8.67881	-11.9319	1.85e-23	5.61e-21	42.7257	STOX2	no
CGREF1	1.72341	6.41882	11.894	2.33e-23	6.93e-21	42.4967	CGREF1	up
TRIM36	0.976214	8.02515	11.8486	3.08e-23	8.99e-21	42.2216	TRIM36	no
RAP1GAP	0.774912	9.58869	11.8197	3.68e-23	1.05e-20	42.0469	RAP1GAP	no
SERPINB5	-1.59363	5.68447	-11.7435	5.87e-23	1.64e-20	41.5858	SERPINB5	down
PDPN	-0.875564	7.47403	-11.7414	5.95e-23	1.64e-20	41.5728	PDPN	no
BCL11A	-1.58925	7.13602	-11.7152	6.99e-23	1.89e-20	41.4146	BCL11A	down
CYP4B1	-1.78377	5.65261	-11.6742	8.99e-23	2.33e-20	41.1664	CYP4B1	down
SLC16A5	-1.2874	6.55844	-11.6742	8.99e-23	2.33e-20	41.1663	SLC16A5	down
FBXO17	-1.11525	5.82571	-11.6725	9.08e-23	2.33e-20	41.1562	FBXO17	down
AVPI1	-1.13329	8.82002	-11.5746	1.66e-22	4.18e-20	40.564	AVPI1	down
NBL1	-1.16025	10.2013	-11.5696	1.71e-22	4.24e-20	40.5339	NBL1	down
PPARGC1A	-1.53343	6.28835	-11.5362	2.1e-22	5.12e-20	40.3315	PPARGC1A	down
MPZL2	-0.994394	8.49589	-11.4035	4.74e-22	1.14e-19	39.5293	MPZL2	no
DNAH5	1.84594	7.28447	11.3868	5.25e-22	1.24e-19	39.4285	DNAH5	up
DSC3	-1.63618	6.93305	-11.3844	5.32e-22	1.24e-19	39.4144	DSC3	down
UPK1A	-1.76271	7.36297	-11.3641	6.03e-22	1.37e-19	39.2917	UPK1A	down
S100A16	-0.901676	6.57428	-11.3635	6.05e-22	1.37e-19	39.2876	S100A16	no
CRYAB	-1.39708	8.89477	-11.3546	6.39e-22	1.42e-19	39.234	CRYAB	down
JAG2	-1.02266	6.81936	-11.3439	6.82e-22	1.49e-19	39.1696	JAG2	down
STX19	1.26931	9.84594	11.3162	8.09e-22	1.75e-19	39.0022	STX19	up
DLX1	2.04423	5.69308	11.3112	8.34e-22	1.77e-19	38.9716	DLX1	up
ITGB4	-1.02993	6.97916	-11.3063	8.6e-22	1.8e-19	38.9423	ITGB4	down
GPRC5B	-0.645081	5.68651	-11.2946	9.23e-22	1.91e-19	38.8717	GPRC5B	no
GOLM1	1.28119	9.04262	11.2617	1.13e-21	2.3e-19	38.673	GOLM1	up
KANK4	-1.3469	6.66585	-11.2473	1.23e-21	2.48e-19	38.5857	KANK4	down
HOXC6	1.83287	6.14345	11.2443	1.26e-21	2.5e-19	38.5676	HOXC6	up
FOXQ1	-1.97416	7.83985	-11.2067	1.58e-21	3.1e-19	38.3409	FOXQ1	down
UAP1	1.155	8.20007	11.2002	1.65e-21	3.19e-19	38.3016	UAP1	up
NTNG2	-2.08558	8.39761	-11.1972	1.68e-21	3.2e-19	38.2833	NTNG2	down
LRP4	-1.21071	6.92895	-11.1746	1.93e-21	3.62e-19	38.147	LRP4	down
DST	-0.77593	7.02148	-11.1731	1.95e-21	3.62e-19	38.1378	DST	no
EFEMP1	-1.21398	8.31292	-11.1174	2.74e-21	4.99e-19	37.802	EFEMP1	down
TCEAL2	-1.67248	8.8318	-11.1167	2.75e-21	4.99e-19	37.7978	TCEAL2	down
EFS	-1.49391	7.86823	-11.0697	3.66e-21	6.57e-19	37.5142	EFS	down
PARM1	-1.24198	8.68994	-11.0267	4.77e-21	8.45e-19	37.255	PARM1	down
GSTM2	-1.55002	9.18059	-10.9548	7.4e-21	1.3e-18	36.8216	GSTM2	down
GJA1	-1.24663	9.23461	-10.8863	1.13e-20	1.95e-18	36.4087	GJA1	down
DLK2	-0.898088	5.23664	-10.8734	1.22e-20	2.08e-18	36.331	DLK2	no
ALDH3A2	-0.798169	8.47582	-10.8627	1.3e-20	2.2e-18	36.2666	ALDH3A2	no
REPS2	1.14246	8.63135	10.7288	2.95e-20	4.93e-18	35.461	REPS2	up
KRT14	-1.85129	8.18285	-10.7127	3.25e-20	5.38e-18	35.3643	KRT14	down
PCDH7	-0.861301	5.67318	-10.6852	3.85e-20	6.29e-18	35.199	PCDH7	no
GCNT1	1.65045	10.1702	10.6808	3.95e-20	6.39e-18	35.1727	GCNT1	up
NR3C1	-0.783936	7.24672	-10.6374	5.15e-20	8.24e-18	34.912	NR3C1	no
HOXD13	-1.36844	5.90772	-10.6326	5.3e-20	8.39e-18	34.8835	HOXD13	down
MME	-2.10631	7.70914	-10.6307	5.36e-20	8.4e-18	34.872	MME	down
AFAP1L2	-1.29662	6.87038	-10.5483	8.86e-20	1.37e-17	34.3775	AFAP1L2	down
RND2	-0.724598	8.06004	-10.4844	1.31e-19	2.01e-17	33.9941	RND2	no
PAICS	0.685056	7.4463	10.4814	1.33e-19	2.02e-17	33.9762	PAICS	no
PHYHIPL	-1.42392	5.71869	-10.4761	1.37e-19	2.07e-17	33.9445	PHYHIPL	down
TMLHE	-0.549201	5.30025	-10.4485	1.63e-19	2.42e-17	33.7789	TMLHE	no
BICD1	1.16633	6.00776	10.4444	1.67e-19	2.46e-17	33.7541	BICD1	up
MET	-0.844683	6.22701	-10.4127	2.02e-19	2.95e-17	33.5642	MET	no
MCC	-1.158	6.54681	-10.402	2.16e-19	3.12e-17	33.5002	MCC	down
PLEKHH2	-0.725477	6.35964	-10.398	2.21e-19	3.17e-17	33.4763	PLEKHH2	no
APOBEC3C	-0.847227	6.98905	-10.3434	3.08e-19	4.37e-17	33.1499	APOBEC3C	no
CIB2	-0.861209	7.21155	-10.3397	3.15e-19	4.42e-17	33.1278	CIB2	no
TGM3	2.07326	6.5825	10.3386	3.17e-19	4.42e-17	33.1208	TGM3	up
ECT2	0.978132	7.29516	10.3345	3.25e-19	4.49e-17	33.0964	ECT2	no
BCL2	-0.837142	6.5761	-10.3227	3.5e-19	4.78e-17	33.0257	BCL2	no
BEND4	1.24627	7.51772	10.2712	4.78e-19	6.47e-17	32.7177	BEND4	up
GMDS	1.25693	8.58723	10.2652	4.95e-19	6.64e-17	32.6823	GMDS	up
MIR205	-1.43355	5.06721	-10.264	4.99e-19	6.64e-17	32.6749	MIR205	down
KANK1	-0.677979	7.10284	-10.2152	6.71e-19	8.84e-17	32.3835	KANK1	no
NETO2	1.40117	5.93888	10.1663	9.03e-19	1.17e-16	32.0915	NETO2	up
TRIP6	-0.954372	8.1596	-10.1654	9.07e-19	1.17e-16	32.0865	TRIP6	no
GSTM1	-1.54282	8.19799	-10.1631	9.2e-19	1.18e-16	32.0725	GSTM1	down
VSTM2L	1.46045	6.24484	10.152	9.84e-19	1.25e-16	32.0067	VSTM2L	up
TSPAN13	0.990436	10.166	10.1456	1.02e-18	1.27e-16	31.968	TSPAN13	no
ELL3	0.952258	6.36688	10.1454	1.02e-18	1.27e-16	31.9673	ELL3	no
TRPM4	0.936529	10.7535	10.1452	1.03e-18	1.27e-16	31.966	TRPM4	no
TSPAN18	-0.843123	7.00124	-10.0917	1.42e-18	1.75e-16	31.647	TSPAN18	no
SMOC1	-1.18603	6.3031	-10.0866	1.46e-18	1.79e-16	31.6166	SMOC1	down
MYOCD	-1.0223	7.0359	-10.0844	1.48e-18	1.79e-16	31.6034	MYOCD	down
NCAPG	0.884937	5.64009	10.0378	1.96e-18	2.36e-16	31.3262	NCAPG	no
ST5	-0.717789	7.74219	-10.0037	2.41e-18	2.88e-16	31.123	ST5	no
SVIL	-0.606527	7.86041	-9.98331	2.73e-18	3.23e-16	31.0018	SVIL	no
WIF1	-1.86012	5.70005	-9.97952	2.79e-18	3.28e-16	30.9793	WIF1	down
HSPB6	-0.947284	10.9339	-9.97391	2.89e-18	3.36e-16	30.9459	HSPB6	no
ACOT11	-0.796066	6.52588	-9.96846	2.99e-18	3.45e-16	30.9135	ACOT11	no
GGA2	-0.561757	9.90263	-9.94881	3.36e-18	3.85e-16	30.7967	GGA2	no
GSTM3	-1.00716	8.95299	-9.88747	4.87e-18	5.54e-16	30.4324	GSTM3	down
LARGE	-0.574243	8.80665	-9.85973	5.76e-18	6.49e-16	30.2678	LARGE	no
PIK3R1	-0.679162	7.77804	-9.80185	8.16e-18	9.08e-16	29.9247	PIK3R1	no
B3GAT1	1.46595	6.41232	9.80156	8.17e-18	9.08e-16	29.923	B3GAT1	up
FADS2	-1.49384	6.65964	-9.7975	8.38e-18	9.24e-16	29.8989	FADS2	down
HSPA4L	-0.787635	5.56274	-9.79581	8.46e-18	9.26e-16	29.8889	HSPA4L	no
MTHFD2	0.86822	8.45822	9.76464	1.02e-17	1.11e-15	29.7043	MTHFD2	no
SMPDL3B	0.768421	5.02795	9.76092	1.04e-17	1.13e-15	29.6823	SMPDL3B	no
HOXD10	-1.0819	5.38067	-9.7559	1.08e-17	1.15e-15	29.6526	HOXD10	down
THBS4	1.61602	7.0991	9.7457	1.14e-17	1.22e-15	29.5923	THBS4	up
FZD1	-0.681907	7.86371	-9.73125	1.25e-17	1.32e-15	29.5068	FZD1	no
RALGAPA2	0.768397	6.55973	9.70644	1.45e-17	1.52e-15	29.36	RALGAPA2	no
CSRNP3	-0.606071	6.86319	-9.70512	1.46e-17	1.52e-15	29.3522	CSRNP3	no
SRD5A2	-1.2088	7.36007	-9.69752	1.53e-17	1.58e-15	29.3073	SRD5A2	down
PPP1R9A	1.06114	6.54774	9.68287	1.67e-17	1.71e-15	29.2207	PPP1R9A	up
FAM83B	-0.778263	4.68374	-9.67795	1.72e-17	1.75e-15	29.1916	FAM83B	no
TSHZ3	-0.857299	8.32955	-9.66396	1.87e-17	1.89e-15	29.109	TSHZ3	no
ADD3	-1.03597	8.72431	-9.66047	1.91e-17	1.92e-15	29.0884	ADD3	down
EFHD1	-1.41284	7.25797	-9.62754	2.33e-17	2.32e-15	28.8939	EFHD1	down
PENK	-1.732	6.06036	-9.6198	2.44e-17	2.42e-15	28.8482	PENK	down
MR1	-0.796492	6.93045	-9.61406	2.52e-17	2.49e-15	28.8144	MR1	no
TUBA4A	-0.840852	9.06558	-9.60511	2.66e-17	2.61e-15	28.7616	TUBA4A	no
SLC47A1	-1.02733	7.10174	-9.59781	2.78e-17	2.71e-15	28.7185	SLC47A1	down
TRO	-0.546566	5.44581	-9.59427	2.84e-17	2.75e-15	28.6976	TRO	no
CTSB	-0.850157	9.88329	-9.59093	2.9e-17	2.78e-15	28.6779	CTSB	no
NTN4	-1.09192	9.17294	-9.58823	2.94e-17	2.8e-15	28.6621	NTN4	down
SLC45A2	1.46231	5.15638	9.58753	2.96e-17	2.8e-15	28.6579	SLC45A2	up
CCK	-1.51066	5.44498	-9.57425	3.2e-17	3.02e-15	28.5796	CCK	down
GPX3	-0.936479	11.7149	-9.57171	3.25e-17	3.04e-15	28.5646	GPX3	no
ARMCX1	-1.23012	7.68172	-9.53079	4.15e-17	3.86e-15	28.3236	ARMCX1	down
SLC43A1	1.12636	5.73659	9.5281	4.22e-17	3.9e-15	28.3077	SLC43A1	up
GDF15	1.815	8.65531	9.45311	6.61e-17	6.07e-15	27.8666	GDF15	up
NOS1	-0.874251	5.49869	-9.44053	7.12e-17	6.51e-15	27.7927	NOS1	no
ACOX2	-0.943446	6.57585	-9.43184	7.5e-17	6.81e-15	27.7416	ACOX2	no
DNAJC10	0.891276	7.36137	9.42719	7.71e-17	6.96e-15	27.7143	DNAJC10	no
MRPL17	0.755225	8.94603	9.42163	7.97e-17	7.13e-15	27.6817	MRPL17	no
TRAM2	0.634687	6.10472	9.42025	8.04e-17	7.13e-15	27.6736	TRAM2	no
YRDC	0.733265	6.04653	9.42024	8.04e-17	7.13e-15	27.6735	YRDC	no
MAML2	-0.812815	6.65378	-9.41555	8.27e-17	7.24e-15	27.646	MAML2	no
EFCAB4A	0.987876	9.98349	9.41554	8.27e-17	7.24e-15	27.6459	EFCAB4A	no
ZNF614	0.970442	7.65414	9.41336	8.38e-17	7.3e-15	27.6331	ZNF614	no
OR51E2	2.14426	7.6122	9.40805	8.65e-17	7.49e-15	27.602	OR51E2	up
SLC25A42	0.60154	7.77346	9.401	9.02e-17	7.72e-15	27.5606	SLC25A42	no
SBK1	0.990869	6.63414	9.40094	9.02e-17	7.72e-15	27.5602	SBK1	no
DUS1L	0.805664	6.86995	9.39766	9.2e-17	7.83e-15	27.541	DUS1L	no
HIF3A	-0.539681	4.88519	-9.38752	9.77e-17	8.27e-15	27.4815	HIF3A	no
MGST3	-0.663578	8.99958	-9.38291	1e-16	8.45e-15	27.4544	MGST3	no
MYO6	1.23985	9.04635	9.36174	1.14e-16	9.53e-15	27.3303	MYO6	up
EPB41	0.484731	6.96325	9.35695	1.17e-16	9.76e-15	27.3022	EPB41	no
KLK1	-1.10297	6.05056	-9.34959	1.23e-16	1.01e-14	27.259	KLK1	down
AIMP2	0.710515	9.38349	9.34416	1.27e-16	1.04e-14	27.2272	AIMP2	no
ST3GAL5	-0.967141	6.55633	-9.32848	1.39e-16	1.13e-14	27.1353	ST3GAL5	no
CCDC110	0.775161	4.96768	9.32846	1.39e-16	1.13e-14	27.1353	CCDC110	no
FH	0.52114	9.74039	9.32244	1.44e-16	1.17e-14	27.1	FH	no
S1PR5	-1.06663	6.02823	-9.31769	1.48e-16	1.19e-14	27.0722	S1PR5	down
BNIPL	-0.965477	5.30492	-9.31366	1.52e-16	1.22e-14	27.0486	BNIPL	no
PGR	-0.893269	5.78031	-9.29569	1.69e-16	1.35e-14	26.9434	PGR	no
CD40	-0.778158	6.19539	-9.28928	1.75e-16	1.39e-14	26.9059	CD40	no
TDRD1	2.09079	5.61745	9.28826	1.77e-16	1.39e-14	26.8999	TDRD1	up
ABCG2	-1.06326	6.5092	-9.28667	1.78e-16	1.4e-14	26.8906	ABCG2	down
SYTL4	-0.603699	9.2309	-9.28365	1.81e-16	1.41e-14	26.8729	SYTL4	no
GPR160	1.27355	7.72455	9.27908	1.86e-16	1.45e-14	26.8462	GPR160	up
PRRG4	-0.847333	6.35733	-9.26147	2.07e-16	1.6e-14	26.7432	PRRG4	no
GALNT7	0.890055	8.39953	9.25409	2.16e-16	1.66e-14	26.7001	GALNT7	no
KCNIP3	-0.435431	5.46491	-9.25296	2.18e-16	1.66e-14	26.6935	KCNIP3	no
TRPC1	-0.838133	7.52003	-9.24691	2.26e-16	1.72e-14	26.6581	TRPC1	no
LRIG1	0.7585	8.46754	9.21964	2.65e-16	2.01e-14	26.4988	LRIG1	no
YPEL1	0.703561	6.59862	9.18581	3.24e-16	2.44e-14	26.3013	YPEL1	no
EGFR	-0.53993	8.15965	-9.15733	3.84e-16	2.87e-14	26.1352	EGFR	no
PPM1E	1.59202	6.57325	9.15432	3.91e-16	2.91e-14	26.1177	PPM1E	up
FHL2	-1.02878	8.42031	-9.13454	4.4e-16	3.26e-14	26.0024	FHL2	down
TCF7L1	-0.90883	5.34029	-9.12691	4.6e-16	3.39e-14	25.958	TCF7L1	no
PPP1R3C	-0.79096	6.27375	-9.10409	5.27e-16	3.86e-14	25.8251	PPP1R3C	no
ENTPD5	0.956327	9.76557	9.09208	5.65e-16	4.13e-14	25.7552	ENTPD5	no
SDK1	1.49739	6.24388	9.0831	5.96e-16	4.33e-14	25.703	SDK1	up
MRPL3	0.455157	9.03612	9.07668	6.19e-16	4.48e-14	25.6657	MRPL3	no
DPYS	-1.19963	5.14508	-9.06797	6.52e-16	4.69e-14	25.615	DPYS	down
LSAMP	-1.28244	7.34217	-9.06448	6.66e-16	4.77e-14	25.5947	LSAMP	down
CTF1	-0.831627	7.19092	-9.06365	6.69e-16	4.77e-14	25.5899	CTF1	no
COL7A1	-0.917547	7.28343	-9.06115	6.79e-16	4.81e-14	25.5754	COL7A1	no
WASF3	0.797441	7.91827	9.05259	7.14e-16	5.04e-14	25.5256	WASF3	no
KRT222	-0.632041	4.55231	-9.03663	7.85e-16	5.51e-14	25.433	KRT222	no
MYC	1.30566	8.95514	9.03279	8.03e-16	5.61e-14	25.4106	MYC	up
NEFH	-2.626	9.98719	-9.02889	8.21e-16	5.72e-14	25.388	NEFH	down
CANT1	0.605241	10.0274	9.01894	8.71e-16	6.03e-14	25.3302	CANT1	no
PLAG1	-0.733747	5.49057	-9.00308	9.57e-16	6.59e-14	25.2382	PLAG1	no
GGT6	-0.995572	5.4316	-8.99668	9.94e-16	6.82e-14	25.2011	GGT6	no
CAPG	-1.05736	5.39025	-8.98493	1.06e-15	7.27e-14	25.1329	CAPG	down
RGS12	-0.448739	8.28749	-8.98179	1.08e-15	7.38e-14	25.1147	RGS12	no
PGM5	-0.972319	8.00786	-8.97469	1.13e-15	7.66e-14	25.0735	PGM5	no
MXRA7	-0.565577	7.6749	-8.96843	1.17e-15	7.91e-14	25.0373	MXRA7	no
RBMS3	-0.612228	6.15775	-8.96687	1.18e-15	7.94e-14	25.0282	RBMS3	no
FMO2	-1.0096	6.09066	-8.95795	1.25e-15	8.34e-14	24.9766	FMO2	down
SCGB1A1	-2.35528	8.37638	-8.95537	1.27e-15	8.43e-14	24.9616	SCGB1A1	down
JAZF1	-0.851786	7.88212	-8.93425	1.44e-15	9.5e-14	24.8393	JAZF1	no
WDR55	0.473657	7.52112	8.9273	1.5e-15	9.85e-14	24.7991	WDR55	no
ZFP36L1	-0.472061	9.24759	-8.92649	1.5e-15	9.86e-14	24.7944	ZFP36L1	no
SLC18A2	-1.43474	5.98951	-8.90061	1.75e-15	1.14e-13	24.6447	SLC18A2	down
THSD4	-0.978388	8.46196	-8.89999	1.76e-15	1.14e-13	24.6411	THSD4	no
LPCAT2	-0.744947	5.84439	-8.89726	1.78e-15	1.16e-13	24.6253	LPCAT2	no
TOX3	1.33227	5.72843	8.87022	2.09e-15	1.35e-13	24.4691	TOX3	up
SOX7	-0.920252	5.91047	-8.83753	2.54e-15	1.63e-13	24.2803	SOX7	no
IQGAP2	0.768525	7.80499	8.83625	2.55e-15	1.63e-13	24.2729	IQGAP2	no
OR5P3	-0.657874	4.74814	-8.83102	2.63e-15	1.68e-13	24.2428	OR5P3	no
PTPN14	-0.616605	6.49256	-8.82359	2.75e-15	1.74e-13	24.1999	PTPN14	no
HSPB1	-0.86189	10.9799	-8.82287	2.76e-15	1.74e-13	24.1957	HSPB1	no
GPR87	-1.13582	5.45911	-8.81468	2.9e-15	1.82e-13	24.1485	GPR87	down
HLF	-0.795694	7.89322	-8.79002	3.35e-15	2.1e-13	24.0064	HLF	no
GUCY1A3	0.778113	10.4353	8.77919	3.57e-15	2.22e-13	23.9441	GUCY1A3	no
FGF10	-0.516422	4.86584	-8.77452	3.67e-15	2.28e-13	23.9171	FGF10	no
RRS1	0.693044	7.40993	8.76164	3.96e-15	2.44e-13	23.843	RRS1	no
ANXA2	-0.878829	8.68069	-8.75379	4.14e-15	2.55e-13	23.7978	ANXA2	no
AUTS2	-0.684673	8.06706	-8.74529	4.35e-15	2.67e-13	23.749	AUTS2	no
PDK3	-0.682105	6.99424	-8.74201	4.44e-15	2.71e-13	23.7301	PDK3	no
COL13A1	-0.84973	6.73849	-8.73833	4.53e-15	2.76e-13	23.709	COL13A1	no
CAV1	-1.0992	8.43373	-8.73563	4.61e-15	2.79e-13	23.6934	CAV1	down
GPR126	-1.0197	5.63738	-8.71822	5.1e-15	3.07e-13	23.5933	GPR126	down
MPPED2	-1.37302	8.09736	-8.71603	5.17e-15	3.1e-13	23.5808	MPPED2	down
PGAP1	-0.691211	6.82097	-8.70855	5.4e-15	3.23e-13	23.5378	PGAP1	no
ALDH3A1	-0.735635	5.41116	-8.69731	5.76e-15	3.43e-13	23.4733	ALDH3A1	no
ETV5	-0.835235	5.80135	-8.69464	5.85e-15	3.47e-13	23.4579	ETV5	no
PIGW	0.718852	6.53115	8.67427	6.59e-15	3.9e-13	23.341	PIGW	no
CSRP1	-0.603654	12.0227	-8.673	6.64e-15	3.91e-13	23.3338	CSRP1	no
LGALS3BP	-1.15151	7.33359	-8.67105	6.72e-15	3.94e-13	23.3226	LGALS3BP	down
GNPNAT1	0.516409	8.80045	8.6704	6.74e-15	3.94e-13	23.3189	GNPNAT1	no
ITGB8	-0.860367	6.75526	-8.6582	7.24e-15	4.21e-13	23.2489	ITGB8	no
KCNG3	1.65148	5.71995	8.65423	7.41e-15	4.29e-13	23.2261	KCNG3	up
P2RX6	-0.724525	5.74911	-8.6428	7.92e-15	4.57e-13	23.1606	P2RX6	no
ANKRD35	-0.87593	7.98135	-8.63671	8.21e-15	4.71e-13	23.1258	ANKRD35	no
FRMD6	-0.911766	7.77275	-8.63622	8.23e-15	4.71e-13	23.1229	FRMD6	no
CAMKK2	0.956874	8.45191	8.63193	8.44e-15	4.81e-13	23.0984	CAMKK2	no
CYP4X1	-1.23885	6.96694	-8.61857	9.12e-15	5.19e-13	23.0218	CYP4X1	down
ZSCAN2	0.609291	6.62545	8.5956	1.04e-14	5.9e-13	22.8905	ZSCAN2	no
CLDN8	1.35927	8.04109	8.59344	1.06e-14	5.96e-13	22.8781	CLDN8	up
ACSM1	1.55877	5.75321	8.59033	1.08e-14	6.04e-13	22.8603	ACSM1	up
NTRK3	-0.627549	4.84398	-8.5884	1.09e-14	6.09e-13	22.8493	NTRK3	no
KCNJ3	-1.43525	6.13353	-8.57952	1.15e-14	6.39e-13	22.7985	KCNJ3	down
PRNP	-0.494896	10.6672	-8.57095	1.2e-14	6.69e-13	22.7495	PRNP	no
PKIB	1.0324	7.49167	8.5561	1.31e-14	7.26e-13	22.6647	PKIB	up
ZNF511	0.741938	9.34887	8.55565	1.32e-14	7.26e-13	22.6622	ZNF511	no
LPIN1	-0.645812	7.52796	-8.54861	1.37e-14	7.53e-13	22.6219	LPIN1	no
CLIP4	-0.742972	6.9414	-8.54789	1.38e-14	7.54e-13	22.6178	CLIP4	no
EMB	0.589838	6.45937	8.5283	1.54e-14	8.41e-13	22.5061	EMB	no
IRX5	-0.701073	6.93322	-8.52227	1.6e-14	8.68e-13	22.4716	IRX5	no
HOXC4	1.48982	6.3526	8.50768	1.74e-14	9.41e-13	22.3884	HOXC4	up
TFCP2L1	-1.34396	6.26054	-8.48071	2.03e-14	1.1e-12	22.2348	TFCP2L1	down
KRT16	-1.08947	6.01009	-8.47709	2.08e-14	1.12e-12	22.2142	KRT16	down
FLJ22184	0.553062	8.07926	8.46913	2.17e-14	1.16e-12	22.1689	FLJ22184	no
PCDH9	-0.479844	4.84043	-8.46158	2.27e-14	1.21e-12	22.1259	PCDH9	no
SPON1	-0.917572	7.48384	-8.45714	2.33e-14	1.24e-12	22.1007	SPON1	no
APOBEC3G	-0.68761	5.42953	-8.45285	2.39e-14	1.27e-12	22.0763	APOBEC3G	no
RGS10	0.71821	7.22464	8.4428	2.53e-14	1.34e-12	22.0191	RGS10	no
SCPEP1	-0.647312	8.10296	-8.44032	2.57e-14	1.35e-12	22.0051	SCPEP1	no
CCND2	-0.653451	8.32864	-8.43534	2.64e-14	1.39e-12	21.9767	CCND2	no
TSC22D3	-0.777584	7.91165	-8.42754	2.77e-14	1.45e-12	21.9324	TSC22D3	no
PTRF	-0.699589	10.1699	-8.42406	2.82e-14	1.47e-12	21.9126	PTRF	no
ANTXR1	-0.498931	8.54517	-8.40416	3.17e-14	1.64e-12	21.7997	ANTXR1	no
SLC7A1	0.79556	9.12304	8.39204	3.4e-14	1.75e-12	21.7309	SLC7A1	no
DCUN1D4	-0.398342	8.32944	-8.39162	3.4e-14	1.75e-12	21.7285	DCUN1D4	no
PGRMC1	-0.541819	9.22578	-8.37554	3.74e-14	1.92e-12	21.6373	PGRMC1	no
MYRIP	0.775312	5.31725	8.36897	3.88e-14	1.99e-12	21.6001	MYRIP	no
ERG	2.00423	6.34599	8.36161	4.05e-14	2.06e-12	21.5584	ERG	up
RBPMS	-0.677379	7.69032	-8.3576	4.14e-14	2.11e-12	21.5357	RBPMS	no
CCDC68	-0.683826	5.63803	-8.33576	4.7e-14	2.38e-12	21.412	CCDC68	no
TM7SF3	-0.806598	8.41626	-8.32665	4.95e-14	2.5e-12	21.3605	TM7SF3	no
PARP3	-0.548125	7.35173	-8.32546	4.99e-14	2.51e-12	21.3537	PARP3	no
FHDC1	-1.23585	6.63714	-8.32272	5.07e-14	2.54e-12	21.3382	FHDC1	down
TACC1	-0.533446	9.33759	-8.31606	5.26e-14	2.63e-12	21.3006	TACC1	no
TMC5	1.26014	7.49557	8.31238	5.38e-14	2.68e-12	21.2798	TMC5	up
SYNM	-0.879546	9.99713	-8.29779	5.85e-14	2.9e-12	21.1973	SYNM	no
TP53INP1	0.72568	9.7092	8.29693	5.88e-14	2.91e-12	21.1924	TP53INP1	no
ATP1A2	-0.83346	5.90929	-8.29174	6.06e-14	2.99e-12	21.1631	ATP1A2	no
MYLK	-0.630878	9.51173	-8.28675	6.23e-14	3.06e-12	21.1349	MYLK	no
ITPKA	-0.50477	5.11034	-8.2782	6.55e-14	3.2e-12	21.0867	ITPKA	no
CPXM1	-0.756069	5.84089	-8.27811	6.55e-14	3.2e-12	21.0861	CPXM1	no
APCDD1	-0.933947	9.66571	-8.26823	6.93e-14	3.37e-12	21.0304	APCDD1	no
RNASE7	-0.657886	4.91854	-8.26724	6.97e-14	3.38e-12	21.0248	RNASE7	no
PTPRU	-0.527025	6.7577	-8.25995	7.27e-14	3.51e-12	20.9837	PTPRU	no
COL9A1	-1.40295	5.43633	-8.25666	7.41e-14	3.57e-12	20.9651	COL9A1	down
SNAP25	-0.698944	7.42874	-8.25595	7.44e-14	3.57e-12	20.9611	SNAP25	no
HJURP	0.746545	4.78951	8.25465	7.49e-14	3.59e-12	20.9538	HJURP	no
ACACB	-0.577773	9.56134	-8.25353	7.54e-14	3.6e-12	20.9475	ACACB	no
CXCL12	-0.936202	7.37817	-8.24667	7.85e-14	3.73e-12	20.9088	CXCL12	no
APOF	1.08077	5.06483	8.2361	8.34e-14	3.95e-12	20.8492	APOF	up
SCARA3	-0.716421	6.9233	-8.21735	9.28e-14	4.39e-12	20.7436	SCARA3	no
SEMA6D	-0.54056	4.98231	-8.20831	9.78e-14	4.61e-12	20.6927	SEMA6D	no
TLR3	-0.797631	6.62547	-8.19744	1.04e-13	4.89e-12	20.6316	TLR3	no
TRUB2	0.469641	7.10389	8.19427	1.06e-13	4.96e-12	20.6137	TRUB2	no
TOP2A	1.06621	5.83817	8.1854	1.12e-13	5.2e-12	20.5639	TOP2A	up
E2F5	0.699716	7.13586	8.18249	1.13e-13	5.28e-12	20.5475	E2F5	no
OCLN	0.69935	6.1726	8.1734	1.19e-13	5.53e-12	20.4964	OCLN	no
RAB3D	0.638096	9.66299	8.17313	1.2e-13	5.53e-12	20.4949	RAB3D	no
TRERF1	-0.611252	6.01378	-8.15723	1.31e-13	6.04e-12	20.4056	TRERF1	no
EEF1E1	0.504449	7.96381	8.15501	1.33e-13	6.1e-12	20.3931	EEF1E1	no
GNAO1	-0.701831	5.9351	-8.15124	1.36e-13	6.21e-12	20.372	GNAO1	no
LPAR1	-0.717776	9.17174	-8.14989	1.37e-13	6.24e-12	20.3644	LPAR1	no
PEG10	-0.757469	4.81736	-8.1488	1.37e-13	6.26e-12	20.3583	PEG10	no
RAB9B	-0.772683	6.63539	-8.14514	1.4e-13	6.37e-12	20.3378	RAB9B	no
PBX1	-0.484131	11.3725	-8.13323	1.5e-13	6.8e-12	20.2709	PBX1	no
BIK	0.770021	8.60044	8.11626	1.66e-13	7.47e-12	20.1758	BIK	no
PRICKLE2	-0.69682	7.08043	-8.11341	1.68e-13	7.57e-12	20.1598	PRICKLE2	no
CHDH	0.561493	7.00571	8.09138	1.91e-13	8.56e-12	20.0365	CHDH	no
RPL34	0.48376	10.0155	8.08825	1.94e-13	8.69e-12	20.0189	RPL34	no
KCNH8	1.47346	5.5264	8.08489	1.98e-13	8.83e-12	20.0001	KCNH8	up
CFH	-0.804915	6.611	-8.08334	2e-13	8.88e-12	19.9914	CFH	no
SMARCD3	-0.696464	6.51545	-8.08216	2.01e-13	8.91e-12	19.9849	SMARCD3	no
ICA1	0.556923	7.76354	8.07703	2.07e-13	9.15e-12	19.9561	ICA1	no
KLHL35	0.814707	6.22834	8.06772	2.18e-13	9.62e-12	19.9041	KLHL35	no
PON3	-0.948926	6.05018	-8.05967	2.29e-13	1e-11	19.8591	PON3	no
TLE2	-0.77442	8.48592	-8.059	2.3e-13	1.01e-11	19.8553	TLE2	no
ABCG1	0.538493	6.02531	8.05197	2.39e-13	1.04e-11	19.816	ABCG1	no
RHPN1	0.516408	4.97724	8.0456	2.48e-13	1.08e-11	19.7805	RHPN1	no
ANGPT1	-0.543545	4.97147	-8.03563	2.62e-13	1.14e-11	19.7248	ANGPT1	no
BAZ1A	0.554116	7.56063	8.03446	2.64e-13	1.14e-11	19.7183	BAZ1A	no
SLC22A17	-0.709471	7.94656	-8.02741	2.75e-13	1.19e-11	19.679	SLC22A17	no
HMMR	0.869379	5.36408	8.02536	2.78e-13	1.2e-11	19.6675	HMMR	no
DKK3	-0.615935	8.01326	-8.0085	3.06e-13	1.31e-11	19.5734	DKK3	no
PCSK6	0.577549	5.20142	8.00614	3.1e-13	1.33e-11	19.5603	PCSK6	no
RBP1	-0.639724	6.58039	-7.9976	3.25e-13	1.39e-11	19.5127	RBP1	no
CHRDL1	-1.07447	9.33225	-7.99728	3.26e-13	1.39e-11	19.5109	CHRDL1	down
LEPREL1	-1.06664	7.66943	-7.99692	3.27e-13	1.39e-11	19.5089	LEPREL1	down
CACHD1	-0.640291	5.98824	-7.98448	3.51e-13	1.48e-11	19.4396	CACHD1	no
CPLX3	-1.41569	9.69265	-7.98444	3.51e-13	1.48e-11	19.4394	CPLX3	down
ATP2B4	-0.788819	8.39041	-7.98431	3.51e-13	1.48e-11	19.4387	ATP2B4	no
CCDC85A	-0.783532	5.73437	-7.98231	3.55e-13	1.49e-11	19.4275	CCDC85A	no
NRG2	-0.466625	4.73746	-7.98171	3.56e-13	1.49e-11	19.4242	NRG2	no
PLD5	-0.930888	5.86295	-7.97072	3.79e-13	1.58e-11	19.363	PLD5	no
GPC1	-0.828295	7.35181	-7.95872	4.06e-13	1.69e-11	19.2963	GPC1	no
NUDT9	0.556346	8.4622	7.9423	4.45e-13	1.85e-11	19.205	NUDT9	no
ZNF577	1.10749	8.65114	7.93865	4.55e-13	1.88e-11	19.1847	ZNF577	up
FEM1B	-0.462706	9.66183	-7.93554	4.63e-13	1.91e-11	19.1674	FEM1B	no
BEX1	-1.39666	5.56344	-7.92668	4.87e-13	2e-11	19.1182	BEX1	down
ITM2C	-0.716611	9.292	-7.92499	4.91e-13	2.02e-11	19.1088	ITM2C	no
ZBTB20	-0.687932	9.78813	-7.92319	4.96e-13	2.03e-11	19.0988	ZBTB20	no
RUVBL1	0.713872	6.35567	7.91878	5.09e-13	2.08e-11	19.0743	RUVBL1	no
PAK1	-0.718241	7.48229	-7.90982	5.35e-13	2.18e-11	19.0246	PAK1	no
RNASE4	-0.903947	8.99175	-7.90191	5.6e-13	2.27e-11	18.9808	RNASE4	no
TMEM144	0.692191	7.46095	7.89656	5.77e-13	2.33e-11	18.9511	TMEM144	no
SULT2B1	-1.01518	6.28588	-7.89305	5.89e-13	2.37e-11	18.9317	SULT2B1	down
SAMD10	0.437558	5.02317	7.8929	5.89e-13	2.37e-11	18.9308	SAMD10	no
LMAN1L	-0.936185	6.14098	-7.88985	5.99e-13	2.41e-11	18.9139	LMAN1L	no
CYTH3	0.514244	6.13168	7.88694	6.09e-13	2.44e-11	18.8978	CYTH3	no
PRKCA	-0.701699	7.03885	-7.88654	6.11e-13	2.44e-11	18.8956	PRKCA	no
NLGN1	-0.715022	6.25662	-7.87988	6.34e-13	2.52e-11	18.8586	NLGN1	no
TNS4	-0.961569	5.09623	-7.87765	6.42e-13	2.55e-11	18.8463	TNS4	no
UGDH	0.740634	9.88622	7.86806	6.78e-13	2.68e-11	18.7932	UGDH	no
STOM	-0.492385	8.54593	-7.86053	7.07e-13	2.79e-11	18.7516	STOM	no
SYT9	-0.520899	4.969	-7.85246	7.4e-13	2.92e-11	18.7069	SYT9	no
ANTXR2	-0.956423	8.79998	-7.84566	7.69e-13	3.02e-11	18.6693	ANTXR2	no
DEFB1	-1.03643	5.266	-7.83132	8.34e-13	3.27e-11	18.59	DEFB1	down
NOP16	0.59802	6.53708	7.82809	8.49e-13	3.32e-11	18.5722	NOP16	no
SAMD5	1.20333	7.12797	7.82361	8.71e-13	3.39e-11	18.5474	SAMD5	up
STRA13	0.5728	10.1857	7.81919	8.93e-13	3.47e-11	18.523	STRA13	no
CD300LG	-0.560002	5.28948	-7.81185	9.31e-13	3.61e-11	18.4825	CD300LG	no
KITLG	-0.837337	7.5526	-7.80949	9.43e-13	3.65e-11	18.4695	KITLG	no
HOXB3	-0.800658	5.72238	-7.80501	9.67e-13	3.73e-11	18.4448	HOXB3	no
UBIAD1	0.383875	7.14828	7.78472	1.08e-12	4.17e-11	18.3329	UBIAD1	no
FAM83H	0.594167	7.51098	7.78177	1.1e-12	4.23e-11	18.3166	FAM83H	no
CTNND2	0.55953	4.97367	7.77626	1.14e-12	4.35e-11	18.2862	CTNND2	no
CCDC8	-0.744279	6.12303	-7.76569	1.21e-12	4.61e-11	18.228	CCDC8	no
FAM124A	-0.561295	5.76372	-7.76372	1.22e-12	4.64e-11	18.2172	FAM124A	no
ACSF2	-0.759815	5.06415	-7.76356	1.22e-12	4.64e-11	18.2163	ACSF2	no
ASPA	-0.952828	6.30788	-7.7541	1.29e-12	4.88e-11	18.1643	ASPA	no
MSRB3	-0.720597	7.76951	-7.74605	1.35e-12	5.09e-11	18.12	MSRB3	no
GAS1	-0.776085	6.35738	-7.74576	1.35e-12	5.09e-11	18.1184	GAS1	no
ATP1B1	-0.836504	8.27497	-7.73958	1.4e-12	5.25e-11	18.0844	ATP1B1	no
CORO1B	0.601074	8.7316	7.73526	1.43e-12	5.37e-11	18.0606	CORO1B	no
SDCCAG3	0.397147	6.23143	7.73482	1.43e-12	5.37e-11	18.0582	SDCCAG3	no
CCNB2	0.524594	4.88027	7.73261	1.45e-12	5.42e-11	18.046	CCNB2	no
RMI1	0.736374	7.08457	7.72938	1.48e-12	5.51e-11	18.0283	RMI1	no
TRIB1	1.0147	9.38712	7.72784	1.49e-12	5.54e-11	18.0198	TRIB1	up
FGF13	0.611746	7.03162	7.72699	1.5e-12	5.55e-11	18.0152	FGF13	no
F5	1.55824	5.80672	7.72646	1.5e-12	5.55e-11	18.0122	F5	up
SCUBE2	-1.64237	9.1894	-7.71927	1.57e-12	5.77e-11	17.9728	SCUBE2	down
ADSL	0.5864	6.99259	7.70349	1.71e-12	6.29e-11	17.8861	ADSL	no
ETS2	-1.02938	7.37052	-7.69853	1.76e-12	6.45e-11	17.8589	ETS2	down
VEGFA	-1.50327	9.01964	-7.68096	1.94e-12	7.1e-11	17.7626	VEGFA	down
DAPL1	-1.94716	5.83024	-7.67696	1.98e-12	7.24e-11	17.7407	DAPL1	down
TWIST1	1.40771	6.5763	7.67579	2e-12	7.27e-11	17.7342	TWIST1	up
TEAD1	-0.517778	7.35962	-7.67144	2.05e-12	7.41e-11	17.7104	TEAD1	no
MCOLN2	0.661696	5.00059	7.67134	2.05e-12	7.41e-11	17.7099	MCOLN2	no
MRPL24	0.44778	7.66738	7.66519	2.12e-12	7.66e-11	17.6762	MRPL24	no
CIDEB	-0.619241	7.95349	-7.65657	2.22e-12	8.01e-11	17.629	CIDEB	no
APOE	0.909926	7.03393	7.6539	2.26e-12	8.11e-11	17.6144	APOE	no
ZNF154	-0.567519	5.16643	-7.64848	2.33e-12	8.34e-11	17.5847	ZNF154	no
ABO	-1.01025	7.19389	-7.64434	2.38e-12	8.52e-11	17.5621	ABO	down
KCNMB1	-0.735744	8.13489	-7.64055	2.43e-12	8.68e-11	17.5413	KCNMB1	no
GATA3	-1.00896	5.01733	-7.63645	2.49e-12	8.86e-11	17.5189	GATA3	down
SLC25A15	0.600527	5.08609	7.62577	2.64e-12	9.38e-11	17.4606	SLC25A15	no
XYLB	0.501578	6.33731	7.62512	2.65e-12	9.39e-11	17.457	XYLB	no
DIAPH1	0.394862	7.21335	7.6223	2.69e-12	9.52e-11	17.4416	DIAPH1	no
QSOX2	0.590925	6.73219	7.61803	2.76e-12	9.72e-11	17.4183	QSOX2	no
GNAL	-0.547794	5.53153	-7.61251	2.84e-12	1e-10	17.3881	GNAL	no
KLF8	-0.616907	5.66488	-7.60878	2.9e-12	1.02e-10	17.3678	KLF8	no
ODAM	-1.04067	5.16069	-7.60508	2.96e-12	1.04e-10	17.3476	ODAM	down
ZNF30	0.85942	8.42234	7.59641	3.11e-12	1.09e-10	17.3003	ZNF30	no
KDELC2	-0.549709	9.02337	-7.59312	3.17e-12	1.1e-10	17.2824	KDELC2	no
TMEM173	-0.716003	8.3962	-7.59074	3.21e-12	1.12e-10	17.2694	TMEM173	no
E2F3	0.494152	7.27801	7.59017	3.22e-12	1.12e-10	17.2663	E2F3	no
ZNF146	0.496102	8.38687	7.58789	3.26e-12	1.13e-10	17.2538	ZNF146	no
GCNT2	-1.16037	7.93958	-7.5878	3.26e-12	1.13e-10	17.2534	GCNT2	down
ACRV1	0.655156	4.62587	7.58743	3.27e-12	1.13e-10	17.2513	ACRV1	no
NUSAP1	0.926552	6.24703	7.58464	3.32e-12	1.14e-10	17.2361	NUSAP1	no
ENC1	0.773285	6.27084	7.58361	3.34e-12	1.15e-10	17.2305	ENC1	no
SLC22A23	0.667864	6.78012	7.58292	3.35e-12	1.15e-10	17.2267	SLC22A23	no
COL27A1	-0.768151	5.65864	-7.58121	3.38e-12	1.16e-10	17.2174	COL27A1	no
SERPINB11	-2.29614	6.24246	-7.57486	3.5e-12	1.19e-10	17.1828	SERPINB11	down
GPM6B	-0.798635	8.157	-7.57067	3.59e-12	1.22e-10	17.16	GPM6B	no
ALDH1A3	0.319812	10.736	7.56939	3.61e-12	1.23e-10	17.1531	ALDH1A3	no
PRIMA1	-0.85279	5.26359	-7.56566	3.69e-12	1.25e-10	17.1327	PRIMA1	no
ALDH2	-1.00831	10.4418	-7.56515	3.7e-12	1.25e-10	17.1299	ALDH2	down
TNS1	-0.731329	8.79335	-7.5651	3.7e-12	1.25e-10	17.1297	TNS1	no
CNTFR	-0.78045	6.01948	-7.56342	3.73e-12	1.26e-10	17.1205	CNTFR	no
FMO5	1.20029	6.61248	7.56007	3.8e-12	1.28e-10	17.1023	FMO5	up
SMYD3	0.779543	6.76514	7.55901	3.83e-12	1.28e-10	17.0965	SMYD3	no
MRTO4	0.443015	7.51857	7.55111	4e-12	1.34e-10	17.0535	MRTO4	no
ENTPD3	-0.636695	5.06901	-7.54541	4.13e-12	1.37e-10	17.0225	ENTPD3	no
ZNF655	-1.06289	7.0459	-7.54316	4.18e-12	1.39e-10	17.0103	ZNF655	down
SLC27A2	0.859323	5.59255	7.54309	4.18e-12	1.39e-10	17.0099	SLC27A2	no
CA5B	0.686433	6.2223	7.54216	4.2e-12	1.39e-10	17.0048	CA5B	no
VARS	0.645546	7.49826	7.54158	4.22e-12	1.39e-10	17.0017	VARS	no
EFNA5	-0.999855	6.56977	-7.54	4.25e-12	1.4e-10	16.9931	EFNA5	no
LGR6	-0.947392	4.88425	-7.53746	4.31e-12	1.42e-10	16.9793	LGR6	no
ANXA6	-0.521174	6.80179	-7.53368	4.41e-12	1.44e-10	16.9588	ANXA6	no
CHRM3	1.26303	5.31923	7.53026	4.49e-12	1.47e-10	16.9402	CHRM3	up
CYTL1	-0.721607	4.6908	-7.52455	4.63e-12	1.51e-10	16.9091	CYTL1	no
F2RL1	1.07746	6.51672	7.52124	4.72e-12	1.54e-10	16.8912	F2RL1	up
CBLC	0.572862	5.45978	7.5177	4.81e-12	1.56e-10	16.8719	CBLC	no
ZDHHC23	0.820979	5.94199	7.51316	4.94e-12	1.6e-10	16.8473	ZDHHC23	no
HK2	0.643489	6.77533	7.50663	5.12e-12	1.66e-10	16.8119	HK2	no
TLCD1	0.924945	8.01403	7.49854	5.35e-12	1.73e-10	16.768	TLCD1	no
DBNDD1	0.576181	7.46029	7.49851	5.35e-12	1.73e-10	16.7678	DBNDD1	no
SEL1L	0.673643	7.44144	7.49593	5.43e-12	1.75e-10	16.7538	SEL1L	no
EFNB1	-0.571227	6.33335	-7.49146	5.57e-12	1.79e-10	16.7296	EFNB1	no
NEK3	0.770025	6.51626	7.48659	5.72e-12	1.83e-10	16.7032	NEK3	no
SERPINF1	-0.817821	10.958	-7.48525	5.76e-12	1.84e-10	16.696	SERPINF1	no
P4HTM	0.462891	8.95036	7.4705	6.25e-12	1.99e-10	16.616	P4HTM	no
MBP	0.489245	7.35912	7.46293	6.52e-12	2.07e-10	16.5751	MBP	no
MMP26	1.05745	4.87889	7.45858	6.68e-12	2.12e-10	16.5515	MMP26	up
SOX4	0.717274	8.25665	7.45397	6.85e-12	2.17e-10	16.5266	SOX4	no
HOXD11	-0.5018	4.49497	-7.45166	6.94e-12	2.19e-10	16.5141	HOXD11	no
PTGDS	-1.17607	8.0794	-7.44257	7.29e-12	2.3e-10	16.465	PTGDS	down
SNX22	0.951912	6.28467	7.4405	7.38e-12	2.32e-10	16.4538	SNX22	no
VASN	0.648152	7.79844	7.43402	7.65e-12	2.4e-10	16.4187	VASN	no
ITGA2	-0.768267	7.4438	-7.42215	8.16e-12	2.56e-10	16.3547	ITGA2	no
LRFN1	0.598616	6.46583	7.42032	8.25e-12	2.58e-10	16.3448	LRFN1	no
LRRFIP2	-0.497069	8.30471	-7.41961	8.28e-12	2.58e-10	16.3409	LRRFIP2	no
DDAH1	0.588573	7.86738	7.41333	8.57e-12	2.67e-10	16.307	DDAH1	no
PNMA1	-0.769679	8.99703	-7.41128	8.67e-12	2.69e-10	16.296	PNMA1	no
PDE3B	0.908442	7.73469	7.40308	9.07e-12	2.81e-10	16.2517	PDE3B	no
MATK	0.662709	7.10677	7.39902	9.27e-12	2.87e-10	16.2299	MATK	no
IRS1	-0.836039	7.59953	-7.39829	9.31e-12	2.88e-10	16.2259	IRS1	no
GNB2	0.483576	7.68297	7.39633	9.41e-12	2.9e-10	16.2154	GNB2	no
PRELID2	-0.5723	5.07904	-7.39381	9.54e-12	2.94e-10	16.2018	PRELID2	no
HMGXB4	0.397542	7.01156	7.39046	9.72e-12	2.98e-10	16.1837	HMGXB4	no
NHS	-0.729391	5.95394	-7.38997	9.75e-12	2.99e-10	16.1811	NHS	no
TRAF4	0.551513	6.15679	7.3886	9.82e-12	3e-10	16.1737	TRAF4	no
MEIS1	-0.633193	7.09741	-7.38141	1.02e-11	3.11e-10	16.135	MEIS1	no
TIMP3	-0.693699	10.0102	-7.38113	1.02e-11	3.11e-10	16.1335	TIMP3	no
FAM107A	-0.986461	8.48847	-7.38098	1.02e-11	3.11e-10	16.1327	FAM107A	no
ACACA	0.581528	8.31868	7.37527	1.06e-11	3.2e-10	16.1019	ACACA	no
CLIC6	-0.801078	7.38039	-7.37343	1.07e-11	3.23e-10	16.092	CLIC6	no
CACNA1D	1.10999	6.39956	7.37235	1.07e-11	3.24e-10	16.0862	CACNA1D	up
STARD8	-0.522168	7.67244	-7.36548	1.12e-11	3.36e-10	16.0492	STARD8	no
CALML3	-0.836198	5.2432	-7.36524	1.12e-11	3.36e-10	16.048	CALML3	no
PLA1A	1.53325	6.92522	7.36444	1.12e-11	3.37e-10	16.0436	PLA1A	up
CNN2	-0.492937	10.38	-7.36144	1.14e-11	3.42e-10	16.0275	CNN2	no
ZDHHC11	0.767812	6.65965	7.36006	1.15e-11	3.43e-10	16.0201	ZDHHC11	no
CMTM4	0.61517	8.33838	7.34273	1.26e-11	3.77e-10	15.927	CMTM4	no
LGALS3	-0.625008	8.81253	-7.33132	1.35e-11	4.01e-10	15.8657	LGALS3	no
FAM84B	0.431651	9.27743	7.3237	1.4e-11	4.17e-10	15.8248	FAM84B	no
ZNF121	0.525805	7.70915	7.31906	1.44e-11	4.27e-10	15.7999	ZNF121	no
NNT	-0.37395	6.84334	-7.3134	1.48e-11	4.39e-10	15.7695	NNT	no
GPR161	-0.408216	5.47386	-7.31258	1.49e-11	4.4e-10	15.7651	GPR161	no
KCTD5	0.429899	6.06724	7.31195	1.5e-11	4.41e-10	15.7617	KCTD5	no
EBF4	-0.700085	7.53118	-7.30716	1.54e-11	4.52e-10	15.7361	EBF4	no
FBXO32	-0.588702	7.71604	-7.30622	1.54e-11	4.53e-10	15.7311	FBXO32	no
PDE11A	-1.26195	5.96306	-7.30405	1.56e-11	4.58e-10	15.7194	PDE11A	down
SPG21	0.372132	7.54668	7.30254	1.57e-11	4.61e-10	15.7113	SPG21	no
CHP2	-0.821466	4.8045	-7.30196	1.58e-11	4.61e-10	15.7082	CHP2	no
EFCAB1	-0.715596	5.32789	-7.29213	1.67e-11	4.86e-10	15.6556	EFCAB1	no
KIF1A	-0.803836	8.87125	-7.2899	1.69e-11	4.91e-10	15.6437	KIF1A	no
PPAT	0.622999	8.12184	7.28441	1.74e-11	5.05e-10	15.6142	PPAT	no
KRT9	-0.639788	5.41768	-7.28232	1.76e-11	5.09e-10	15.6031	KRT9	no
CYTH2	0.886174	8.87175	7.28209	1.76e-11	5.09e-10	15.6018	CYTH2	no
CCNG2	0.436182	7.22723	7.28107	1.77e-11	5.11e-10	15.5964	CCNG2	no
BTG3	-0.515695	7.58697	-7.26764	1.91e-11	5.49e-10	15.5246	BTG3	no
DPH2	0.676889	7.13385	7.25747	2.02e-11	5.79e-10	15.4702	DPH2	no
CDC25C	0.330225	4.39054	7.24752	2.13e-11	6.1e-10	15.417	CDC25C	no
KLK15	0.646131	4.87473	7.24702	2.13e-11	6.11e-10	15.4144	KLK15	no
TRPC4	-0.675657	6.77647	-7.24587	2.15e-11	6.14e-10	15.4082	TRPC4	no
FGFRL1	0.701703	7.15226	7.24469	2.16e-11	6.16e-10	15.402	FGFRL1	no
ERBB3	0.49048	7.53862	7.23855	2.23e-11	6.36e-10	15.3692	ERBB3	no
CD47	-0.534651	8.46845	-7.23588	2.27e-11	6.44e-10	15.3549	CD47	no
NLRP12	0.323079	4.41778	7.22658	2.38e-11	6.76e-10	15.3053	NLRP12	no
TAF1D	0.557497	8.60916	7.22644	2.39e-11	6.76e-10	15.3046	TAF1D	no
IL20RA	0.600451	6.49361	7.21949	2.48e-11	7e-10	15.2675	IL20RA	no
WNT10A	-0.646986	5.26238	-7.21527	2.54e-11	7.15e-10	15.245	WNT10A	no
DPT	-1.18703	7.62377	-7.21485	2.54e-11	7.16e-10	15.2428	DPT	down
CYB5A	0.512767	8.71153	7.21238	2.58e-11	7.24e-10	15.2296	CYB5A	no
GABPB1	0.377019	6.647	7.211	2.6e-11	7.28e-10	15.2223	GABPB1	no
VTCN1	-0.827347	4.95387	-7.20719	2.65e-11	7.42e-10	15.202	VTCN1	no
LOC100130872	1.08522	6.05144	7.20328	2.71e-11	7.56e-10	15.1812	LOC100130872	up
VWA5A	-0.82375	7.52452	-7.20175	2.73e-11	7.61e-10	15.173	VWA5A	no
PRMT6	0.715426	7.18728	7.20051	2.75e-11	7.65e-10	15.1665	PRMT6	no
LCLAT1	0.613125	7.44584	7.19479	2.84e-11	7.88e-10	15.136	LCLAT1	no
ALDH3B2	1.1464	5.99007	7.18739	2.95e-11	8.17e-10	15.0966	ALDH3B2	up
ITGA9	-0.466669	6.68572	-7.18738	2.95e-11	8.17e-10	15.0966	ITGA9	no
C2	0.725966	5.77392	7.18522	2.99e-11	8.24e-10	15.0851	C2	no
CHST9	-0.722366	4.70311	-7.18509	2.99e-11	8.24e-10	15.0844	CHST9	no
CYP3A43	-0.480233	4.88599	-7.18306	3.02e-11	8.32e-10	15.0736	CYP3A43	no
FFAR2	0.68935	4.76767	7.18056	3.06e-11	8.42e-10	15.0604	FFAR2	no
RCAN3	-1.11411	10.0979	-7.17854	3.1e-11	8.49e-10	15.0496	RCAN3	down
PMM2	0.658271	8.28215	7.17732	3.12e-11	8.53e-10	15.0431	PMM2	no
FAM96A	0.525627	8.29799	7.16759	3.29e-11	8.98e-10	14.9914	FAM96A	no
PTP4A3	1.05172	8.19382	7.16645	3.31e-11	9e-10	14.9854	PTP4A3	up
DNAJC12	0.591674	4.85847	7.16616	3.31e-11	9e-10	14.9838	DNAJC12	no
ATP6V1G1	0.592758	9.54834	7.16583	3.32e-11	9e-10	14.9821	ATP6V1G1	no
YAP1	-0.457518	7.97762	-7.16582	3.32e-11	9e-10	14.982	YAP1	no
CFD	-0.918869	10.1421	-7.16528	3.33e-11	9.01e-10	14.9792	CFD	no
SLC16A2	-0.623453	6.91111	-7.16305	3.37e-11	9.1e-10	14.9673	SLC16A2	no
P2RY2	-0.59092	4.74808	-7.16282	3.37e-11	9.1e-10	14.9661	P2RY2	no
MANEAL	0.532094	6.95599	7.15531	3.51e-11	9.46e-10	14.9262	MANEAL	no
WWC3	-0.540845	8.00169	-7.15442	3.53e-11	9.49e-10	14.9215	WWC3	no
RBPMS2	-0.571958	10.0924	-7.14889	3.64e-11	9.76e-10	14.8922	RBPMS2	no
PIK3C2G	-0.554548	4.41427	-7.14217	3.77e-11	1.01e-09	14.8565	PIK3C2G	no
TBC1D16	0.464232	8.12998	7.14132	3.79e-11	1.01e-09	14.852	TBC1D16	no
LDHB	-0.656205	9.60988	-7.14032	3.81e-11	1.02e-09	14.8467	LDHB	no
WDR12	0.352428	6.98785	7.13965	3.82e-11	1.02e-09	14.8432	WDR12	no
ICAM3	0.53409	8.04866	7.13864	3.85e-11	1.02e-09	14.8378	ICAM3	no
MICALL1	-0.617291	7.18361	-7.13798	3.86e-11	1.02e-09	14.8343	MICALL1	no
RAB39B	0.788856	5.11207	7.13672	3.89e-11	1.03e-09	14.8276	RAB39B	no
MKI67	0.638645	5.32618	7.13413	3.94e-11	1.04e-09	14.8139	MKI67	no
RASSF5	-0.706608	7.70624	-7.13051	4.02e-11	1.06e-09	14.7948	RASSF5	no
HIST1H2AJ	0.768264	7.24097	7.12751	4.08e-11	1.08e-09	14.7788	HIST1H2AJ	no
CCDC82	-0.432635	7.33224	-7.12485	4.14e-11	1.09e-09	14.7648	CCDC82	no
OTUB2	0.332116	4.80492	7.12448	4.15e-11	1.09e-09	14.7628	OTUB2	no
PROM1	-1.3661	7.28382	-7.12129	4.22e-11	1.11e-09	14.7459	PROM1	down
TUBB2A	1.00207	8.40355	7.11799	4.3e-11	1.13e-09	14.7284	TUBB2A	up
SYNGR2	0.450541	5.76818	7.11653	4.33e-11	1.13e-09	14.7207	SYNGR2	no
AURKA	0.573004	5.12919	7.11471	4.38e-11	1.14e-09	14.7111	AURKA	no
HSPB8	-0.556482	8.36573	-7.11333	4.41e-11	1.15e-09	14.7038	HSPB8	no
CSRP2	-0.910762	8.64836	-7.10452	4.63e-11	1.2e-09	14.6572	CSRP2	no
FEZ1	-0.361439	4.92475	-7.10449	4.63e-11	1.2e-09	14.657	FEZ1	no
PNMAL1	-0.871605	5.63808	-7.10111	4.71e-11	1.22e-09	14.6392	PNMAL1	no
TRIP13	0.655769	4.96546	7.1	4.74e-11	1.23e-09	14.6333	TRIP13	no
CDC42EP2	0.533076	5.39777	7.09737	4.81e-11	1.24e-09	14.6194	CDC42EP2	no
DLGAP5	0.616278	4.83568	7.09693	4.82e-11	1.24e-09	14.6171	DLGAP5	no
NTN1	-0.60282	4.90724	-7.09469	4.88e-11	1.25e-09	14.6052	NTN1	no
KCNH3	-0.531708	6.34661	-7.0863	5.1e-11	1.31e-09	14.5609	KCNH3	no
SPARCL1	-0.604347	10.6235	-7.0854	5.13e-11	1.31e-09	14.5561	SPARCL1	no
MAT2B	-0.436455	9.25133	-7.07985	5.29e-11	1.35e-09	14.5268	MAT2B	no
TMEM161A	0.443326	6.93942	7.07828	5.33e-11	1.36e-09	14.5185	TMEM161A	no
PTS	0.454567	9.57383	7.07615	5.39e-11	1.37e-09	14.5073	PTS	no
ITGA3	-0.669434	6.30857	-7.06966	5.58e-11	1.42e-09	14.4731	ITGA3	no
NPTN	-0.327804	10.4921	-7.06867	5.61e-11	1.43e-09	14.4679	NPTN	no
PPAP2B	-0.721412	8.03772	-7.06518	5.72e-11	1.45e-09	14.4494	PPAP2B	no
CDC14B	-0.600498	6.64227	-7.06164	5.83e-11	1.48e-09	14.4308	CDC14B	no
EXOSC4	0.484675	7.36388	7.05731	5.97e-11	1.51e-09	14.4079	EXOSC4	no
FEV	1.07469	6.49485	7.05532	6.03e-11	1.52e-09	14.3974	FEV	up
KRT7	-0.756794	4.81025	-7.05389	6.08e-11	1.53e-09	14.3899	KRT7	no
LAPTM4B	-0.604153	7.34786	-7.04976	6.22e-11	1.56e-09	14.3682	LAPTM4B	no
ELOVL4	-0.739994	8.19948	-7.04952	6.23e-11	1.56e-09	14.3669	ELOVL4	no
PPP3CA	0.551481	9.46544	7.04592	6.35e-11	1.59e-09	14.3479	PPP3CA	no
ASPN	1.04789	5.87021	7.03985	6.56e-11	1.64e-09	14.316	ASPN	up
L3MBTL4	-0.424626	4.37458	-7.03916	6.58e-11	1.64e-09	14.3123	L3MBTL4	no
MRPL15	0.694905	7.303	7.03799	6.62e-11	1.65e-09	14.3062	MRPL15	no
PNKP	0.594065	7.52407	7.03126	6.87e-11	1.71e-09	14.2707	PNKP	no
SNCG	-0.714788	5.72343	-7.02999	6.92e-11	1.72e-09	14.2641	SNCG	no
INSM1	1.22534	4.9517	7.02706	7.03e-11	1.74e-09	14.2487	INSM1	up
CAMK2B	0.857599	6.25093	7.02054	7.28e-11	1.8e-09	14.2144	CAMK2B	no
OLFML2A	-0.873308	6.48538	-7.01901	7.34e-11	1.81e-09	14.2063	OLFML2A	no
CBX8	0.469195	5.52178	7.01694	7.42e-11	1.83e-09	14.1954	CBX8	no
DMD	-0.479146	5.81278	-7.01635	7.44e-11	1.83e-09	14.1924	DMD	no
OAT	-0.804556	9.10764	-7.01618	7.45e-11	1.83e-09	14.1914	OAT	no
BZW2	0.728799	9.43256	7.01018	7.69e-11	1.89e-09	14.1599	BZW2	no
CBX4	0.453966	5.74352	7.00636	7.85e-11	1.93e-09	14.1399	CBX4	no
NGRN	-0.276476	10.435	-7.00454	7.93e-11	1.94e-09	14.1303	NGRN	no
CFL2	-0.534113	7.12289	-7.00339	7.98e-11	1.95e-09	14.1242	CFL2	no
EFEMP2	-0.662869	8.88358	-7.00249	8.02e-11	1.96e-09	14.1195	EFEMP2	no
SPDEF	0.552316	10.218	7.00175	8.05e-11	1.96e-09	14.1157	SPDEF	no
HYI	-0.562924	7.97341	-7.00152	8.06e-11	1.96e-09	14.1144	HYI	no
FAM53A	0.502968	6.10409	7.00087	8.09e-11	1.96e-09	14.1111	FAM53A	no
NPR2	-0.628521	6.01731	-7.00066	8.1e-11	1.96e-09	14.1099	NPR2	no
GNL2	0.401584	10.5902	7.00056	8.1e-11	1.96e-09	14.1094	GNL2	no
OR5P2	-0.300808	4.27448	-6.99263	8.45e-11	2.04e-09	14.0678	OR5P2	no
ID3	-0.896261	8.14136	-6.99098	8.53e-11	2.06e-09	14.0591	ID3	no
KCNAB1	-0.680558	6.53949	-6.98788	8.67e-11	2.09e-09	14.0429	KCNAB1	no
PODXL2	0.806058	7.04338	6.98584	8.77e-11	2.11e-09	14.0322	PODXL2	no
CPNE6	-0.799186	5.99598	-6.98548	8.78e-11	2.11e-09	14.0303	CPNE6	no
HOXA13	-0.765794	8.96216	-6.98527	8.79e-11	2.11e-09	14.0292	HOXA13	no
GCLC	-0.562895	7.55192	-6.98257	8.92e-11	2.14e-09	14.015	GCLC	no
RRM2	1.10072	6.02097	6.97815	9.14e-11	2.18e-09	13.9919	RRM2	up
PLCB4	0.446413	6.04516	6.97523	9.28e-11	2.21e-09	13.9765	PLCB4	no
EIF4EBP1	0.802742	6.63102	6.97409	9.34e-11	2.22e-09	13.9706	EIF4EBP1	no
CENPO	0.552431	6.40078	6.97172	9.46e-11	2.25e-09	13.9582	CENPO	no
RNF39	-0.975633	6.65238	-6.96946	9.57e-11	2.27e-09	13.9463	RNF39	no
GABRB3	0.994832	6.57013	6.96798	9.65e-11	2.29e-09	13.9386	GABRB3	no
ZIC2	1.49507	5.18055	6.96292	9.91e-11	2.35e-09	13.9121	ZIC2	up
CD3EAP	0.433895	5.56403	6.95657	1.03e-10	2.42e-09	13.8789	CD3EAP	no
RIPK2	0.531908	7.11934	6.95553	1.03e-10	2.43e-09	13.8734	RIPK2	no
COL9A2	1.30937	7.48421	6.95393	1.04e-10	2.45e-09	13.865	COL9A2	up
SNX7	-0.625804	6.22534	-6.9527	1.05e-10	2.46e-09	13.8586	SNX7	no
IGF1	-0.862547	8.01489	-6.94667	1.08e-10	2.54e-09	13.827	IGF1	no
NUDT10	-0.811184	6.96264	-6.94298	1.1e-10	2.59e-09	13.8077	NUDT10	no
EPHA2	-0.675772	5.13257	-6.94142	1.11e-10	2.6e-09	13.7996	EPHA2	no
SLC10A7	0.470315	6.15085	6.94096	1.11e-10	2.61e-09	13.7972	SLC10A7	no
ZSCAN16	0.718838	7.33738	6.93938	1.12e-10	2.62e-09	13.789	ZSCAN16	no
TPM1	-0.547956	9.83354	-6.93728	1.14e-10	2.65e-09	13.778	TPM1	no
TGFB3	-0.937863	7.87579	-6.93639	1.14e-10	2.66e-09	13.7733	TGFB3	no
AK2	0.382338	7.19761	6.92855	1.19e-10	2.77e-09	13.7324	AK2	no
DAPK1	0.928839	7.10909	6.92757	1.2e-10	2.78e-09	13.7272	DAPK1	no
ID1	-1.17675	5.93921	-6.9267	1.2e-10	2.79e-09	13.7227	ID1	down
GNAI2	-0.594676	8.80012	-6.92059	1.24e-10	2.87e-09	13.6908	GNAI2	no
PDGFC	-0.686979	6.6542	-6.91803	1.26e-10	2.91e-09	13.6775	PDGFC	no
LRRC56	0.634755	7.56066	6.91541	1.28e-10	2.95e-09	13.6638	LRRC56	no
TMEM35	-0.577337	5.20409	-6.91301	1.29e-10	2.98e-09	13.6513	TMEM35	no
CRTAP	-0.405682	8.63426	-6.91046	1.31e-10	3.02e-09	13.6379	CRTAP	no
CHD1L	0.425579	6.99734	6.9085	1.33e-10	3.04e-09	13.6277	CHD1L	no
PJA1	-0.574701	6.49109	-6.90849	1.33e-10	3.04e-09	13.6277	PJA1	no
PKN1	0.60845	7.48274	6.90729	1.33e-10	3.05e-09	13.6214	PKN1	no
ADPRHL1	0.500322	4.81369	6.90091	1.38e-10	3.15e-09	13.5882	ADPRHL1	no
SMOX	0.70824	7.31241	6.89295	1.44e-10	3.28e-09	13.5467	SMOX	no
PHGDH	-0.523627	11.0302	-6.89291	1.44e-10	3.28e-09	13.5465	PHGDH	no
PLS3	-0.71638	8.8803	-6.89266	1.44e-10	3.28e-09	13.5452	PLS3	no
BPHL	0.588966	8.76833	6.89096	1.46e-10	3.31e-09	13.5363	BPHL	no
ANAPC5	0.571255	6.92754	6.89046	1.46e-10	3.31e-09	13.5337	ANAPC5	no
SLC15A2	-0.978873	8.04546	-6.88563	1.5e-10	3.39e-09	13.5086	SLC15A2	no
MYO1G	0.557214	4.90465	6.88558	1.5e-10	3.39e-09	13.5083	MYO1G	no
TMEM87A	0.366247	9.08697	6.88469	1.51e-10	3.4e-09	13.5037	TMEM87A	no
TTYH3	0.448917	7.80165	6.87925	1.55e-10	3.49e-09	13.4753	TTYH3	no
JPH2	-0.599924	6.14034	-6.87653	1.57e-10	3.54e-09	13.4612	JPH2	no
TXN	0.475324	9.34437	6.87609	1.58e-10	3.54e-09	13.4589	TXN	no
LARP1B	0.404868	8.43494	6.87452	1.59e-10	3.56e-09	13.4508	LARP1B	no
AGMAT	0.737312	5.27575	6.8656	1.67e-10	3.73e-09	13.4044	AGMAT	no
ATP8A2	1.62626	6.10788	6.86535	1.67e-10	3.73e-09	13.4031	ATP8A2	up
MICALCL	1.03008	6.37247	6.86136	1.7e-10	3.81e-09	13.3823	MICALCL	up
LEPR	-0.399555	6.23032	-6.85963	1.72e-10	3.84e-09	13.3733	LEPR	no
FLNC	-0.715268	10.6636	-6.85767	1.74e-10	3.87e-09	13.3632	FLNC	no
MPP2	-0.553649	6.07229	-6.85614	1.75e-10	3.9e-09	13.3552	MPP2	no
TMEM69	0.504965	6.89897	6.85585	1.76e-10	3.9e-09	13.3537	TMEM69	no
PPP1R14A	-0.599962	11.4829	-6.85075	1.8e-10	4e-09	13.3272	PPP1R14A	no
GTSE1	0.404706	4.76161	6.848	1.83e-10	4.05e-09	13.3129	GTSE1	no
NOX4	0.694784	5.00394	6.83968	1.91e-10	4.23e-09	13.2697	NOX4	no
AKAP7	-0.577662	7.5117	-6.8354	1.96e-10	4.32e-09	13.2476	AKAP7	no
HOXD9	-0.473811	5.03376	-6.8352	1.96e-10	4.32e-09	13.2465	HOXD9	no
SND1	0.421131	9.35374	6.83431	1.97e-10	4.33e-09	13.2419	SND1	no
WWC1	0.628937	5.88363	6.82906	2.02e-10	4.44e-09	13.2147	WWC1	no
COL28A1	1.09406	6.00882	6.82873	2.03e-10	4.45e-09	13.213	COL28A1	up
PITX1	-0.778951	7.55808	-6.82714	2.04e-10	4.48e-09	13.2047	PITX1	no
KLHL13	-0.678359	6.98818	-6.82018	2.12e-10	4.64e-09	13.1687	KLHL13	no
RARG	-0.429111	4.95178	-6.81555	2.17e-10	4.75e-09	13.1447	RARG	no
CHST3	-0.585351	6.79864	-6.81009	2.24e-10	4.88e-09	13.1164	CHST3	no
PGF	-0.782685	6.89095	-6.80669	2.28e-10	4.96e-09	13.0988	PGF	no
NRG4	-1.30511	6.40481	-6.80144	2.34e-10	5.09e-09	13.0716	NRG4	down
ITPA	0.347428	6.52079	6.80081	2.35e-10	5.1e-09	13.0684	ITPA	no
LETM1	0.381315	5.91073	6.79859	2.38e-10	5.16e-09	13.0569	LETM1	no
SEC23A	-0.384661	6.98765	-6.79762	2.39e-10	5.18e-09	13.0519	SEC23A	no
CPAMD8	-0.777413	5.53967	-6.79529	2.42e-10	5.23e-09	13.0399	CPAMD8	no
PWP2	0.341277	4.93043	6.78757	2.52e-10	5.44e-09	13	PWP2	no
ZBTB4	-0.397369	10.2925	-6.78743	2.52e-10	5.44e-09	12.9992	ZBTB4	no
FOLR1	-0.440842	4.60159	-6.78401	2.57e-10	5.53e-09	12.9815	FOLR1	no
EMCN	-0.71919	5.83366	-6.7812	2.61e-10	5.6e-09	12.967	EMCN	no
SOX2	-0.656465	5.76009	-6.77517	2.69e-10	5.78e-09	12.9359	SOX2	no
FBXO2	-0.482743	5.66956	-6.77464	2.7e-10	5.79e-09	12.9332	FBXO2	no
SCD5	-0.601282	7.2976	-6.77047	2.76e-10	5.91e-09	12.9116	SCD5	no
IGFN1	0.596364	4.75435	6.76981	2.77e-10	5.92e-09	12.9082	IGFN1	no
F12	0.588117	5.74113	6.76281	2.87e-10	6.13e-09	12.8722	F12	no
CYB5R3	-0.288733	10.7058	-6.75968	2.92e-10	6.23e-09	12.856	CYB5R3	no
SPTLC3	-0.374507	5.19431	-6.75651	2.97e-10	6.32e-09	12.8397	SPTLC3	no
PTPRT	0.932297	5.24827	6.75502	3e-10	6.36e-09	12.832	PTPRT	no
MST4	-0.684194	8.59114	-6.75479	3e-10	6.36e-09	12.8308	MST4	no
PRDX5	-0.498349	9.60229	-6.75132	3.05e-10	6.47e-09	12.8129	PRDX5	no
ST6GALNAC1	1.08119	5.65219	6.74949	3.08e-10	6.52e-09	12.8035	ST6GALNAC1	up
SOX15	-0.63017	7.32849	-6.74397	3.18e-10	6.71e-09	12.775	SOX15	no
SPOCK3	-0.874772	7.36647	-6.73921	3.26e-10	6.87e-09	12.7505	SPOCK3	no
PLCD4	-0.858575	7.9011	-6.73874	3.26e-10	6.87e-09	12.7481	PLCD4	no
PICALM	0.31268	7.43075	6.73862	3.27e-10	6.87e-09	12.7475	PICALM	no
KCNK3	-0.818292	5.55509	-6.73687	3.3e-10	6.92e-09	12.7385	KCNK3	no
RAB30	0.555948	6.47787	6.73604	3.31e-10	6.94e-09	12.7342	RAB30	no
TRAP1	0.387118	5.99369	6.73505	3.33e-10	6.97e-09	12.7291	TRAP1	no
SFXN4	0.476437	7.04663	6.73431	3.34e-10	6.99e-09	12.7253	SFXN4	no
LACTB	0.44207	6.87789	6.73123	3.4e-10	7.09e-09	12.7094	LACTB	no
WHSC1L1	-0.303875	7.39946	-6.72813	3.45e-10	7.2e-09	12.6935	WHSC1L1	no
UNC5B	-0.578213	5.36062	-6.72774	3.46e-10	7.2e-09	12.6915	UNC5B	no
TBX1	0.562262	5.45209	6.72567	3.5e-10	7.27e-09	12.6809	TBX1	no
VCL	-0.619795	10.4001	-6.72078	3.59e-10	7.45e-09	12.6557	VCL	no
ALAD	-0.41216	5.66611	-6.71641	3.67e-10	7.61e-09	12.6332	ALAD	no
TRIB2	-0.630626	8.93254	-6.71586	3.68e-10	7.63e-09	12.6304	TRIB2	no
OXER1	-0.361176	4.87884	-6.71203	3.76e-10	7.77e-09	12.6107	OXER1	no
CASKIN1	0.516092	5.25572	6.70438	3.91e-10	8.08e-09	12.5715	CASKIN1	no
BCL9	0.56464	8.16623	6.7038	3.92e-10	8.09e-09	12.5685	BCL9	no
CALD1	-0.42335	9.64186	-6.70223	3.96e-10	8.15e-09	12.5604	CALD1	no
ADARB2	0.758998	4.89806	6.70143	3.97e-10	8.17e-09	12.5563	ADARB2	no
GRAMD1A	0.389243	8.24167	6.70051	3.99e-10	8.2e-09	12.5516	GRAMD1A	no
LMO4	-0.367414	8.45956	-6.69564	4.1e-10	8.4e-09	12.5266	LMO4	no
ATP7B	0.590155	6.94511	6.69339	4.14e-10	8.49e-09	12.5151	ATP7B	no
CAMK2G	-0.360892	7.40055	-6.69291	4.15e-10	8.49e-09	12.5126	CAMK2G	no
ANGPTL4	-0.801729	7.71011	-6.69277	4.16e-10	8.49e-09	12.5119	ANGPTL4	no
CRB3	0.434537	6.55726	6.69127	4.19e-10	8.55e-09	12.5042	CRB3	no
NRSN2	-0.517779	9.16207	-6.69061	4.2e-10	8.56e-09	12.5008	NRSN2	no
RNF44	0.577646	7.54464	6.68977	4.22e-10	8.59e-09	12.4965	RNF44	no
VSIG2	-1.40278	7.83074	-6.68926	4.23e-10	8.6e-09	12.4939	VSIG2	down
FZD7	-0.710197	7.37171	-6.68176	4.4e-10	8.94e-09	12.4554	FZD7	no
MYL9	-0.542277	10.343	-6.67831	4.49e-10	9.09e-09	12.4378	MYL9	no
REPIN1	0.458039	7.38564	6.67364	4.6e-10	9.3e-09	12.4139	REPIN1	no
CHD9	-0.382998	9.65474	-6.67266	4.62e-10	9.33e-09	12.4088	CHD9	no
TMEM45B	1.57748	7.38439	6.67095	4.66e-10	9.4e-09	12.4001	TMEM45B	up
ASPH	-0.38081	6.03562	-6.67085	4.66e-10	9.4e-09	12.3996	ASPH	no
LSR	0.415821	7.60016	6.66877	4.72e-10	9.49e-09	12.3889	LSR	no
HIPK2	0.446884	9.40724	6.66482	4.81e-10	9.67e-09	12.3687	HIPK2	no
OSTC	0.396904	8.88384	6.65648	5.03e-10	1.01e-08	12.326	OSTC	no
PHLDB3	0.389844	5.95758	6.65631	5.03e-10	1.01e-08	12.3251	PHLDB3	no
ST8SIA1	-0.769239	6.58623	-6.65607	5.04e-10	1.01e-08	12.3239	ST8SIA1	no
PROK1	-1.05395	5.7833	-6.65357	5.11e-10	1.02e-08	12.3111	PROK1	down
HAAO	-0.486971	5.03316	-6.65045	5.19e-10	1.04e-08	12.2952	HAAO	no
KPNA2	0.452864	6.53037	6.65015	5.2e-10	1.04e-08	12.2937	KPNA2	no
TSLP	-0.637471	5.63381	-6.64583	5.32e-10	1.06e-08	12.2716	TSLP	no
CETN2	-0.354747	9.95811	-6.63405	5.66e-10	1.12e-08	12.2114	CETN2	no
LYAR	0.396204	7.83929	6.63203	5.72e-10	1.13e-08	12.2011	LYAR	no
ONECUT2	0.620414	4.60005	6.62913	5.8e-10	1.15e-08	12.1863	ONECUT2	no
GAS6	-0.414855	7.54704	-6.62594	5.9e-10	1.17e-08	12.17	GAS6	no
LGALS1	-0.559794	10.0166	-6.62523	5.92e-10	1.17e-08	12.1664	LGALS1	no
ADRA1A	-0.520459	5.44781	-6.6251	5.93e-10	1.17e-08	12.1657	ADRA1A	no
TMEM2	0.671049	7.85829	6.62367	5.97e-10	1.18e-08	12.1584	TMEM2	no
UGT1A6	-0.48907	4.44764	-6.61591	6.22e-10	1.22e-08	12.1189	UGT1A6	no
NRG1	-0.315342	4.67234	-6.60861	6.46e-10	1.27e-08	12.0817	NRG1	no
COL2A1	1.91974	5.5253	6.60702	6.51e-10	1.28e-08	12.0736	COL2A1	up
PDGFD	-0.700475	5.98875	-6.60225	6.68e-10	1.31e-08	12.0493	PDGFD	no
RGN	-0.675835	5.54155	-6.59989	6.76e-10	1.32e-08	12.0373	RGN	no
SYNJ2	0.439077	6.44309	6.59964	6.77e-10	1.32e-08	12.036	SYNJ2	no
GART	0.361273	7.24425	6.59723	6.86e-10	1.34e-08	12.0238	GART	no
ENHO	-0.478682	4.92482	-6.59389	6.98e-10	1.36e-08	12.0068	ENHO	no
KIAA1244	0.586122	7.87797	6.58578	7.28e-10	1.42e-08	11.9655	KIAA1244	no
PARVA	-0.409202	8.01505	-6.58291	7.39e-10	1.44e-08	11.9509	PARVA	no
EDEM3	0.517703	8.37699	6.58163	7.44e-10	1.45e-08	11.9444	EDEM3	no
CYFIP2	0.586313	7.31572	6.5804	7.49e-10	1.45e-08	11.9381	CYFIP2	no
PDCD2L	0.735437	7.23485	6.57611	7.65e-10	1.48e-08	11.9164	PDCD2L	no
SMOC2	0.785018	7.4912	6.5745	7.72e-10	1.49e-08	11.9081	SMOC2	no
LMNB1	0.751108	6.12967	6.57438	7.72e-10	1.49e-08	11.9076	LMNB1	no
GUF1	0.528776	7.27697	6.56647	8.05e-10	1.55e-08	11.8674	GUF1	no
GATM	-0.475683	5.34604	-6.56477	8.12e-10	1.57e-08	11.8587	GATM	no
HS3ST3A1	-0.500368	5.8171	-6.55823	8.4e-10	1.62e-08	11.8256	HS3ST3A1	no
RPL29	0.746783	8.25157	6.557	8.46e-10	1.63e-08	11.8193	RPL29	no
IPO4	0.622214	6.92174	6.55375	8.6e-10	1.65e-08	11.8028	IPO4	no
TBC1D4	0.607252	8.92986	6.55288	8.64e-10	1.66e-08	11.7984	TBC1D4	no
TMED3	0.254741	9.60196	6.54978	8.78e-10	1.68e-08	11.7827	TMED3	no
SLC12A8	0.630572	6.2528	6.54774	8.87e-10	1.7e-08	11.7724	SLC12A8	no
SEMA3D	-0.645921	5.44041	-6.54464	9.02e-10	1.72e-08	11.7567	SEMA3D	no
RGAG4	-0.450809	6.2143	-6.54413	9.04e-10	1.73e-08	11.7541	RGAG4	no
RARB	-0.429561	5.69591	-6.54346	9.07e-10	1.73e-08	11.7507	RARB	no
EBP	-0.775375	7.33269	-6.54273	9.11e-10	1.73e-08	11.747	EBP	no
CENPM	0.741696	5.22862	6.539	9.28e-10	1.77e-08	11.7281	CENPM	no
VPS37C	0.276352	10.888	6.53859	9.3e-10	1.77e-08	11.726	VPS37C	no
ILK	-0.359501	9.79208	-6.53846	9.31e-10	1.77e-08	11.7254	ILK	no
ZNF334	-0.778002	6.91658	-6.53591	9.43e-10	1.79e-08	11.7125	ZNF334	no
SLC25A22	0.721816	8.15408	6.53339	9.56e-10	1.81e-08	11.6997	SLC25A22	no
VAV2	0.352691	6.41917	6.53307	9.57e-10	1.81e-08	11.6981	VAV2	no
EEF2	0.343556	11.7457	6.53093	9.68e-10	1.83e-08	11.6872	EEF2	no
UCN	0.511935	5.18547	6.52924	9.77e-10	1.84e-08	11.6787	UCN	no
SLC7A11	0.751425	5.51002	6.52749	9.86e-10	1.86e-08	11.6698	SLC7A11	no
MRPS33	0.519237	8.32912	6.52672	9.9e-10	1.86e-08	11.6659	MRPS33	no
CLIP3	-0.396525	9.40235	-6.52396	1e-09	1.88e-08	11.6519	CLIP3	no
ANKDD1A	-0.518863	7.59856	-6.52314	1.01e-09	1.89e-08	11.6478	ANKDD1A	no
SLC25A4	-0.391784	8.51726	-6.51762	1.04e-09	1.94e-08	11.6199	SLC25A4	no
FMOD	0.971993	8.5612	6.51622	1.04e-09	1.95e-08	11.6128	FMOD	no
SNX10	0.57041	5.68882	6.51404	1.06e-09	1.97e-08	11.6018	SNX10	no
SPRY4	-1.10078	6.76825	-6.51179	1.07e-09	2e-08	11.5904	SPRY4	down
HMG20B	0.536742	7.2136	6.50975	1.08e-09	2.01e-08	11.5801	HMG20B	no
EML2	-0.427581	6.74513	-6.49664	1.16e-09	2.15e-08	11.5139	EML2	no
F2RL2	0.54839	4.78769	6.48469	1.23e-09	2.29e-08	11.4536	F2RL2	no
PDE7B	-0.531911	5.89762	-6.47669	1.28e-09	2.38e-08	11.4133	PDE7B	no
LRRC8B	0.439898	6.04569	6.46906	1.33e-09	2.47e-08	11.3749	LRRC8B	no
PUS1	0.566143	7.91271	6.46828	1.34e-09	2.48e-08	11.3709	PUS1	no
CLIC3	-0.535602	5.36833	-6.46678	1.35e-09	2.5e-08	11.3634	CLIC3	no
LOC389332	0.879154	4.91698	6.46285	1.38e-09	2.54e-08	11.3436	LOC389332	no
TIMELESS	0.386935	7.26044	6.46211	1.38e-09	2.55e-08	11.3399	TIMELESS	no
SPRY2	-0.64002	8.74029	-6.45251	1.45e-09	2.68e-08	11.2916	SPRY2	no
TMEM158	-0.653768	9.12268	-6.45179	1.46e-09	2.68e-08	11.288	TMEM158	no
SLC2A9	-0.449851	4.83258	-6.44608	1.5e-09	2.76e-08	11.2593	SLC2A9	no
2025-03-03	0.300732	5.09226	6.44476	1.51e-09	2.78e-08	11.2527	2025-03-03	no
TLN1	-0.292152	9.37497	-6.44395	1.52e-09	2.78e-08	11.2486	TLN1	no
ARHGAP22	-0.512811	5.26647	-6.44208	1.53e-09	2.81e-08	11.2392	ARHGAP22	no
EPAS1	-0.661658	9.80892	-6.44098	1.54e-09	2.82e-08	11.2337	EPAS1	no
MEG3	-0.753231	6.83819	-6.43965	1.55e-09	2.84e-08	11.227	MEG3	no
RNF157	0.701939	4.82195	6.43784	1.57e-09	2.86e-08	11.2179	RNF157	no
CALM1	-0.611416	8.33578	-6.43699	1.57e-09	2.87e-08	11.2136	CALM1	no
ATP11A	0.820875	6.30503	6.43283	1.61e-09	2.93e-08	11.1927	ATP11A	no
ARHGDIA	0.484805	7.82291	6.42818	1.65e-09	2.99e-08	11.1694	ARHGDIA	no
TM4SF20	0.277106	4.63405	6.42535	1.67e-09	3.03e-08	11.1552	TM4SF20	no
DGKD	0.424487	8.50403	6.42392	1.68e-09	3.05e-08	11.148	DGKD	no
ZNF664	0.274221	6.53338	6.42278	1.69e-09	3.07e-08	11.1424	ZNF664	no
NUP210	0.322619	4.89197	6.42161	1.7e-09	3.08e-08	11.1365	NUP210	no
SLC25A45	0.593778	7.05753	6.40875	1.82e-09	3.29e-08	11.072	SLC25A45	no
ST6GALNAC2	-0.671119	5.76939	-6.40606	1.85e-09	3.33e-08	11.0586	ST6GALNAC2	no
TARS	0.41919	5.98006	6.40486	1.86e-09	3.35e-08	11.0525	TARS	no
PRC1	0.59268	5.79603	6.40204	1.88e-09	3.39e-08	11.0384	PRC1	no
ATP6V0D1	-0.493814	8.95506	-6.40069	1.9e-09	3.41e-08	11.0317	ATP6V0D1	no
PDCD2	0.357596	7.63989	6.39596	1.94e-09	3.49e-08	11.008	PDCD2	no
NT5C	-0.400963	8.98089	-6.39051	2e-09	3.59e-08	10.9808	NT5C	no
RABGGTB	0.390677	7.90474	6.38381	2.07e-09	3.71e-08	10.9472	RABGGTB	no
MAN2B1	0.523765	8.80582	6.38007	2.11e-09	3.77e-08	10.9286	MAN2B1	no
PRDM5	-0.301449	4.65226	-6.38003	2.11e-09	3.77e-08	10.9284	PRDM5	no
PLP2	-0.65054	6.92072	-6.37992	2.11e-09	3.77e-08	10.9278	PLP2	no
CXXC5	0.46255	8.17365	6.37937	2.12e-09	3.77e-08	10.9251	CXXC5	no
PCBD1	0.408866	8.76733	6.37864	2.12e-09	3.78e-08	10.9214	PCBD1	no
LY6G5C	0.583438	7.24746	6.37589	2.15e-09	3.83e-08	10.9077	LY6G5C	no
ALOX12P2	-0.888689	5.29773	-6.37583	2.15e-09	3.83e-08	10.9074	ALOX12P2	no
CNRIP1	-0.505099	7.77363	-6.37484	2.17e-09	3.84e-08	10.9024	CNRIP1	no
ANG	-0.853264	8.39191	-6.37338	2.18e-09	3.87e-08	10.8952	ANG	no
ZDHHC9	0.325285	6.0852	6.37259	2.19e-09	3.88e-08	10.8912	ZDHHC9	no
ACPP	-0.710973	12.0463	-6.36968	2.22e-09	3.93e-08	10.8767	ACPP	no
COX5A	0.51387	7.56409	6.36899	2.23e-09	3.94e-08	10.8732	COX5A	no
PAQR7	-0.549866	7.90229	-6.36618	2.26e-09	3.99e-08	10.8592	PAQR7	no
CABP4	0.648214	5.23605	6.36589	2.27e-09	4e-08	10.8578	CABP4	no
EYA4	-0.435823	5.40188	-6.36498	2.28e-09	4.01e-08	10.8532	EYA4	no
ZNF711	-0.507852	4.83112	-6.36485	2.28e-09	4.01e-08	10.8526	ZNF711	no
CAND2	-0.500692	6.44215	-6.36209	2.31e-09	4.06e-08	10.8388	CAND2	no
PLA2G12A	0.42303	7.04966	6.36182	2.32e-09	4.06e-08	10.8375	PLA2G12A	no
FAM127B	-0.329718	6.60974	-6.35813	2.36e-09	4.13e-08	10.819	FAM127B	no
TOMM40	0.577125	8.90648	6.35673	2.38e-09	4.16e-08	10.8121	TOMM40	no
MBNL2	-0.512071	8.16717	-6.35316	2.42e-09	4.23e-08	10.7943	MBNL2	no
SLC35E1	0.281325	7.97914	6.35083	2.45e-09	4.28e-08	10.7827	SLC35E1	no
TTC38	0.583481	7.19024	6.35023	2.46e-09	4.28e-08	10.7797	TTC38	no
PLAC9	-0.74782	5.78721	-6.34026	2.59e-09	4.5e-08	10.73	PLAC9	no
NGFRAP1	-0.366931	9.98019	-6.33639	2.64e-09	4.59e-08	10.7107	NGFRAP1	no
SCNN1A	-0.918111	9.81591	-6.33579	2.64e-09	4.6e-08	10.7078	SCNN1A	no
RHOJ	-0.557893	7.38409	-6.3334	2.68e-09	4.65e-08	10.6959	RHOJ	no
GIPR	-0.410008	4.40924	-6.33142	2.7e-09	4.69e-08	10.6861	GIPR	no
SNCAIP	-0.543388	7.68772	-6.3304	2.72e-09	4.71e-08	10.681	SNCAIP	no
WISP3	-0.391205	5.14699	-6.32564	2.79e-09	4.82e-08	10.6573	WISP3	no
DES	-0.758506	7.71493	-6.32046	2.86e-09	4.94e-08	10.6316	DES	no
ZNF217	0.609091	8.7399	6.317	2.91e-09	5.02e-08	10.6143	ZNF217	no
CNN1	-0.775987	10.0278	-6.31663	2.92e-09	5.03e-08	10.6125	CNN1	no
CD163L1	0.778176	5.32013	6.30892	3.03e-09	5.22e-08	10.5742	CD163L1	no
TRIB3	0.780649	5.91536	6.30874	3.04e-09	5.22e-08	10.5733	TRIB3	no
PAWR	0.338732	8.20719	6.30521	3.09e-09	5.31e-08	10.5558	PAWR	no
CD200	-0.696926	5.44843	-6.30414	3.11e-09	5.33e-08	10.5505	CD200	no
IGSF1	-0.387473	4.55945	-6.29601	3.24e-09	5.55e-08	10.5102	IGSF1	no
EDN3	-0.829752	6.06242	-6.29361	3.28e-09	5.61e-08	10.4983	EDN3	no
CDC42EP4	-0.496894	8.95461	-6.29334	3.28e-09	5.61e-08	10.4969	CDC42EP4	no
ZNF385A	-0.658271	7.62815	-6.2877	3.38e-09	5.77e-08	10.469	ZNF385A	no
CCKBR	-0.548269	4.59623	-6.2876	3.38e-09	5.77e-08	10.4685	CCKBR	no
HSPD1	0.277556	9.46782	6.28624	3.4e-09	5.8e-08	10.4617	HSPD1	no
RNF207	-0.47209	6.38283	-6.28587	3.41e-09	5.81e-08	10.4599	RNF207	no
LDB3	-0.341613	4.80817	-6.27562	3.59e-09	6.11e-08	10.4092	LDB3	no
MAL	-0.741472	6.3414	-6.27278	3.65e-09	6.19e-08	10.3951	MAL	no
PGLS	0.426617	8.52195	6.26709	3.75e-09	6.36e-08	10.367	PGLS	no
ALOX15	0.614258	4.54725	6.265	3.79e-09	6.43e-08	10.3567	ALOX15	no
GJB2	1.0626	5.84438	6.262	3.85e-09	6.52e-08	10.3418	GJB2	up
RBP7	-0.830744	7.66524	-6.26048	3.88e-09	6.56e-08	10.3343	RBP7	no
PHF21B	0.609543	6.13236	6.25847	3.92e-09	6.62e-08	10.3244	PHF21B	no
ZNF3	0.347676	6.94373	6.25649	3.96e-09	6.67e-08	10.3146	ZNF3	no
OLFML3	-0.641218	8.68395	-6.25643	3.96e-09	6.67e-08	10.3143	OLFML3	no
MRPL12	0.533359	7.34918	6.25031	4.09e-09	6.88e-08	10.2841	MRPL12	no
KCNJ5	-0.301467	4.79443	-6.24961	4.1e-09	6.89e-08	10.2806	KCNJ5	no
SDPR	-0.606689	6.03037	-6.24777	4.14e-09	6.95e-08	10.2715	SDPR	no
EHD2	-0.519105	6.43246	-6.2474	4.15e-09	6.95e-08	10.2697	EHD2	no
TTC22	-0.537614	5.48023	-6.24286	4.24e-09	7.11e-08	10.2473	TTC22	no
SEC61B	0.294516	8.68606	6.24231	4.26e-09	7.12e-08	10.2446	SEC61B	no
NRXN3	-0.39927	4.63949	-6.2415	4.27e-09	7.14e-08	10.2406	NRXN3	no
USP11	-0.592834	7.92439	-6.2386	4.34e-09	7.24e-08	10.2263	USP11	no
ARVCF	0.406381	5.80036	6.2339	4.44e-09	7.41e-08	10.2031	ARVCF	no
EXOSC5	0.457725	6.09653	6.23153	4.49e-09	7.49e-08	10.1914	EXOSC5	no
SLC8A2	-0.688972	5.60554	-6.22893	4.55e-09	7.58e-08	10.1786	SLC8A2	no
DIP2B	0.397592	6.7861	6.22873	4.56e-09	7.58e-08	10.1776	DIP2B	no
LRRC59	0.315014	5.65983	6.22723	4.59e-09	7.63e-08	10.1702	LRRC59	no
WFDC2	-0.494345	4.94866	-6.22617	4.62e-09	7.65e-08	10.165	WFDC2	no
PSAT1	0.829599	7.11546	6.22604	4.62e-09	7.65e-08	10.1644	PSAT1	no
BID	0.489293	6.09339	6.22603	4.62e-09	7.65e-08	10.1644	BID	no
ABCC3	-0.47709	5.14971	-6.22297	4.69e-09	7.76e-08	10.1492	ABCC3	no
CSPG4	-0.570243	7.8869	-6.22182	4.72e-09	7.79e-08	10.1436	CSPG4	no
CD9	-0.540139	8.37687	-6.21869	4.8e-09	7.9e-08	10.1282	CD9	no
GOLPH3	0.403991	9.83936	6.21861	4.8e-09	7.9e-08	10.1278	GOLPH3	no
PAK7	-0.179727	4.339	-6.21843	4.8e-09	7.9e-08	10.1269	PAK7	no
CASC5	0.346061	4.7003	6.21769	4.82e-09	7.92e-08	10.1232	CASC5	no
ELK4	-0.505277	9.21603	-6.21469	4.89e-09	8.04e-08	10.1085	ELK4	no
PPM1M	-0.361469	9.26713	-6.2118	4.97e-09	8.14e-08	10.0943	PPM1M	no
NCAM1	-0.59401	5.42126	-6.20879	5.04e-09	8.26e-08	10.0795	NCAM1	no
HNRNPU	-0.288903	9.88561	-6.20762	5.07e-09	8.3e-08	10.0737	HNRNPU	no
IQCA1	-0.231545	4.21541	-6.20688	5.09e-09	8.32e-08	10.0701	IQCA1	no
NRM	-0.446591	6.38237	-6.20532	5.13e-09	8.38e-08	10.0624	NRM	no
ACTC1	-1.22539	6.10426	-6.20296	5.19e-09	8.47e-08	10.0508	ACTC1	down
ZBTB7C	-0.580111	5.34451	-6.20192	5.22e-09	8.51e-08	10.0457	ZBTB7C	no
RPRM	-0.771366	8.33732	-6.20045	5.26e-09	8.56e-08	10.0385	RPRM	no
ACN9	0.52783	6.83805	6.1954	5.4e-09	8.77e-08	10.0136	ACN9	no
CBX2	0.434204	5.14007	6.18891	5.58e-09	9.05e-08	9.9818	CBX2	no
ROBO1	-0.78133	7.55701	-6.18226	5.77e-09	9.35e-08	9.94913	ROBO1	no
SLC25A12	-0.433266	7.92243	-6.18174	5.78e-09	9.37e-08	9.94662	SLC25A12	no
MAP1B	-0.556736	6.95569	-6.17864	5.87e-09	9.5e-08	9.9314	MAP1B	no
SFN	-0.930355	9.89884	-6.17695	5.92e-09	9.57e-08	9.92309	SFN	no
PLLP	-0.552084	4.94567	-6.17515	5.98e-09	9.65e-08	9.91428	PLLP	no
SOBP	-0.462672	7.00336	-6.17319	6.03e-09	9.74e-08	9.9047	SOBP	no
SLC4A11	-0.623298	5.77653	-6.17066	6.11e-09	9.85e-08	9.89227	SLC4A11	no
EDNRB	-0.710708	6.29769	-6.16811	6.19e-09	9.97e-08	9.87976	EDNRB	no
RLTPR	0.455595	4.92464	6.16751	6.21e-09	9.99e-08	9.87686	RLTPR	no
ISL1	-0.670374	9.1622	-6.16532	6.28e-09	1.01e-07	9.86613	ISL1	no
SCRIB	0.433098	9.30928	6.16389	6.32e-09	1.01e-07	9.85911	SCRIB	no
SLC6A16	-0.500791	5.972	-6.16374	6.33e-09	1.01e-07	9.85839	SLC6A16	no
CNPY2	0.383315	8.11105	6.16344	6.34e-09	1.01e-07	9.8569	CNPY2	no
PPIB	0.439192	10.4644	6.16312	6.35e-09	1.02e-07	9.85534	PPIB	no
R3HDM1	0.281436	6.37315	6.15998	6.45e-09	1.03e-07	9.83995	R3HDM1	no
APOBEC3D	-0.462515	5.27655	-6.15862	6.49e-09	1.04e-07	9.83329	APOBEC3D	no
ACSL4	-0.392195	5.41587	-6.1586	6.49e-09	1.04e-07	9.83321	ACSL4	no
CELSR2	-0.623431	5.93895	-6.15573	6.59e-09	1.05e-07	9.81915	CELSR2	no
RAP1A	-0.367601	6.82473	-6.15541	6.6e-09	1.05e-07	9.8176	RAP1A	no
ZNF75D	-0.530552	6.51055	-6.15433	6.64e-09	1.05e-07	9.81233	ZNF75D	no
ZNF750	-0.744487	6.05451	-6.15402	6.65e-09	1.06e-07	9.81078	ZNF750	no
TGFBRAP1	0.442393	7.53751	6.15327	6.67e-09	1.06e-07	9.80711	TGFBRAP1	no
ZC3H8	0.458526	6.90912	6.1517	6.72e-09	1.07e-07	9.79944	ZC3H8	no
ZNF185	-0.758721	6.55576	-6.14834	6.84e-09	1.08e-07	9.78301	ZNF185	no
NDP	-0.917058	7.48469	-6.14467	6.97e-09	1.1e-07	9.76509	NDP	no
LRRC8E	0.700134	6.77463	6.14427	6.98e-09	1.1e-07	9.76311	LRRC8E	no
LYPLA1	0.527602	8.08688	6.14374	7e-09	1.1e-07	9.76053	LYPLA1	no
MFI2	-0.372039	4.97942	-6.14145	7.08e-09	1.12e-07	9.74935	MFI2	no
FGF1	-0.249487	4.54076	-6.13729	7.23e-09	1.14e-07	9.72899	FGF1	no
DIAPH3	0.266876	4.52766	6.13177	7.43e-09	1.17e-07	9.70207	DIAPH3	no
DCBLD2	-0.439554	7.7986	-6.12941	7.52e-09	1.18e-07	9.69052	DCBLD2	no
LRCH2	-0.848542	7.84812	-6.12914	7.53e-09	1.18e-07	9.68919	LRCH2	no
GSPT1	0.390878	7.08525	6.12556	7.67e-09	1.2e-07	9.67173	GSPT1	no
RNASEL	-0.473402	6.70689	-6.12425	7.72e-09	1.21e-07	9.66535	RNASEL	no
MDC1	-0.359369	8.1805	-6.12295	7.77e-09	1.21e-07	9.65899	MDC1	no
STK39	0.539562	10.2536	6.1229	7.77e-09	1.21e-07	9.65877	STK39	no
MASP1	-0.484007	5.14512	-6.11828	7.95e-09	1.24e-07	9.63624	MASP1	no
MSMB	-1.03524	11.842	-6.11741	7.99e-09	1.25e-07	9.63198	MSMB	down
SLC25A13	0.427999	8.09755	6.11658	8.02e-09	1.25e-07	9.62794	SLC25A13	no
SEC16A	0.477818	8.07589	6.11628	8.03e-09	1.25e-07	9.6265	SEC16A	no
FBN3	-0.599374	5.38467	-6.1142	8.12e-09	1.26e-07	9.61633	FBN3	no
CHRD	0.590176	5.84534	6.11367	8.14e-09	1.26e-07	9.61377	CHRD	no
KNDC1	-0.472603	5.59642	-6.11293	8.17e-09	1.27e-07	9.61017	KNDC1	no
BSPRY	0.439051	5.23697	6.11264	8.18e-09	1.27e-07	9.60876	BSPRY	no
SHMT2	0.434593	9.77614	6.11198	8.21e-09	1.27e-07	9.60554	SHMT2	no
ENAH	-0.56575	7.2233	-6.11103	8.25e-09	1.28e-07	9.60089	ENAH	no
MAPK6	0.401709	8.10973	6.10929	8.32e-09	1.28e-07	9.59243	MAPK6	no
STIL	0.540167	7.63036	6.10877	8.34e-09	1.29e-07	9.58987	STIL	no
SLC8A1	-0.529924	6.817	-6.10516	8.49e-09	1.31e-07	9.57229	SLC8A1	no
TBC1D9B	0.279267	7.74493	6.10462	8.52e-09	1.31e-07	9.56968	TBC1D9B	no
AACS	0.536206	7.54757	6.1041	8.54e-09	1.31e-07	9.56717	AACS	no
NRIP1	0.455137	7.21373	6.10231	8.61e-09	1.32e-07	9.55845	NRIP1	no
GLI3	-0.433857	5.77565	-6.09758	8.82e-09	1.35e-07	9.53539	GLI3	no
MRPS2	0.53469	7.37622	6.09741	8.83e-09	1.35e-07	9.53459	MRPS2	no
FCGBP	-0.994664	8.72327	-6.09503	8.93e-09	1.37e-07	9.52299	FCGBP	no
ING3	0.292704	6.45354	6.09033	9.15e-09	1.4e-07	9.50013	ING3	no
GLYATL1	0.966359	5.40082	6.0898	9.17e-09	1.4e-07	9.49755	GLYATL1	no
ITPK1	-0.425204	7.97953	-6.08672	9.31e-09	1.42e-07	9.4826	ITPK1	no
PDE4D	-0.456705	8.59966	-6.08663	9.32e-09	1.42e-07	9.48214	PDE4D	no
IMPA2	0.519857	7.32621	6.08497	9.4e-09	1.43e-07	9.47411	IMPA2	no
ALKBH2	0.6117	6.2847	6.08422	9.43e-09	1.44e-07	9.47045	ALKBH2	no
BIRC5	0.353185	4.42432	6.08311	9.48e-09	1.44e-07	9.46506	BIRC5	no
RFK	0.383694	6.57025	6.08307	9.49e-09	1.44e-07	9.46484	RFK	no
GNB5	-0.309154	5.32711	-6.08233	9.52e-09	1.45e-07	9.46124	GNB5	no
GNL3	0.52473	8.3735	6.0808	9.59e-09	1.45e-07	9.45383	GNL3	no
UBE2C	0.448375	4.51741	6.07952	9.66e-09	1.46e-07	9.44759	UBE2C	no
CHTF18	0.539046	6.42854	6.07883	9.69e-09	1.47e-07	9.44426	CHTF18	no
RFX3	0.580666	6.86318	6.07777	9.74e-09	1.47e-07	9.43912	RFX3	no
CACNB1	-0.340227	5.05653	-6.07462	9.89e-09	1.49e-07	9.42379	CACNB1	no
YWHAG	0.370924	8.80384	6.07399	9.93e-09	1.5e-07	9.42078	YWHAG	no
NDN	-0.417801	10.1056	-6.06485	1.04e-08	1.57e-07	9.37642	NDN	no
NEK2	0.586098	4.97062	6.06076	1.06e-08	1.59e-07	9.35658	NEK2	no
STAC	-0.624607	5.09091	-6.06075	1.06e-08	1.59e-07	9.35654	STAC	no
ZNF219	-0.374229	7.2516	-6.0586	1.07e-08	1.61e-07	9.34609	ZNF219	no
FRAS1	-0.560483	6.45684	-6.05384	1.1e-08	1.65e-07	9.32302	FRAS1	no
ELF4	-0.678876	6.10493	-6.05087	1.11e-08	1.67e-07	9.30865	ELF4	no
ALG6	0.62298	5.84334	6.05009	1.12e-08	1.67e-07	9.30486	ALG6	no
INSIG1	-0.820706	8.31709	-6.05008	1.12e-08	1.67e-07	9.30482	INSIG1	no
TRIM17	-0.479919	5.24672	-6.04978	1.12e-08	1.67e-07	9.30336	TRIM17	no
HOXA7	-0.512062	5.86188	-6.04234	1.16e-08	1.74e-07	9.26736	HOXA7	no
LRFN5	-0.637033	6.54727	-6.04105	1.17e-08	1.75e-07	9.26111	LRFN5	no
RABIF	0.442495	6.4431	6.03563	1.2e-08	1.79e-07	9.23487	RABIF	no
HNRNPF	0.571744	7.93263	6.03474	1.21e-08	1.8e-07	9.23057	HNRNPF	no
KIF9	0.315249	5.52631	6.03325	1.22e-08	1.81e-07	9.22335	KIF9	no
LPPR1	0.503301	4.65226	6.03124	1.23e-08	1.83e-07	9.21368	LPPR1	no
ASPHD1	0.417382	4.80005	6.0291	1.24e-08	1.84e-07	9.20331	ASPHD1	no
SLC35F3	0.580297	5.00394	6.02836	1.25e-08	1.85e-07	9.19975	SLC35F3	no
PLA2G7	1.08754	9.25052	6.02769	1.25e-08	1.85e-07	9.19649	PLA2G7	up
DCAKD	-0.257629	9.80205	-6.02007	1.3e-08	1.92e-07	9.15968	DCAKD	no
HFE	-0.333187	4.6728	-6.01988	1.3e-08	1.92e-07	9.15878	HFE	no
STARD5	-0.492038	7.42507	-6.01933	1.3e-08	1.92e-07	9.1561	STARD5	no
TTLL12	0.889941	7.80365	6.01693	1.32e-08	1.95e-07	9.14451	TTLL12	no
CHRM1	-0.871242	7.12476	-6.01492	1.33e-08	1.96e-07	9.13484	CHRM1	no
MRPS18A	-0.372793	8.41233	-6.0136	1.34e-08	1.97e-07	9.12846	MRPS18A	no
MYB	0.744232	6.80613	6.00713	1.38e-08	2.04e-07	9.09724	MYB	no
RUNX2	-0.422776	5.71649	-6.00566	1.39e-08	2.05e-07	9.09015	RUNX2	no
KCNJ13	-0.560856	5.20522	-6.00455	1.4e-08	2.06e-07	9.08481	KCNJ13	no
ANO4	-0.500514	4.85991	-6.00191	1.42e-08	2.08e-07	9.0721	ANO4	no
CAPN12	-0.465151	5.22563	-6.00036	1.43e-08	2.1e-07	9.0646	CAPN12	no
KY	-0.38177	4.4962	-6.00014	1.43e-08	2.1e-07	9.06355	KY	no
CDC42BPG	-0.544808	6.64839	-5.99972	1.44e-08	2.1e-07	9.06154	CDC42BPG	no
NSUN7	0.586476	7.34532	5.99948	1.44e-08	2.1e-07	9.0604	NSUN7	no
PDLIM1	-0.469049	6.30568	-5.99896	1.44e-08	2.1e-07	9.05784	PDLIM1	no
RRP12	0.568849	5.64998	5.99195	1.49e-08	2.18e-07	9.0241	RRP12	no
SOX13	-0.353863	7.08284	-5.99058	1.5e-08	2.19e-07	9.01751	SOX13	no
CA14	-0.279778	4.26349	-5.98892	1.52e-08	2.21e-07	9.00951	CA14	no
LSS	-0.618746	7.79759	-5.98849	1.52e-08	2.21e-07	9.00743	LSS	no
NFE2L3	0.5818	6.42161	5.9838	1.55e-08	2.26e-07	8.98488	NFE2L3	no
PWWP2B	0.32145	5.37862	5.98112	1.57e-08	2.29e-07	8.97197	PWWP2B	no
PLCL1	-0.694986	6.34914	-5.98092	1.58e-08	2.29e-07	8.97102	PLCL1	no
DHRS11	0.509008	7.4542	5.98038	1.58e-08	2.29e-07	8.96844	DHRS11	no
FAM13B	-0.366264	10.2073	-5.97989	1.58e-08	2.29e-07	8.96608	FAM13B	no
PARP6	-0.638282	6.56055	-5.9789	1.59e-08	2.3e-07	8.96132	PARP6	no
IRF2	-0.497872	8.67747	-5.97843	1.6e-08	2.31e-07	8.95904	IRF2	no
FAM167A	-0.473492	4.4192	-5.97754	1.6e-08	2.31e-07	8.95477	FAM167A	no
CTHRC1	0.931682	6.44154	5.97487	1.62e-08	2.34e-07	8.94195	CTHRC1	no
GFRA1	-0.582405	5.42493	-5.97257	1.64e-08	2.37e-07	8.93087	GFRA1	no
SRR	-0.377697	7.24863	-5.97014	1.66e-08	2.39e-07	8.91923	SRR	no
LCAT	-0.416587	8.38502	-5.97003	1.66e-08	2.39e-07	8.91866	LCAT	no
ATRNL1	-0.492027	4.76585	-5.96281	1.72e-08	2.48e-07	8.884	ATRNL1	no
PYCR1	0.355785	4.7909	5.96249	1.73e-08	2.48e-07	8.88248	PYCR1	no
KLHL14	-0.310678	4.47956	-5.95934	1.75e-08	2.51e-07	8.86736	KLHL14	no
CITED4	-0.477234	6.59223	-5.95625	1.78e-08	2.55e-07	8.85253	CITED4	no
SFMBT2	-0.617533	8.42675	-5.95605	1.78e-08	2.55e-07	8.85158	SFMBT2	no
TRAF3IP2	-0.582223	6.08285	-5.95514	1.79e-08	2.56e-07	8.84719	TRAF3IP2	no
DGCR10	0.698064	5.13813	5.95492	1.79e-08	2.56e-07	8.84614	DGCR10	no
LRRN3	-0.459434	5.08489	-5.9548	1.79e-08	2.56e-07	8.84555	LRRN3	no
KIT	-0.637211	6.53294	-5.95238	1.82e-08	2.59e-07	8.83398	KIT	no
ADIPOR1	0.381568	8.71208	5.95158	1.82e-08	2.59e-07	8.83011	ADIPOR1	no
MYL6	-0.318279	11.719	-5.95056	1.83e-08	2.61e-07	8.82525	MYL6	no
PTPRN2	0.688853	7.92052	5.94802	1.85e-08	2.64e-07	8.81307	PTPRN2	no
NET1	0.433357	10.0262	5.94774	1.86e-08	2.64e-07	8.8117	NET1	no
SPTBN2	0.50315	6.44536	5.94125	1.92e-08	2.72e-07	8.78064	SPTBN2	no
RBMS1	-0.50596	8.20041	-5.94045	1.93e-08	2.73e-07	8.77678	RBMS1	no
YWHAE	0.277955	9.19025	5.93834	1.95e-08	2.75e-07	8.76666	YWHAE	no
PAXIP1	0.347021	6.92217	5.93779	1.95e-08	2.76e-07	8.76406	PAXIP1	no
CKS2	0.654333	7.35919	5.93668	1.96e-08	2.77e-07	8.75874	CKS2	no
RNF125	0.337802	5.37456	5.93644	1.96e-08	2.77e-07	8.7576	RNF125	no
GRK4	0.409862	5.20693	5.93616	1.97e-08	2.77e-07	8.75622	GRK4	no
ZNF660	-0.447741	6.18517	-5.93517	1.98e-08	2.78e-07	8.7515	ZNF660	no
PPCS	0.291387	10.8609	5.93216	2.01e-08	2.82e-07	8.73709	PPCS	no
GBP2	-0.559044	9.36602	-5.93194	2.01e-08	2.82e-07	8.73602	GBP2	no
MYH11	-0.456604	11.7608	-5.92541	2.07e-08	2.91e-07	8.70481	MYH11	no
PLEKHG3	-0.43262	6.40404	-5.9198	2.13e-08	2.99e-07	8.67798	PLEKHG3	no
AMOT	-0.27725	5.04891	-5.91899	2.14e-08	3e-07	8.67412	AMOT	no
SRPX	-0.693498	5.92402	-5.91838	2.15e-08	3.01e-07	8.6712	SRPX	no
TMEM70	0.356902	6.21348	5.91754	2.16e-08	3.02e-07	8.66718	TMEM70	no
PSIP1	-0.329886	7.99369	-5.91348	2.2e-08	3.07e-07	8.6478	PSIP1	no
SFXN3	-0.72633	7.76433	-5.91331	2.2e-08	3.07e-07	8.64696	SFXN3	no
HIST1H3B	0.677589	4.85241	5.90958	2.24e-08	3.13e-07	8.62918	HIST1H3B	no
CDCA3	0.571882	5.05102	5.9089	2.25e-08	3.14e-07	8.62591	CDCA3	no
VEPH1	-0.385676	4.61653	-5.90843	2.25e-08	3.14e-07	8.62367	VEPH1	no
TUBB3	0.928289	9.22867	5.90706	2.27e-08	3.16e-07	8.61715	TUBB3	no
IMPDH2	0.564798	9.30049	5.90702	2.27e-08	3.16e-07	8.61696	IMPDH2	no
CRIP3	-0.279164	4.44976	-5.90474	2.3e-08	3.19e-07	8.60608	CRIP3	no
PHF14	0.402598	8.23764	5.90249	2.32e-08	3.22e-07	8.59534	PHF14	no
DECR2	0.575197	5.87672	5.90114	2.34e-08	3.24e-07	8.58888	DECR2	no
GALNT1	0.418193	7.39876	5.90096	2.34e-08	3.24e-07	8.58802	GALNT1	no
PHF12	0.475555	9.21765	5.89998	2.35e-08	3.25e-07	8.58337	PHF12	no
RNF128	-0.531948	4.72677	-5.89893	2.36e-08	3.26e-07	8.57836	RNF128	no
2025-09-10	-0.445346	8.69427	-5.89882	2.36e-08	3.26e-07	8.57783	2025-09-10	no
FUCA2	0.394805	6.82094	5.89829	2.37e-08	3.27e-07	8.57529	FUCA2	no
ADM2	0.613534	7.39492	5.89539	2.4e-08	3.31e-07	8.56148	ADM2	no
ELOVL2	1.03002	6.74761	5.89523	2.41e-08	3.31e-07	8.5607	ELOVL2	up
EMILIN3	-0.529191	5.48689	-5.89489	2.41e-08	3.32e-07	8.55911	EMILIN3	no
COL6A1	-0.438657	8.83822	-5.89209	2.44e-08	3.36e-07	8.54574	COL6A1	no
SEL1L3	0.635007	7.63181	5.89001	2.47e-08	3.39e-07	8.53584	SEL1L3	no
RBMS2	-0.538269	7.2921	-5.88836	2.49e-08	3.41e-07	8.52795	RBMS2	no
NLE1	0.430905	5.01096	5.88494	2.53e-08	3.47e-07	8.51169	NLE1	no
WFDC1	-0.704207	7.24638	-5.88339	2.55e-08	3.49e-07	8.5043	WFDC1	no
PNPO	0.37453	7.61741	5.88179	2.57e-08	3.52e-07	8.49668	PNPO	no
TKT	0.394086	8.38069	5.88064	2.58e-08	3.53e-07	8.49121	TKT	no
TTLL6	0.433813	4.84248	5.87852	2.61e-08	3.57e-07	8.4811	TTLL6	no
EDNRA	-0.418845	10.8218	-5.87497	2.66e-08	3.63e-07	8.46424	EDNRA	no
PI15	-1.15186	9.16095	-5.86764	2.75e-08	3.75e-07	8.42934	PI15	down
ST14	0.535354	8.68432	5.8673	2.76e-08	3.76e-07	8.42777	ST14	no
STK33	-0.520702	6.22323	-5.86503	2.79e-08	3.8e-07	8.41695	STK33	no
PSD3	0.621047	6.80836	5.86312	2.82e-08	3.83e-07	8.40788	PSD3	no
FREM2	-0.742168	6.23862	-5.86208	2.83e-08	3.84e-07	8.40295	FREM2	no
TRHDE	-0.737552	5.39923	-5.85936	2.87e-08	3.89e-07	8.39002	TRHDE	no
BHMT2	-0.393869	5.54234	-5.85883	2.87e-08	3.9e-07	8.38753	BHMT2	no
GNG11	-0.419557	6.3809	-5.85494	2.93e-08	3.97e-07	8.36905	GNG11	no
SNTB2	-0.332272	8.30536	-5.85363	2.95e-08	3.99e-07	8.36281	SNTB2	no
MFSD3	0.49677	9.10712	5.85309	2.96e-08	4e-07	8.36028	MFSD3	no
SMTN	-0.578613	7.25641	-5.85303	2.96e-08	4e-07	8.35997	SMTN	no
ITM2B	-0.349423	9.73475	-5.85041	3e-08	4.04e-07	8.34755	ITM2B	no
NUAK1	-0.658854	7.86151	-5.84321	3.1e-08	4.19e-07	8.31338	NUAK1	no
HSD17B4	0.351134	8.92777	5.84228	3.12e-08	4.2e-07	8.30897	HSD17B4	no
TNFSF10	0.540224	8.18358	5.84189	3.12e-08	4.2e-07	8.30716	TNFSF10	no
ATG9B	0.321208	4.50027	5.84102	3.14e-08	4.22e-07	8.30303	ATG9B	no
CXCL17	-1.19732	6.2662	-5.84058	3.14e-08	4.22e-07	8.30092	CXCL17	down
OBSCN	-0.414367	4.71189	-5.83838	3.18e-08	4.27e-07	8.29052	OBSCN	no
YBX2	-0.511798	6.51953	-5.83678	3.2e-08	4.29e-07	8.28292	YBX2	no
PDCD5	0.317185	7.14635	5.83667	3.2e-08	4.29e-07	8.28239	PDCD5	no
CENPN	0.848276	8.45323	5.83397	3.25e-08	4.35e-07	8.2696	CENPN	no
PRR11	0.462749	6.69667	5.83065	3.3e-08	4.41e-07	8.25391	PRR11	no
HTRA1	-0.617175	9.28677	-5.82933	3.32e-08	4.44e-07	8.24763	HTRA1	no
BCAM	0.605118	8.68788	5.82562	3.38e-08	4.52e-07	8.2301	BCAM	no
CYP2J2	1.17558	7.17514	5.82193	3.44e-08	4.59e-07	8.21264	CYP2J2	up
ZNF8	0.367921	5.98137	5.82105	3.46e-08	4.61e-07	8.20845	ZNF8	no
ACTG2	-0.422733	11.326	-5.8197	3.48e-08	4.63e-07	8.20208	ACTG2	no
PVRL2	0.460609	8.5896	5.81957	3.48e-08	4.63e-07	8.20147	PVRL2	no
ETNK2	-0.415916	4.98045	-5.81917	3.49e-08	4.64e-07	8.19956	ETNK2	no
RABEP2	0.585709	7.21156	5.81915	3.49e-08	4.64e-07	8.19947	RABEP2	no
CENPF	0.584662	5.04551	5.81563	3.55e-08	4.71e-07	8.18284	CENPF	no
CYP27A1	-0.728736	6.76466	-5.81299	3.6e-08	4.77e-07	8.17036	CYP27A1	no
ZFP36L2	-0.370101	9.32698	-5.8019	3.8e-08	5.03e-07	8.118	ZFP36L2	no
BNIP3L	-0.406906	9.50677	-5.80162	3.8e-08	5.03e-07	8.11668	BNIP3L	no
APOBEC3F	-0.426646	6.2653	-5.80144	3.8e-08	5.03e-07	8.11579	APOBEC3F	no
DNAJC5	0.448949	7.08672	5.79884	3.85e-08	5.09e-07	8.10354	DNAJC5	no
ERN2	-0.97935	6.32732	-5.79502	3.92e-08	5.18e-07	8.08551	ERN2	no
LILRB4	0.486026	5.30681	5.79375	3.95e-08	5.21e-07	8.07953	LILRB4	no
SCRN1	-0.713022	8.47006	-5.79197	3.98e-08	5.25e-07	8.07113	SCRN1	no
TRIM23	-0.338724	6.24493	-5.79114	4e-08	5.27e-07	8.06723	TRIM23	no
RPP40	0.343938	8.15821	5.78942	4.03e-08	5.3e-07	8.05913	RPP40	no
DLL3	0.392652	4.46093	5.78892	4.04e-08	5.31e-07	8.05675	DLL3	no
LIX1	-0.871512	5.64826	-5.7877	4.07e-08	5.34e-07	8.05099	LIX1	no
RAD54L	0.20668	5.05281	5.78174	4.19e-08	5.49e-07	8.02292	RAD54L	no
SSH3	-0.460362	7.30487	-5.78077	4.21e-08	5.51e-07	8.01836	SSH3	no
FAM69B	0.487035	7.34489	5.77808	4.26e-08	5.58e-07	8.0057	FAM69B	no
HLA-DMB	0.921593	10.0066	5.77652	4.29e-08	5.62e-07	7.99834	HLA-DMB	no
TIMP4	-0.729676	5.38868	-5.77333	4.36e-08	5.7e-07	7.98336	TIMP4	no
AKR1A1	0.287113	9.04358	5.77293	4.37e-08	5.7e-07	7.98145	AKR1A1	no
DDB2	-0.517274	6.92682	-5.77291	4.37e-08	5.7e-07	7.98138	DDB2	no
CCDC112	0.229585	4.70768	5.77278	4.37e-08	5.7e-07	7.98075	CCDC112	no
TSTA3	0.52516	7.76851	5.76887	4.46e-08	5.8e-07	7.96234	TSTA3	no
SDS	0.686996	5.68856	5.76852	4.46e-08	5.81e-07	7.9607	SDS	no
TC2N	0.473848	7.90375	5.76735	4.49e-08	5.84e-07	7.9552	TC2N	no
RBBP8	-0.574931	6.87669	-5.76347	4.57e-08	5.94e-07	7.93696	RBBP8	no
NCBP2	0.313246	8.00098	5.7631	4.58e-08	5.95e-07	7.93523	NCBP2	no
PEX10	0.650781	7.39872	5.76238	4.6e-08	5.96e-07	7.93184	PEX10	no
HIST1H2BM	0.60519	5.6791	5.76213	4.6e-08	5.97e-07	7.93067	HIST1H2BM	no
RASD2	-0.530625	9.90682	-5.76145	4.62e-08	5.98e-07	7.92748	RASD2	no
ZMYND19	0.461759	8.62342	5.76106	4.63e-08	5.98e-07	7.92566	ZMYND19	no
ATOH8	-0.584183	6.28217	-5.76104	4.63e-08	5.98e-07	7.92552	ATOH8	no
RHOB	-0.438472	8.74827	-5.76054	4.64e-08	5.99e-07	7.92319	RHOB	no
PAFAH1B1	-0.281682	7.96192	-5.75968	4.66e-08	6.01e-07	7.91914	PAFAH1B1	no
MAP2K1	0.360522	9.05227	5.75947	4.66e-08	6.01e-07	7.91815	MAP2K1	no
LMOD1	-0.704815	9.12684	-5.75817	4.69e-08	6.04e-07	7.91206	LMOD1	no
DDX54	0.515077	6.4947	5.75638	4.73e-08	6.09e-07	7.90368	DDX54	no
HIVEP3	0.447288	5.36348	5.7559	4.74e-08	6.1e-07	7.90139	HIVEP3	no
VPS54	0.387139	7.91568	5.75451	4.78e-08	6.14e-07	7.89487	VPS54	no
ALDH1A2	-0.715466	7.72376	-5.75304	4.81e-08	6.18e-07	7.88795	ALDH1A2	no
RNF152	-0.699969	7.39378	-5.75131	4.85e-08	6.22e-07	7.87983	RNF152	no
ARHGEF17	-0.419386	8.10759	-5.74777	4.94e-08	6.32e-07	7.86323	ARHGEF17	no
SH3PXD2B	-0.312217	5.05671	-5.74541	4.99e-08	6.39e-07	7.85215	SH3PXD2B	no
CA4	-0.699525	7.29669	-5.74531	4.99e-08	6.39e-07	7.85171	CA4	no
INTS5	0.333834	7.84621	5.74331	5.04e-08	6.45e-07	7.84233	INTS5	no
YEATS4	0.579111	6.86691	5.74293	5.05e-08	6.45e-07	7.84055	YEATS4	no
MRPS7	0.522802	7.34026	5.74293	5.05e-08	6.45e-07	7.84054	MRPS7	no
LPP	-0.29457	10.7068	-5.73932	5.14e-08	6.55e-07	7.82361	LPP	no
GNAZ	-0.369462	5.28757	-5.73802	5.17e-08	6.59e-07	7.8175	GNAZ	no
CADM1	0.608358	9.04772	5.73759	5.18e-08	6.6e-07	7.8155	CADM1	no
SHANK2	0.424818	7.45443	5.73367	5.28e-08	6.72e-07	7.79715	SHANK2	no
HEY2	0.765052	6.87356	5.73313	5.3e-08	6.73e-07	7.7946	HEY2	no
ILVBL	-0.325878	7.99152	-5.73249	5.31e-08	6.75e-07	7.79159	ILVBL	no
CRISP3	2.18982	6.48707	5.73225	5.32e-08	6.75e-07	7.79048	CRISP3	up
RBM15B	0.47464	7.68604	5.731	5.35e-08	6.78e-07	7.78462	RBM15B	no
DAAM2	-0.551137	6.71654	-5.72962	5.39e-08	6.82e-07	7.77815	DAAM2	no
METTL9	0.343527	7.15338	5.72862	5.41e-08	6.85e-07	7.77348	METTL9	no
MAF	-0.533681	7.18767	-5.72778	5.44e-08	6.87e-07	7.76954	MAF	no
METTL7A	-0.457008	8.89605	-5.7263	5.47e-08	6.91e-07	7.76262	METTL7A	no
GMNN	-1.00705	7.7618	-5.72375	5.54e-08	6.99e-07	7.75066	GMNN	down
LRRIQ1	0.491117	4.89116	5.72293	5.56e-08	7.02e-07	7.74682	LRRIQ1	no
EML5	-0.819109	6.00177	-5.71942	5.66e-08	7.13e-07	7.73042	EML5	no
KIAA1804	0.57374	6.70242	5.71673	5.73e-08	7.22e-07	7.71783	KIAA1804	no
CNKSR3	0.469023	6.25872	5.71288	5.84e-08	7.35e-07	7.69983	CNKSR3	no
JAK2	-0.371889	6.60867	-5.7123	5.86e-08	7.36e-07	7.69715	JAK2	no
ADAMTS1	-1.02756	7.44504	-5.71022	5.92e-08	7.43e-07	7.68741	ADAMTS1	down
SMAD3	-0.388252	7.59018	-5.70991	5.93e-08	7.43e-07	7.68595	SMAD3	no
GAA	0.525907	8.68813	5.70987	5.93e-08	7.43e-07	7.68578	GAA	no
HIST1H2AK	0.46204	5.49751	5.70814	5.98e-08	7.48e-07	7.67769	HIST1H2AK	no
ALDH4A1	-0.40946	8.79615	-5.70723	6e-08	7.51e-07	7.67344	ALDH4A1	no
DBI	-0.503466	9.53697	-5.70643	6.03e-08	7.53e-07	7.66973	DBI	no
PRMT2	-0.314057	7.65462	-5.70638	6.03e-08	7.53e-07	7.66948	PRMT2	no
RNF175	-0.570149	5.47884	-5.7048	6.07e-08	7.58e-07	7.66212	RNF175	no
LYST	-0.374065	5.89231	-5.7047	6.08e-08	7.58e-07	7.66165	LYST	no
APEX1	0.325479	9.82047	5.70442	6.08e-08	7.58e-07	7.66033	APEX1	no
TMEM19	-0.403253	6.1852	-5.70415	6.09e-08	7.58e-07	7.65907	TMEM19	no
SNRPF	0.445743	7.32894	5.70352	6.11e-08	7.6e-07	7.65612	SNRPF	no
SCYL3	0.378332	7.27023	5.70324	6.12e-08	7.6e-07	7.65482	SCYL3	no
SULT1A1	0.357465	6.39876	5.70321	6.12e-08	7.6e-07	7.65465	SULT1A1	no
PPP1R3B	-0.45024	7.20534	-5.70167	6.17e-08	7.65e-07	7.64747	PPP1R3B	no
PTGS1	-0.618128	5.61455	-5.70055	6.2e-08	7.69e-07	7.64226	PTGS1	no
LRRTM4	-0.626592	5.24282	-5.69971	6.22e-08	7.71e-07	7.63835	LRRTM4	no
SHROOM3	0.61434	7.20338	5.69885	6.25e-08	7.74e-07	7.63433	SHROOM3	no
CDKN1C	-0.331779	5.13789	-5.69678	6.31e-08	7.81e-07	7.62465	CDKN1C	no
CMIP	-0.46512	9.22949	-5.69443	6.38e-08	7.89e-07	7.61368	CMIP	no
PCYOX1L	0.477828	6.33971	5.69378	6.4e-08	7.91e-07	7.61067	PCYOX1L	no
SCUBE3	-0.523495	5.58366	-5.69201	6.46e-08	7.96e-07	7.60241	SCUBE3	no
HOXC5	0.361851	4.36235	5.69197	6.46e-08	7.96e-07	7.60224	HOXC5	no
B4GALNT4	0.382892	4.97348	5.69131	6.48e-08	7.98e-07	7.59916	B4GALNT4	no
DSC2	0.618139	7.55106	5.69041	6.51e-08	8.01e-07	7.59496	DSC2	no
AGPAT1	-0.350308	6.6217	-5.68888	6.56e-08	8.06e-07	7.58781	AGPAT1	no
RTKN2	0.303529	4.75821	5.68687	6.62e-08	8.13e-07	7.57846	RTKN2	no
RECQL4	-0.677171	5.39702	-5.68394	6.71e-08	8.24e-07	7.56482	RECQL4	no
SLC38A11	1.14211	6.62501	5.6838	6.72e-08	8.24e-07	7.56415	SLC38A11	up
GPD1L	-0.702376	9.86518	-5.68285	6.75e-08	8.27e-07	7.55971	GPD1L	no
TPX2	0.78524	5.15333	5.68151	6.79e-08	8.32e-07	7.55347	TPX2	no
PRKAR1B	-0.420651	6.22609	-5.681	6.81e-08	8.33e-07	7.55109	PRKAR1B	no
ANO1	-0.509117	6.20709	-5.68015	6.84e-08	8.35e-07	7.54712	ANO1	no
TAGLN	-0.499269	10.1487	-5.68011	6.84e-08	8.35e-07	7.54697	TAGLN	no
HIST1H2BK	0.555987	9.19974	5.67521	7e-08	8.55e-07	7.52414	HIST1H2BK	no
PM20D2	0.468083	7.31814	5.67383	7.05e-08	8.6e-07	7.51771	PM20D2	no
CBS	0.59908	10.5227	5.67358	7.06e-08	8.6e-07	7.51656	CBS	no
ID2	-0.623087	8.25881	-5.67209	7.11e-08	8.65e-07	7.50964	ID2	no
ADAM28	-0.495369	5.38741	-5.67187	7.12e-08	8.66e-07	7.50859	ADAM28	no
SYPL1	-0.397637	9.05602	-5.67101	7.14e-08	8.68e-07	7.50458	SYPL1	no
MYO10	0.402274	8.13242	5.66816	7.24e-08	8.79e-07	7.49136	MYO10	no
MRPL42	0.380253	7.91565	5.66805	7.25e-08	8.79e-07	7.49084	MRPL42	no
FERMT2	-0.58463	9.32466	-5.66709	7.28e-08	8.83e-07	7.48637	FERMT2	no
ACSS3	-0.609889	5.25862	-5.66424	7.38e-08	8.94e-07	7.47314	ACSS3	no
TMEM44	0.435817	5.98586	5.6601	7.53e-08	9.11e-07	7.45389	TMEM44	no
KIAA1958	0.503516	6.71772	5.65858	7.58e-08	9.17e-07	7.44682	KIAA1958	no
HOMER1	0.475563	5.78187	5.65856	7.58e-08	9.17e-07	7.44674	HOMER1	no
ZNF395	-0.366856	7.89123	-5.65813	7.6e-08	9.18e-07	7.44474	ZNF395	no
VBP1	0.397292	9.35184	5.65659	7.66e-08	9.24e-07	7.43759	VBP1	no
MIOX	0.465651	4.97956	5.65531	7.7e-08	9.29e-07	7.43164	MIOX	no
WNT4	-0.357033	5.71222	-5.65311	7.78e-08	9.38e-07	7.42142	WNT4	no
KIAA0319	-0.467243	4.80332	-5.65169	7.84e-08	9.43e-07	7.41483	KIAA0319	no
TOR1AIP1	-0.371235	8.70222	-5.64922	7.93e-08	9.54e-07	7.40334	TOR1AIP1	no
MYO19	0.378162	6.47925	5.64759	7.99e-08	9.61e-07	7.39579	MYO19	no
BRI3BP	0.449325	8.24032	5.64692	8.02e-08	9.63e-07	7.39269	BRI3BP	no
TPM2	-0.376619	10.3517	-5.64625	8.05e-08	9.65e-07	7.38957	TPM2	no
COL4A5	-0.600029	7.98987	-5.64338	8.16e-08	9.78e-07	7.37625	COL4A5	no
LRP2	-0.384384	4.74828	-5.64058	8.27e-08	9.9e-07	7.36327	LRP2	no
SFXN2	0.402173	6.34932	5.64007	8.29e-08	9.91e-07	7.36094	SFXN2	no
PDIA3	0.38116	6.57194	5.64	8.29e-08	9.91e-07	7.36058	PDIA3	no
LAMA3	-0.533251	6.11265	-5.63968	8.3e-08	9.92e-07	7.3591	LAMA3	no
SFRP4	1.11087	7.79797	5.63945	8.31e-08	9.92e-07	7.35803	SFRP4	up
MGAT4A	0.623002	6.99539	5.63781	8.38e-08	9.99e-07	7.35046	MGAT4A	no
PLEKHG5	-0.195649	4.45085	-5.63761	8.38e-08	1e-06	7.34951	PLEKHG5	no
RAB11FIP2	-0.445073	7.98365	-5.63593	8.45e-08	1.01e-06	7.34173	RAB11FIP2	no
FAM46B	-0.793388	5.59675	-5.63568	8.46e-08	1.01e-06	7.34059	FAM46B	no
RPF2	0.484608	8.86535	5.6311	8.65e-08	1.03e-06	7.31936	RPF2	no
AMMECR1	0.342591	6.51368	5.63042	8.68e-08	1.03e-06	7.31619	AMMECR1	no
ADRB1	0.706077	7.36613	5.62902	8.74e-08	1.04e-06	7.30972	ADRB1	no
EI24	0.290029	7.13986	5.62654	8.84e-08	1.05e-06	7.29823	EI24	no
ATAD3A	0.426787	6.5344	5.62284	9e-08	1.07e-06	7.28112	ATAD3A	no
SYNPO2	-0.647934	9.45696	-5.62243	9.02e-08	1.07e-06	7.27923	SYNPO2	no
RNF144A	0.483521	5.94369	5.61934	9.15e-08	1.08e-06	7.26491	RNF144A	no
MIPEP	1.19483	6.80675	5.6131	9.43e-08	1.11e-06	7.23611	MIPEP	up
PLEKHA7	0.369324	5.06122	5.61236	9.46e-08	1.12e-06	7.23269	PLEKHA7	no
TAF5L	0.319232	6.04353	5.61038	9.55e-08	1.13e-06	7.22351	TAF5L	no
MARVELD3	0.573151	6.71472	5.60979	9.58e-08	1.13e-06	7.22079	MARVELD3	no
NID1	-0.504403	7.8772	-5.6068	9.71e-08	1.15e-06	7.20696	NID1	no
TROVE2	-0.208328	10.093	-5.6061	9.75e-08	1.15e-06	7.20373	TROVE2	no
RTN4	-0.346941	10.5958	-5.60538	9.78e-08	1.15e-06	7.20041	RTN4	no
SLC25A10	0.337384	6.02163	5.60408	9.84e-08	1.16e-06	7.19442	SLC25A10	no
GARS	0.310168	8.62463	5.60243	9.92e-08	1.17e-06	7.18679	GARS	no
PPP1R12B	-0.527501	8.26434	-5.59933	1.01e-07	1.18e-06	7.1725	PPP1R12B	no
E2F2	0.447245	5.41819	5.59926	1.01e-07	1.18e-06	7.17216	E2F2	no
RILPL2	-0.417412	8.31997	-5.59873	1.01e-07	1.18e-06	7.16975	RILPL2	no
POU4F1	0.601299	4.78116	5.59819	1.01e-07	1.19e-06	7.16723	POU4F1	no
AKR1B1	-0.58237	7.10875	-5.59695	1.02e-07	1.19e-06	7.1615	AKR1B1	no
MEX3B	0.505629	5.71284	5.59211	1.04e-07	1.22e-06	7.1392	MEX3B	no
MRPL45	0.332003	8.30929	5.58733	1.07e-07	1.24e-06	7.11716	MRPL45	no
KCNS3	0.781793	6.37961	5.58729	1.07e-07	1.24e-06	7.11699	KCNS3	no
NOP14	0.430065	9.16809	5.58619	1.07e-07	1.25e-06	7.11194	NOP14	no
AGR2	1.26187	9.5832	5.58344	1.09e-07	1.27e-06	7.09925	AGR2	up
PALLD	-0.66199	9.13265	-5.58102	1.1e-07	1.28e-06	7.0881	PALLD	no
MKNK2	0.305451	8.0786	5.57743	1.12e-07	1.3e-06	7.07158	MKNK2	no
PARD6G	-0.507574	6.55903	-5.57673	1.12e-07	1.3e-06	7.06838	PARD6G	no
MRPL19	0.367276	6.53589	5.57619	1.12e-07	1.31e-06	7.06588	MRPL19	no
WDR3	0.389276	6.57956	5.57498	1.13e-07	1.31e-06	7.06032	WDR3	no
PTCHD1	-0.667272	5.8701	-5.57309	1.14e-07	1.32e-06	7.05162	PTCHD1	no
PAGE4	-1.03545	8.69457	-5.56979	1.16e-07	1.34e-06	7.03644	PAGE4	down
RNF180	-0.378398	6.83128	-5.56955	1.16e-07	1.34e-06	7.03535	RNF180	no
SLC17A1	0.287503	4.51459	5.56912	1.16e-07	1.35e-06	7.03338	SLC17A1	no
PCTP	0.577079	6.04904	5.56761	1.17e-07	1.35e-06	7.02643	PCTP	no
NLK	0.44056	7.62402	5.56312	1.2e-07	1.38e-06	7.00578	NLK	no
BEND5	-0.250794	4.5647	-5.56274	1.2e-07	1.38e-06	7.00405	BEND5	no
CPT2	0.516457	6.36632	5.55971	1.22e-07	1.4e-06	6.99009	CPT2	no
TK1	0.59764	5.66223	5.55878	1.22e-07	1.41e-06	6.98583	TK1	no
MAP7	0.490985	9.43383	5.55496	1.24e-07	1.43e-06	6.96829	MAP7	no
SGCG	-0.539321	4.82963	-5.55339	1.25e-07	1.44e-06	6.96111	SGCG	no
SLC35D2	0.360647	6.93796	5.55144	1.26e-07	1.45e-06	6.95217	SLC35D2	no
LIG3	0.364616	7.66091	5.55067	1.27e-07	1.46e-06	6.9486	LIG3	no
PTPN13	0.387098	7.56703	5.54767	1.29e-07	1.48e-06	6.93487	PTPN13	no
MTSS1	-0.454991	7.67536	-5.54706	1.29e-07	1.48e-06	6.93205	MTSS1	no
BBX	-0.391687	8.20243	-5.54593	1.3e-07	1.49e-06	6.92687	BBX	no
CLPB	0.364511	5.33699	5.54555	1.3e-07	1.49e-06	6.92513	CLPB	no
OLR1	0.597561	5.15394	5.54366	1.31e-07	1.5e-06	6.91646	OLR1	no
CDC42EP3	-0.475193	10.7318	-5.54323	1.31e-07	1.5e-06	6.91451	CDC42EP3	no
DHFR	0.477723	6.75788	5.54235	1.32e-07	1.51e-06	6.91047	DHFR	no
PLEKHA3	-0.293689	8.35945	-5.5417	1.32e-07	1.51e-06	6.9075	PLEKHA3	no
TPRXL	-0.228729	4.19487	-5.54117	1.33e-07	1.51e-06	6.90508	TPRXL	no
NKAIN1	0.826324	4.83522	5.5402	1.33e-07	1.52e-06	6.90062	NKAIN1	no
SGSM3	0.398052	7.08093	5.53938	1.34e-07	1.53e-06	6.89686	SGSM3	no
SLITRK6	-0.633598	5.21169	-5.53874	1.34e-07	1.53e-06	6.89394	SLITRK6	no
NDRG4	-0.670397	5.20454	-5.53694	1.35e-07	1.54e-06	6.88568	NDRG4	no
FOXA1	0.424855	10.6765	5.53279	1.38e-07	1.57e-06	6.86668	FOXA1	no
SNX21	-0.315373	6.27083	-5.52782	1.41e-07	1.61e-06	6.84393	SNX21	no
UCHL1	-0.71684	7.05548	-5.52772	1.41e-07	1.61e-06	6.84348	UCHL1	no
RND3	-0.726298	6.66577	-5.52759	1.41e-07	1.61e-06	6.84288	RND3	no
TCF21	-0.540553	8.02988	-5.5234	1.44e-07	1.64e-06	6.82369	TCF21	no
DEAF1	0.358638	5.63352	5.5219	1.45e-07	1.65e-06	6.81683	DEAF1	no
ARMC6	0.318795	5.13589	5.5198	1.47e-07	1.66e-06	6.80724	ARMC6	no
SRGAP3	-0.270566	4.65032	-5.51838	1.48e-07	1.67e-06	6.80078	SRGAP3	no
XPOT	0.375357	8.36306	5.51787	1.48e-07	1.67e-06	6.7984	XPOT	no
AIFM1	0.439051	7.19426	5.51412	1.51e-07	1.7e-06	6.78129	AIFM1	no
PRICKLE1	-0.377035	9.89671	-5.51352	1.51e-07	1.71e-06	6.77854	PRICKLE1	no
PRKAA2	0.418169	5.7482	5.51041	1.53e-07	1.73e-06	6.76433	PRKAA2	no
RGL2	0.513869	9.05591	5.50985	1.54e-07	1.73e-06	6.76177	RGL2	no
ITGA1	-0.500876	8.4814	-5.50811	1.55e-07	1.75e-06	6.75384	ITGA1	no
TUBA1C	0.29495	10.7844	5.50573	1.57e-07	1.77e-06	6.74301	TUBA1C	no
BMP1	-0.276039	6.12012	-5.50075	1.61e-07	1.81e-06	6.72029	BMP1	no
RET	0.953069	6.19601	5.49958	1.61e-07	1.81e-06	6.71495	RET	no
FKBP9	-0.403999	8.81088	-5.49934	1.62e-07	1.82e-06	6.71383	FKBP9	no
SIK1	-0.753383	6.93154	-5.49777	1.63e-07	1.83e-06	6.70669	SIK1	no
PDK4	-0.871	6.01689	-5.49513	1.65e-07	1.85e-06	6.69465	PDK4	no
DEPDC1B	0.26046	4.43853	5.49494	1.65e-07	1.85e-06	6.69376	DEPDC1B	no
NPY6R	-0.579758	5.00057	-5.49277	1.67e-07	1.87e-06	6.6839	NPY6R	no
FEN1	0.364587	6.8621	5.49229	1.67e-07	1.87e-06	6.68172	FEN1	no
MCAT	0.519418	5.8845	5.49173	1.68e-07	1.87e-06	6.67913	MCAT	no
LAYN	-0.343662	5.54314	-5.48988	1.69e-07	1.89e-06	6.67071	LAYN	no
LRTOMT	0.312252	7.39396	5.48967	1.69e-07	1.89e-06	6.66977	LRTOMT	no
RPL23A	0.238975	10.9343	5.48759	1.71e-07	1.91e-06	6.66027	RPL23A	no
PRDX4	0.756646	8.62318	5.48217	1.75e-07	1.95e-06	6.63564	PRDX4	no
ANPEP	-1.23732	7.99789	-5.48107	1.76e-07	1.96e-06	6.6306	ANPEP	down
RPF1	0.267287	5.63462	5.47854	1.78e-07	1.98e-06	6.61911	RPF1	no
SPRED1	-0.441861	8.70961	-5.4783	1.78e-07	1.98e-06	6.61802	SPRED1	no
EIF4EBP2	-0.297105	9.74137	-5.47824	1.79e-07	1.98e-06	6.61776	EIF4EBP2	no
KDR	-0.653243	7.46415	-5.47574	1.81e-07	2.01e-06	6.60638	KDR	no
EML4	0.3752	7.12782	5.47373	1.82e-07	2.02e-06	6.59722	EML4	no
FOXD1	0.737794	4.62814	5.47286	1.83e-07	2.03e-06	6.59328	FOXD1	no
COX7A1	-0.554244	8.66043	-5.47109	1.85e-07	2.05e-06	6.58524	COX7A1	no
DCN	-0.396407	10.0723	-5.46822	1.87e-07	2.07e-06	6.57218	DCN	no
ZNF827	-0.548726	11.3491	-5.46406	1.91e-07	2.11e-06	6.5533	ZNF827	no
SLC39A2	-0.895337	4.64708	-5.45987	1.95e-07	2.15e-06	6.53429	SLC39A2	no
ZNF165	0.519601	6.10281	5.45758	1.97e-07	2.17e-06	6.52389	ZNF165	no
FXYD6	-0.731334	7.97438	-5.4551	1.99e-07	2.2e-06	6.51265	FXYD6	no
CHAD	-0.220501	4.38162	-5.45148	2.02e-07	2.23e-06	6.49621	CHAD	no
AVL9	0.282866	6.64052	5.44919	2.05e-07	2.26e-06	6.48584	AVL9	no
ATP6V0A4	-0.285885	4.20004	-5.44604	2.08e-07	2.29e-06	6.47155	ATP6V0A4	no
ASIP	-0.466938	5.94522	-5.44603	2.08e-07	2.29e-06	6.47155	ASIP	no
ENTPD7	0.312581	6.57304	5.44536	2.08e-07	2.29e-06	6.46847	ENTPD7	no
DARS2	0.502586	7.82962	5.44455	2.09e-07	2.3e-06	6.46484	DARS2	no
GDPD1	0.499744	5.3016	5.44175	2.12e-07	2.33e-06	6.45212	GDPD1	no
POLR2B	0.235286	7.14809	5.4411	2.13e-07	2.33e-06	6.4492	POLR2B	no
PPA1	0.464577	10.045	5.44008	2.14e-07	2.34e-06	6.44458	PPA1	no
TBL1X	-0.22909	10.7557	-5.43871	2.15e-07	2.35e-06	6.43838	TBL1X	no
PHF8	0.299217	6.33131	5.43871	2.15e-07	2.35e-06	6.43837	PHF8	no
MAPKAPK3	0.408278	10.4953	5.43503	2.19e-07	2.39e-06	6.42173	MAPKAPK3	no
FOXI1	-0.360401	4.3186	-5.43404	2.2e-07	2.4e-06	6.41724	FOXI1	no
PCDHGA3	0.46234	6.11915	5.43162	2.22e-07	2.43e-06	6.40629	PCDHGA3	no
SORBS1	-0.436701	9.16601	-5.43076	2.23e-07	2.44e-06	6.40239	SORBS1	no
MEOX1	0.615895	5.00604	5.43017	2.24e-07	2.44e-06	6.39973	MEOX1	no
TRIM11	0.23794	7.02497	5.42923	2.25e-07	2.45e-06	6.39548	TRIM11	no
MAGI2	-0.42345	5.71751	-5.42413	2.3e-07	2.51e-06	6.37243	MAGI2	no
GNE	0.564407	6.41174	5.42371	2.31e-07	2.51e-06	6.37056	GNE	no
CDKN3	0.445745	4.62121	5.42334	2.31e-07	2.51e-06	6.36886	CDKN3	no
TRIM68	0.744409	6.07215	5.42309	2.31e-07	2.51e-06	6.36775	TRIM68	no
CEP68	-0.332675	6.02035	-5.41971	2.35e-07	2.55e-06	6.35247	CEP68	no
EPHB1	-0.492087	4.90126	-5.41967	2.35e-07	2.55e-06	6.35227	EPHB1	no
DGKE	-0.356382	7.10205	-5.41958	2.35e-07	2.55e-06	6.35187	DGKE	no
GFRA2	-0.38825	5.44675	-5.41833	2.36e-07	2.56e-06	6.34624	GFRA2	no
LAMB1	-0.489928	7.25343	-5.4182	2.37e-07	2.56e-06	6.34567	LAMB1	no
PVRL3	0.708374	8.60843	5.41594	2.39e-07	2.59e-06	6.33543	PVRL3	no
CXCL14	1.19024	7.38141	5.41357	2.42e-07	2.61e-06	6.32475	CXCL14	up
FHOD3	-0.75537	7.22622	-5.41202	2.43e-07	2.63e-06	6.31777	FHOD3	no
NCL	0.213627	7.74827	5.41082	2.45e-07	2.64e-06	6.31236	NCL	no
WSB2	0.463761	9.25605	5.40827	2.48e-07	2.67e-06	6.30085	WSB2	no
PAOX	0.466901	7.88482	5.40707	2.49e-07	2.69e-06	6.29543	PAOX	no
KCNB1	-0.396172	5.63156	-5.40673	2.5e-07	2.69e-06	6.2939	KCNB1	no
DSE	-0.328762	6.34563	-5.40611	2.5e-07	2.69e-06	6.29111	DSE	no
SPATA18	-0.552215	4.86873	-5.40253	2.55e-07	2.74e-06	6.27495	SPATA18	no
BCAS4	-0.278722	6.72116	-5.40164	2.56e-07	2.75e-06	6.27097	BCAS4	no
GSTM5	-0.832346	7.00846	-5.4004	2.57e-07	2.76e-06	6.26538	GSTM5	no
VANGL2	-0.568344	6.78385	-5.39911	2.59e-07	2.78e-06	6.25956	VANGL2	no
PIP5K1B	-0.285375	4.82596	-5.39803	2.6e-07	2.79e-06	6.25471	PIP5K1B	no
NINL	-0.865397	6.25413	-5.39794	2.6e-07	2.79e-06	6.25427	NINL	no
RCC1	0.530038	6.20424	5.39703	2.61e-07	2.8e-06	6.25019	RCC1	no
TTC36	0.578123	5.06561	5.39478	2.64e-07	2.82e-06	6.24007	TTC36	no
TXLNB	0.43534	4.75734	5.39473	2.64e-07	2.82e-06	6.23984	TXLNB	no
SLC25A33	0.550658	6.21202	5.39191	2.67e-07	2.86e-06	6.22715	SLC25A33	no
LPGAT1	-0.361061	7.31009	-5.3912	2.68e-07	2.87e-06	6.22395	LPGAT1	no
GUSB	0.450662	8.51378	5.39098	2.69e-07	2.87e-06	6.22297	GUSB	no
ANO5	-0.647695	5.75465	-5.39023	2.7e-07	2.87e-06	6.21958	ANO5	no
DPP3	0.392341	7.08912	5.39006	2.7e-07	2.87e-06	6.21881	DPP3	no
RPRML	0.854309	4.99014	5.38714	2.73e-07	2.91e-06	6.20566	RPRML	no
PTGIS	-0.63407	7.08551	-5.38533	2.76e-07	2.93e-06	6.19756	PTGIS	no
NOLC1	0.396326	7.76252	5.38491	2.76e-07	2.94e-06	6.19564	NOLC1	no
MAMLD1	-0.368122	5.30666	-5.38114	2.81e-07	2.99e-06	6.1787	MAMLD1	no
ZNF174	0.338872	6.87174	5.37981	2.83e-07	3e-06	6.17275	ZNF174	no
PCCB	0.4539	8.23981	5.37959	2.83e-07	3.01e-06	6.17175	PCCB	no
MC5R	-0.298496	4.87203	-5.37795	2.85e-07	3.03e-06	6.16439	MC5R	no
TOR1B	0.444	7.68312	5.37672	2.87e-07	3.04e-06	6.15883	TOR1B	no
CLU	-0.411859	5.78388	-5.37514	2.89e-07	3.06e-06	6.15173	CLU	no
LSM11	-0.358741	8.76582	-5.3732	2.92e-07	3.09e-06	6.14306	LSM11	no
GPR37	0.484006	5.11408	5.36983	2.96e-07	3.13e-06	6.1279	GPR37	no
GCHFR	-0.594635	6.14879	-5.36905	2.97e-07	3.14e-06	6.12441	GCHFR	no
DENND1A	0.235084	4.6156	5.36721	3e-07	3.17e-06	6.11616	DENND1A	no
SNORA71A	0.42984	7.77903	5.36592	3.02e-07	3.18e-06	6.11038	SNORA71A	no
MOGAT1	0.316691	4.44916	5.3656	3.02e-07	3.19e-06	6.10893	MOGAT1	no
PCDHGA4	0.79765	5.54158	5.36417	3.04e-07	3.21e-06	6.1025	PCDHGA4	no
2025-09-03	0.629369	5.53291	5.36369	3.05e-07	3.21e-06	6.10036	2025-09-03	no
DISC1	0.326014	5.22831	5.36295	3.06e-07	3.22e-06	6.09702	DISC1	no
LYPD1	0.254466	4.42514	5.36158	3.08e-07	3.24e-06	6.09089	LYPD1	no
IMPDH1	0.352555	5.84577	5.36029	3.1e-07	3.25e-06	6.0851	IMPDH1	no
TMEM51	-0.376278	8.13393	-5.35999	3.1e-07	3.26e-06	6.08378	TMEM51	no
TXNL4A	0.412173	6.22947	5.35927	3.11e-07	3.27e-06	6.08055	TXNL4A	no
NSF	0.317075	6.74393	5.35862	3.12e-07	3.27e-06	6.07763	NSF	no
FBLN1	-0.395638	9.53441	-5.35755	3.14e-07	3.29e-06	6.07286	FBLN1	no
ARL10	-0.316006	5.63127	-5.35545	3.17e-07	3.32e-06	6.06344	ARL10	no
ADPGK	0.537688	7.57414	5.35423	3.19e-07	3.33e-06	6.05794	ADPGK	no
DNER	-0.784835	5.20553	-5.35355	3.2e-07	3.34e-06	6.05493	DNER	no
PXDN	0.506115	7.71892	5.35307	3.2e-07	3.35e-06	6.05277	PXDN	no
PRB3	0.591133	5.20053	5.35289	3.21e-07	3.35e-06	6.05194	PRB3	no
TEAD4	0.652707	6.98648	5.34996	3.25e-07	3.39e-06	6.03882	TEAD4	no
SMPD2	0.511412	6.27005	5.3451	3.32e-07	3.47e-06	6.01709	SMPD2	no
SNORA71B	0.368909	8.54354	5.34348	3.35e-07	3.49e-06	6.00983	SNORA71B	no
ANKS3	0.40908	6.00656	5.34313	3.35e-07	3.49e-06	6.00827	ANKS3	no
THPO	0.243197	4.36361	5.34083	3.39e-07	3.53e-06	5.998	THPO	no
SRD5A1	0.447138	5.66828	5.33919	3.42e-07	3.55e-06	5.99067	SRD5A1	no
PHYHIP	-0.320242	4.45377	-5.3369	3.45e-07	3.59e-06	5.98041	PHYHIP	no
CYP4Z1	-0.219163	4.2861	-5.33534	3.48e-07	3.61e-06	5.97346	CYP4Z1	no
SCN7A	-0.63386	7.0673	-5.33357	3.51e-07	3.64e-06	5.96555	SCN7A	no
GPC2	0.409909	5.79176	5.33178	3.53e-07	3.67e-06	5.95754	GPC2	no
NIT2	0.340939	7.21461	5.32888	3.58e-07	3.71e-06	5.94458	NIT2	no
OLFML1	-0.510439	7.30719	-5.32581	3.63e-07	3.76e-06	5.9309	OLFML1	no
ZNF488	-0.276084	4.37336	-5.32531	3.64e-07	3.77e-06	5.92864	ZNF488	no
HES6	0.540202	5.80482	5.32332	3.68e-07	3.8e-06	5.91979	HES6	no
LFNG	0.482606	8.27065	5.32295	3.68e-07	3.8e-06	5.91811	LFNG	no
GMPR	-0.720929	8.28055	-5.3206	3.72e-07	3.84e-06	5.90763	GMPR	no
ISCU	-0.226381	9.997	-5.32052	3.72e-07	3.84e-06	5.90729	ISCU	no
SEC61A1	0.328608	10.6369	5.31999	3.73e-07	3.85e-06	5.90494	SEC61A1	no
PPP3CC	-0.503627	6.87156	-5.31845	3.76e-07	3.87e-06	5.89806	PPP3CC	no
PLCD1	-0.386889	5.98498	-5.31195	3.87e-07	3.99e-06	5.86909	PLCD1	no
OGN	-0.712849	7.62903	-5.30974	3.91e-07	4.03e-06	5.85923	OGN	no
MTG1	0.448525	6.77518	5.30963	3.92e-07	4.03e-06	5.85875	MTG1	no
ANGEL1	0.304786	5.99901	5.30946	3.92e-07	4.03e-06	5.85798	ANGEL1	no
EBF2	0.393279	4.52781	5.3078	3.95e-07	4.05e-06	5.85061	EBF2	no
FANCF	0.425516	6.32062	5.30699	3.96e-07	4.07e-06	5.84699	FANCF	no
ABCA2	0.258603	5.17139	5.30616	3.98e-07	4.08e-06	5.84331	ABCA2	no
SLC27A3	-0.439796	7.09721	-5.30546	3.99e-07	4.09e-06	5.84017	SLC27A3	no
SCML1	-0.456687	6.53044	-5.30389	4.02e-07	4.12e-06	5.83318	SCML1	no
RPS6KA4	0.373091	5.01063	5.30353	4.03e-07	4.12e-06	5.83159	RPS6KA4	no
PAQR8	-0.489037	6.28742	-5.30337	4.03e-07	4.12e-06	5.83086	PAQR8	no
KRT4	-0.591863	4.53475	-5.30304	4.04e-07	4.12e-06	5.82939	KRT4	no
GLIS3	-0.446977	5.28249	-5.30277	4.04e-07	4.13e-06	5.82822	GLIS3	no
RNMTL1	0.391366	9.8646	5.30197	4.06e-07	4.14e-06	5.82465	RNMTL1	no
GEMIN4	0.559136	6.22136	5.30138	4.07e-07	4.15e-06	5.82203	GEMIN4	no
KIAA0087	0.649663	4.59246	5.30117	4.07e-07	4.15e-06	5.8211	KIAA0087	no
VPS13A	0.376808	6.71393	5.30089	4.08e-07	4.15e-06	5.81982	VPS13A	no
PKP1	-0.947748	6.45032	-5.29983	4.1e-07	4.17e-06	5.81513	PKP1	no
TICAM1	0.380089	6.62746	5.29782	4.13e-07	4.2e-06	5.80618	TICAM1	no
CAPNS2	-0.596167	4.44352	-5.29731	4.14e-07	4.21e-06	5.80391	CAPNS2	no
UPK3A	-0.638981	5.70796	-5.2968	4.15e-07	4.22e-06	5.80167	UPK3A	no
KLK12	0.813714	5.11419	5.29477	4.19e-07	4.26e-06	5.79264	KLK12	no
TRPV4	-0.200306	4.44805	-5.2905	4.28e-07	4.34e-06	5.77366	TRPV4	no
CCT8	0.247087	9.88637	5.28934	4.3e-07	4.36e-06	5.76847	CCT8	no
HUWE1	-0.261235	9.91096	-5.28848	4.32e-07	4.37e-06	5.76469	HUWE1	no
ADAM2	0.623076	4.59642	5.28823	4.32e-07	4.37e-06	5.76357	ADAM2	no
LYNX1	-0.305686	5.12211	-5.28559	4.37e-07	4.42e-06	5.75182	LYNX1	no
SERPINB1	-0.486599	6.17922	-5.28519	4.38e-07	4.43e-06	5.75007	SERPINB1	no
OSR1	-0.600948	8.07511	-5.28483	4.39e-07	4.43e-06	5.74848	OSR1	no
POPDC3	0.85716	4.81401	5.28479	4.39e-07	4.43e-06	5.74829	POPDC3	no
ANKMY2	-0.439699	6.64512	-5.28359	4.41e-07	4.45e-06	5.74296	ANKMY2	no
TMEM52	0.386006	4.83694	5.28244	4.44e-07	4.47e-06	5.73784	TMEM52	no
CPM	-0.94662	6.55273	-5.27628	4.57e-07	4.6e-06	5.7105	CPM	no
MAOB	-0.34229	5.73168	-5.27607	4.57e-07	4.6e-06	5.70957	MAOB	no
SDC1	-0.70067	6.43843	-5.27563	4.58e-07	4.61e-06	5.70762	SDC1	no
DHX15	0.252901	8.06938	5.27239	4.65e-07	4.67e-06	5.69327	DHX15	no
KIAA1161	-0.246776	4.82204	-5.27153	4.67e-07	4.69e-06	5.68946	KIAA1161	no
PPM1L	-0.42686	6.24457	-5.26897	4.72e-07	4.74e-06	5.67813	PPM1L	no
ARL15	0.337642	8.15833	5.26752	4.75e-07	4.77e-06	5.67167	ARL15	no
ZNF423	-0.511664	7.98663	-5.26638	4.78e-07	4.79e-06	5.66666	ZNF423	no
DHPS	0.334742	8.50001	5.2658	4.79e-07	4.8e-06	5.66407	DHPS	no
NPAS4	-0.585898	6.07863	-5.26521	4.8e-07	4.81e-06	5.66147	NPAS4	no
GGCT	0.678546	8.94327	5.26488	4.81e-07	4.81e-06	5.66001	GGCT	no
KATNAL1	-0.380566	6.11457	-5.26265	4.86e-07	4.86e-06	5.65013	KATNAL1	no
SV2A	-0.426068	6.49658	-5.26141	4.89e-07	4.88e-06	5.64463	SV2A	no
DEK	-0.286444	9.87922	-5.26034	4.91e-07	4.9e-06	5.63992	DEK	no
SLC7A14	-0.35197	4.47466	-5.25976	4.92e-07	4.91e-06	5.63735	SLC7A14	no
RAD51AP1	0.416608	5.28871	5.25897	4.94e-07	4.93e-06	5.63382	RAD51AP1	no
F7	-0.404572	5.72588	-5.25738	4.98e-07	4.96e-06	5.62681	F7	no
BEX4	-0.381085	8.87632	-5.25734	4.98e-07	4.96e-06	5.62663	BEX4	no
RORB	-0.796676	7.26005	-5.25724	4.98e-07	4.96e-06	5.62617	RORB	no
GCA	0.421104	8.28219	5.25718	4.98e-07	4.96e-06	5.62591	GCA	no
MVD	-0.35638	6.41684	-5.25657	5e-07	4.97e-06	5.6232	MVD	no
CHD6	0.311488	7.73957	5.25481	5.04e-07	5e-06	5.61544	CHD6	no
DYRK1B	0.333224	6.0219	5.25433	5.05e-07	5.01e-06	5.61332	DYRK1B	no
MICALL2	0.438253	6.41348	5.25221	5.1e-07	5.06e-06	5.60394	MICALL2	no
BRSK2	0.457738	4.7059	5.25148	5.12e-07	5.07e-06	5.6007	BRSK2	no
TGM4	-1.73506	6.00778	-5.25127	5.12e-07	5.07e-06	5.59976	TGM4	down
DDOST	0.308147	9.6577	5.25125	5.12e-07	5.07e-06	5.5997	DDOST	no
KCNMA1	-0.411855	8.2153	-5.24997	5.15e-07	5.1e-06	5.59404	KCNMA1	no
S1PR3	-0.488638	7.57559	-5.24859	5.18e-07	5.12e-06	5.58793	S1PR3	no
TSPYL2	-0.58677	7.56862	-5.2467	5.23e-07	5.17e-06	5.5796	TSPYL2	no
PIGM	0.386432	8.99943	5.24381	5.3e-07	5.23e-06	5.5668	PIGM	no
SGCE	-0.743445	8.73394	-5.24142	5.36e-07	5.28e-06	5.55628	SGCE	no
MAP9	0.450662	8.39431	5.24138	5.36e-07	5.28e-06	5.55609	MAP9	no
SLC13A3	0.421983	5.79036	5.24026	5.38e-07	5.31e-06	5.55113	SLC13A3	no
RRAS	-0.423296	9.48971	-5.23714	5.46e-07	5.38e-06	5.53738	RRAS	no
CHN2	0.691891	6.95363	5.23663	5.47e-07	5.39e-06	5.53514	CHN2	no
S100A6	-0.465432	7.05509	-5.23587	5.49e-07	5.4e-06	5.53176	S100A6	no
RNASEH2A	0.454367	5.42613	5.23362	5.55e-07	5.46e-06	5.52186	RNASEH2A	no
MYO5C	0.364705	9.29558	5.23303	5.57e-07	5.47e-06	5.51926	MYO5C	no
WASF1	0.425746	6.45093	5.23237	5.58e-07	5.48e-06	5.51635	WASF1	no
TTL	0.227533	5.39545	5.23009	5.64e-07	5.53e-06	5.50629	TTL	no
MUC15	-0.510613	4.64232	-5.23007	5.64e-07	5.53e-06	5.50621	MUC15	no
INPP1	-0.660742	8.3135	-5.22917	5.66e-07	5.55e-06	5.50222	INPP1	no
TRPM2	0.331334	4.86709	5.22883	5.67e-07	5.55e-06	5.50074	TRPM2	no
AGPAT3	0.39948	6.94907	5.22748	5.71e-07	5.58e-06	5.49479	AGPAT3	no
MID1	-0.532915	7.50809	-5.22543	5.76e-07	5.63e-06	5.48576	MID1	no
FOXF1	-0.556712	7.22207	-5.22367	5.81e-07	5.68e-06	5.47797	FOXF1	no
POLD2	0.444091	7.66918	5.22304	5.83e-07	5.69e-06	5.47521	POLD2	no
MINA	0.255777	6.39658	5.22235	5.84e-07	5.7e-06	5.47216	MINA	no
DPAGT1	0.377486	8.81359	5.21895	5.94e-07	5.79e-06	5.45721	DPAGT1	no
ACAA2	-0.405026	7.03113	-5.21743	5.98e-07	5.82e-06	5.4505	ACAA2	no
SMARCC1	0.372761	8.55794	5.21649	6e-07	5.84e-06	5.44639	SMARCC1	no
XAF1	-0.483883	8.53442	-5.21648	6e-07	5.84e-06	5.44636	XAF1	no
FKBPL	0.318244	4.82789	5.21643	6e-07	5.84e-06	5.44613	FKBPL	no
PPP1R14C	-0.462015	4.47269	-5.21595	6.02e-07	5.85e-06	5.44401	PPP1R14C	no
ZNF658	-0.378429	7.66778	-5.21263	6.11e-07	5.93e-06	5.42938	ZNF658	no
PCDHGA8	0.504465	5.99565	5.21124	6.15e-07	5.97e-06	5.42329	PCDHGA8	no
TGFB1I1	-0.472466	7.65672	-5.20995	6.18e-07	6e-06	5.41762	TGFB1I1	no
MX1	-0.578432	10.0613	-5.20875	6.22e-07	6.03e-06	5.41235	MX1	no
CBX7	-0.340712	7.08437	-5.20825	6.23e-07	6.04e-06	5.41014	CBX7	no
LARS2	0.341968	5.74215	5.20369	6.36e-07	6.16e-06	5.39011	LARS2	no
SLC22A18	-0.440635	6.12451	-5.20283	6.39e-07	6.18e-06	5.38631	SLC22A18	no
CPNE7	0.474624	4.65955	5.20225	6.4e-07	6.19e-06	5.38376	CPNE7	no
BAG4	-0.306366	7.83877	-5.20197	6.41e-07	6.2e-06	5.38254	BAG4	no
PNMT	-0.510375	4.53748	-5.19987	6.47e-07	6.25e-06	5.37333	PNMT	no
GALNT3	0.566736	6.15416	5.19751	6.54e-07	6.32e-06	5.36299	GALNT3	no
KCNT2	-0.422119	5.14154	-5.1966	6.57e-07	6.34e-06	5.35896	KCNT2	no
ASPM	0.456127	4.64929	5.19552	6.6e-07	6.36e-06	5.35425	ASPM	no
IDS	-0.241419	8.51696	-5.19435	6.64e-07	6.39e-06	5.34911	IDS	no
DIO3OS	-0.366123	7.43884	-5.19313	6.68e-07	6.43e-06	5.34375	DIO3OS	no
NRCAM	0.587952	4.94494	5.19283	6.69e-07	6.43e-06	5.34242	NRCAM	no
ADAMTS5	-0.346816	4.63433	-5.19235	6.7e-07	6.44e-06	5.34031	ADAMTS5	no
ZFAND5	-0.381771	10.046	-5.18797	6.83e-07	6.57e-06	5.32112	ZFAND5	no
LAD1	0.360007	8.14721	5.18629	6.89e-07	6.61e-06	5.31374	LAD1	no
CHMP4C	0.531243	6.03645	5.18432	6.95e-07	6.67e-06	5.30512	CHMP4C	no
CDH3	-0.70679	6.35716	-5.1841	6.96e-07	6.67e-06	5.30417	CDH3	no
CRELD2	0.522441	7.16621	5.18365	6.97e-07	6.68e-06	5.30217	CRELD2	no
EPHA10	0.197817	4.39137	5.1822	7.02e-07	6.72e-06	5.29583	EPHA10	no
FAM127A	-0.401251	8.19576	-5.17966	7.1e-07	6.79e-06	5.28471	FAM127A	no
FAT4	-0.555115	6.18733	-5.17802	7.15e-07	6.84e-06	5.27754	FAT4	no
ATP6V0D2	-0.623662	4.85394	-5.17764	7.16e-07	6.84e-06	5.27585	ATP6V0D2	no
CTSH	-0.443343	8.52806	-5.17756	7.17e-07	6.84e-06	5.2755	CTSH	no
ARFGAP3	0.349767	10.0355	5.17709	7.18e-07	6.85e-06	5.27345	ARFGAP3	no
NME4	0.279222	11.9041	5.17482	7.26e-07	6.92e-06	5.26353	NME4	no
C1QTNF3	0.483731	5.34297	5.1744	7.27e-07	6.93e-06	5.26168	C1QTNF3	no
ZNF792	0.598736	7.3643	5.17067	7.39e-07	7.04e-06	5.24535	ZNF792	no
SCGB3A1	-0.576915	5.1973	-5.17041	7.4e-07	7.05e-06	5.24424	SCGB3A1	no
MGAT4B	0.36546	6.62981	5.16984	7.42e-07	7.06e-06	5.24174	MGAT4B	no
SEMA3E	-0.645585	5.71521	-5.16953	7.43e-07	7.07e-06	5.24038	SEMA3E	no
ZMYND11	-0.261197	8.02169	-5.16813	7.48e-07	7.11e-06	5.23426	ZMYND11	no
STON2	-0.505448	5.21288	-5.16405	7.62e-07	7.23e-06	5.2164	STON2	no
IRX2	0.731027	6.72925	5.16262	7.67e-07	7.28e-06	5.21018	IRX2	no
PRTFDC1	-0.42667	5.59361	-5.15242	8.03e-07	7.62e-06	5.16564	PRTFDC1	no
PHC3	-0.215247	7.63116	-5.14955	8.14e-07	7.71e-06	5.15312	PHC3	no
ZWINT	0.48998	6.1705	5.14909	8.15e-07	7.72e-06	5.15113	ZWINT	no
GSTA1	-0.947465	5.88809	-5.14842	8.18e-07	7.74e-06	5.14819	GSTA1	no
MNX1	0.392004	4.62633	5.14812	8.19e-07	7.75e-06	5.14687	MNX1	no
SOX21	-0.333428	4.7687	-5.14603	8.27e-07	7.81e-06	5.13776	SOX21	no
FZD4	0.553202	8.9198	5.14589	8.27e-07	7.81e-06	5.13717	FZD4	no
VAMP5	-0.376365	7.07765	-5.14536	8.29e-07	7.83e-06	5.13483	VAMP5	no
MEX3A	0.402045	4.68514	5.14414	8.34e-07	7.87e-06	5.12952	MEX3A	no
LAMB2	-0.461312	9.20794	-5.14243	8.4e-07	7.92e-06	5.1221	LAMB2	no
UTP15	0.358938	5.68389	5.1404	8.48e-07	7.99e-06	5.11325	UTP15	no
VAX2	0.446979	5.00488	5.14023	8.49e-07	7.99e-06	5.11252	VAX2	no
MAX	-0.245425	8.9241	-5.1393	8.52e-07	8.02e-06	5.10847	MAX	no
ALG14	0.421167	6.56107	5.13576	8.66e-07	8.14e-06	5.09302	ALG14	no
ACSS1	0.396091	8.03322	5.13507	8.69e-07	8.16e-06	5.09004	ACSS1	no
TIAM2	-0.361333	5.56669	-5.13151	8.83e-07	8.29e-06	5.07453	TIAM2	no
ACAD8	0.641451	7.38205	5.13128	8.84e-07	8.3e-06	5.07352	ACAD8	no
DSTN	-0.220253	10.5825	-5.1282	8.96e-07	8.41e-06	5.06014	DSTN	no
RAPGEF4	0.67411	5.929	5.12577	9.06e-07	8.49e-06	5.04957	RAPGEF4	no
TRAF7	0.27842	5.52194	5.12574	9.06e-07	8.49e-06	5.04944	TRAF7	no
ELAVL2	0.473855	4.55909	5.12563	9.06e-07	8.49e-06	5.04897	ELAVL2	no
PRMT3	0.437059	5.22671	5.1179	9.39e-07	8.78e-06	5.01538	PRMT3	no
RCAN2	-0.518054	8.7168	-5.11787	9.39e-07	8.78e-06	5.01526	RCAN2	no
GPX2	-0.631851	5.14778	-5.11761	9.4e-07	8.78e-06	5.0141	GPX2	no
SYT1	-0.884586	6.51558	-5.11695	9.43e-07	8.8e-06	5.01123	SYT1	no
SIPA1L3	0.288714	5.53155	5.11584	9.47e-07	8.84e-06	5.00645	SIPA1L3	no
FOXM1	0.457277	5.28262	5.11548	9.49e-07	8.85e-06	5.00487	FOXM1	no
DPYSL2	-0.407045	9.70718	-5.11493	9.51e-07	8.87e-06	5.00247	DPYSL2	no
ADCY5	-0.326259	4.99316	-5.11442	9.53e-07	8.88e-06	5.00028	ADCY5	no
BDNF	-0.173765	4.40879	-5.1126	9.61e-07	8.95e-06	4.99237	BDNF	no
CDC26	-0.280788	9.98653	-5.11229	9.63e-07	8.96e-06	4.99104	CDC26	no
PRKRIR	0.432024	8.54045	5.11199	9.64e-07	8.96e-06	4.98973	PRKRIR	no
TSPAN7	-0.391417	6.13842	-5.11088	9.69e-07	9e-06	4.98489	TSPAN7	no
REV3L	-0.51688	7.58147	-5.11049	9.7e-07	9.01e-06	4.9832	REV3L	no
TNFRSF25	-0.302579	5.20411	-5.10977	9.74e-07	9.04e-06	4.98011	TNFRSF25	no
SCN5A	-0.233948	4.35759	-5.10915	9.76e-07	9.06e-06	4.97742	SCN5A	no
CCDC34	0.348117	7.05808	5.10565	9.92e-07	9.2e-06	4.96221	CCDC34	no
PSMG3	0.382883	6.51018	5.10307	1e-06	9.3e-06	4.95104	PSMG3	no
RPS24	0.314805	9.59736	5.1016	1.01e-06	9.35e-06	4.94469	RPS24	no
PPIC	-0.506269	9.04767	-5.09543	1.04e-06	9.61e-06	4.91797	PPIC	no
IFITM1	-0.606141	9.46244	-5.09511	1.04e-06	9.62e-06	4.91656	IFITM1	no
MRVI1	-0.49456	6.97638	-5.09458	1.04e-06	9.63e-06	4.91427	MRVI1	no
ZNF443	0.373698	6.69973	5.09371	1.05e-06	9.67e-06	4.91049	ZNF443	no
KCNH4	-0.360513	4.80068	-5.09185	1.06e-06	9.74e-06	4.90244	KCNH4	no
INTU	-0.434134	6.86125	-5.09176	1.06e-06	9.74e-06	4.90205	INTU	no
PCDHB11	0.524769	5.4437	5.09084	1.06e-06	9.77e-06	4.8981	PCDHB11	no
NMRAL1	0.352444	9.28649	5.09039	1.06e-06	9.79e-06	4.89615	NMRAL1	no
KALRN	0.250938	4.85405	5.08861	1.07e-06	9.86e-06	4.88846	KALRN	no
ACTL6A	0.383144	7.60872	5.08771	1.08e-06	9.89e-06	4.88456	ACTL6A	no
PTEN	-0.395967	8.88088	-5.08697	1.08e-06	9.92e-06	4.88136	PTEN	no
UHRF1	0.480848	5.85436	5.08515	1.09e-06	1e-05	4.87348	UHRF1	no
PGAM5	0.364684	5.56473	5.08448	1.09e-06	1e-05	4.8706	PGAM5	no
GLIS1	-0.434028	5.14915	-5.08443	1.09e-06	1e-05	4.87037	GLIS1	no
PCDHB2	0.946758	5.80289	5.08437	1.09e-06	1e-05	4.8701	PCDHB2	no
FCHSD2	-0.320699	7.87037	-5.08418	1.09e-06	1e-05	4.8693	FCHSD2	no
GRIK2	-0.261402	4.80295	-5.08242	1.1e-06	1.01e-05	4.86167	GRIK2	no
CAPS2	-0.236455	5.07732	-5.0809	1.11e-06	1.02e-05	4.8551	CAPS2	no
RPAP1	0.278278	5.76937	5.07985	1.11e-06	1.02e-05	4.85056	RPAP1	no
EPB41L3	-0.59686	7.10163	-5.07916	1.12e-06	1.02e-05	4.84761	EPB41L3	no
FMNL2	0.391211	5.99966	5.07905	1.12e-06	1.02e-05	4.8471	FMNL2	no
HMGB3	0.399304	6.70991	5.07613	1.13e-06	1.03e-05	4.8345	HMGB3	no
CCT6A	0.276454	8.09464	5.07476	1.14e-06	1.04e-05	4.82858	CCT6A	no
AKAP12	-0.417519	7.1846	-5.07418	1.14e-06	1.04e-05	4.82607	AKAP12	no
ZNF593	0.505817	9.22792	5.06771	1.18e-06	1.07e-05	4.79815	ZNF593	no
LONRF3	-0.417728	5.1477	-5.06764	1.18e-06	1.07e-05	4.79788	LONRF3	no
HPCAL1	0.376355	7.75633	5.06449	1.19e-06	1.09e-05	4.7843	HPCAL1	no
UHRF1BP1	0.298578	6.57504	5.06312	1.2e-06	1.09e-05	4.77839	UHRF1BP1	no
SMAD6	-0.427337	7.34831	-5.06312	1.2e-06	1.09e-05	4.77839	SMAD6	no
AS3MT	-0.493325	6.21146	-5.06074	1.21e-06	1.1e-05	4.76814	AS3MT	no
LOX	0.625735	5.76679	5.06051	1.21e-06	1.1e-05	4.76713	LOX	no
FAM181B	-0.3447	5.4002	-5.05847	1.23e-06	1.11e-05	4.75833	FAM181B	no
PDE1C	-0.250875	4.3236	-5.05827	1.23e-06	1.11e-05	4.7575	PDE1C	no
SH3GL3	-0.398186	4.7623	-5.0543	1.25e-06	1.13e-05	4.74039	SH3GL3	no
SPTAN1	-0.241525	9.63975	-5.0515	1.26e-06	1.15e-05	4.72833	SPTAN1	no
GJC2	-0.408256	5.57801	-5.04901	1.28e-06	1.16e-05	4.71764	GJC2	no
PFAS	0.469969	8.32331	5.04717	1.29e-06	1.17e-05	4.70973	PFAS	no
DDIT4	-0.77074	9.38909	-5.04654	1.29e-06	1.17e-05	4.70702	DDIT4	no
ABCG4	-0.402384	5.36853	-5.0455	1.3e-06	1.17e-05	4.70253	ABCG4	no
NOP2	0.412101	6.87619	5.04306	1.31e-06	1.19e-05	4.69205	NOP2	no
RAB26	0.643324	6.84216	5.0416	1.32e-06	1.19e-05	4.68578	RAB26	no
SELM	-0.584776	8.87005	-5.03907	1.34e-06	1.21e-05	4.67488	SELM	no
CACNG4	-0.453086	4.9057	-5.03891	1.34e-06	1.21e-05	4.6742	CACNG4	no
TGFB2	-0.55056	6.95746	-5.03885	1.34e-06	1.21e-05	4.67395	TGFB2	no
ZNF696	0.349621	7.62921	5.03855	1.34e-06	1.21e-05	4.67268	ZNF696	no
B3GNT9	-0.383143	6.6025	-5.03684	1.35e-06	1.21e-05	4.66534	B3GNT9	no
RARRES2	-0.630779	8.88425	-5.03682	1.35e-06	1.21e-05	4.66524	RARRES2	no
ZDHHC18	0.292237	5.10146	5.03532	1.36e-06	1.22e-05	4.65881	ZDHHC18	no
PEBP4	-1.02411	7.55311	-5.0342	1.37e-06	1.23e-05	4.654	PEBP4	down
TOR2A	0.33854	5.88779	5.03419	1.37e-06	1.23e-05	4.65393	TOR2A	no
NXPH4	-0.45119	5.23629	-5.03335	1.37e-06	1.23e-05	4.65035	NXPH4	no
EIF4E	0.274534	6.35003	5.03298	1.37e-06	1.23e-05	4.64876	EIF4E	no
TUBG2	-0.585442	8.16445	-5.03278	1.37e-06	1.23e-05	4.64788	TUBG2	no
SORD	-0.503542	9.74642	-5.0316	1.38e-06	1.24e-05	4.64282	SORD	no
QRICH2	0.299476	4.74058	5.03086	1.39e-06	1.24e-05	4.63964	QRICH2	no
CX3CL1	-0.534041	6.83552	-5.02717	1.41e-06	1.26e-05	4.62384	CX3CL1	no
ZNF233	0.507789	6.04474	5.02475	1.42e-06	1.27e-05	4.61345	ZNF233	no
MRPL50	0.503278	6.56548	5.02385	1.43e-06	1.28e-05	4.60961	MRPL50	no
ZNF229	0.360428	5.35353	5.02107	1.45e-06	1.29e-05	4.59766	ZNF229	no
LHX6	0.266153	4.79524	5.02031	1.45e-06	1.3e-05	4.5944	LHX6	no
ZNF587	0.404984	7.17346	5.01981	1.46e-06	1.3e-05	4.5923	ZNF587	no
TEAD3	-0.369902	8.3157	-5.0195	1.46e-06	1.3e-05	4.59093	TEAD3	no
CNOT4	-0.244835	8.08886	-5.01846	1.47e-06	1.31e-05	4.58648	CNOT4	no
BAX	0.378907	5.98252	5.01525	1.49e-06	1.32e-05	4.57275	BAX	no
CLDN5	-0.579683	8.31631	-5.01351	1.5e-06	1.33e-05	4.56529	CLDN5	no
SLCO3A1	-0.359557	5.05304	-5.01345	1.5e-06	1.33e-05	4.56505	SLCO3A1	no
MTHFD2L	0.304883	6.91917	5.01068	1.52e-06	1.35e-05	4.55319	MTHFD2L	no
ZIC5	0.528525	4.60297	5.01002	1.52e-06	1.35e-05	4.55035	ZIC5	no
ZNF189	0.328268	7.0347	5.00975	1.52e-06	1.35e-05	4.54922	ZNF189	no
SPTBN1	-0.285665	9.41469	-5.00832	1.53e-06	1.36e-05	4.5431	SPTBN1	no
MTHFD1L	0.292139	4.81343	5.00778	1.54e-06	1.36e-05	4.54077	MTHFD1L	no
MTFR1	0.329657	5.89185	5.00769	1.54e-06	1.36e-05	4.54041	MTFR1	no
SLC22A11	0.417809	4.76559	5.00664	1.54e-06	1.37e-05	4.53593	SLC22A11	no
WWP2	0.373301	6.71995	5.00512	1.55e-06	1.38e-05	4.5294	WWP2	no
TCEA3	0.632295	8.10919	5.0022	1.57e-06	1.39e-05	4.51693	TCEA3	no
FCGRT	-0.431758	8.52257	-5.00035	1.59e-06	1.4e-05	4.50901	FCGRT	no
TBC1D2B	-0.315972	6.21061	-4.9993	1.6e-06	1.41e-05	4.50455	TBC1D2B	no
ABCA3	0.42256	8.02129	4.99876	1.6e-06	1.41e-05	4.50224	ABCA3	no
RGS17	0.895448	7.68671	4.99457	1.63e-06	1.44e-05	4.48435	RGS17	no
UGP2	-0.294133	8.15677	-4.99079	1.66e-06	1.46e-05	4.4682	UGP2	no
RAB3B	0.444471	6.31018	4.99065	1.66e-06	1.46e-05	4.46763	RAB3B	no
ITIH5	-0.414292	8.02457	-4.98948	1.67e-06	1.47e-05	4.46261	ITIH5	no
PARD6A	0.302746	5.4389	4.98911	1.67e-06	1.47e-05	4.46105	PARD6A	no
KCNU1	0.54024	4.84002	4.98881	1.67e-06	1.47e-05	4.45975	KCNU1	no
ESPNL	-0.323119	5.58587	-4.98847	1.67e-06	1.47e-05	4.45832	ESPNL	no
EPRS	0.335958	7.4894	4.98362	1.71e-06	1.5e-05	4.43764	EPRS	no
MYH6	-0.97761	5.50169	-4.98205	1.72e-06	1.51e-05	4.43096	MYH6	no
ATP13A2	0.313733	7.01856	4.98114	1.73e-06	1.52e-05	4.42709	ATP13A2	no
WFS1	-0.386623	9.4259	-4.98077	1.73e-06	1.52e-05	4.4255	WFS1	no
CECR5	0.397983	8.76361	4.98051	1.73e-06	1.52e-05	4.42441	CECR5	no
ZNF74	0.280148	6.04097	4.97846	1.75e-06	1.53e-05	4.41564	ZNF74	no
CELSR3	0.485998	6.76343	4.97823	1.75e-06	1.53e-05	4.41468	CELSR3	no
RBM47	0.422701	8.62086	4.97658	1.76e-06	1.54e-05	4.40763	RBM47	no
MCM10	0.215164	4.5577	4.97548	1.77e-06	1.55e-05	4.40295	MCM10	no
ODF2L	-0.33823	7.17013	-4.97442	1.78e-06	1.56e-05	4.39847	ODF2L	no
IRF6	-0.503233	7.13887	-4.97367	1.79e-06	1.56e-05	4.39525	IRF6	no
IL6ST	-0.356921	8.79429	-4.97313	1.79e-06	1.56e-05	4.39297	IL6ST	no
HLTF	0.36901	8.93942	4.97308	1.79e-06	1.56e-05	4.39277	HLTF	no
SPRED2	-0.394422	7.37474	-4.96862	1.83e-06	1.59e-05	4.37378	SPRED2	no
PLA2G4C	0.814939	7.27081	4.9675	1.84e-06	1.6e-05	4.36901	PLA2G4C	no
FAM47E	0.177197	4.29488	4.96685	1.84e-06	1.6e-05	4.36626	FAM47E	no
FAM71F1	0.413196	5.0066	4.96669	1.84e-06	1.61e-05	4.36558	FAM71F1	no
SCGB2A1	-1.08291	6.50574	-4.96644	1.85e-06	1.61e-05	4.36451	SCGB2A1	down
BNC2	-0.395777	5.09114	-4.96594	1.85e-06	1.61e-05	4.3624	BNC2	no
PYGL	-0.699143	6.93199	-4.96491	1.86e-06	1.61e-05	4.35802	PYGL	no
EPB41L4B	0.564007	6.12279	4.96367	1.87e-06	1.62e-05	4.35272	EPB41L4B	no
BRD1	0.348746	7.94677	4.96266	1.88e-06	1.63e-05	4.34843	BRD1	no
CRTAC1	-0.364812	4.4096	-4.96211	1.88e-06	1.63e-05	4.34611	CRTAC1	no
TNRC6A	-0.306982	7.7249	-4.96058	1.89e-06	1.64e-05	4.3396	TNRC6A	no
COPZ2	-0.534399	6.29253	-4.96008	1.9e-06	1.64e-05	4.33747	COPZ2	no
PCDHGA1	0.278321	4.53302	4.96007	1.9e-06	1.64e-05	4.33742	PCDHGA1	no
TACC3	0.520707	5.23814	4.95734	1.92e-06	1.66e-05	4.32586	TACC3	no
USP3	0.307235	7.72071	4.95594	1.93e-06	1.67e-05	4.31988	USP3	no
PKP3	0.419932	5.78319	4.95501	1.94e-06	1.68e-05	4.31593	PKP3	no
APCDD1L	-0.523975	5.30858	-4.95434	1.95e-06	1.68e-05	4.31313	APCDD1L	no
CDS2	-0.369815	7.87609	-4.95206	1.97e-06	1.7e-05	4.30342	CDS2	no
S100A4	-0.640278	8.50098	-4.94949	1.99e-06	1.72e-05	4.29252	S100A4	no
INPP5F	-0.280636	5.91959	-4.94911	1.99e-06	1.72e-05	4.29093	INPP5F	no
UNC5A	1.02695	5.55003	4.94843	2e-06	1.72e-05	4.28802	UNC5A	up
RPL37	0.218049	9.31766	4.94839	2e-06	1.72e-05	4.28786	RPL37	no
CARTPT	-1.04486	5.42691	-4.94777	2e-06	1.73e-05	4.28526	CARTPT	down
RPS7	0.279822	7.7947	4.94555	2.02e-06	1.74e-05	4.27585	RPS7	no
PQLC3	-0.317501	7.12015	-4.94542	2.02e-06	1.74e-05	4.27529	PQLC3	no
GPATCH4	0.304018	6.63197	4.94382	2.04e-06	1.75e-05	4.26849	GPATCH4	no
CDAN1	-0.283655	7.81491	-4.94368	2.04e-06	1.75e-05	4.2679	CDAN1	no
UBAP2	0.354641	6.84966	4.94349	2.04e-06	1.75e-05	4.26709	UBAP2	no
PDIA4	0.408716	8.6271	4.94327	2.04e-06	1.75e-05	4.26618	PDIA4	no
KCNMB3	0.263828	5.25478	4.94315	2.05e-06	1.75e-05	4.26564	KCNMB3	no
ACTB	-0.210726	12.4202	-4.94182	2.06e-06	1.76e-05	4.26003	ACTB	no
MRAP2	-0.368944	4.7714	-4.94004	2.07e-06	1.78e-05	4.25248	MRAP2	no
HS2ST1	0.339342	5.74672	4.93814	2.09e-06	1.79e-05	4.24444	HS2ST1	no
NFKB2	0.39366	6.23415	4.93786	2.09e-06	1.79e-05	4.24324	NFKB2	no
POSTN	0.553166	6.83948	4.93364	2.13e-06	1.82e-05	4.2254	POSTN	no
PDE4B	-0.570332	6.88725	-4.93187	2.15e-06	1.84e-05	4.2179	PDE4B	no
GLDC	0.633781	4.64108	4.93136	2.15e-06	1.84e-05	4.21574	GLDC	no
GRPEL1	0.290025	7.46186	4.9305	2.16e-06	1.85e-05	4.21209	GRPEL1	no
C1QTNF1	-0.371425	6.59384	-4.92963	2.17e-06	1.85e-05	4.20844	C1QTNF1	no
FBXL2	-0.479027	5.83695	-4.92749	2.19e-06	1.87e-05	4.19937	FBXL2	no
MRPL23	0.374009	5.60934	4.92562	2.21e-06	1.88e-05	4.19147	MRPL23	no
CDKN2A	0.328489	4.69415	4.92453	2.22e-06	1.89e-05	4.18686	CDKN2A	no
GABRP	-1.02115	5.9233	-4.92379	2.23e-06	1.9e-05	4.18375	GABRP	down
LARS	0.237275	8.61688	4.922	2.24e-06	1.91e-05	4.17616	LARS	no
SLC16A9	-0.48794	8.79652	-4.91884	2.28e-06	1.94e-05	4.16284	SLC16A9	no
ODC1	0.450617	9.8118	4.91824	2.28e-06	1.94e-05	4.16028	ODC1	no
EIF3D	0.330942	10.8073	4.91761	2.29e-06	1.94e-05	4.15765	EIF3D	no
CCNB1	0.512299	5.66884	4.91309	2.33e-06	1.98e-05	4.13856	CCNB1	no
BAIAP2L1	0.435128	8.56806	4.91285	2.34e-06	1.98e-05	4.13756	BAIAP2L1	no
ULK3	0.352109	6.5167	4.91187	2.35e-06	1.99e-05	4.13341	ULK3	no
HMGCLL1	-0.310591	4.61838	-4.90912	2.38e-06	2.01e-05	4.12181	HMGCLL1	no
OTX1	0.330408	4.38467	4.90684	2.4e-06	2.03e-05	4.11221	OTX1	no
PRR15L	0.557703	6.9518	4.90678	2.4e-06	2.03e-05	4.11197	PRR15L	no
MARVELD2	0.339101	8.39727	4.90661	2.4e-06	2.03e-05	4.11122	MARVELD2	no
DUSP3	-0.317425	10.0573	-4.90549	2.41e-06	2.04e-05	4.10652	DUSP3	no
ANKRD28	0.228144	5.72239	4.90147	2.46e-06	2.08e-05	4.0896	ANKRD28	no
APOL4	-0.654475	6.26159	-4.90082	2.46e-06	2.08e-05	4.08684	APOL4	no
MLPH	0.382458	11.6037	4.9008	2.46e-06	2.08e-05	4.08675	MLPH	no
CDR2L	0.442022	9.03107	4.90034	2.47e-06	2.08e-05	4.08482	CDR2L	no
PYGM	-0.820947	6.20452	-4.90031	2.47e-06	2.08e-05	4.08468	PYGM	no
COL6A2	-0.377305	6.31687	-4.89687	2.51e-06	2.11e-05	4.07022	COL6A2	no
SMARCA4	0.299856	7.60081	4.89623	2.51e-06	2.12e-05	4.06751	SMARCA4	no
TLK1	0.30643	9.02641	4.89529	2.52e-06	2.12e-05	4.06358	TLK1	no
SULF2	-0.378723	6.79302	-4.89516	2.53e-06	2.12e-05	4.06301	SULF2	no
NFIA	-0.335618	8.63961	-4.89255	2.55e-06	2.15e-05	4.05205	NFIA	no
INMT	-0.57293	7.68744	-4.89215	2.56e-06	2.15e-05	4.05034	INMT	no
GPC6	-0.45859	7.81756	-4.88785	2.61e-06	2.19e-05	4.03227	GPC6	no
SLAIN1	0.416311	6.51077	4.88775	2.61e-06	2.19e-05	4.03187	SLAIN1	no
OCA2	-0.301055	4.53727	-4.88664	2.62e-06	2.2e-05	4.0272	OCA2	no
ANXA2P2	-0.397465	10.5457	-4.88525	2.64e-06	2.21e-05	4.02133	ANXA2P2	no
AMPD3	0.533423	6.50734	4.88508	2.64e-06	2.21e-05	4.02065	AMPD3	no
ZNF142	0.243419	8.37631	4.88246	2.67e-06	2.24e-05	4.00965	ZNF142	no
RCC2	0.37163	10.1784	4.88194	2.68e-06	2.24e-05	4.00744	RCC2	no
MTIF2	0.326275	9.00268	4.88127	2.68e-06	2.24e-05	4.00464	MTIF2	no
PDS5B	-0.28594	7.42688	-4.88118	2.68e-06	2.24e-05	4.00428	PDS5B	no
IRF2BP2	-0.402552	10.0937	-4.87847	2.72e-06	2.27e-05	3.99289	IRF2BP2	no
NXN	-0.374762	9.76072	-4.87842	2.72e-06	2.27e-05	3.99268	NXN	no
BRIX1	0.292417	7.6228	4.87692	2.73e-06	2.28e-05	3.98639	BRIX1	no
AGAP1	0.425757	7.52095	4.87608	2.74e-06	2.29e-05	3.98284	AGAP1	no
USP13	0.28123	6.04178	4.87546	2.75e-06	2.29e-05	3.98026	USP13	no
LOC388692	0.297745	5.1873	4.87537	2.75e-06	2.29e-05	3.97988	LOC388692	no
MAP1A	-0.380976	5.25448	-4.87428	2.77e-06	2.3e-05	3.97532	MAP1A	no
RBP4	-0.536343	4.53395	-4.87386	2.77e-06	2.31e-05	3.97353	RBP4	no
GPX8	-0.530514	9.42056	-4.87146	2.8e-06	2.33e-05	3.96346	GPX8	no
PATE2	0.656441	5.05118	4.8711	2.81e-06	2.33e-05	3.96196	PATE2	no
NPM1	0.255204	8.17596	4.8706	2.81e-06	2.34e-05	3.95985	NPM1	no
CHML	0.247815	4.70993	4.86972	2.82e-06	2.34e-05	3.95616	CHML	no
FHIT	0.566683	7.06726	4.86874	2.83e-06	2.35e-05	3.95205	FHIT	no
WDR7	-0.383755	6.62551	-4.86847	2.84e-06	2.35e-05	3.95095	WDR7	no
MAZ	0.373872	8.70563	4.86537	2.88e-06	2.38e-05	3.93794	MAZ	no
SRXN1	0.384174	7.14352	4.86531	2.88e-06	2.38e-05	3.9377	SRXN1	no
ZNF598	0.407813	6.53848	4.86424	2.89e-06	2.39e-05	3.93323	ZNF598	no
FBXW9	0.314638	5.61286	4.86242	2.91e-06	2.41e-05	3.92559	FBXW9	no
MMP10	0.963518	5.2488	4.86214	2.92e-06	2.41e-05	3.92443	MMP10	no
KCNJ8	-0.712938	6.30672	-4.85861	2.96e-06	2.45e-05	3.90966	KCNJ8	no
CDK7	0.412113	9.46919	4.85781	2.97e-06	2.46e-05	3.9063	CDK7	no
DAK	0.288028	5.0746	4.85699	2.98e-06	2.46e-05	3.90286	DAK	no
SPATS2	0.320747	7.13926	4.85387	3.02e-06	2.5e-05	3.88982	SPATS2	no
GNPTAB	-0.431756	6.70434	-4.85363	3.03e-06	2.5e-05	3.88882	GNPTAB	no
DACT3	-0.341362	7.55723	-4.85287	3.04e-06	2.5e-05	3.88565	DACT3	no
DDX55	0.465979	6.83982	4.85122	3.06e-06	2.52e-05	3.87873	DDX55	no
KLK10	-0.326984	4.5171	-4.85063	3.07e-06	2.53e-05	3.87628	KLK10	no
RHBDD3	0.451955	7.17416	4.84953	3.08e-06	2.54e-05	3.87169	RHBDD3	no
HEBP2	0.362884	9.35644	4.84941	3.08e-06	2.54e-05	3.87117	HEBP2	no
HEATR5B	0.29753	6.82254	4.8491	3.09e-06	2.54e-05	3.86986	HEATR5B	no
IL17RB	0.468582	5.72904	4.84857	3.09e-06	2.54e-05	3.86767	IL17RB	no
LMCD1	-0.458036	5.39003	-4.84778	3.11e-06	2.55e-05	3.86435	LMCD1	no
PBXIP1	-0.403703	9.1	-4.84769	3.11e-06	2.55e-05	3.86397	PBXIP1	no
NFS1	0.283206	5.56006	4.84472	3.15e-06	2.58e-05	3.85159	NFS1	no
NSMAF	0.360952	7.59396	4.84356	3.16e-06	2.59e-05	3.84675	NSMAF	no
DOT1L	0.205318	5.31846	4.84306	3.17e-06	2.6e-05	3.84465	DOT1L	no
YARS	0.325823	8.37104	4.84133	3.19e-06	2.62e-05	3.83742	YARS	no
SREBF1	0.303434	7.66224	4.84093	3.2e-06	2.62e-05	3.83576	SREBF1	no
PCDHB14	0.440737	5.5361	4.84091	3.2e-06	2.62e-05	3.83567	PCDHB14	no
ATHL1	-0.762277	8.53955	-4.84023	3.21e-06	2.62e-05	3.83283	ATHL1	no
RMST	-0.700047	6.85434	-4.83955	3.22e-06	2.63e-05	3.82999	RMST	no
MN1	-0.549216	6.54789	-4.83765	3.24e-06	2.65e-05	3.82208	MN1	no
CLCA2	-0.633247	4.76676	-4.83663	3.26e-06	2.66e-05	3.8178	CLCA2	no
ARHGAP28	0.636421	5.79921	4.83656	3.26e-06	2.66e-05	3.81751	ARHGAP28	no
SYNC	-0.565293	7.48407	-4.83519	3.28e-06	2.67e-05	3.8118	SYNC	no
MND1	0.535762	5.26755	4.83388	3.3e-06	2.69e-05	3.80633	MND1	no
PDZRN4	-0.430394	5.95749	-4.83373	3.3e-06	2.69e-05	3.80573	PDZRN4	no
VPS45	-0.25391	7.22281	-4.83262	3.32e-06	2.7e-05	3.80111	VPS45	no
RPL6	0.456789	10.2162	4.8323	3.32e-06	2.7e-05	3.79975	RPL6	no
NOVA1	-0.342301	6.13556	-4.83109	3.34e-06	2.72e-05	3.79472	NOVA1	no
SLC25A40	0.314646	6.56415	4.8258	3.42e-06	2.78e-05	3.77269	SLC25A40	no
ZNF618	0.350527	5.87306	4.82484	3.43e-06	2.79e-05	3.76868	ZNF618	no
PLAGL1	-0.393086	6.0308	-4.82435	3.44e-06	2.79e-05	3.76664	PLAGL1	no
PRR16	0.999165	6.94852	4.82429	3.44e-06	2.79e-05	3.7664	PRR16	no
SSBP2	-0.413869	7.25817	-4.82285	3.46e-06	2.81e-05	3.76041	SSBP2	no
AIFM2	-0.253622	4.85865	-4.82182	3.48e-06	2.82e-05	3.7561	AIFM2	no
FBXO45	0.39744	6.41967	4.82049	3.5e-06	2.83e-05	3.75057	FBXO45	no
GLB1L3	0.73939	5.44153	4.81905	3.52e-06	2.85e-05	3.74456	GLB1L3	no
AHNAK	-0.23818	9.63433	-4.81804	3.53e-06	2.86e-05	3.74038	AHNAK	no
PAK1IP1	-0.622602	10.2636	-4.81725	3.55e-06	2.87e-05	3.7371	PAK1IP1	no
PTGS2	-0.928478	9.38006	-4.81694	3.55e-06	2.87e-05	3.73581	PTGS2	no
ZNF615	0.619957	9.59006	4.81348	3.6e-06	2.91e-05	3.72143	ZNF615	no
WDR74	0.247428	7.15558	4.8121	3.63e-06	2.93e-05	3.71567	WDR74	no
ORMDL3	-0.330191	8.84218	-4.81157	3.63e-06	2.93e-05	3.71346	ORMDL3	no
STK32B	-0.32975	5.16335	-4.81067	3.65e-06	2.94e-05	3.70975	STK32B	no
FAM188A	0.412951	6.98814	4.80974	3.66e-06	2.95e-05	3.70588	FAM188A	no
CD2AP	0.31783	7.16036	4.8081	3.69e-06	2.97e-05	3.69907	CD2AP	no
RGL4	0.19063	4.98692	4.80724	3.7e-06	2.98e-05	3.69551	RGL4	no
FGD4	-0.456809	7.07804	-4.80613	3.72e-06	2.99e-05	3.69088	FGD4	no
DVL1	0.442739	7.57994	4.80148	3.8e-06	3.05e-05	3.6716	DVL1	no
LAMP3	-0.421772	5.03455	-4.80081	3.81e-06	3.06e-05	3.66878	LAMP3	no
PVR	0.308494	6.92726	4.79923	3.83e-06	3.08e-05	3.66224	PVR	no
CREB3L1	0.586375	9.44004	4.798	3.85e-06	3.09e-05	3.65714	CREB3L1	no
EYA2	-0.522068	7.57557	-4.79789	3.86e-06	3.09e-05	3.65671	EYA2	no
IFT57	-0.382995	9.31302	-4.79727	3.87e-06	3.1e-05	3.65412	IFT57	no
IARS2	0.30772	9.76196	4.79589	3.89e-06	3.12e-05	3.64839	IARS2	no
ZMYND8	0.358158	6.64618	4.79558	3.89e-06	3.12e-05	3.64712	ZMYND8	no
IQCH	0.23341	4.72106	4.79448	3.91e-06	3.13e-05	3.64254	IQCH	no
KIAA0020	0.348449	7.0168	4.79275	3.94e-06	3.15e-05	3.63537	KIAA0020	no
TSG101	0.334018	7.2602	4.79271	3.94e-06	3.15e-05	3.63522	TSG101	no
SCN1B	0.351376	5.10639	4.79216	3.95e-06	3.16e-05	3.63295	SCN1B	no
HBQ1	0.292999	4.47101	4.79082	3.97e-06	3.17e-05	3.62738	HBQ1	no
UCP2	-0.619495	7.03376	-4.79081	3.97e-06	3.17e-05	3.62736	UCP2	no
MBNL1	-0.254684	8.67329	-4.79081	3.97e-06	3.17e-05	3.62734	MBNL1	no
MCCC2	0.664873	9.04822	4.79026	3.98e-06	3.18e-05	3.62508	MCCC2	no
HDAC1	0.42917	10.482	4.78769	4.03e-06	3.21e-05	3.61442	HDAC1	no
ANLN	0.405799	4.75883	4.78716	4.04e-06	3.22e-05	3.61224	ANLN	no
SPG20	-0.460698	6.69235	-4.78596	4.06e-06	3.23e-05	3.60727	SPG20	no
CPNE4	0.659733	8.58884	4.78511	4.07e-06	3.24e-05	3.60374	CPNE4	no
NCDN	0.244295	6.48028	4.7837	4.1e-06	3.26e-05	3.59792	NCDN	no
ACTR3B	0.342971	6.00391	4.78276	4.12e-06	3.27e-05	3.59403	ACTR3B	no
PGM1	-0.386546	8.78918	-4.78244	4.12e-06	3.28e-05	3.5927	PGM1	no
GPRC6A	-0.266297	4.29042	-4.78121	4.14e-06	3.29e-05	3.5876	GPRC6A	no
SLC12A7	0.259076	5.70245	4.77963	4.17e-06	3.31e-05	3.58108	SLC12A7	no
CYYR1	-0.48337	6.33391	-4.77951	4.17e-06	3.31e-05	3.58057	CYYR1	no
FARSA	0.290905	7.76672	4.77894	4.18e-06	3.32e-05	3.57823	FARSA	no
HLCS	0.372358	6.4641	4.77836	4.19e-06	3.32e-05	3.57582	HLCS	no
SLC25A17	0.384863	6.73093	4.77829	4.2e-06	3.32e-05	3.57554	SLC25A17	no
MDM1	-0.302622	6.17551	-4.77803	4.2e-06	3.33e-05	3.57447	MDM1	no
PIPOX	-0.471272	4.85296	-4.77557	4.24e-06	3.36e-05	3.56431	PIPOX	no
PLA2G4D	-0.638477	4.73692	-4.77487	4.26e-06	3.37e-05	3.56138	PLA2G4D	no
MT1X	-0.820844	10.4254	-4.77428	4.27e-06	3.38e-05	3.55895	MT1X	no
SCARB2	0.430735	9.12463	4.77173	4.32e-06	3.41e-05	3.54842	SCARB2	no
OR7E37P	0.430221	8.48725	4.77123	4.33e-06	3.42e-05	3.54635	OR7E37P	no
CCBL2	0.25312	7.12058	4.771	4.33e-06	3.42e-05	3.5454	CCBL2	no
SMAP2	0.3171	9.37741	4.76985	4.35e-06	3.43e-05	3.54068	SMAP2	no
HEY1	-0.530662	6.79268	-4.76809	4.38e-06	3.46e-05	3.53341	HEY1	no
APOC2	0.438027	4.93167	4.76684	4.41e-06	3.47e-05	3.52825	APOC2	no
SYNE1	-0.27475	6.21232	-4.76571	4.43e-06	3.49e-05	3.52355	SYNE1	no
PLEKHA1	-0.287283	6.52608	-4.76469	4.45e-06	3.5e-05	3.51937	PLEKHA1	no
FASN	0.387188	11.304	4.76263	4.49e-06	3.53e-05	3.51084	FASN	no
KIF20A	0.40708	4.59086	4.76194	4.5e-06	3.54e-05	3.50801	KIF20A	no
GPSM2	-0.322718	6.5065	-4.76137	4.51e-06	3.55e-05	3.50566	GPSM2	no
SPR	0.316288	6.59396	4.761	4.52e-06	3.55e-05	3.50414	SPR	no
CAMK2D	-0.404205	7.29446	-4.75931	4.55e-06	3.58e-05	3.49717	CAMK2D	no
MRPL13	0.523427	8.33381	4.75795	4.58e-06	3.59e-05	3.49157	MRPL13	no
NDUFV2	0.487773	9.32879	4.75783	4.58e-06	3.59e-05	3.49108	NDUFV2	no
AFMID	0.333586	6.9452	4.75731	4.59e-06	3.6e-05	3.48895	AFMID	no
ZNF613	0.479114	7.89196	4.7567	4.6e-06	3.61e-05	3.4864	ZNF613	no
NPM3	0.554816	7.33292	4.75663	4.61e-06	3.61e-05	3.48613	NPM3	no
ADORA1	0.152681	4.81167	4.75652	4.61e-06	3.61e-05	3.48568	ADORA1	no
IL11RA	-0.344328	7.16668	-4.75625	4.61e-06	3.61e-05	3.48455	IL11RA	no
CDCA5	0.59285	5.25025	4.75606	4.62e-06	3.61e-05	3.48379	CDCA5	no
KSR1	-0.334078	5.57708	-4.75225	4.69e-06	3.67e-05	3.46807	KSR1	no
GTPBP3	0.301872	6.7113	4.75208	4.7e-06	3.67e-05	3.46737	GTPBP3	no
LCORL	0.352267	5.8978	4.75158	4.71e-06	3.67e-05	3.46534	LCORL	no
RANGAP1	0.294029	8.07897	4.75052	4.73e-06	3.69e-05	3.46096	RANGAP1	no
ZDHHC17	-0.341234	8.19149	-4.74587	4.82e-06	3.76e-05	3.44184	ZDHHC17	no
SNORD114-3	-0.531007	6.11302	-4.7454	4.83e-06	3.77e-05	3.4399	SNORD114-3	no
WDFY2	-0.317268	6.037	-4.74299	4.88e-06	3.8e-05	3.42998	WDFY2	no
LPHN3	-0.141665	4.31755	-4.74286	4.89e-06	3.8e-05	3.42943	LPHN3	no
NT5E	-0.400143	6.17178	-4.74252	4.89e-06	3.81e-05	3.42804	NT5E	no
CEP78	0.265632	5.52625	4.74252	4.89e-06	3.81e-05	3.42803	CEP78	no
NARS2	0.436436	7.7707	4.74216	4.9e-06	3.81e-05	3.42658	NARS2	no
CD38	-1.19219	7.13458	-4.74148	4.91e-06	3.82e-05	3.42379	CD38	down
FAM114A2	0.272368	6.9385	4.74126	4.92e-06	3.82e-05	3.42288	FAM114A2	no
KRBA1	-0.286962	8.32681	-4.74102	4.92e-06	3.82e-05	3.4219	KRBA1	no
RPN1	0.2068	10.4634	4.74027	4.94e-06	3.83e-05	3.41881	RPN1	no
L3MBTL3	0.46555	6.09909	4.73892	4.97e-06	3.85e-05	3.41325	L3MBTL3	no
GAN	-0.464094	6.82773	-4.73867	4.97e-06	3.86e-05	3.41221	GAN	no
TBC1D15	0.354436	8.33397	4.73814	4.99e-06	3.86e-05	3.41005	TBC1D15	no
ZFAND1	0.331408	8.37488	4.73746	5e-06	3.87e-05	3.40726	ZFAND1	no
LMX1B	0.378891	4.57979	4.73397	5.08e-06	3.93e-05	3.39291	LMX1B	no
CAST	-0.248576	8.60255	-4.7338	5.08e-06	3.93e-05	3.3922	CAST	no
LDLRAD3	0.498863	8.94233	4.73359	5.08e-06	3.93e-05	3.39136	LDLRAD3	no
NFIL3	-0.610468	9.95231	-4.73185	5.12e-06	3.96e-05	3.38422	NFIL3	no
SLCO4A1	0.171478	4.84042	4.73139	5.13e-06	3.96e-05	3.38234	SLCO4A1	no
SP140L	-0.317056	5.82565	-4.73095	5.14e-06	3.97e-05	3.3805	SP140L	no
PHF1	-0.310159	9.44105	-4.72896	5.19e-06	4e-05	3.37235	PHF1	no
SP8	-0.61397	5.90007	-4.72798	5.21e-06	4.02e-05	3.36832	SP8	no
MCAM	-0.579101	7.5933	-4.72787	5.21e-06	4.02e-05	3.3679	MCAM	no
FBXL18	0.231247	6.33193	4.72762	5.22e-06	4.02e-05	3.36686	FBXL18	no
TMED9	0.274106	9.92743	4.72447	5.29e-06	4.07e-05	3.35392	TMED9	no
PUS7	0.60389	7.12048	4.72344	5.31e-06	4.09e-05	3.3497	PUS7	no
TCEAL3	-0.235662	11.3577	-4.72297	5.32e-06	4.09e-05	3.34777	TCEAL3	no
WDR1	-0.327818	9.07423	-4.71965	5.4e-06	4.15e-05	3.33417	WDR1	no
QKI	-0.252142	6.95307	-4.71882	5.42e-06	4.16e-05	3.33076	QKI	no
MANBAL	-0.360654	8.56986	-4.71857	5.42e-06	4.16e-05	3.32974	MANBAL	no
FHL1	-0.579587	7.70181	-4.71699	5.46e-06	4.19e-05	3.32328	FHL1	no
FAR2	0.262343	5.09305	4.71124	5.59e-06	4.29e-05	3.29974	FAR2	no
LARP1	0.258324	7.96795	4.7111	5.6e-06	4.29e-05	3.29917	LARP1	no
2025-03-02	-0.333642	6.60718	-4.70455	5.76e-06	4.41e-05	3.27237	2025-03-02	no
RASSF2	0.42165	6.03695	4.70368	5.78e-06	4.42e-05	3.26885	RASSF2	no
DIRAS3	-0.292928	4.8691	-4.70249	5.81e-06	4.45e-05	3.26399	DIRAS3	no
LILRB5	0.296367	4.86313	4.70223	5.81e-06	4.45e-05	3.26291	LILRB5	no
OGFRL1	-0.355671	7.01195	-4.70162	5.83e-06	4.46e-05	3.26042	OGFRL1	no
CDK5R1	0.32218	4.97418	4.70123	5.84e-06	4.46e-05	3.25884	CDK5R1	no
FAM86A	0.239681	6.14053	4.7011	5.84e-06	4.46e-05	3.25829	FAM86A	no
SRFBP1	0.356082	5.82482	4.70079	5.85e-06	4.47e-05	3.25703	SRFBP1	no
CBR3	0.514992	7.28364	4.70001	5.87e-06	4.48e-05	3.25385	CBR3	no
NOL4	0.463165	4.45475	4.69871	5.9e-06	4.5e-05	3.24854	NOL4	no
TP53INP2	-0.458824	9.44073	-4.6983	5.91e-06	4.51e-05	3.24686	TP53INP2	no
PCP4	-0.613568	11.3111	-4.69778	5.92e-06	4.51e-05	3.24471	PCP4	no
STAC2	-0.39751	4.92273	-4.69763	5.93e-06	4.52e-05	3.24411	STAC2	no
PLCH2	-0.345242	6.79823	-4.69615	5.97e-06	4.54e-05	3.23808	PLCH2	no
LTBP4	-0.357659	9.99814	-4.69523	5.99e-06	4.56e-05	3.23431	LTBP4	no
PDE6G	0.220247	4.62427	4.69475	6e-06	4.56e-05	3.23238	PDE6G	no
SPIN4	0.51155	9.73751	4.69462	6e-06	4.56e-05	3.23182	SPIN4	no
SIK3	-0.289594	7.60003	-4.69359	6.03e-06	4.58e-05	3.22761	SIK3	no
PABPC4L	-0.521463	7.57731	-4.69349	6.03e-06	4.58e-05	3.22721	PABPC4L	no
GUCY1B3	0.561747	6.28333	4.69303	6.05e-06	4.59e-05	3.22534	GUCY1B3	no
TOM1L1	0.342886	6.03081	4.6923	6.06e-06	4.6e-05	3.22236	TOM1L1	no
WHSC1	0.243378	5.48519	4.69107	6.1e-06	4.62e-05	3.21735	WHSC1	no
IFI27L1	0.553595	8.45627	4.6893	6.14e-06	4.65e-05	3.21011	IFI27L1	no
TMEM184A	0.427047	6.51391	4.68858	6.16e-06	4.67e-05	3.20718	TMEM184A	no
NAT1	-0.823475	5.68494	-4.6879	6.18e-06	4.68e-05	3.20444	NAT1	no
MYH13	0.231269	4.28802	4.68775	6.18e-06	4.68e-05	3.20382	MYH13	no
KIF4A	0.482231	4.45708	4.68727	6.2e-06	4.69e-05	3.20184	KIF4A	no
SAC3D1	0.395125	8.73848	4.68716	6.2e-06	4.69e-05	3.20138	SAC3D1	no
ADHFE1	-0.521752	8.11453	-4.687	6.2e-06	4.69e-05	3.20074	ADHFE1	no
SV2C	0.413238	4.70736	4.68656	6.21e-06	4.69e-05	3.19894	SV2C	no
SUMF2	-0.237481	11.2908	-4.68621	6.22e-06	4.7e-05	3.19751	SUMF2	no
FBLIM1	-0.32622	6.41324	-4.6837	6.29e-06	4.74e-05	3.18731	FBLIM1	no
STAT5B	-0.22797	7.21319	-4.6832	6.3e-06	4.75e-05	3.18526	STAT5B	no
CCDC149	0.416477	6.78135	4.68163	6.35e-06	4.78e-05	3.17888	CCDC149	no
PCMT1	-0.191363	11.5228	-4.68027	6.38e-06	4.81e-05	3.17335	PCMT1	no
KCTD9	-0.380092	8.55356	-4.67991	6.39e-06	4.81e-05	3.17189	KCTD9	no
MIOS	0.288576	8.61195	4.67948	6.4e-06	4.82e-05	3.17011	MIOS	no
GPNMB	0.446372	6.59818	4.67883	6.42e-06	4.83e-05	3.16745	GPNMB	no
FBXW8	0.232358	5.4728	4.67867	6.43e-06	4.83e-05	3.16684	FBXW8	no
BCL2L12	0.323589	6.50576	4.67825	6.44e-06	4.84e-05	3.16511	BCL2L12	no
DUSP10	-0.516975	6.19743	-4.67792	6.45e-06	4.84e-05	3.16375	DUSP10	no
OSR2	-0.431435	7.04639	-4.6775	6.46e-06	4.85e-05	3.16204	OSR2	no
ZNF532	-0.653458	9.93131	-4.67716	6.47e-06	4.85e-05	3.16066	ZNF532	no
2025-03-09	0.331903	5.80271	4.67562	6.51e-06	4.88e-05	3.15441	2025-03-09	no
PCNP	-0.263998	10.425	-4.67525	6.52e-06	4.89e-05	3.1529	PCNP	no
MBOAT2	0.547144	7.07739	4.67395	6.56e-06	4.91e-05	3.1476	MBOAT2	no
CDK2	0.223021	6.36467	4.67105	6.64e-06	4.97e-05	3.1358	CDK2	no
S100A2	-1.07585	5.8674	-4.6687	6.7e-06	5.02e-05	3.12627	S100A2	down
SNRPB	0.307359	9.59059	4.66858	6.71e-06	5.02e-05	3.12579	SNRPB	no
ADRBK2	-0.355679	9.41262	-4.6665	6.77e-06	5.06e-05	3.11734	ADRBK2	no
LHFPL2	-0.348222	6.41439	-4.66635	6.77e-06	5.06e-05	3.11671	LHFPL2	no
GNG12	-0.348474	9.77275	-4.6661	6.78e-06	5.06e-05	3.11569	GNG12	no
PNCK	-0.485256	8.47628	-4.66589	6.78e-06	5.06e-05	3.11484	PNCK	no
ELF1	-0.372876	8.58478	-4.66542	6.8e-06	5.07e-05	3.11292	ELF1	no
AMT	-0.65053	9.10532	-4.66212	6.89e-06	5.14e-05	3.09955	AMT	no
AQP4	-0.169485	4.24679	-4.66208	6.9e-06	5.14e-05	3.09936	AQP4	no
CITED1	-0.970765	6.58521	-4.66045	6.94e-06	5.17e-05	3.09276	CITED1	no
[truncated: 12,891 more rows]
