# Supplementary material for: A diagnosis model for prostate adenocarcinoma based on hub genes targeted by sulforaphane
Source: Research Square preprint supplement (doi:10.21203/rs.3.rs-7993444/v1), 2025-12-12
Supplement: Supplementary file 4 [file 35caa0b631dc221130d2301c.docx]

**Table 5 Result of GO and KEGG Enrichment Analysis for Hub Genes**

| ONTOLOGY | ID | Description | GeneRatio | BgRatio | pvalue | p.adjust | qvalue |
| --- | --- | --- | --- | --- | --- | --- | --- |
| BP | GO:0035066 | positive regulation of histone acetylation | 2/9 | 30/18614 | 8.98E-05 | 8.98E-05 | 1.04E-02 |
| BP | GO:2000758 | positive regulation of peptidyl-lysine acetylation | 2/9 | 36/18614 | 1.30E-04 | 1.30E-04 | 1.04E-02 |
| BP | GO:0045444 | fat cell differentiation | 3/9 | 246/18614 | 1.81E-04 | 1.81E-04 | 1.04E-02 |
| BP | GO:1901985 | positive regulation of protein acetylation | 2/9 | 47/18614 | 2.22E-04 | 2.22E-04 | 1.04E-02 |
| BP | GO:0035065 | regulation of histone acetylation | 2/9 | 53/18614 | 2.83E-04 | 2.83E-04 | 1.04E-02 |
| CC | GO:0005604 | basement membrane | 2/9 | 84/19518 | 6.46E-04 | 6.46E-04 | 1.63E-02 |
| CC | GO:0031674 | I band | 2/9 | 141/19518 | 1.80E-03 | 1.80E-03 | 2.28E-02 |
| CC | GO:0030017 | sarcomere | 2/9 | 213/19518 | 4.06E-03 | 4.06E-03 | 2.65E-02 |
| CC | GO:0030016 | myofibril | 2/9 | 233/19518 | 4.83E-03 | 4.83E-03 | 2.65E-02 |
| CC | GO:0043292 | contractile fiber | 2/9 | 243/19518 | 5.25E-03 | 5.25E-03 | 2.65E-02 |
| MF | GO:0005201 | extracellular matrix structural constituent | 2/9 | 167/18369 | 2.84E-03 | 2.84E-03 | 4.13E-02 |
| MF | GO:0008301 | DNA binding, bending | 1/9 | 18/18369 | 8.79E-03 | 8.79E-03 | 4.13E-02 |
| MF | GO:0098641 | cadherin binding involved in cell-cell adhesion | 1/9 | 18/18369 | 8.79E-03 | 8.79E-03 | 4.13E-02 |
| MF | GO:0001227 | DNA-binding transcription repressor activity, RNA polymerase II-specific | 2/9 | 303/18369 | 9.04E-03 | 9.04E-03 | 4.13E-02 |
| MF | GO:0001217 | DNA-binding transcription repressor activity | 2/9 | 308/18369 | 9.33E-03 | 9.33E-03 | 4.13E-02 |
| KEGG | hsa04512 | ECM-receptor interaction | 2/7 | 89/8661 | 2.12E-03 | 2.12E-03 | 2.24E-02 |
| KEGG | hsa05222 | Small cell lung cancer | 2/7 | 92/8661 | 2.26E-03 | 2.26E-03 | 2.24E-02 |

GO，Gene Ontology；BP，Biological Process；CC，Cellular Component；MF，Molecular Function；KEGG，Kyoto Encyclopedia of Genes and Genomes。
