# Supplementary material for: A diagnosis model for prostate adenocarcinoma based on hub genes targeted by sulforaphane
Source: Research Square preprint supplement (doi:10.21203/rs.3.rs-7993444/v1), 2025-12-12
Supplement: Supplementary file 5 [file 5a3b8a6682ebf423df270cb0.docx]

**Table 4 Result of GO and KEGG Enrichment Analysis for MCODE Subnetwork Genes**

| ONTOLOGY | ID | Description | GeneRatio | BgRatio | pvalue | p.adjust | qvalue |
| --- | --- | --- | --- | --- | --- | --- | --- |
| BP | GO:0035066 | positive regulation of histone acetylation | 2/7 | 30/18614 | 5.25E-05 | 5.25E-05 | 6.60E-03 |
| BP | GO:2000758 | positive regulation of peptidyl-lysine acetylation | 2/7 | 36/18614 | 7.59E-05 | 7.59E-05 | 6.60E-03 |
| BP | GO:1901985 | positive regulation of protein acetylation | 2/7 | 47/18614 | 1.30E-04 | 1.30E-04 | 6.60E-03 |
| BP | GO:0035065 | regulation of histone acetylation | 2/7 | 53/18614 | 1.66E-04 | 1.66E-04 | 6.60E-03 |
| BP | GO:0072132 | mesenchyme morphogenesis | 2/7 | 57/18614 | 1.92E-04 | 1.92E-04 | 6.60E-03 |
| CC | GO:0031674 | I band | 2/7 | 141/19518 | 1.06E-03 | 1.06E-03 | 1.47E-02 |
| CC | GO:0030017 | sarcomere | 2/7 | 213/19518 | 2.40E-03 | 2.40E-03 | 1.47E-02 |
| CC | GO:0030016 | myofibril | 2/7 | 233/19518 | 2.86E-03 | 2.86E-03 | 1.47E-02 |
| CC | GO:0043292 | contractile fiber | 2/7 | 243/19518 | 3.11E-03 | 3.11E-03 | 1.47E-02 |
| CC | GO:0031430 | M band | 1/7 | 20/19518 | 7.15E-03 | 7.15E-03 | 2.37E-02 |
| MF | GO:0005212 | structural constituent of eye lens | 1/7 | 23/18369 | 8.73E-03 | 8.73E-03 | 6.56E-02 |
| MF | GO:0000146 | microfilament motor activity | 1/7 | 36/18369 | 1.36E-02 | 1.36E-02 | 6.56E-02 |
| MF | GO:0030020 | extracellular matrix structural constituent conferring tensile strength | 1/7 | 41/18369 | 1.55E-02 | 1.55E-02 | 6.56E-02 |
| MF | GO:0070888 | E-box binding | 1/7 | 48/18369 | 1.82E-02 | 1.82E-02 | 6.56E-02 |
| MF | GO:0030374 | nuclear receptor coactivator activity | 1/7 | 55/18369 | 2.08E-02 | 2.08E-02 | 6.56E-02 |
| KEGG | hsa04213 | Longevity regulating pathway - multiple species | 1/6 | 61/8661 | 4.15E-02 | 4.15E-02 | 1.39E-01 |
| KEGG | hsa04920 | Adipocytokine signaling pathway | 1/6 | 70/8661 | 4.75E-02 | 4.75E-02 | 1.39E-01 |

GO，Gene Ontology；BP，Biological Process；CC，Cellular Component；MF，Molecular Function；KEGG，Kyoto Encyclopedia of Genes and Genomes。
