# Supplementary material for: A diagnosis model for prostate adenocarcinoma based on hub genes targeted by sulforaphane
Source: Research Square preprint supplement (doi:10.21203/rs.3.rs-7993444/v1), 2025-12-12
Supplement: Supplementary file 6 [file 6c5efafe5f1427108cb069cc.xlsx]

## Sheet: Sheet2
Intersection Genes
AR
CDH1
CCND1
KLK3
TP53
CDKN1A
NDRG1
COMT
PARP1
CYP1A1
CYP1B1
CYP3A4
CYP19A1
NQO1
DNMT1
DNMT3B
EGFR
AHR
AKT1
ERG
ESR1
ESR2
ETV4
SIRT1
NR3C1
GSK3B
GSTM1
GSTP1
GSTT1
HIF1A
HMOX1
IL6
CXCL8
MME
NFE2L2
NOS3
PIK3CD
PLAU
MAPK3
BCL2
STAT3
AURKA
TERT
TLR4
VEGFA
VIM
CASP9
AKR1C3
TNFSF10
MBD2
ETV5
ANXA1
ICAM1
JAK2
SELENOP
IDH1
MPO
BAX
TOP2A
TLR6
ALOX5
NGFR
TNFRSF10A
EPHX1
EHF
RB1
STEAP4
HDAC6
CLDN7
GADD45A
GSTA1
IGF2R
FASLG
MIF
VCP
CSRP1
HPGD
JAK1
ARG2
BAD
TIMP4
CAPNS1
LITAF
SPON2
CRYAB
CYP2C19
SSBP2
PHGDH
HNRNPH1
ID3
CASZ1
PTPRC
ABCG5
TAP1
PDZK1IP1
STARD10
ANTXR2
CNN3
COL5A1
CYP2A6
CYP11B2
EMP3
TJP3
TNFRSF21
INS
JUP
ACHE
P4HB
PITX3
ACSM3
TMOD1
CUL3
CREG1
KEAP1
PDGFRB
CASP8
PLCL1
KRT8
MAP2K1
F13A1
HLA-B
GSR
ADGRG1
CD24
MAPK14
CSF2
E2F1
EDNRA
PTK2B
FASN
ALOX15
STEAP1
DKK3
HPGDS
GPX1
PSAT1
HDAC1
HSPA4
XIAP
HSP90AA1
IL1B
CD82
KDR
STS
MAOA
MCL1
MGMT
MMP2
MUC1
NFKB1
NOTCH1
PCNA
ABCB1
PIK3CG
PLK1
PPARG
MAPK1
MAPK8
PCBP4
RELA
ACTB
S100A9
CCL2
SNAI2
SOX4
SOX9
SPP1
SRC
SREBF1
ZEB1
TIMP1
TNF
CCR2
CASP3
NR1I2
HSPB3
KLF4
HDAC9
ITGB7
JUND
TTC7A
SLCO2A1
TBX1
MOB3B
ETS2
F3
S100A8
MAP2K4
TIMP2
TNFRSF10B
SQSTM1
ADM
DKK1
NGF
CDK2
E2F3
HOXC6
SATB1
SGK1
BMP2
PTTG1
TP73
GPRC5A
PPARGC1A
CXCL1
FAS
LGALS1
TLR9
BDNF
S100A4
CDK1
NME1
AKR1C2
DUSP1
ERCC5
ALDH1A1
FGFR3
PEG10
INHA
NOS2
PRDX1
UGT1A1
PRKCA
PRKCB
TGFBR1
TXN
NCOR2
ZEB2
HPSE
NTRK1
PLAT
BTG2
SEMA3C
IFI44
DAB2
DCN
DDIT3
ALPP
GPC1
GPER1
HMMR
HNRNPK
NOTCH3
PRLR
SOD1
HMGA2
CCNB1
SLC16A4
CTSK
RBMS3
HP
PTGS1
CA9
OLFM4
CYP1A2
A2M
FAP
FHL2
ELL2
GLO1
GSN
HDAC2
HSPD1
AQP3
P2RX7
XAF1
ADAM17
TGM2
FOSL1
CCNA1
NOG
FGF1
FTH1
SCD
TGFB3
PARP2
CDK8
AKR1A1
PRDX3
CCR4
MAP3K8
ALCAM
ALDH1A3
FOXC2
KDM4C
ALPI
H1-0
HSF1
TNC
ITGA6
ISG20
LAMB3
LAMP2
RPSA
NTRK2
OLR1
PBX1
PITX1
CAMK2N1
PRG2
MAPK9
BCL2L1
CXCR5
TRPS1
TXNRD1
VTN
CAPG
BHLHE40
PDE5A
USP2
PCLAF
G3BP2
CDC20
IL11
DNM1L
CEBPD
NES
CHRM1
MGLL
PLK3
CRYZ
CTSL
DNMT3A
EP300
EPHA7
FECH
TRIM29
GABARAPL1
FTL
RASGRP3
LRIG1
AMH
BBC3
GPLD1
GPX4
GRB10
HPR
HSPA1B
HSPA1L
ITGA2
ITGAM
VGLL3
CYP4F3
MT1G
MYB
NQO2
F11R
ANGPTL4
LIMA1
SARS2
CEP55
BAG1
NDRG3
PCDH10
RGS2
SAT1
SDCBP
VSIR
SLC1A5
SLC2A3
SPINT1
TBX15
BUB1
ACTC1
TTPA
XBP1
SRD5A3
MAP1LC3B
DGAT1
TNFRSF10D
HDAC3
KAT2B
CCND3
TRPA1
CCNE2
MSC
DLGAP5
MVP
AK6
GCLC
IL4R
MARCKS
NFKBIA
ADA
ABCB6
CDH10
CDKN1C
CITED2
TUBB4B
CLGN
ZBTB18
CCT2
TRIM16
MALT1
YWHAQ
ADIRF
DUSP10
SYNPO
TENT5B
CKS2
ANKRD22
CCR1
ABCC2
COL1A1
TSHZ2
COL4A6
CPD
CRABP2
PROM2
CYBB
AMOTL1
SPRED1
DDB2
DES
DIO2
DUSP5
DUSP6
TYMP
EIF2S1
PAOX
EIF5A
ELANE
ELF3
SPRED2
ENDOG
ERCC4
FAAH
ALDH3A1
GPC5
COBLL1
PLA2R1
SIRT2
PTGR1
PDZD2
SEPTIN6
FLT3
SLC7A11
G6PD
ADGRA2
PTPN22
GATM
NAAA
SFN
HHEX
HLA-C
HLA-G
HNRNPC
AGFG2
HSD11B1
BIRC3
HSPA2
HSPA9
ID2
IFIT3
SLCO4C1
TNFRSF9
IRF7
MXD1
MB
MEOX1
MGAT5
ASS1
MT1E
MTNR1A
MYLK
NCAM2
P2RY2
ATP5F1B
PCK2
CPA4
PCSK1
CYP39A1
PLAC8
PRRX2
PDGFB
ENPP2
PLD1
DGCR8
APBB1IP
LPCAT2
PACC1
DEPDC1
SULF2
PRTN3
EIF5A2
LXN
PSMB6
AKR1B10
BACH1
PELI1
SALL4
STAMBPL1
PTPN12
PTX3
RHOU
RXFP1
BCL2A1
RIT1
BCL3
RPS6
SAA1
SCN1A
CCL20
BID
IFIH1
POPDC3
DEPTOR
SKIL
SLC2A5
NCF1
SOX15
BST1
TBXA2R
TFAM
TGM1
SERPING1
TTK
VCAM1
VIPR2
SEMA3B
DHRS11
RTL10
TMC5
CEP70
KIF18A
FZD7
ARID5B
RSPO3
PIK3R3
ABCC3
CD84
CCNA2
RHBDL1
SYT7
IL32
CD14
FOXQ1
BAG3
APOBEC3B
CREB5
MICAL2
CD68
ADGRE5
SV2B
KIF14
CDC25B
UPK3B
CTNND1
FHL1
FOLR1
GCHFR
GCLM
MLXIPL
DUSP16
