# Supplementary material for: A diagnosis model for prostate adenocarcinoma based on hub genes targeted by sulforaphane
Source: Research Square preprint supplement (doi:10.21203/rs.3.rs-7993444/v1), 2025-12-12
Supplement: Supplementary file 7 [file 7811ccb9da65b70acf37fb5e.xlsx]

## Sheet: Table S4
genes	baseMean	log2FoldChange	lfcSE	stat	pvalue	padj	gene_symbol	group
MFSD2A	579.571	-6.01783	0.221201	-27.2052	5.63e-163	2.26e-158	MFSD2A	down
SERPINA5	972.758	-6.81264	0.255884	-26.624	3.58e-156	7.18e-152	SERPINA5	down
ACSL6	162.362	-4.96945	0.195819	-25.3778	4.44e-142	5.93e-138	ACSL6	down
MCF2	99.1121	-5.32749	0.218946	-24.3324	8.9e-131	8.92e-127	MCF2	down
AKR1B1	2764.5	-3.93024	0.162444	-24.1944	2.55e-129	2.04e-125	AKR1B1	down
PKD1L2	51.1261	-5.93828	0.247306	-24.0119	2.09e-127	1.4e-123	PKD1L2	down
EMX2	242.636	-6.8219	0.29026	-23.5027	3.83e-122	2.19e-118	EMX2	down
HOXB8	111.022	-6.32096	0.270157	-23.3974	4.55e-121	2.28e-117	HOXB8	down
CLDN2	490.602	-7.97273	0.343303	-23.2236	2.63e-119	1.17e-115	CLDN2	down
SPINK2	338.584	-7.46808	0.330096	-22.624	2.52e-113	1.01e-109	SPINK2	down
KLHL14	143.659	-4.29404	0.193965	-22.1382	1.35e-108	4.93e-105	KLHL14	down
NDRG4	413.487	-3.40789	0.154364	-22.077	5.26e-108	1.76e-104	NDRG4	down
EMX2OS	310.708	-6.02713	0.276465	-21.8007	2.28e-105	7.04e-102	EMX2OS	down
WNT9B	59.8954	-4.61041	0.219101	-21.0424	2.68e-98	7.69e-95	WNT9B	down
RASL10B	215.025	-3.52574	0.167831	-21.0077	5.58e-98	1.49e-94	RASL10B	down
PATE2	63.2983	-5.49353	0.262239	-20.9486	1.93e-97	4.84e-94	PATE2	down
CRTAC1	298.865	-4.35954	0.211805	-20.5828	3.91e-94	9.22e-91	CRTAC1	down
SLC2A9	259.631	-2.75168	0.136207	-20.2022	9.36e-91	2.08e-87	SLC2A9	down
CYP19A1	13.1715	-4.64875	0.230728	-20.1482	2.79e-90	5.89e-87	CYP19A1	down
LINC01116	51.9974	-3.59989	0.181348	-19.8507	1.09e-87	2.18e-84	LINC01116	down
CYSLTR2	105.438	-3.77982	0.190735	-19.8171	2.12e-87	4.04e-84	CYSLTR2	down
ANO7L1	44.0938	-2.46856	0.12746	-19.3673	1.46e-83	2.65e-80	ANO7L1	down
ANO1	1885.97	-2.88467	0.151207	-19.0776	3.88e-81	6.76e-78	ANO1	down
TMEM114	75.5781	-9.1076	0.477677	-19.0664	4.8e-81	8.02e-78	TMEM114	down
ANXA13	99.9911	-5.57432	0.292741	-19.0418	7.68e-81	1.23e-77	ANXA13	down
PIP	4789.78	-7.40204	0.391259	-18.9185	8.03e-80	1.24e-76	PIP	down
LINC02137	10.0137	-5.35222	0.283437	-18.8833	1.56e-79	2.32e-76	LINC02137	down
LINC00839	45.7993	-4.19299	0.222709	-18.8272	4.52e-79	6.47e-76	LINC00839	down
CA2	360.264	-4.4971	0.238961	-18.8194	5.24e-79	7.24e-76	CA2	down
SPINK13	26.6738	-5.51579	0.293919	-18.7663	1.42e-78	1.9e-75	SPINK13	down
KCNJ5	417.434	-3.17117	0.169256	-18.736	2.52e-78	3.26e-75	KCNJ5	down
ABCG2	821.519	-2.86633	0.153415	-18.6834	6.75e-78	8.46e-75	ABCG2	down
MGAM	60.7067	-4.78238	0.256251	-18.6629	9.93e-78	1.21e-74	MGAM	down
PAQR8	671.168	-2.62524	0.141019	-18.6162	2.38e-77	2.8e-74	PAQR8	down
C3orf36	65.3566	-3.56693	0.191863	-18.591	3.8e-77	4.35e-74	C3orf36	down
KCP	90.6189	-3.03439	0.164213	-18.4785	3.08e-76	3.43e-73	KCP	down
BX571818.1	29.1847	-5.08657	0.277768	-18.3123	6.6e-75	7.15e-72	BX571818.1	down
AC012123.1	8.2205	-4.68509	0.256955	-18.2331	2.82e-74	2.97e-71	AC012123.1	down
MRO	42.6257	-3.15688	0.174176	-18.1247	2.04e-73	2.09e-70	MRO	down
EPHA10	573.53	2.11724	0.118066	17.9327	6.55e-72	6.57e-69	EPHA10	up
WWC3	2639.77	-1.42982	0.0799319	-17.8879	1.46e-71	1.43e-68	WWC3	down
KIRREL3	26.9165	-3.07813	0.173965	-17.694	4.67e-70	4.46e-67	KIRREL3	down
NKX2-3	96.939	4.28192	0.244213	17.5335	7.95e-69	7.41e-66	NKX2-3	up
PATE4	498.291	-9.26158	0.529316	-17.4973	1.5e-68	1.37e-65	PATE4	down
AL354793.1	4.75448	-5.63361	0.322016	-17.4948	1.57e-68	1.4e-65	AL354793.1	down
AC011751.1	9.32426	-4.84642	0.277712	-17.4513	3.37e-68	2.93e-65	AC011751.1	down
PTGES	1317.2	-3.09326	0.177317	-17.4449	3.77e-68	3.21e-65	PTGES	down
SLC16A12	55.2911	-3.80734	0.218314	-17.4398	4.12e-68	3.44e-65	SLC16A12	down
ATP13A4	49.6405	-4.60337	0.265202	-17.358	1.72e-67	1.41e-64	ATP13A4	down
CHEK1	377.844	-2.39014	0.139091	-17.1839	3.5e-66	2.81e-63	CHEK1	down
STAC2	559.37	-4.46765	0.260105	-17.1763	3.99e-66	3.14e-63	STAC2	down
PLA2G4A	592.378	-2.36336	0.138087	-17.115	1.15e-65	8.84e-63	PLA2G4A	down
PNMT	103.986	-4.74655	0.278213	-17.0608	2.9e-65	2.2e-62	PNMT	down
LAPTM4A	16004.1	-1.0356	0.0607491	-17.0473	3.66e-65	2.72e-62	LAPTM4A	down
ABHD6	453.344	-1.4006	0.0822318	-17.0323	4.73e-65	3.45e-62	ABHD6	down
GSTM3	2003.35	-2.34027	0.138401	-16.9093	3.84e-64	2.75e-61	GSTM3	down
FRMD3	266.227	-2.29319	0.135988	-16.8632	8.39e-64	5.9e-61	FRMD3	down
AQP2	923.632	-9.34507	0.55503	-16.8371	1.31e-63	9.02e-61	AQP2	down
HPN	12165.5	2.46877	0.146655	16.8338	1.38e-63	9.37e-61	HPN	up
ZPLD2P	11.3541	-3.84142	0.230838	-16.6412	3.51e-62	2.34e-59	ZPLD2P	down
SLC45A2	371.842	5.05679	0.304936	16.5831	9.23e-62	6.07e-59	SLC45A2	up
CRISP1	161.632	-8.77108	0.529035	-16.5794	9.82e-62	6.35e-59	CRISP1	down
EVA1A	51.9933	-2.66136	0.161273	-16.5022	3.54e-61	2.25e-58	EVA1A	down
FUT3	66.4233	-4.16894	0.252889	-16.4853	4.68e-61	2.93e-58	FUT3	down
PAEP	233.015	-9.31424	0.56609	-16.4536	7.9e-61	4.87e-58	PAEP	down
AL022151.1	24.1608	-6.13325	0.37281	-16.4514	8.19e-61	4.98e-58	AL022151.1	down
GCNT4	133.72	-2.48179	0.150901	-16.4465	8.88e-61	5.25e-58	GCNT4	down
HPN-AS1	127.621	3.13294	0.190494	16.4464	8.9e-61	5.25e-58	HPN-AS1	up
PRDM16	89.484	-2.64473	0.161184	-16.4082	1.67e-60	9.72e-58	PRDM16	down
FAM83A	49.3967	-5.17509	0.315564	-16.3995	1.93e-60	1.1e-57	FAM83A	down
SLC13A2	106.488	-6.36592	0.391616	-16.2555	2.04e-59	1.15e-56	SLC13A2	down
SNAP25	214.689	-3.11931	0.192356	-16.2163	3.87e-59	2.15e-56	SNAP25	down
PCAT7	356.596	2.58446	0.159401	16.2136	4.04e-59	2.22e-56	PCAT7	up
PAX2	66.455	-4.14904	0.257071	-16.1397	1.34e-58	7.27e-56	PAX2	down
AL161945.1	7.25826	-4.15925	0.257868	-16.1294	1.59e-58	8.48e-56	AL161945.1	down
AL161645.1	6.51193	-4.95508	0.307916	-16.0923	2.89e-58	1.52e-55	AL161645.1	down
SLCO4C1	32.1456	-4.86194	0.302701	-16.0618	4.72e-58	2.46e-55	SLCO4C1	down
CLU	28209.2	-2.63338	0.164159	-16.0417	6.54e-58	3.36e-55	CLU	down
HOXB6	47.0836	-4.3485	0.271144	-16.0376	6.98e-58	3.54e-55	HOXB6	down
SEMG2	68425.4	-9.54751	0.595786	-16.0251	8.54e-58	4.28e-55	SEMG2	down
RAB11FIP2	1283.94	-1.30184	0.0820187	-15.8725	9.82e-57	4.86e-54	RAB11FIP2	down
AC074141.1	695.232	2.28626	0.144228	15.8517	1.37e-56	6.69e-54	AC074141.1	up
AMACR	1706.49	3.50443	0.221267	15.838	1.7e-56	8.22e-54	AMACR	up
UGT2B7	32.3595	-5.68789	0.361651	-15.7275	9.79e-56	4.67e-53	UGT2B7	down
AL663070.1	15.3345	-2.68206	0.171975	-15.5956	7.79e-55	3.68e-52	AL663070.1	down
LPL	781.748	-3.75563	0.240992	-15.584	9.35e-55	4.36e-52	LPL	down
UNC5B	1698.92	-2.25297	0.144599	-15.5808	9.83e-55	4.53e-52	UNC5B	down
HOXB9	117.329	-3.797	0.243962	-15.5639	1.28e-54	5.83e-52	HOXB9	down
HS3ST5	18.1312	-5.00334	0.322445	-15.5169	2.67e-54	1.2e-51	HS3ST5	down
GNAO1	651.751	-2.53601	0.164549	-15.4119	1.36e-53	6.06e-51	GNAO1	down
HOXC6	611.757	2.89999	0.188639	15.3732	2.48e-53	1.09e-50	HOXC6	up
PIK3C2G	71.3579	-4.44067	0.289079	-15.3615	2.97e-53	1.29e-50	PIK3C2G	down
SEMG1	143163	-9.82129	0.645502	-15.215	2.81e-52	1.21e-49	SEMG1	down
PLLP	487.621	-1.8402	0.121346	-15.1648	6.04e-52	2.58e-49	PLLP	down
KCNJ15	200.892	-3.32349	0.220011	-15.106	1.48e-51	6.24e-49	KCNJ15	down
SLC46A2	14.4162	-4.12679	0.273413	-15.0936	1.78e-51	7.45e-49	SLC46A2	down
LPCAT2	887.864	-1.8804	0.124729	-15.0758	2.34e-51	9.64e-49	LPCAT2	down
LRFN1	495.391	1.51647	0.100593	15.0753	2.36e-51	9.64e-49	LRFN1	up
ZIC2	215.096	4.40193	0.293489	14.9986	7.5e-51	3.04e-48	ZIC2	up
AL031123.2	105.892	2.10446	0.140388	14.9903	8.5e-51	3.41e-48	AL031123.2	up
QPRT	417.353	-2.46847	0.165234	-14.9393	1.83e-50	7.26e-48	QPRT	down
AC008759.3	17.8003	-3.76894	0.25334	-14.877	4.65e-50	1.83e-47	AC008759.3	down
GPRC5B	1008.7	-1.88736	0.126883	-14.8748	4.8e-50	1.87e-47	GPRC5B	down
TMEM171	7.41808	-3.07046	0.206738	-14.8519	6.76e-50	2.61e-47	TMEM171	down
GLIS3	443.012	-2.1539	0.145949	-14.7579	2.74e-49	1.04e-46	GLIS3	down
G0S2	345.636	-2.33535	0.158465	-14.7373	3.71e-49	1.4e-46	G0S2	down
PRR36	1690.37	1.80219	0.122521	14.7092	5.63e-49	2.11e-46	PRR36	up
SLMAP	5125.15	-1.19273	0.0813675	-14.6585	1.19e-48	4.41e-46	SLMAP	down
PCSEAT	352.614	3.35986	0.22982	14.6196	2.11e-48	7.75e-46	PCSEAT	up
ST6GALNAC4	433.437	-1.8499	0.126553	-14.6176	2.17e-48	7.9e-46	ST6GALNAC4	down
PDK4	6571.83	-3.07232	0.210405	-14.6019	2.73e-48	9.86e-46	PDK4	down
KCNQ1	1503.08	-1.92647	0.131998	-14.5947	3.04e-48	1.09e-45	KCNQ1	down
LINC01085	5.68466	-4.47761	0.306888	-14.5904	3.23e-48	1.15e-45	LINC01085	down
ARHGEF40	1530.17	-1.50676	0.103523	-14.5549	5.43e-48	1.91e-45	ARHGEF40	down
MICALL1	2003.71	-0.982141	0.0675299	-14.5438	6.39e-48	2.23e-45	MICALL1	no
AC103702.2	8.82709	-3.64059	0.250384	-14.54	6.76e-48	2.33e-45	AC103702.2	down
AC084026.2	4.29148	-4.49783	0.309612	-14.5273	8.13e-48	2.79e-45	AC084026.2	down
SLC28A3	40.4672	-4.48046	0.309773	-14.4637	2.05e-47	6.98e-45	SLC28A3	down
AL049767.1	16.0462	-6.78014	0.470642	-14.4061	4.73e-47	1.59e-44	AL049767.1	down
AL929091.1	6.93595	-3.20745	0.222722	-14.4011	5.09e-47	1.7e-44	AL929091.1	down
SP6	290.011	-2.10515	0.146327	-14.3866	6.28e-47	2.08e-44	SP6	down
AL133325.3	23.6627	4.88568	0.339841	14.3764	7.28e-47	2.39e-44	AL133325.3	up
SNHG4	705.928	2.13982	0.149182	14.3437	1.17e-46	3.8e-44	SNHG4	up
CAMK2G	2332.34	-0.99412	0.0693912	-14.3263	1.5e-46	4.85e-44	CAMK2G	no
SIM2	2352.56	2.34947	0.16418	14.3103	1.89e-46	6.05e-44	SIM2	up
FAM167A	238.666	-2.97604	0.208198	-14.2942	2.38e-46	7.56e-44	FAM167A	down
RHOBTB2	859.157	-1.24373	0.0870183	-14.2928	2.43e-46	7.66e-44	RHOBTB2	down
CGREF1	1442	1.93992	0.135907	14.2739	3.18e-46	9.97e-44	CGREF1	up
FOXP4-AS1	80.1098	2.15865	0.151347	14.2629	3.73e-46	1.16e-43	FOXP4-AS1	up
PON3	30.3753	-3.37685	0.237083	-14.2433	4.93e-46	1.52e-43	PON3	down
PJA1	1496.95	-1.01424	0.0712811	-14.2288	6.08e-46	1.86e-43	PJA1	down
SLC2A9-AS1	5.6103	-3.88404	0.273	-14.2272	6.21e-46	1.89e-43	SLC2A9-AS1	down
FCRLB	29.7518	-1.90748	0.134896	-14.1403	2.14e-45	6.46e-43	FCRLB	down
GRAMD1B	142.797	-1.91943	0.135758	-14.1387	2.19e-45	6.56e-43	GRAMD1B	down
HOXB-AS3	18.7546	-5.10811	0.361375	-14.1352	2.3e-45	6.84e-43	HOXB-AS3	down
PRPS2	3085.5	-1.30727	0.0925249	-14.1288	2.52e-45	7.44e-43	PRPS2	down
ONECUT2	472.475	3.2686	0.231552	14.116	3.03e-45	8.86e-43	ONECUT2	up
ZNF185	2393.07	-2.05683	0.146204	-14.0682	5.96e-45	1.73e-42	ZNF185	down
NFYB	2256.06	-0.886718	0.063045	-14.0648	6.25e-45	1.8e-42	NFYB	no
AC005041.1	5.95503	-2.55513	0.181715	-14.0612	6.58e-45	1.88e-42	AC005041.1	down
DRAIC	1662.42	2.22549	0.158274	14.061	6.6e-45	1.88e-42	DRAIC	up
LINC01182	2.65786	-4.70604	0.335262	-14.0369	9.27e-45	2.62e-42	LINC01182	down
SLC19A1	2635.36	1.39658	0.0997923	13.9949	1.67e-44	4.69e-42	SLC19A1	up
ZIC5	95.9405	5.03787	0.359989	13.9945	1.68e-44	4.69e-42	ZIC5	up
CDK18	633.639	-1.79965	0.128903	-13.9613	2.69e-44	7.43e-42	CDK18	down
RASAL1	60.6926	-3.13124	0.225417	-13.8909	7.19e-44	1.97e-41	RASAL1	down
TRIM9	39.0184	-2.28289	0.164352	-13.8902	7.26e-44	1.98e-41	TRIM9	down
SLCO2A1	3623.71	-1.787	0.128671	-13.8882	7.47e-44	2.02e-41	SLCO2A1	down
CTBP1-AS	421.766	2.59483	0.187135	13.8661	1.02e-43	2.73e-41	CTBP1-AS	up
ANXA9	381.937	-1.6382	0.118255	-13.8531	1.22e-43	3.26e-41	ANXA9	down
CCDC27	10.4021	-2.30292	0.167182	-13.775	3.6e-43	9.57e-41	CCDC27	down
LINC01475	11.5568	5.27013	0.383024	13.7593	4.48e-43	1.18e-40	LINC01475	up
VPS9D1-AS1	438.698	1.90854	0.138915	13.7389	5.94e-43	1.56e-40	VPS9D1-AS1	up
TNRC18P1	14.1086	-2.3475	0.171155	-13.7157	8.18e-43	2.13e-40	TNRC18P1	down
ARHGEF26	5098.12	1.58468	0.115607	13.7075	9.15e-43	2.37e-40	ARHGEF26	up
KCNJ16	131.841	-5.36091	0.391164	-13.705	9.47e-43	2.43e-40	KCNJ16	down
HOXB7	142.036	-2.60042	0.189872	-13.6957	1.08e-42	2.75e-40	HOXB7	down
PRDM16-DT	33.3468	-2.76745	0.202682	-13.6541	1.91e-42	4.84e-40	PRDM16-DT	down
CA14	152.309	-2.69077	0.197081	-13.6531	1.93e-42	4.88e-40	CA14	down
AOX1	1474.58	-2.46061	0.180235	-13.6522	1.96e-42	4.91e-40	AOX1	down
SBK1	1310.67	1.38104	0.101656	13.5855	4.88e-42	1.22e-39	SBK1	up
LINC00607	10.1761	-2.45292	0.180708	-13.5739	5.72e-42	1.41e-39	LINC00607	down
POU2F3	115.514	-1.58973	0.117157	-13.5693	6.09e-42	1.5e-39	POU2F3	down
AL513324.1	2.29435	-5.41793	0.399591	-13.5587	7.04e-42	1.72e-39	AL513324.1	down
PALM3	172.94	-2.91924	0.215951	-13.5181	1.22e-41	2.97e-39	PALM3	down
PAX8	208.479	-3.29746	0.243962	-13.5163	1.25e-41	3.03e-39	PAX8	down
PYCR1	6566.03	1.31867	0.0977616	13.4886	1.83e-41	4.38e-39	PYCR1	up
MAT2B	2883.42	-0.728568	0.054023	-13.4863	1.88e-41	4.5e-39	MAT2B	no
MARCKSL1	23458.7	1.34761	0.099959	13.4816	2.01e-41	4.76e-39	MARCKSL1	up
ULK3	3158.56	0.970664	0.0720117	13.4792	2.07e-41	4.89e-39	ULK3	no
NAGS	121.063	-1.55141	0.115272	-13.4586	2.74e-41	6.42e-39	NAGS	down
MED21	1326.85	-0.703275	0.0522826	-13.4514	3.02e-41	7.04e-39	MED21	no
QSOX2	1351.34	0.858767	0.0638951	13.4403	3.51e-41	8.14e-39	QSOX2	no
UCN	83.7257	2.13078	0.158635	13.432	3.93e-41	9.05e-39	UCN	up
AIF1L	1799.99	-1.661	0.123788	-13.4181	4.73e-41	1.08e-38	AIF1L	down
LIPG	292.617	-2.85915	0.213605	-13.3852	7.38e-41	1.68e-38	LIPG	down
APOBEC3C	1579.24	-2.09521	0.156621	-13.3776	8.18e-41	1.85e-38	APOBEC3C	down
CA3-AS1	12.2637	-2.56312	0.191652	-13.3738	8.6e-41	1.94e-38	CA3-AS1	down
PDE7B	279.471	-1.69363	0.126717	-13.3654	9.63e-41	2.16e-38	PDE7B	down
PAQR7	721.518	-1.4846	0.111208	-13.3498	1.19e-40	2.64e-38	PAQR7	down
TGFBR3	2030.34	-1.69796	0.127228	-13.3457	1.25e-40	2.78e-38	TGFBR3	down
LINC01509	105.457	2.16557	0.162308	13.3423	1.31e-40	2.89e-38	LINC01509	up
NPFFR2	12.6085	-4.73389	0.355134	-13.3299	1.55e-40	3.4e-38	NPFFR2	down
MFN2	6493.3	-0.649739	0.0488128	-13.3108	2e-40	4.36e-38	MFN2	no
TES	3848.79	-1.19362	0.0897954	-13.2927	2.55e-40	5.53e-38	TES	down
ADTRP	134.063	-3.18061	0.239476	-13.2815	2.96e-40	6.38e-38	ADTRP	down
YPEL1	279.331	1.28214	0.0966854	13.2609	3.9e-40	8.37e-38	YPEL1	up
LMX1B	116.944	2.85293	0.215152	13.2601	3.95e-40	8.41e-38	LMX1B	up
AC084879.1	3.95979	-3.22783	0.24353	-13.2544	4.26e-40	9.03e-38	AC084879.1	down
AL353637.2	306.685	4.97566	0.376272	13.2236	6.41e-40	1.35e-37	AL353637.2	up
EFNB1	1182.78	-1.3277	0.100408	-13.223	6.47e-40	1.36e-37	EFNB1	down
LINC01819	19.543	-2.8184	0.213248	-13.2165	7.04e-40	1.47e-37	LINC01819	down
ARHGEF38	1932.49	1.51079	0.114326	13.2148	7.21e-40	1.5e-37	ARHGEF38	up
PGRMC1	6814.71	-0.905335	0.068689	-13.1802	1.14e-39	2.36e-37	PGRMC1	no
KRT24	10.8542	-5.10753	0.387922	-13.1664	1.37e-39	2.82e-37	KRT24	down
B3GAT1-DT	883.653	2.93973	0.223454	13.1558	1.58e-39	3.22e-37	B3GAT1-DT	up
GNAZ	518.549	-1.84132	0.139971	-13.155	1.59e-39	3.24e-37	GNAZ	down
LINC02086	13.2912	-2.0491	0.15582	-13.1504	1.69e-39	3.43e-37	LINC02086	down
PHGR1	176.398	3.79792	0.288998	13.1417	1.9e-39	3.83e-37	PHGR1	up
PTGS2	3583.81	-3.073	0.233975	-13.1339	2.11e-39	4.22e-37	PTGS2	down
LINC02532	11.5082	-3.6493	0.278049	-13.1247	2.38e-39	4.74e-37	LINC02532	down
SNPH	670.957	-1.85372	0.141417	-13.1082	2.96e-39	5.87e-37	SNPH	down
C2orf88	278.238	-2.41238	0.184165	-13.099	3.34e-39	6.59e-37	C2orf88	down
APOBEC3G	443.91	-1.96938	0.150413	-13.0932	3.6e-39	7.08e-37	APOBEC3G	down
C11orf45	94.4435	-1.93994	0.148461	-13.067	5.08e-39	9.94e-37	C11orf45	down
TRIM36	2667.09	1.45995	0.1118	13.0585	5.68e-39	1.11e-36	TRIM36	up
AC009119.1	349.199	2.67415	0.2048	13.0574	5.77e-39	1.12e-36	AC009119.1	up
AC106865.1	7.6439	-3.18531	0.244192	-13.0443	6.85e-39	1.32e-36	AC106865.1	down
EZH2	370.006	1.42219	0.109106	13.0349	7.74e-39	1.49e-36	EZH2	up
SLIT1	930.19	2.93324	0.225245	13.0224	9.12e-39	1.74e-36	SLIT1	up
AC129507.4	5.15223	-2.96559	0.227815	-13.0175	9.73e-39	1.85e-36	AC129507.4	down
PTGS1	1141.23	-2.56747	0.197469	-13.0019	1.19e-38	2.26e-36	PTGS1	down
CFAP65	189.655	2.12596	0.163769	12.9815	1.56e-38	2.93e-36	CFAP65	up
SLC25A12	1350.53	-0.74941	0.0577849	-12.969	1.84e-38	3.44e-36	SLC25A12	no
ARLNC1	118.247	4.18271	0.32258	12.9664	1.9e-38	3.54e-36	ARLNC1	up
RBBP7	6457.82	-0.741698	0.0572569	-12.9539	2.23e-38	4.15e-36	RBBP7	no
TRPM4	27806.2	1.67913	0.129676	12.9487	2.39e-38	4.42e-36	TRPM4	up
SH3GLB1	4276.6	-0.594704	0.0459532	-12.9415	2.62e-38	4.83e-36	SH3GLB1	no
CFL2	3030.04	-1.50038	0.115997	-12.9346	2.87e-38	5.25e-36	CFL2	down
RAB9B	275.376	-1.91144	0.147818	-12.931	3.01e-38	5.48e-36	RAB9B	down
AFAP1L2	1122.4	-1.67117	0.129249	-12.9298	3.06e-38	5.54e-36	AFAP1L2	down
TMLHE	139.07	-1.76225	0.1363	-12.9292	3.08e-38	5.56e-36	TMLHE	down
SLPI	3235.76	-3.62565	0.280735	-12.9149	3.71e-38	6.67e-36	SLPI	down
SCARA3	1958.27	-1.79609	0.139348	-12.8892	5.18e-38	9.26e-36	SCARA3	down
FNDC10	461.455	2.12608	0.165035	12.8826	5.64e-38	1.01e-35	FNDC10	up
AL031985.3	159.03	1.1071	0.0860331	12.8684	6.78e-38	1.2e-35	AL031985.3	up
ME1	559.635	-1.85621	0.144299	-12.8637	7.21e-38	1.27e-35	ME1	down
C22orf23	112.515	-1.34788	0.104816	-12.8595	7.61e-38	1.34e-35	C22orf23	down
CPLX1	364.77	1.48432	0.115577	12.8428	9.44e-38	1.65e-35	CPLX1	up
AC012531.1	23.5305	3.79761	0.295745	12.8409	9.68e-38	1.69e-35	AC012531.1	up
CDIN1	333.266	-1.3734	0.107033	-12.8315	1.09e-37	1.89e-35	CDIN1	down
UNC93B7	2.02611	-4.90675	0.382414	-12.831	1.1e-37	1.9e-35	UNC93B7	down
AL359314.1	83.4348	4.06714	0.317265	12.8194	1.28e-37	2.2e-35	AL359314.1	up
SLC26A6	1400.95	1.29368	0.101044	12.8032	1.57e-37	2.7e-35	SLC26A6	up
ANKMY2	846.189	-0.69571	0.0543489	-12.8008	1.62e-37	2.77e-35	ANKMY2	no
TRIM61	23.759	-1.88921	0.147609	-12.7987	1.67e-37	2.83e-35	TRIM61	down
RHOXF1P1	34.8575	4.11544	0.323857	12.7076	5.37e-37	9.08e-35	RHOXF1P1	up
SLC9A1	2957.28	-0.950275	0.0748753	-12.6914	6.6e-37	1.11e-34	SLC9A1	no
LINC01671	25.1242	-3.19247	0.252088	-12.6641	9.35e-37	1.57e-34	LINC01671	down
NYNRIN	978.716	-1.9547	0.154507	-12.6512	1.1e-36	1.84e-34	NYNRIN	down
SBSPON	564.111	-2.34251	0.185235	-12.6462	1.17e-36	1.95e-34	SBSPON	down
ARC	126.356	-2.84273	0.22488	-12.6411	1.25e-36	2.07e-34	ARC	down
GSTP1	6290.08	-2.10934	0.166868	-12.6408	1.26e-36	2.08e-34	GSTP1	down
PCAT1	380.98	2.14444	0.16981	12.6285	1.47e-36	2.42e-34	PCAT1	up
AL353622.1	185.78	2.04657	0.162151	12.6214	1.61e-36	2.63e-34	AL353622.1	up
AC069228.1	175.12	5.63603	0.446812	12.6139	1.77e-36	2.89e-34	AC069228.1	up
SEC23A	2127.78	-1.14774	0.091072	-12.6026	2.04e-36	3.32e-34	SEC23A	down
SNAP25-AS1	7.86294	-2.48255	0.197193	-12.5894	2.41e-36	3.9e-34	SNAP25-AS1	down
AC139783.1	25.0459	4.23568	0.336534	12.5862	2.52e-36	4.03e-34	AC139783.1	up
SLC26A3	1003.5	-4.78136	0.379888	-12.5862	2.51e-36	4.03e-34	SLC26A3	down
ATP1A4	26.4218	-2.72451	0.216532	-12.5825	2.64e-36	4.19e-34	ATP1A4	down
TSPAN18	1125.13	-1.80797	0.14369	-12.5825	2.64e-36	4.19e-34	TSPAN18	down
POU3F3	166.341	-7.94651	0.631765	-12.5783	2.78e-36	4.41e-34	POU3F3	down
TPM1	23050.9	-1.51435	0.120504	-12.5668	3.21e-36	5.07e-34	TPM1	down
NETO2	547.495	2.02869	0.161554	12.5574	3.62e-36	5.69e-34	NETO2	up
RAP1A	3753.06	-0.716736	0.0571181	-12.5483	4.06e-36	6.36e-34	RAP1A	no
LINC01159	8.16469	-6.41541	0.511963	-12.531	5.05e-36	7.88e-34	LINC01159	down
SMPDL3B	827.934	1.63324	0.130381	12.5267	5.33e-36	8.29e-34	SMPDL3B	up
AC092078.3	9.53969	-3.83286	0.306043	-12.5239	5.52e-36	8.55e-34	AC092078.3	down
PARVA	7555.55	-0.915113	0.0730943	-12.5196	5.83e-36	8.97e-34	PARVA	no
PLEKHA2	1020.69	-1.31387	0.104946	-12.5195	5.84e-36	8.97e-34	PLEKHA2	down
AC104237.3	2.84065	-3.00115	0.239804	-12.515	6.18e-36	9.45e-34	AC104237.3	down
HOXD3	60.999	-2.27758	0.182049	-12.5108	6.52e-36	9.93e-34	HOXD3	down
PDIA2	173.918	3.99577	0.319678	12.4994	7.52e-36	1.14e-33	PDIA2	up
ELP3	1720.63	-0.873699	0.069932	-12.4935	8.1e-36	1.22e-33	ELP3	no
DCUN1D4	1405.57	-0.614495	0.0491928	-12.4916	8.3e-36	1.25e-33	DCUN1D4	no
H2AW	1879.41	1.70036	0.136146	12.4893	8.54e-36	1.28e-33	H2AW	up
SNHG3	1470.74	1.55914	0.12494	12.4791	9.71e-36	1.45e-33	SNHG3	up
PRDM11	703.035	-1.00857	0.0808971	-12.4673	1.13e-35	1.68e-33	PRDM11	down
ENTR1	1879.68	0.807163	0.0647753	12.461	1.22e-35	1.81e-33	ENTR1	no
C12orf75	1422.77	-1.60647	0.129002	-12.453	1.35e-35	1.99e-33	C12orf75	down
LMO3	497.691	-2.23653	0.179787	-12.4399	1.59e-35	2.34e-33	LMO3	down
BNIP2	2202.53	-0.721961	0.0580494	-12.437	1.65e-35	2.42e-33	BNIP2	no
LARGE1	1482.06	-1.23052	0.0989796	-12.4321	1.75e-35	2.56e-33	LARGE1	down
SRRM2-AS1	220.808	1.31224	0.105572	12.4298	1.8e-35	2.62e-33	SRRM2-AS1	up
GNL3	7282.15	0.82681	0.0665594	12.4221	1.98e-35	2.88e-33	GNL3	no
AC104667.2	197.37	2.02411	0.163029	12.4157	2.15e-35	3.11e-33	AC104667.2	up
STAT5B	4084.34	-0.615827	0.0496777	-12.3965	2.73e-35	3.94e-33	STAT5B	no
HMGN4	2944.74	-0.595108	0.0480079	-12.396	2.75e-35	3.94e-33	HMGN4	no
ZSCAN2	420.165	0.842017	0.0679469	12.3923	2.88e-35	4.12e-33	ZSCAN2	no
ANGPT1	780.466	-2.11438	0.170772	-12.3813	3.3e-35	4.71e-33	ANGPT1	down
CAV1	4128.94	-1.77249	0.143182	-12.3793	3.38e-35	4.81e-33	CAV1	down
DNAH5	2333.87	2.25283	0.182026	12.3764	3.51e-35	4.97e-33	DNAH5	up
GPC5-AS1	146.378	5.19251	0.419634	12.3739	3.62e-35	5.11e-33	GPC5-AS1	up
SCPEP1	4056.81	-1.00568	0.0812775	-12.3734	3.64e-35	5.12e-33	SCPEP1	down
DUSP2	987.104	-2.42469	0.196286	-12.3528	4.7e-35	6.59e-33	DUSP2	down
COLCA2	122.535	-1.26513	0.102499	-12.3429	5.32e-35	7.44e-33	COLCA2	down
TMEM120B	925.382	0.876255	0.0710185	12.3384	5.63e-35	7.83e-33	TMEM120B	no
PCA3	19286.7	3.47022	0.281589	12.3237	6.75e-35	9.37e-33	PCA3	up
UGT2B4	357.552	4.3764	0.355243	12.3195	7.12e-35	9.84e-33	UGT2B4	up
C8orf88	61.502	-2.00296	0.162591	-12.319	7.16e-35	9.86e-33	C8orf88	down
LYVE1	149.741	-2.33213	0.189463	-12.3092	8.08e-35	1.11e-32	LYVE1	down
AP006748.1	46.9604	3.76283	0.305819	12.3041	8.61e-35	1.18e-32	AP006748.1	up
ADCY8	7.525	-4.84071	0.393777	-12.293	9.88e-35	1.35e-32	ADCY8	down
NUP210	4159.16	1.18926	0.0967506	12.292	1e-34	1.36e-32	NUP210	up
AC000093.1	22.1838	2.74994	0.22391	12.2814	1.14e-34	1.54e-32	AC000093.1	up
C20orf194	1135.04	-1.19642	0.0974311	-12.2797	1.16e-34	1.57e-32	C20orf194	down
CST2	417.526	3.83647	0.31243	12.2795	1.17e-34	1.57e-32	CST2	up
TFE3	2890.88	-0.59278	0.0483349	-12.264	1.41e-34	1.89e-32	TFE3	no
ESRP2	4072.77	1.09327	0.0892092	12.2551	1.58e-34	2.11e-32	ESRP2	up
LRRC56	568.745	1.19367	0.0975072	12.2418	1.86e-34	2.47e-32	LRRC56	up
ANO6	2870.14	-1.4253	0.116508	-12.2335	2.06e-34	2.73e-32	ANO6	down
NKAPL	29.3429	-1.89797	0.155154	-12.2328	2.08e-34	2.75e-32	NKAPL	down
FERMT2	3105.65	-1.37891	0.112733	-12.2317	2.11e-34	2.78e-32	FERMT2	down
CAMKK2	18975.3	1.61519	0.132114	12.2257	2.27e-34	2.98e-32	CAMKK2	up
RMDN2	278.196	-0.743707	0.0608366	-12.2247	2.3e-34	3.01e-32	RMDN2	no
DUSP19	171.821	-1.14407	0.0936082	-12.2219	2.37e-34	3.1e-32	DUSP19	down
MMP26	124.476	3.02443	0.247617	12.2141	2.61e-34	3.4e-32	MMP26	up
CALM1	14605.6	-0.85138	0.0697221	-12.211	2.71e-34	3.52e-32	CALM1	no
DUSP3	5235.22	-0.817893	0.0670064	-12.2062	2.88e-34	3.72e-32	DUSP3	no
RBBP8	860.346	-0.877476	0.0718972	-12.2046	2.94e-34	3.79e-32	RBBP8	no
DLX2	171.203	3.20148	0.262521	12.1951	3.3e-34	4.24e-32	DLX2	up
SPINT3	3.13546	-5.49921	0.450983	-12.1938	3.35e-34	4.29e-32	SPINT3	down
OR51L1	17.2591	3.77996	0.310043	12.1917	3.44e-34	4.39e-32	OR51L1	up
VWA5B2	107.561	-2.42329	0.198827	-12.188	3.6e-34	4.58e-32	VWA5B2	down
CBX8	599.753	1.05557	0.0866129	12.1872	3.64e-34	4.61e-32	CBX8	up
ZFHX4-AS1	9.89252	-2.89836	0.238232	-12.1661	4.71e-34	5.96e-32	ZFHX4-AS1	down
RHEX	51.6976	-2.28563	0.187883	-12.1652	4.77e-34	6.01e-32	RHEX	down
PLBD1	322.573	-1.49027	0.12255	-12.1605	5.05e-34	6.34e-32	PLBD1	down
ERVH48-1	555.98	3.76352	0.309569	12.1573	5.25e-34	6.57e-32	ERVH48-1	up
SNHG25	59.3166	2.50107	0.206094	12.1356	6.84e-34	8.54e-32	SNHG25	up
C2orf72	3527.52	2.28879	0.188645	12.1328	7.08e-34	8.82e-32	C2orf72	up
ALDH1L2	250.168	-1.92953	0.159068	-12.1302	7.31e-34	9.07e-32	ALDH1L2	down
MATK	531.81	2.52102	0.20796	12.1226	8.02e-34	9.92e-32	MATK	up
AL161668.4	2.68945	-2.69439	0.222429	-12.1135	8.96e-34	1.1e-31	AL161668.4	down
AC011523.1	44.9179	2.73402	0.225723	12.1123	9.09e-34	1.12e-31	AC011523.1	up
FEZF1-AS1	25.4147	3.75612	0.31011	12.1122	9.1e-34	1.12e-31	FEZF1-AS1	up
GOLM1	69805.4	1.72629	0.142575	12.1079	9.59e-34	1.17e-31	GOLM1	up
AL358334.2	2.97959	-2.92743	0.241787	-12.1075	9.64e-34	1.17e-31	AL358334.2	down
SCN11A	16.2754	-2.07303	0.171266	-12.1042	1e-33	1.22e-31	SCN11A	down
WDR1	13769.6	-0.606126	0.0500859	-12.1017	1.03e-33	1.25e-31	WDR1	no
RCBTB2	967.28	-0.927226	0.0766279	-12.1004	1.05e-33	1.27e-31	RCBTB2	no
BOLA3-AS1	116.952	-1.29529	0.107106	-12.0935	1.14e-33	1.38e-31	BOLA3-AS1	down
FDX1	1421.87	-0.989349	0.081854	-12.0867	1.24e-33	1.49e-31	FDX1	no
IRF5	441.327	-1.4239	0.117818	-12.0856	1.26e-33	1.51e-31	IRF5	down
FEM1B	3736.94	-0.636579	0.0526791	-12.0841	1.28e-33	1.52e-31	FEM1B	no
LINC00665	2247.5	1.0581	0.0875601	12.0843	1.28e-33	1.52e-31	LINC00665	up
AP000697.1	25.6927	3.59293	0.297337	12.0837	1.29e-33	1.53e-31	AP000697.1	up
COL2A1	3606.95	4.98036	0.41271	12.0675	1.57e-33	1.85e-31	COL2A1	up
PLAAT5	55.5789	-2.2463	0.186215	-12.0629	1.66e-33	1.95e-31	PLAAT5	down
NDRG2	5777.07	-1.352	0.112084	-12.0624	1.67e-33	1.96e-31	NDRG2	down
DCAF12L1	10.4676	-3.12683	0.259264	-12.0604	1.71e-33	2e-31	DCAF12L1	down
NEURL1B	1485.26	-1.3019	0.10795	-12.0602	1.71e-33	2e-31	NEURL1B	down
RAB17	2083.27	1.34166	0.111343	12.0498	1.94e-33	2.27e-31	RAB17	up
SGCB	1883.44	-1.1365	0.0943786	-12.042	2.14e-33	2.48e-31	SGCB	down
TMEM132A	2711.77	1.64918	0.136964	12.041	2.16e-33	2.5e-31	TMEM132A	up
FGFRL1	4539.89	1.60148	0.133148	12.0278	2.54e-33	2.93e-31	FGFRL1	up
AL354743.2	6.43824	-3.56953	0.29687	-12.0239	2.66e-33	3.07e-31	AL354743.2	down
PLBD1-AS1	87.3481	-2.01974	0.16813	-12.013	3.04e-33	3.49e-31	PLBD1-AS1	down
AC006042.1	132.256	1.49957	0.124856	12.0104	3.13e-33	3.59e-31	AC006042.1	up
TMED11P	44.4729	4.06762	0.338804	12.0058	3.31e-33	3.78e-31	TMED11P	up
AL691432.4	32.5613	2.20156	0.183636	11.9887	4.07e-33	4.64e-31	AL691432.4	up
FRMD6	2007.59	-1.55776	0.129986	-11.984	4.31e-33	4.89e-31	FRMD6	down
GATA3-AS1	17.1942	-3.3403	0.278876	-11.9777	4.65e-33	5.27e-31	GATA3-AS1	down
ARHGEF38-IT1	54.8066	2.28634	0.190895	11.9769	4.69e-33	5.3e-31	ARHGEF38-IT1	up
OR51H2P	36.6589	3.20356	0.267702	11.9669	5.3e-33	5.97e-31	OR51H2P	up
C2CD4C	123.655	2.31362	0.193342	11.9664	5.33e-33	5.98e-31	C2CD4C	up
CXCR2	42.37	-2.67423	0.223555	-11.9623	5.6e-33	6.27e-31	CXCR2	down
PIP5K1B	188.262	-1.80708	0.151224	-11.9497	6.52e-33	7.28e-31	PIP5K1B	down
PATE1	1105.78	-8.58852	0.718908	-11.9466	6.76e-33	7.53e-31	PATE1	down
AC092535.5	814.509	3.12637	0.261837	11.9401	7.31e-33	8.12e-31	AC092535.5	up
APOC1	441.822	2.37781	0.199204	11.9366	7.63e-33	8.45e-31	APOC1	up
HSPA6	463.428	-3.59557	0.301411	-11.9291	8.34e-33	9.21e-31	HSPA6	down
PRNP	6630.3	-0.922084	0.0773697	-11.9179	9.55e-33	1.05e-30	PRNP	no
EIF4EBP2	6378.54	-0.669581	0.0562038	-11.9134	1.01e-32	1.11e-30	EIF4EBP2	no
CRYZ	1633.07	-1.01942	0.0855919	-11.9102	1.05e-32	1.15e-30	CRYZ	down
C20orf202	6.18391	-2.03183	0.170673	-11.9048	1.12e-32	1.22e-30	C20orf202	down
CASKIN1	187.037	1.734	0.145658	11.9045	1.12e-32	1.22e-30	CASKIN1	up
AL031123.3	32.757	1.85359	0.155766	11.8998	1.19e-32	1.29e-30	AL031123.3	up
AC141930.2	48.9192	3.02058	0.253887	11.8973	1.22e-32	1.32e-30	AC141930.2	up
PAQR6	641.498	2.26836	0.190714	11.894	1.27e-32	1.37e-30	PAQR6	up
KLHL4	25.5676	-2.12133	0.178401	-11.8908	1.32e-32	1.42e-30	KLHL4	down
HOXB5	40.9561	-3.54561	0.298328	-11.8849	1.42e-32	1.52e-30	HOXB5	down
PODXL2	6740.59	1.41534	0.119151	11.8786	1.53e-32	1.64e-30	PODXL2	up
RNF180	628.44	-1.09862	0.0925147	-11.875	1.6e-32	1.71e-30	RNF180	down
MYLK	31942.9	-2.08026	0.175427	-11.8583	1.95e-32	2.08e-30	MYLK	down
FRMPD3	425.087	1.75688	0.148174	11.8569	1.98e-32	2.11e-30	FRMPD3	up
VAMP3	4157.65	-0.497741	0.0419882	-11.8543	2.04e-32	2.17e-30	VAMP3	no
ATP8A2	775.343	3.49617	0.294995	11.8516	2.11e-32	2.23e-30	ATP8A2	up
AL451069.2	5.51982	-3.23509	0.273169	-11.8428	2.34e-32	2.47e-30	AL451069.2	down
EPM2A	442.225	-0.941129	0.0794905	-11.8395	2.44e-32	2.57e-30	EPM2A	no
DUOX1	880.93	-2.19581	0.185477	-11.8387	2.46e-32	2.58e-30	DUOX1	down
DEFB132	210.26	-2.38651	0.201704	-11.8317	2.68e-32	2.8e-30	DEFB132	down
PRR7	191.246	1.84673	0.156084	11.8317	2.68e-32	2.8e-30	PRR7	up
CERS1	116.44	2.55848	0.216318	11.8274	2.82e-32	2.93e-30	CERS1	up
PPP1R12A	4309.42	-0.915456	0.0774674	-11.8173	3.18e-32	3.3e-30	PPP1R12A	no
AC116345.1	6.90329	-4.1555	0.351791	-11.8124	3.37e-32	3.49e-30	AC116345.1	down
NEK5	487.524	1.79417	0.15222	11.7867	4.57e-32	4.73e-30	NEK5	up
AC108718.1	2.47695	-2.38878	0.202685	-11.7857	4.62e-32	4.77e-30	AC108718.1	down
FAM13B	2028.42	-0.830473	0.0704744	-11.784	4.72e-32	4.85e-30	FAM13B	no
TRIM31	51.3606	-2.57624	0.21884	-11.7723	5.43e-32	5.56e-30	TRIM31	down
IL18R1	142.612	-1.70523	0.144962	-11.7633	6.03e-32	6.17e-30	IL18R1	down
TMEM184A	2956.91	1.21128	0.103046	11.7547	6.68e-32	6.81e-30	TMEM184A	up
C9orf163	39.1234	1.9119	0.162774	11.7458	7.42e-32	7.55e-30	C9orf163	up
B4GALNT4	1279.03	1.93181	0.164722	11.7277	9.19e-32	9.33e-30	B4GALNT4	up
SAMD12	510.678	-1.7945	0.153023	-11.727	9.27e-32	9.38e-30	SAMD12	down
PLP2	1224.61	-1.28599	0.109696	-11.7232	9.69e-32	9.79e-30	PLP2	down
ITSN1	1813.18	-0.883053	0.0753341	-11.7218	9.85e-32	9.92e-30	ITSN1	no
AP001610.3	69.9379	3.19815	0.272912	11.7186	1.02e-31	1.03e-29	AP001610.3	up
PAQR5	46.3434	-1.87469	0.160015	-11.7157	1.06e-31	1.06e-29	PAQR5	down
CYP4F8	3344.55	-4.31318	0.368435	-11.7068	1.18e-31	1.18e-29	CYP4F8	down
SPOP	5142.82	-0.54272	0.0463625	-11.706	1.19e-31	1.18e-29	SPOP	no
TRGJP	13.7562	2.72441	0.232824	11.7016	1.25e-31	1.24e-29	TRGJP	up
AC004982.1	183.528	1.95908	0.167554	11.6922	1.4e-31	1.39e-29	AC004982.1	up
AC010980.1	5.76415	-3.04572	0.260727	-11.6816	1.58e-31	1.56e-29	AC010980.1	down
FOXD1	90.5944	3.34429	0.286285	11.6817	1.58e-31	1.56e-29	FOXD1	up
CCDC78	251.317	2.58909	0.221661	11.6804	1.61e-31	1.58e-29	CCDC78	up
AC010896.1	49.9996	-1.32109	0.113139	-11.6767	1.68e-31	1.65e-29	AC010896.1	down
SLC25A22	2463.03	1.02445	0.08774	11.6759	1.69e-31	1.66e-29	SLC25A22	up
MYBL2	379.047	2.33711	0.200186	11.6747	1.72e-31	1.68e-29	MYBL2	up
GATM	518.802	-1.4634	0.125354	-11.6741	1.73e-31	1.69e-29	GATM	down
AC004982.2	342.358	1.88848	0.161802	11.6715	1.78e-31	1.73e-29	AC004982.2	up
MRPS30-DT	74.2988	-1.26398	0.10835	-11.6656	1.91e-31	1.85e-29	MRPS30-DT	down
NLRP12	113.085	2.43048	0.208383	11.6635	1.96e-31	1.9e-29	NLRP12	up
SAMD10	891.67	0.9786	0.083921	11.661	2.02e-31	1.95e-29	SAMD10	no
AMOT	1826.21	-1.69263	0.145159	-11.6605	2.03e-31	1.95e-29	AMOT	down
HOXC4	306.445	2.26055	0.193966	11.6543	2.18e-31	2.1e-29	HOXC4	up
PCSK6	879.407	1.57543	0.135229	11.6501	2.29e-31	2.2e-29	PCSK6	up
IQANK1	2329.57	1.3459	0.115653	11.6374	2.66e-31	2.54e-29	IQANK1	up
PALLD	12008.2	-1.51994	0.130663	-11.6325	2.82e-31	2.69e-29	PALLD	down
KATNAL1	523.632	-1.12495	0.0967122	-11.632	2.83e-31	2.7e-29	KATNAL1	down
CAV2	1213.56	-1.4498	0.124726	-11.6238	3.12e-31	2.96e-29	CAV2	down
AL031587.5	41.3809	-1.15019	0.0989559	-11.6232	3.14e-31	2.98e-29	AL031587.5	down
TRPM3	45.5649	-2.35903	0.203053	-11.6178	3.35e-31	3.16e-29	TRPM3	down
CALD1	32831.8	-1.33357	0.114849	-11.6115	3.6e-31	3.4e-29	CALD1	down
TMEM132C	146.887	-2.5476	0.21959	-11.6016	4.04e-31	3.81e-29	TMEM132C	down
PABPC1P4	91.3399	-1.47835	0.127514	-11.5936	4.44e-31	4.17e-29	PABPC1P4	down
PAX1	74.7233	4.57031	0.394306	11.5907	4.59e-31	4.3e-29	PAX1	up
STK26	1138.75	-1.2416	0.107246	-11.5772	5.38e-31	5.03e-29	STK26	down
PANTR1	8.34883	-6.34416	0.54824	-11.5719	5.72e-31	5.33e-29	PANTR1	down
PCDH7	1253.71	-1.90893	0.16499	-11.57	5.85e-31	5.44e-29	PCDH7	down
DBNDD1	1796.99	1.34665	0.116466	11.5625	6.38e-31	5.92e-29	DBNDD1	up
RNF126P1	5.15284	-2.00676	0.173624	-11.558	6.72e-31	6.22e-29	RNF126P1	down
ARL4D	404.864	-1.84863	0.159979	-11.5555	6.93e-31	6.4e-29	ARL4D	down
TCEAL1	1490.9	-0.653662	0.0565782	-11.5533	7.11e-31	6.55e-29	TCEAL1	no
TRGC1	21392.4	1.92533	0.166873	11.5377	8.51e-31	7.83e-29	TRGC1	up
CDC42EP4	3756.7	-0.919225	0.0797561	-11.5255	9.82e-31	9.01e-29	CDC42EP4	no
TFAP2B	7.00311	-4.02161	0.349187	-11.5171	1.08e-30	9.91e-29	TFAP2B	down
SVIL	7067.08	-1.41789	0.123147	-11.5137	1.13e-30	1.03e-28	SVIL	down
AC040168.1	20.2176	-1.77186	0.153957	-11.5089	1.19e-30	1.08e-28	AC040168.1	down
GSC	89.7814	1.76434	0.153414	11.5005	1.31e-30	1.19e-28	GSC	up
TBL1X	3975.11	-0.799804	0.0695557	-11.4988	1.34e-30	1.21e-28	TBL1X	no
HCAR2	113.892	-2.06829	0.179943	-11.4941	1.41e-30	1.28e-28	HCAR2	down
RHBDL3	83.2404	-1.82878	0.159466	-11.4681	1.91e-30	1.72e-28	RHBDL3	down
SPTBN2	12172.6	1.01023	0.0881395	11.4617	2.05e-30	1.85e-28	SPTBN2	up
PROSER2-AS1	26.0245	-1.85608	0.161999	-11.4574	2.16e-30	1.94e-28	PROSER2-AS1	down
SH2D1B	9.03555	-2.14259	0.187211	-11.4448	2.5e-30	2.24e-28	SH2D1B	down
ZNF90	44.9542	-1.91315	0.167177	-11.4439	2.52e-30	2.26e-28	ZNF90	down
SULT2A1	16.9995	-6.74046	0.589041	-11.4431	2.55e-30	2.27e-28	SULT2A1	down
FAM222A-AS1	35.3455	2.03607	0.178022	11.4372	2.73e-30	2.43e-28	FAM222A-AS1	up
ANP32E	1156.87	-1.17285	0.102568	-11.4348	2.8e-30	2.49e-28	ANP32E	down
SNORD88A	13.8464	2.37796	0.208005	11.4322	2.89e-30	2.56e-28	SNORD88A	up
ACSM1	5007.37	2.81458	0.246572	11.4148	3.53e-30	3.12e-28	ACSM1	up
SNHG20	379.979	0.964505	0.0845211	11.4114	3.67e-30	3.24e-28	SNHG20	no
AL109976.1	55.7723	-1.96125	0.171874	-11.411	3.68e-30	3.25e-28	AL109976.1	down
AC010326.4	76.8634	1.03462	0.090704	11.4065	3.88e-30	3.4e-28	AC010326.4	up
ETNK2	335.528	-1.27613	0.111877	-11.4066	3.88e-30	3.4e-28	ETNK2	down
TOR1AIP1	3895.47	-0.739267	0.0648145	-11.4059	3.91e-30	3.42e-28	TOR1AIP1	no
CYP2E1	137.485	-1.99704	0.17513	-11.4031	4.03e-30	3.52e-28	CYP2E1	down
RAB19	259.611	1.20932	0.106059	11.4023	4.07e-30	3.55e-28	RAB19	up
FBXO30	833.873	-0.940955	0.0825623	-11.3969	4.33e-30	3.77e-28	FBXO30	no
LINC01778	18.438	-1.79741	0.157839	-11.3876	4.82e-30	4.18e-28	LINC01778	down
U73166.1	122.487	1.73846	0.152812	11.3765	5.48e-30	4.74e-28	U73166.1	up
GATA3	715.131	-2.26329	0.198959	-11.3757	5.53e-30	4.78e-28	GATA3	down
TMEM238	513.6	1.75777	0.154528	11.3751	5.56e-30	4.8e-28	TMEM238	up
LINC02139	5.08367	-2.4807	0.218171	-11.3704	5.87e-30	5.05e-28	LINC02139	down
KCNG3	206.019	3.01591	0.265284	11.3686	5.99e-30	5.14e-28	KCNG3	up
PLEKHA3P1	4.91902	-2.06154	0.181388	-11.3654	6.22e-30	5.33e-28	PLEKHA3P1	down
NACC2	2480.15	-0.968602	0.0852269	-11.365	6.25e-30	5.34e-28	NACC2	no
SHISA8	43.277	2.97297	0.261618	11.3638	6.34e-30	5.4e-28	SHISA8	up
CORO1C	3469.09	-1.0121	0.0891093	-11.3579	6.77e-30	5.76e-28	CORO1C	down
ASPA	145.377	-2.14919	0.189242	-11.3569	6.86e-30	5.82e-28	ASPA	down
GAS6-DT	64.2242	-1.40172	0.123476	-11.3522	7.24e-30	6.13e-28	GAS6-DT	down
VAV2	3176.61	0.755904	0.0666298	11.3448	7.87e-30	6.65e-28	VAV2	no
DOK4	887.483	-1.1573	0.102027	-11.3431	8.03e-30	6.77e-28	DOK4	down
DAB2IP	3175.09	-0.957789	0.0844922	-11.3358	8.72e-30	7.34e-28	DAB2IP	no
AP000438.1	60.51	1.97099	0.173901	11.334	8.9e-30	7.48e-28	AP000438.1	up
TMX4	5716.74	-0.713756	0.0630505	-11.3204	1.04e-29	8.72e-28	TMX4	no
ANKRD66	22.6073	2.80016	0.247445	11.3163	1.09e-29	9.12e-28	ANKRD66	up
AC005180.1	151.964	-2.14126	0.189272	-11.3131	1.13e-29	9.42e-28	AC005180.1	down
PCGF3	2642.49	0.64199	0.0567473	11.3131	1.13e-29	9.42e-28	PCGF3	no
CENPO	278.161	0.863692	0.0763471	11.3127	1.14e-29	9.44e-28	CENPO	no
VCL	10066	-1.44178	0.127518	-11.3064	1.22e-29	1.01e-27	VCL	down
SLC25A45	811.134	1.12008	0.0991039	11.3021	1.28e-29	1.06e-27	SLC25A45	up
LINC00992	198.777	1.8477	0.163545	11.2978	1.35e-29	1.11e-27	LINC00992	up
RBMS3	814.225	-1.28706	0.113952	-11.2947	1.39e-29	1.15e-27	RBMS3	down
PLCD1	968.851	-0.761231	0.0674257	-11.2899	1.47e-29	1.21e-27	PLCD1	no
FAM110C	453.239	-2.23653	0.198109	-11.2894	1.48e-29	1.22e-27	FAM110C	down
UNQ6494	54.3754	1.98	0.175491	11.2826	1.6e-29	1.31e-27	UNQ6494	up
UNC5A	765.163	3.68039	0.326518	11.2716	1.81e-29	1.48e-27	UNC5A	up
SEPTIN10	2399.57	-0.770195	0.0684888	-11.2456	2.44e-29	1.99e-27	SEPTIN10	no
RPS10	76.819	1.65935	0.147573	11.2443	2.47e-29	2.01e-27	RPS10	up
PSIP1	2370.47	-0.73307	0.0651962	-11.244	2.48e-29	2.01e-27	PSIP1	no
GAL	176.874	2.35355	0.209332	11.2431	2.5e-29	2.03e-27	GAL	up
KPNA3	1454.32	-0.845367	0.0752079	-11.2404	2.58e-29	2.09e-27	KPNA3	no
TMEM37	169.098	-1.70666	0.151848	-11.2393	2.61e-29	2.11e-27	TMEM37	down
THRSP	15.9102	-3.73681	0.332486	-11.239	2.62e-29	2.12e-27	THRSP	down
LCA5	305.865	-1.13995	0.101439	-11.2378	2.66e-29	2.14e-27	LCA5	down
MAMLD1	256.238	-1.60132	0.142522	-11.2356	2.72e-29	2.19e-27	MAMLD1	down
AMH	97.5125	3.18504	0.283615	11.2302	2.9e-29	2.32e-27	AMH	up
NECAB1	201.665	-1.76885	0.157509	-11.2301	2.9e-29	2.32e-27	NECAB1	down
AC005180.2	218.898	-2.05252	0.182774	-11.2298	2.91e-29	2.32e-27	AC005180.2	down
PAK3	214.499	-1.86021	0.165668	-11.2285	2.95e-29	2.35e-27	PAK3	down
AL354824.1	1.98378	-2.57904	0.229742	-11.2258	3.05e-29	2.42e-27	AL354824.1	down
EEF1AKMT4	197.153	1.36512	0.121657	11.2211	3.21e-29	2.55e-27	EEF1AKMT4	up
AP003548.1	5.59924	-2.10179	0.18749	-11.2101	3.64e-29	2.88e-27	AP003548.1	down
NME1	958.724	1.38135	0.12323	11.2096	3.66e-29	2.89e-27	NME1	up
ALB	214.232	3.59085	0.320376	11.2082	3.72e-29	2.93e-27	ALB	up
GPD1	42.4809	-2.46808	0.220312	-11.2027	3.96e-29	3.12e-27	GPD1	down
ASPHD1	387.599	1.77122	0.158138	11.2005	4.06e-29	3.19e-27	ASPHD1	up
USP44	43.9233	-1.55527	0.138883	-11.1984	4.15e-29	3.26e-27	USP44	down
PHYHIPL	109.873	-2.10743	0.188226	-11.1963	4.25e-29	3.33e-27	PHYHIPL	down
AL356417.1	2.61784	-2.73628	0.244467	-11.1928	4.42e-29	3.46e-27	AL356417.1	down
AC027130.1	3.13052	-3.47726	0.310785	-11.1886	4.64e-29	3.62e-27	AC027130.1	down
EPS15-AS1	84.0299	1.56162	0.139744	11.1749	5.41e-29	4.21e-27	EPS15-AS1	up
EPHA8	34.4696	3.00776	0.269176	11.1739	5.47e-29	4.25e-27	EPHA8	up
FABP5	1174.31	3.20189	0.286795	11.1644	6.09e-29	4.72e-27	FABP5	up
FAM183DP	2.06586	-4.59419	0.411653	-11.1603	6.37e-29	4.93e-27	FAM183DP	down
DCHS2	78.5309	-2.20346	0.197454	-11.1593	6.45e-29	4.98e-27	DCHS2	down
NPTN	6534.41	-0.729923	0.0654189	-11.1577	6.57e-29	5.06e-27	NPTN	no
MBNL1-AS1	400.686	-1.42923	0.1281	-11.1571	6.61e-29	5.09e-27	MBNL1-AS1	down
INPP5F	928.93	-0.709537	0.0636756	-11.143	7.75e-29	5.95e-27	INPP5F	no
ICA1	3518.26	0.801225	0.0719849	11.1305	8.92e-29	6.84e-27	ICA1	no
C1QTNF1	1895.25	-1.67573	0.150558	-11.1301	8.96e-29	6.85e-27	C1QTNF1	down
SPTY2D1OS	84.3169	1.09736	0.0985962	11.1299	8.98e-29	6.85e-27	SPTY2D1OS	up
YAP1	5218.22	-0.881011	0.0792139	-11.1219	9.81e-29	7.48e-27	YAP1	no
KCNS1	93.2593	-2.72345	0.24489	-11.1211	9.91e-29	7.54e-27	KCNS1	down
GLYATL1P4	19.8313	2.85411	0.25682	11.1133	1.08e-28	8.21e-27	GLYATL1P4	up
CHMP1B	2324.28	-0.635711	0.0572118	-11.1115	1.1e-28	8.35e-27	CHMP1B	no
SLC6A2	11.0646	-2.1991	0.198104	-11.1007	1.24e-28	9.41e-27	SLC6A2	down
KANK2	7160.76	-1.28559	0.115868	-11.0953	1.32e-28	9.98e-27	KANK2	down
STX19	605.972	1.4597	0.131626	11.0897	1.41e-28	1.06e-26	STX19	up
PLEKHG3	1460.04	-1.02391	0.092381	-11.0836	1.51e-28	1.13e-26	PLEKHG3	down
HMGB1P1	14.3762	-1.39577	0.125937	-11.0831	1.51e-28	1.14e-26	HMGB1P1	down
APOF	447.567	2.378	0.214584	11.0819	1.54e-28	1.15e-26	APOF	up
KCTD14	51.0445	-1.9622	0.17707	-11.0815	1.54e-28	1.15e-26	KCTD14	down
TLN1	21531.6	-0.889584	0.0803073	-11.0773	1.62e-28	1.21e-26	TLN1	no
AC009102.2	4.5039	-2.56219	0.231408	-11.0722	1.71e-28	1.28e-26	AC009102.2	down
TRGV9	1831.5	2.51669	0.227433	11.0656	1.84e-28	1.37e-26	TRGV9	up
FBLIM1	4418.07	-0.882892	0.0797935	-11.0647	1.86e-28	1.38e-26	FBLIM1	no
TLCD1	884.532	1.33534	0.120695	11.0637	1.88e-28	1.39e-26	TLCD1	up
CCDC69	1782.94	-1.41744	0.128196	-11.0568	2.03e-28	1.5e-26	CCDC69	down
EFNA2	38.0575	3.05795	0.276748	11.0495	2.2e-28	1.62e-26	EFNA2	up
ZNF154	170.446	-1.5627	0.141425	-11.0497	2.2e-28	1.62e-26	ZNF154	down
DAAM2	891.949	-1.72271	0.156051	-11.0394	2.47e-28	1.81e-26	DAAM2	down
SCN5A	51.0115	-1.83023	0.165801	-11.0387	2.49e-28	1.82e-26	SCN5A	down
RIMS3	303.992	-1.30148	0.117983	-11.0311	2.7e-28	1.98e-26	RIMS3	down
LINC00891	2.45852	-2.49772	0.226433	-11.0307	2.72e-28	1.99e-26	LINC00891	down
CLCNKB	27.9718	-1.94032	0.175909	-11.0303	2.73e-28	1.99e-26	CLCNKB	down
LCN15	25.3545	-3.41135	0.309275	-11.0301	2.73e-28	1.99e-26	LCN15	down
ALAD	2988.22	-0.952611	0.0864167	-11.0235	2.95e-28	2.14e-26	ALAD	no
TMEM117	355.661	-0.762754	0.0691933	-11.0235	2.94e-28	2.14e-26	TMEM117	no
HFE	464.463	-1.35762	0.123174	-11.022	2.99e-28	2.17e-26	HFE	down
CLDN19	6.58699	-2.63381	0.239007	-11.0198	3.07e-28	2.22e-26	CLDN19	down
ADAM2	195.835	3.65056	0.331335	11.0177	3.14e-28	2.27e-26	ADAM2	up
AC079612.1	2.21458	-5.52056	0.501117	-11.0165	3.18e-28	2.29e-26	AC079612.1	down
AC027601.5	85.792	1.89884	0.17238	11.0155	3.22e-28	2.32e-26	AC027601.5	up
AC092376.3	13.155	-2.04061	0.185274	-11.014	3.27e-28	2.35e-26	AC092376.3	down
BMERB1	1060.6	-1.26213	0.114634	-11.0101	3.42e-28	2.45e-26	BMERB1	down
KCNJ1	5.14282	-2.86763	0.260497	-11.0083	3.49e-28	2.49e-26	KCNJ1	down
MUC15	95.4751	-2.68504	0.24391	-11.0083	3.48e-28	2.49e-26	MUC15	down
RHPN1	1756.62	1.55754	0.141494	11.0078	3.5e-28	2.5e-26	RHPN1	up
TRPM5	21.0588	-3.31394	0.301427	-10.9942	4.08e-28	2.9e-26	TRPM5	down
DNAJC18	560.252	-0.798665	0.0726719	-10.99	4.27e-28	3.03e-26	DNAJC18	no
GTSE1	137.704	1.90654	0.173504	10.9885	4.34e-28	3.08e-26	GTSE1	up
ANXA2P2	109.687	-1.45772	0.132668	-10.9877	4.38e-28	3.1e-26	ANXA2P2	down
CCDC83	18.567	2.87868	0.262018	10.9866	4.43e-28	3.13e-26	CCDC83	up
PGM5P4	14.8657	-2.14054	0.194832	-10.9866	4.43e-28	3.13e-26	PGM5P4	down
LPIN1	1213.93	-0.90651	0.0826196	-10.9721	5.21e-28	3.67e-26	LPIN1	no
AC105450.1	25.0399	2.42516	0.221036	10.9718	5.22e-28	3.67e-26	AC105450.1	up
SLC9A4	5.48577	-3.27394	0.298405	-10.9715	5.24e-28	3.68e-26	SLC9A4	down
PCP4L1	193.8	-2.26084	0.206115	-10.9689	5.39e-28	3.78e-26	PCP4L1	down
PLAG1	114.633	-1.65169	0.150643	-10.9643	5.67e-28	3.97e-26	PLAG1	down
NCS1	2968.67	-1.23511	0.112749	-10.9545	6.32e-28	4.42e-26	NCS1	down
PPP1R3C	634.19	-1.70411	0.155578	-10.9534	6.4e-28	4.46e-26	PPP1R3C	down
DLX1	1930.71	2.9293	0.26746	10.9523	6.48e-28	4.51e-26	DLX1	up
LINC00857	40.3884	-1.47155	0.134401	-10.949	6.72e-28	4.67e-26	LINC00857	down
LINC02492	31.8421	2.93163	0.267757	10.9488	6.73e-28	4.67e-26	LINC02492	up
GLCE	913.802	-0.767383	0.0701029	-10.9465	6.9e-28	4.78e-26	GLCE	no
CERK	943.218	-1.26521	0.115594	-10.9454	6.99e-28	4.83e-26	CERK	down
STAC	415.837	-2.461	0.224954	-10.94	7.42e-28	5.12e-26	STAC	down
RBFOX2	4484.34	-0.699188	0.0639211	-10.9383	7.56e-28	5.21e-26	RBFOX2	no
CTTNBP2	246.164	-1.52977	0.139857	-10.9381	7.58e-28	5.21e-26	CTTNBP2	down
CLEC18B	22.2787	2.14139	0.195957	10.9279	8.48e-28	5.82e-26	CLEC18B	up
PPP3CB	3257.28	-0.498751	0.0456619	-10.9227	8.98e-28	6.15e-26	PPP3CB	no
TNMD	23.3854	-3.34406	0.306401	-10.914	9.88e-28	6.76e-26	TNMD	down
OXR1	1809.17	-0.935422	0.0857186	-10.9127	1e-27	6.84e-26	OXR1	no
AC148477.2	1.61537	-3.05476	0.279966	-10.9112	1.02e-27	6.95e-26	AC148477.2	down
SEC16A	16502.2	0.785747	0.072047	10.906	1.08e-27	7.34e-26	SEC16A	no
KANK1	3553.45	-0.986458	0.0904814	-10.9023	1.12e-27	7.63e-26	KANK1	no
PADI3	52.0683	-4.37672	0.401506	-10.9008	1.14e-27	7.75e-26	PADI3	down
MECOM	710.704	-1.49499	0.137153	-10.9002	1.15e-27	7.79e-26	MECOM	down
SEPTIN5	13.0629	2.30914	0.211885	10.8981	1.18e-27	7.96e-26	SEPTIN5	up
AP4S1	461.535	-0.541298	0.0496774	-10.8963	1.2e-27	8.1e-26	AP4S1	no
DENND2B	1927.96	-1.23205	0.113079	-10.8954	1.21e-27	8.17e-26	DENND2B	down
RTN4RL2	131.755	1.36521	0.125351	10.8911	1.27e-27	8.54e-26	RTN4RL2	up
ACE	1128.08	-1.36324	0.1252	-10.8885	1.31e-27	8.78e-26	ACE	down
TMOD2	602.002	-1.09151	0.100257	-10.887	1.33e-27	8.91e-26	TMOD2	down
ERVE-1	163.318	-1.5783	0.144975	-10.8867	1.33e-27	8.93e-26	ERVE-1	down
CDC20	293.993	1.89826	0.17442	10.8833	1.38e-27	9.25e-26	CDC20	up
CCDC85A	30.3874	-1.86894	0.171748	-10.8819	1.41e-27	9.38e-26	CCDC85A	down
ARHGEF9	1429.36	-0.718431	0.0660228	-10.8816	1.41e-27	9.4e-26	ARHGEF9	no
MAPRE1	5686.75	-0.464183	0.0426646	-10.8798	1.44e-27	9.56e-26	MAPRE1	no
AC073343.1	27.0769	-1.24913	0.114851	-10.8761	1.5e-27	9.95e-26	AC073343.1	down
ATP10B	11.1033	-2.9779	0.273814	-10.8756	1.51e-27	9.98e-26	ATP10B	down
POU5F1B	133.791	1.5492	0.142461	10.8746	1.52e-27	1.01e-25	POU5F1B	up
GAS1RR	108.514	-1.77995	0.163724	-10.8717	1.57e-27	1.04e-25	GAS1RR	down
TMEM237	996.957	-0.698446	0.0642558	-10.8698	1.61e-27	1.06e-25	TMEM237	no
SEMA6D	249.098	-1.75884	0.161834	-10.8682	1.63e-27	1.08e-25	SEMA6D	down
SYNPO2	23240.6	-1.91384	0.176142	-10.8653	1.69e-27	1.11e-25	SYNPO2	down
KITLG	1286.34	-1.32223	0.121755	-10.8598	1.79e-27	1.18e-25	KITLG	down
CDC42EP3	4645.49	-1.17578	0.108338	-10.8529	1.93e-27	1.27e-25	CDC42EP3	down
SNORD104	101.515	2.19312	0.202109	10.8512	1.97e-27	1.29e-25	SNORD104	up
AC020656.2	46.9859	3.2379	0.29844	10.8494	2.01e-27	1.31e-25	AC020656.2	up
MANEAL	523.245	1.16783	0.107662	10.8472	2.06e-27	1.34e-25	MANEAL	up
DSTN	33263.4	-0.739376	0.0682112	-10.8395	2.24e-27	1.46e-25	DSTN	no
MSRB3	3457.17	-1.5767	0.145495	-10.8368	2.3e-27	1.5e-25	MSRB3	down
ARVCF	2150.09	0.82635	0.0762691	10.8347	2.36e-27	1.53e-25	ARVCF	no
HOXB2	224.744	-1.75238	0.161851	-10.8271	2.56e-27	1.66e-25	HOXB2	down
EYA4	296.58	-1.75536	0.162157	-10.8251	2.62e-27	1.69e-25	EYA4	down
AC116345.4	1.68812	-4.47745	0.413847	-10.8191	2.8e-27	1.8e-25	AC116345.4	down
MTG1	237.396	1.43084	0.132255	10.8188	2.81e-27	1.81e-25	MTG1	up
POLR2H	2669.83	0.862758	0.0797686	10.8158	2.9e-27	1.87e-25	POLR2H	no
MEX3D	1567	0.801299	0.0741803	10.8021	3.37e-27	2.16e-25	MEX3D	no
AC009407.1	63.4588	2.3439	0.217004	10.8012	3.4e-27	2.18e-25	AC009407.1	up
OR51C1P	192.08	3.24871	0.300863	10.798	3.52e-27	2.25e-25	OR51C1P	up
CTU1	236.928	1.17725	0.109059	10.7945	3.65e-27	2.34e-25	CTU1	up
CSRP1	45760.1	-1.50603	0.139533	-10.7934	3.7e-27	2.36e-25	CSRP1	down
AC104088.3	25.1584	-2.26277	0.209695	-10.7908	3.81e-27	2.42e-25	AC104088.3	down
LINC00958	36.4572	-2.68025	0.248382	-10.7908	3.8e-27	2.42e-25	LINC00958	down
C19orf48	18273.5	1.41192	0.130907	10.7857	4.02e-27	2.56e-25	C19orf48	up
FAXDC2	1385.04	-1.46583	0.13596	-10.7814	4.21e-27	2.67e-25	FAXDC2	down
ABCA4	36.2635	-1.93889	0.179846	-10.7808	4.24e-27	2.69e-25	ABCA4	down
CHTF18	752.939	1.25665	0.116607	10.7768	4.43e-27	2.8e-25	CHTF18	up
TEDC2	170.378	1.4025	0.130174	10.774	4.57e-27	2.88e-25	TEDC2	up
AC023794.3	3.78661	-2.19205	0.203477	-10.773	4.62e-27	2.91e-25	AC023794.3	down
EPHB1	123.805	-2.14738	0.199353	-10.7717	4.68e-27	2.95e-25	EPHB1	down
GSTM4	813.374	-1.24936	0.116009	-10.7695	4.79e-27	3.01e-25	GSTM4	down
TARBP1	2394.66	1.00025	0.0928843	10.7688	4.83e-27	3.03e-25	TARBP1	up
KIF9	499.531	0.91949	0.0854215	10.7641	5.08e-27	3.18e-25	KIF9	no
AC006970.1	1.5174	-2.58525	0.240279	-10.7593	5.35e-27	3.35e-25	AC006970.1	down
AC026356.2	85.9929	1.95911	0.182146	10.7557	5.57e-27	3.48e-25	AC026356.2	up
ALDH1A2	1167.03	-1.71639	0.159585	-10.7553	5.59e-27	3.49e-25	ALDH1A2	down
LURAP1	55.7673	-1.44687	0.134545	-10.7538	5.69e-27	3.54e-25	LURAP1	down
CLIP4	998.052	-1.20363	0.111936	-10.7529	5.74e-27	3.57e-25	CLIP4	down
LINC00683	89.6898	-1.76575	0.164234	-10.7514	5.84e-27	3.62e-25	LINC00683	down
RPS17	211.461	1.3152	0.122351	10.7494	5.97e-27	3.7e-25	RPS17	up
WDR48	2458.7	-0.42506	0.0395479	-10.748	6.06e-27	3.75e-25	WDR48	no
ERBB4	148.644	-1.93603	0.180167	-10.7458	6.2e-27	3.83e-25	ERBB4	down
E2F5	457.044	1.022	0.0951109	10.7454	6.23e-27	3.84e-25	E2F5	up
LEPROT	4373.4	-0.526605	0.0490116	-10.7445	6.29e-27	3.87e-25	LEPROT	no
RAPGEFL1	596.841	-1.44528	0.13458	-10.7392	6.67e-27	4.1e-25	RAPGEFL1	down
MPZL2	4141.46	-1.07864	0.100447	-10.7384	6.72e-27	4.13e-25	MPZL2	down
EPHA2	934.543	-1.94784	0.181443	-10.7353	6.95e-27	4.26e-25	EPHA2	down
AC074212.1	107.029	2.02357	0.188523	10.7338	7.06e-27	4.32e-25	AC074212.1	up
GPX2	284.298	-2.56343	0.238883	-10.7309	7.29e-27	4.45e-25	GPX2	down
CBX7	3395.77	-0.858716	0.0800445	-10.728	7.52e-27	4.59e-25	CBX7	no
ADAMTS5	376.541	-1.88114	0.175421	-10.7236	7.89e-27	4.8e-25	ADAMTS5	down
LVRN	5.78988	-2.11053	0.196862	-10.7209	8.12e-27	4.94e-25	LVRN	down
LINC02707	2.13895	-6.25115	0.583191	-10.7189	8.3e-27	5.04e-25	LINC02707	down
SSBP2	1212.44	-0.777387	0.0725584	-10.7139	8.76e-27	5.31e-25	SSBP2	no
TFF3	15371.6	3.2241	0.300973	10.7122	8.92e-27	5.4e-25	TFF3	up
BDH1	2956.33	0.910724	0.0850513	10.7079	9.34e-27	5.65e-25	BDH1	no
CRTAP	9029.29	-0.596118	0.055678	-10.7065	9.49e-27	5.73e-25	CRTAP	no
DNAJB5	1327.79	-1.47592	0.137854	-10.7064	9.5e-27	5.73e-25	DNAJB5	down
PIK3R1	3908.65	-1.04715	0.0978199	-10.7048	9.66e-27	5.81e-25	PIK3R1	down
LINC01134	57.8146	1.32234	0.12354	10.7038	9.77e-27	5.87e-25	LINC01134	up
GRK2	12360.2	0.671851	0.0627867	10.7005	1.01e-26	6.07e-25	GRK2	no
ADGRD2	22.5072	-3.06948	0.28694	-10.6973	1.05e-26	6.28e-25	ADGRD2	down
DPH3	1132.93	-0.523418	0.0489372	-10.6957	1.07e-26	6.38e-25	DPH3	no
GNAL	523.836	-1.47825	0.13824	-10.6934	1.09e-26	6.53e-25	GNAL	down
CCDC181	60.9596	-1.32614	0.124032	-10.692	1.11e-26	6.62e-25	CCDC181	down
FEZ1	475.289	-1.2775	0.119483	-10.6919	1.11e-26	6.62e-25	FEZ1	down
TAF3	574.629	-0.573369	0.0536288	-10.6914	1.12e-26	6.64e-25	TAF3	no
AC092851.1	1.42748	-3.65814	0.342382	-10.6844	1.2e-26	7.14e-25	AC092851.1	down
TMEM43	3464	-0.502123	0.0469955	-10.6845	1.2e-26	7.14e-25	TMEM43	no
GPR156	25.5319	-1.39598	0.130674	-10.6829	1.22e-26	7.25e-25	GPR156	down
KLHL17	427.021	1.10532	0.103482	10.6813	1.25e-26	7.36e-25	KLHL17	up
STX12	3140.17	-0.448536	0.042027	-10.6726	1.37e-26	8.08e-25	STX12	no
AC100860.1	2.39978	-2.27805	0.213483	-10.6709	1.39e-26	8.21e-25	AC100860.1	down
RARB	626.172	-0.990887	0.0928646	-10.6702	1.4e-26	8.26e-25	RARB	no
AC084864.1	14.1884	1.70457	0.159759	10.6696	1.41e-26	8.3e-25	AC084864.1	up
CHRDL1	4207.18	-1.96488	0.18422	-10.6659	1.47e-26	8.62e-25	CHRDL1	down
CLIC4	8199.25	-1.07583	0.10088	-10.6644	1.49e-26	8.75e-25	CLIC4	down
ABCC4	33957.1	1.65033	0.154782	10.6622	1.53e-26	8.95e-25	ABCC4	up
AC009812.4	264.333	1.25284	0.117509	10.6617	1.54e-26	8.99e-25	AC009812.4	up
TSPAN19	83.2711	3.17086	0.29748	10.6591	1.58e-26	9.23e-25	TSPAN19	up
SIAH3	10.2294	-2.48307	0.23298	-10.6578	1.6e-26	9.34e-25	SIAH3	down
LINC01169	12.547	3.37948	0.317251	10.6524	1.7e-26	9.89e-25	LINC01169	up
TCF7L1	814.389	-1.25267	0.117632	-10.649	1.76e-26	1.02e-24	TCF7L1	down
AHNAK2	1516.26	-1.80895	0.169906	-10.6468	1.8e-26	1.05e-24	AHNAK2	down
LHX1	6.31419	-6.34717	0.596153	-10.6469	1.8e-26	1.05e-24	LHX1	down
TSPAN3	7846.24	-0.678195	0.0637228	-10.6429	1.88e-26	1.09e-24	TSPAN3	no
SLCO3A1	455.973	-1.34503	0.126397	-10.6414	1.91e-26	1.11e-24	SLCO3A1	down
BICD1	2106.51	1.55983	0.146598	10.6401	1.94e-26	1.12e-24	BICD1	up
LINC01977	93.3146	1.8231	0.171354	10.6394	1.95e-26	1.13e-24	LINC01977	up
F12	128.089	1.97081	0.185279	10.637	2.01e-26	1.15e-24	F12	up
HECTD2	928.64	-0.99524	0.0935691	-10.6364	2.02e-26	1.16e-24	HECTD2	no
KAT2A	3545.82	0.994685	0.0935544	10.6321	2.11e-26	1.21e-24	KAT2A	no
ERGIC1	46182.9	0.766879	0.0721317	10.6317	2.12e-26	1.22e-24	ERGIC1	no
PTRHD1	1035.28	1.14144	0.10746	10.6221	2.35e-26	1.35e-24	PTRHD1	up
AC008555.2	157.709	2.23984	0.210882	10.6213	2.37e-26	1.35e-24	AC008555.2	up
CACNA1D	3070.85	2.18473	0.205696	10.6212	2.38e-26	1.35e-24	CACNA1D	up
HJURP	231.602	2.0188	0.19008	10.6208	2.39e-26	1.36e-24	HJURP	up
ARHGDIG	122.086	2.74064	0.258058	10.6202	2.4e-26	1.36e-24	ARHGDIG	up
CDHR1	102.269	-1.9473	0.183408	-10.6173	2.48e-26	1.41e-24	CDHR1	down
TP53INP1	8777.58	1.10563	0.104142	10.6166	2.5e-26	1.41e-24	TP53INP1	up
TMEM19	789.587	-0.592854	0.0558575	-10.6137	2.57e-26	1.46e-24	TMEM19	no
PGBD4P8	40.618	3.9135	0.368748	10.6129	2.59e-26	1.47e-24	PGBD4P8	up
RBMS3-AS3	25.9273	-1.74295	0.164258	-10.6111	2.65e-26	1.49e-24	RBMS3-AS3	down
CORO2B	117.34	-1.39547	0.131538	-10.6089	2.71e-26	1.53e-24	CORO2B	down
AC188616.1	71.2745	1.57166	0.148149	10.6086	2.72e-26	1.53e-24	AC188616.1	up
ZNF74	993.409	0.611082	0.0576033	10.6085	2.72e-26	1.53e-24	ZNF74	no
ACSS1	8010.84	0.799061	0.0753395	10.6061	2.79e-26	1.57e-24	ACSS1	no
OGFRP1	261.909	0.812891	0.0766503	10.6052	2.82e-26	1.58e-24	OGFRP1	no
CYP3A5	727.338	-1.58322	0.149302	-10.6042	2.85e-26	1.6e-24	CYP3A5	down
KIT	500.209	-1.74561	0.164631	-10.6031	2.88e-26	1.61e-24	KIT	down
CERS4	9064.74	0.983139	0.0927733	10.5972	3.07e-26	1.71e-24	CERS4	no
AC068205.2	97.2034	1.58167	0.149358	10.5898	3.32e-26	1.85e-24	AC068205.2	up
SH3PXD2B	1443.2	-1.14426	0.108054	-10.5897	3.33e-26	1.85e-24	SH3PXD2B	down
AF111167.2	50.5429	-1.22715	0.115908	-10.5873	3.41e-26	1.9e-24	AF111167.2	down
PRICKLE2	660.118	-1.39528	0.131816	-10.585	3.5e-26	1.94e-24	PRICKLE2	down
EHMT2-AS1	148.484	1.36518	0.129022	10.581	3.65e-26	2.02e-24	EHMT2-AS1	up
ZNF649-AS1	13.4693	2.05474	0.194219	10.5795	3.71e-26	2.05e-24	ZNF649-AS1	up
MGAT4B	4370.64	0.68673	0.064922	10.5778	3.78e-26	2.09e-24	MGAT4B	no
INKA2	413.315	-0.999735	0.09453	-10.5759	3.86e-26	2.13e-24	INKA2	no
AC018755.3	42.6472	1.64724	0.155854	10.5691	4.15e-26	2.29e-24	AC018755.3	up
GFRA2	79.7499	-1.67989	0.159005	-10.565	4.33e-26	2.38e-24	GFRA2	down
PPAN	212.427	0.783697	0.0741807	10.5647	4.34e-26	2.39e-24	PPAN	no
PDK2	1142.54	-0.791073	0.0749096	-10.5604	4.55e-26	2.5e-24	PDK2	no
BNIP3L	4617.59	-0.791317	0.0749358	-10.5599	4.57e-26	2.51e-24	BNIP3L	no
HLCS	4510.84	0.785065	0.0743461	10.5596	4.59e-26	2.51e-24	HLCS	no
L3MBTL4	112.551	-1.57718	0.149417	-10.5556	4.79e-26	2.62e-24	L3MBTL4	down
TNK2	4844.32	0.886975	0.0840329	10.5551	4.81e-26	2.63e-24	TNK2	no
TMEM127	5348.58	-0.444484	0.0421202	-10.5528	4.93e-26	2.69e-24	TMEM127	no
TMCC1-AS1	274.858	1.0384	0.0984037	10.5524	4.95e-26	2.7e-24	TMCC1-AS1	up
LINC01019	31.9739	3.90368	0.369966	10.5514	5e-26	2.72e-24	LINC01019	up
CCDC40	591.818	0.947162	0.0897897	10.5487	5.15e-26	2.8e-24	CCDC40	no
STOX2	246.222	-1.53075	0.145157	-10.5455	5.33e-26	2.89e-24	STOX2	down
LRCOL1	9.30371	-2.46888	0.234132	-10.5448	5.37e-26	2.91e-24	LRCOL1	down
GNAI2	10824.3	-0.666344	0.0632282	-10.5387	5.73e-26	3.09e-24	GNAI2	no
VAMP4	930.932	-0.478484	0.045402	-10.5388	5.72e-26	3.09e-24	VAMP4	no
AC133963.1	0.899581	-3.61111	0.342671	-10.5381	5.76e-26	3.11e-24	AC133963.1	down
BOP1	3345.84	1.18917	0.112889	10.534	6.02e-26	3.25e-24	BOP1	up
RERG	664.815	-1.23189	0.116975	-10.5312	6.2e-26	3.34e-24	RERG	down
LINC00939	96.5344	2.50218	0.237669	10.528	6.42e-26	3.45e-24	LINC00939	up
SLC27A4	2836.83	0.834696	0.0792969	10.5262	6.54e-26	3.51e-24	SLC27A4	no
RRM2	480.383	1.86623	0.177319	10.5247	6.65e-26	3.56e-24	RRM2	up
PIWIL4	78.6472	-1.03161	0.0980401	-10.5223	6.82e-26	3.65e-24	PIWIL4	down
HOXB4	69.5899	-2.0394	0.193842	-10.5209	6.92e-26	3.7e-24	HOXB4	down
LSM11	558.007	-0.832131	0.0790957	-10.5206	6.95e-26	3.71e-24	LSM11	no
C21orf62	50.0958	-2.58729	0.245936	-10.5202	6.97e-26	3.72e-24	C21orf62	down
PKP3	4206.99	0.902587	0.0858543	10.513	7.53e-26	4.01e-24	PKP3	no
TLR2	325.592	-1.47868	0.140735	-10.5068	8.04e-26	4.27e-24	TLR2	down
CEP68	1283.51	-0.765475	0.072863	-10.5057	8.13e-26	4.32e-24	CEP68	no
AC026471.6	19.4778	-1.38097	0.131452	-10.5055	8.15e-26	4.32e-24	AC026471.6	down
MAP1A	1032.68	-1.58204	0.15066	-10.5007	8.57e-26	4.54e-24	MAP1A	down
COL4A6	987.813	-1.89146	0.180202	-10.4963	8.98e-26	4.75e-24	COL4A6	down
JPH4	768.079	-2.10419	0.200491	-10.4952	9.09e-26	4.8e-24	JPH4	down
PAOX	85.1209	1.67421	0.159531	10.4946	9.15e-26	4.83e-24	PAOX	up
TRAF4	4153.41	0.862516	0.0822136	10.4912	9.49e-26	5e-24	TRAF4	no
SSX2IP	1168.94	-0.642849	0.061281	-10.4902	9.58e-26	5.04e-24	SSX2IP	no
PRKCB	655.361	-1.83649	0.175072	-10.4899	9.61e-26	5.05e-24	PRKCB	down
RNF157	790.421	2.2832	0.21766	10.4897	9.63e-26	5.05e-24	RNF157	up
HSPA4L	417.293	-1.48041	0.141179	-10.4861	1e-25	5.25e-24	HSPA4L	down
ZNF485	221.462	0.747673	0.0713275	10.4823	1.04e-25	5.45e-24	ZNF485	no
RGS11	638.69	1.76408	0.168298	10.4819	1.05e-25	5.47e-24	RGS11	up
CDKN2AIP	1213.94	-0.487211	0.0464915	-10.4796	1.07e-25	5.6e-24	CDKN2AIP	no
EPB41L1	2682.72	-0.66451	0.063411	-10.4794	1.07e-25	5.6e-24	EPB41L1	no
JAZF1	925.759	-1.32029	0.126035	-10.4755	1.12e-25	5.83e-24	JAZF1	down
ANXA6	7034.37	-1.21495	0.11602	-10.4719	1.16e-25	6.05e-24	ANXA6	down
AC009902.2	31.733	2.35502	0.224948	10.4692	1.2e-25	6.21e-24	AC009902.2	up
ICA1L	459.704	-0.84989	0.0812322	-10.4625	1.28e-25	6.66e-24	ICA1L	no
PAFAH1B2P2	14.0305	-3.20665	0.306501	-10.4621	1.29e-25	6.68e-24	PAFAH1B2P2	down
ATP2B4	5407.98	-1.50522	0.143911	-10.4594	1.33e-25	6.86e-24	ATP2B4	down
KLHL35	125.4	1.63611	0.15644	10.4583	1.34e-25	6.93e-24	KLHL35	up
SNX7	558.1	-1.11865	0.106992	-10.4555	1.38e-25	7.13e-24	SNX7	down
AC012101.2	34.3835	-2.01001	0.192322	-10.4513	1.45e-25	7.45e-24	AC012101.2	down
B3GNT9	504.588	-1.26931	0.121472	-10.4494	1.47e-25	7.59e-24	B3GNT9	down
LETM1	2774.37	0.633543	0.0606402	10.4476	1.5e-25	7.72e-24	LETM1	no
AC087741.1	512.307	1.64952	0.157908	10.4461	1.53e-25	7.84e-24	AC087741.1	up
CELSR2	1640.67	-1.07001	0.102473	-10.4419	1.6e-25	8.18e-24	CELSR2	down
GGA2	4778.96	-0.494947	0.0474023	-10.4414	1.6e-25	8.21e-24	GGA2	no
MCC	1419.26	-1.40092	0.134186	-10.4401	1.63e-25	8.32e-24	MCC	down
MR1	1067.92	-1.20091	0.115035	-10.4395	1.64e-25	8.36e-24	MR1	down
DEFB129	2.64375	-5.25621	0.503762	-10.4339	1.74e-25	8.85e-24	DEFB129	down
HSPB8	4988.66	-1.89328	0.181524	-10.4299	1.81e-25	9.23e-24	HSPB8	down
CCSER2	2290.08	-0.752092	0.072128	-10.4272	1.86e-25	9.48e-24	CCSER2	no
TAF7L	16.6108	-1.74379	0.167245	-10.4265	1.88e-25	9.53e-24	TAF7L	down
ANKRD34B	424.236	4.12023	0.395197	10.4258	1.89e-25	9.6e-24	ANKRD34B	up
FOXN4	27.2799	2.78218	0.266887	10.4246	1.92e-25	9.71e-24	FOXN4	up
FBXO32	5857.59	-1.02683	0.0985111	-10.4235	1.94e-25	9.81e-24	FBXO32	down
CIRBP-AS1	85.7626	1.2326	0.118273	10.4216	1.98e-25	9.98e-24	CIRBP-AS1	up
AC092376.2	65.2879	-1.75093	0.168015	-10.4213	1.98e-25	1e-23	AC092376.2	down
SLC18A2	108.44	-2.56527	0.246233	-10.418	2.05e-25	1.03e-23	SLC18A2	down
TSACC	33.9392	1.36646	0.131166	10.4178	2.06e-25	1.04e-23	TSACC	up
POLD4	620.5	0.996037	0.095621	10.4165	2.08e-25	1.05e-23	POLD4	no
PXYLP1	1414.3	-0.765115	0.0734546	-10.4162	2.09e-25	1.05e-23	PXYLP1	no
AL353803.1	6.39595	-2.46847	0.237034	-10.414	2.14e-25	1.07e-23	AL353803.1	down
HES4	902.266	1.67803	0.161166	10.4118	2.19e-25	1.1e-23	HES4	up
ARHGAP20	255.532	-1.71932	0.165196	-10.4078	2.28e-25	1.14e-23	ARHGAP20	down
TWIST1	599.419	2.11075	0.202828	10.4066	2.31e-25	1.16e-23	TWIST1	up
PATE3	11.0557	-6.03314	0.579797	-10.4056	2.34e-25	1.17e-23	PATE3	down
AC105219.3	84.1496	1.55911	0.149836	10.4054	2.34e-25	1.17e-23	AC105219.3	up
CDKL1	291.622	-0.84615	0.0813391	-10.4027	2.41e-25	1.2e-23	CDKL1	no
KLHL42	1763.86	-0.661556	0.0635955	-10.4026	2.41e-25	1.2e-23	KLHL42	no
SNORA73B	49.942	2.44021	0.234734	10.3957	2.59e-25	1.29e-23	SNORA73B	up
PDCD2L	201.952	0.859714	0.0827232	10.3927	2.68e-25	1.33e-23	PDCD2L	no
TBC1D1	2483.63	-0.986651	0.0949522	-10.391	2.72e-25	1.35e-23	TBC1D1	no
ARHGAP23	1391.68	-1.39713	0.134519	-10.3861	2.87e-25	1.42e-23	ARHGAP23	down
RPL7P16	3958.07	1.99402	0.191991	10.386	2.87e-25	1.42e-23	RPL7P16	up
PRKG1	384.697	-1.6401	0.157933	-10.3848	2.91e-25	1.44e-23	PRKG1	down
SLC12A8	1170.47	0.919616	0.088571	10.3828	2.97e-25	1.46e-23	SLC12A8	no
H2BC15	179.562	1.12012	0.107918	10.3794	3.08e-25	1.52e-23	H2BC15	up
DPYSL3	11347.5	-1.23447	0.118978	-10.3756	3.2e-25	1.57e-23	DPYSL3	down
RASL12	1939.58	-1.64406	0.158518	-10.3715	3.34e-25	1.64e-23	RASL12	down
AP002498.1	109.037	3.55268	0.342657	10.368	3.47e-25	1.7e-23	AP002498.1	up
CYB5R3	13840.4	-0.655729	0.0632596	-10.3657	3.55e-25	1.74e-23	CYB5R3	no
MOV10L1	150.732	2.21137	0.213366	10.3642	3.61e-25	1.76e-23	MOV10L1	up
STX7	2398.61	-0.490292	0.0473063	-10.3642	3.61e-25	1.76e-23	STX7	no
CCNI2	23.35	-2.40965	0.232519	-10.3633	3.64e-25	1.78e-23	CCNI2	down
HNRNPA1P33	48.133	1.81668	0.175338	10.361	3.73e-25	1.82e-23	HNRNPA1P33	up
SPINK1	607.702	4.19453	0.40499	10.3571	3.89e-25	1.89e-23	SPINK1	up
MSI1	914.446	1.03993	0.100411	10.3567	3.9e-25	1.9e-23	MSI1	up
FAR2P1	69.6391	2.90166	0.280245	10.354	4.01e-25	1.95e-23	FAR2P1	up
LINC02585	16.1416	1.53809	0.148574	10.3523	4.08e-25	1.98e-23	LINC02585	up
FOXQ1	446.994	-2.05494	0.198504	-10.3521	4.09e-25	1.98e-23	FOXQ1	down
TTLL12	7178.59	0.808773	0.0781326	10.3513	4.13e-25	2e-23	TTLL12	no
DIXDC1	2143.95	-1.10791	0.107039	-10.3505	4.16e-25	2.01e-23	DIXDC1	down
EPCAM	14570.7	1.06607	0.103008	10.3493	4.21e-25	2.04e-23	EPCAM	up
WFDC2	2689.09	-2.33896	0.226014	-10.3488	4.24e-25	2.04e-23	WFDC2	down
UBXN10	250.339	-1.84969	0.178785	-10.3458	4.37e-25	2.11e-23	UBXN10	down
MBNL2	2277.16	-1.11148	0.107468	-10.3424	4.53e-25	2.18e-23	MBNL2	down
RAP1GAP	7989.78	1.31739	0.127428	10.3383	4.73e-25	2.27e-23	RAP1GAP	up
FAM21EP	42.2487	1.27541	0.123372	10.3379	4.75e-25	2.28e-23	FAM21EP	up
OVCH2	19.46	-2.47796	0.239728	-10.3366	4.81e-25	2.31e-23	OVCH2	down
DARS-AS1	89.5931	1.08234	0.104727	10.3348	4.9e-25	2.35e-23	DARS-AS1	up
LINC01311	56.7553	1.62252	0.157014	10.3335	4.97e-25	2.38e-23	LINC01311	up
PLS3	2829.15	-1.23215	0.119308	-10.3275	5.29e-25	2.53e-23	PLS3	down
ACKR4	12.9327	-1.89028	0.183061	-10.326	5.38e-25	2.57e-23	ACKR4	down
TBX2	1011.48	-1.44444	0.139906	-10.3244	5.47e-25	2.61e-23	TBX2	down
KIAA0087	53.3197	3.48996	0.338189	10.3196	5.75e-25	2.74e-23	KIAA0087	up
AC005064.1	220.538	2.26294	0.219296	10.3191	5.78e-25	2.75e-23	AC005064.1	up
AP000696.1	170.062	1.90824	0.18497	10.3165	5.94e-25	2.82e-23	AP000696.1	up
PPP1R14B	3070.89	1.23278	0.119523	10.3142	6.08e-25	2.88e-23	PPP1R14B	up
PDZRN4	556.906	-1.70835	0.165675	-10.3114	6.26e-25	2.96e-23	PDZRN4	down
H2BU1	194.233	1.76604	0.171272	10.3113	6.27e-25	2.97e-23	H2BU1	up
FAM107A	2443.58	-1.64118	0.159182	-10.3101	6.34e-25	3e-23	FAM107A	down
FAM163B	12.657	-2.89034	0.280352	-10.3097	6.37e-25	3.01e-23	FAM163B	down
RAB38	83.3641	-1.50201	0.145752	-10.3052	6.67e-25	3.15e-23	RAB38	down
AC008764.8	57.205	1.25163	0.121465	10.3045	6.73e-25	3.17e-23	AC008764.8	up
FAM107B	4399.29	-1.1651	0.113074	-10.3039	6.76e-25	3.18e-23	FAM107B	down
TRGJP2	49.3046	1.90493	0.184887	10.3032	6.81e-25	3.2e-23	TRGJP2	up
METTL7A	4774.18	-1.09947	0.106763	-10.2982	7.18e-25	3.37e-23	METTL7A	down
MIR3659HG	9.22855	-1.80647	0.175422	-10.2979	7.2e-25	3.38e-23	MIR3659HG	down
CSK	4009.62	0.526445	0.0511241	10.2974	7.24e-25	3.39e-23	CSK	no
FBXL8	626.222	1.20248	0.116782	10.2968	7.28e-25	3.41e-23	FBXL8	up
AC144450.1	120.483	2.4676	0.239692	10.2949	7.43e-25	3.47e-23	AC144450.1	up
AC092919.2	17.9557	-1.58699	0.154253	-10.2883	7.96e-25	3.71e-23	AC092919.2	down
TPRN	2351.49	1.14093	0.110926	10.2856	8.19e-25	3.82e-23	TPRN	up
TERT	12.4165	2.62821	0.255537	10.2851	8.23e-25	3.83e-23	TERT	up
KLHL5	1324.39	-1.07996	0.105047	-10.2808	8.61e-25	4e-23	KLHL5	down
AC141930.1	114.148	2.31624	0.225378	10.2771	8.93e-25	4.15e-23	AC141930.1	up
PIPOX	130.353	-1.27768	0.124329	-10.2766	8.99e-25	4.17e-23	PIPOX	down
ZKSCAN2-DT	174.417	1.42056	0.138235	10.2764	9e-25	4.17e-23	ZKSCAN2-DT	up
MXRA7	4427.61	-1.25905	0.122577	-10.2715	9.47e-25	4.38e-23	MXRA7	down
NUDT19	1891.62	0.653941	0.0637046	10.2652	1.01e-24	4.67e-23	NUDT19	no
RPL17	162.682	1.09651	0.106839	10.2633	1.03e-24	4.76e-23	RPL17	up
LINC01320	5.67027	-3.42189	0.333443	-10.2623	1.04e-24	4.81e-23	LINC01320	down
TSLP	154.734	-1.85084	0.180441	-10.2573	1.1e-24	5.06e-23	TSLP	down
PPARGC1B	324.375	-1.26794	0.123626	-10.2563	1.11e-24	5.1e-23	PPARGC1B	down
FXYD6	389.68	-1.67737	0.163631	-10.2509	1.17e-24	5.39e-23	FXYD6	down
AC022893.1	59.9267	-1.47798	0.144247	-10.2462	1.23e-24	5.65e-23	AC022893.1	down
CNPY2	203.453	0.839811	0.0819648	10.246	1.23e-24	5.66e-23	CNPY2	no
DMRT2	8.89976	-3.07229	0.299982	-10.2416	1.29e-24	5.92e-23	DMRT2	down
HNRNPA1P57	44.8986	4.5884	0.448045	10.2409	1.3e-24	5.95e-23	HNRNPA1P57	up
AL022322.1	168.111	1.6877	0.164843	10.2382	1.34e-24	6.11e-23	AL022322.1	up
SLC25A33	1310.99	0.879561	0.0859109	10.2381	1.34e-24	6.11e-23	SLC25A33	no
SMKR1	121.681	1.62647	0.158919	10.2346	1.39e-24	6.33e-23	SMKR1	up
MEIS3P2	27.9549	-1.63977	0.160223	-10.2343	1.39e-24	6.34e-23	MEIS3P2	down
EBF2	194.773	2.20391	0.215421	10.2307	1.44e-24	6.57e-23	EBF2	up
CAMK2N2	129.17	1.74498	0.170597	10.2287	1.47e-24	6.7e-23	CAMK2N2	up
MUC6	7113.87	-5.03162	0.492264	-10.2214	1.59e-24	7.22e-23	MUC6	down
DLX2-DT	9.0556	2.58541	0.253023	10.2181	1.65e-24	7.46e-23	DLX2-DT	up
DNAJB4	750.139	-1.32577	0.129758	-10.2173	1.66e-24	7.52e-23	DNAJB4	down
OSBPL11	770.848	-0.645788	0.0632164	-10.2155	1.69e-24	7.65e-23	OSBPL11	no
AC010642.2	109.61	0.935317	0.0915653	10.2148	1.7e-24	7.7e-23	AC010642.2	no
PPARGC1A	286.904	-1.81175	0.177479	-10.2082	1.82e-24	8.22e-23	PPARGC1A	down
AC046168.1	2.46746	-2.00721	0.196655	-10.2067	1.85e-24	8.34e-23	AC046168.1	down
AC068669.1	19.6991	1.95999	0.19211	10.2024	1.93e-24	8.71e-23	AC068669.1	up
GDPD1	675.659	1.33956	0.1313	10.2022	1.94e-24	8.72e-23	GDPD1	up
AC015922.2	96.4161	-1.35849	0.133232	-10.1964	2.06e-24	9.24e-23	AC015922.2	down
LMO4	2515.22	-0.888195	0.0871264	-10.1943	2.1e-24	9.44e-23	LMO4	no
GLDN	53.999	-1.99668	0.195886	-10.1931	2.13e-24	9.55e-23	GLDN	down
FAM222A	697.641	1.70966	0.167771	10.1904	2.19e-24	9.8e-23	FAM222A	up
RHOXF1P3	34.365	2.9603	0.290528	10.1894	2.21e-24	9.89e-23	RHOXF1P3	up
GGCT	1843.44	1.24698	0.122384	10.189	2.22e-24	9.92e-23	GGCT	up
SOWAHC	1160.73	-0.756891	0.0742873	-10.1887	2.23e-24	9.94e-23	SOWAHC	no
AL360181.4	22.8824	2.74994	0.269926	10.1878	2.25e-24	1e-22	AL360181.4	up
PYY	6.70398	-2.35378	0.231169	-10.1821	2.38e-24	1.06e-22	PYY	down
RHOQ	2780.27	-0.600561	0.0589883	-10.181	2.41e-24	1.07e-22	RHOQ	no
BBX	4336.44	-0.880746	0.0865137	-10.1804	2.43e-24	1.08e-22	BBX	no
LINC01687	61.153	3.47043	0.340933	10.1792	2.46e-24	1.09e-22	LINC01687	up
C5orf34	76.1244	-0.982702	0.0965525	-10.1779	2.49e-24	1.1e-22	C5orf34	no
EID3	86.4921	-1.18447	0.116389	-10.1769	2.52e-24	1.11e-22	EID3	down
PDE1C	99.4726	-2.28826	0.224848	-10.1769	2.51e-24	1.11e-22	PDE1C	down
AL512625.3	19.3847	-1.58933	0.156204	-10.1747	2.57e-24	1.14e-22	AL512625.3	down
B3GALT6	2147.22	0.96175	0.094558	10.171	2.67e-24	1.18e-22	B3GALT6	no
ZNF30	561.094	1.29873	0.127705	10.1698	2.7e-24	1.19e-22	ZNF30	up
ZBTB4	7546.2	-0.586933	0.0577166	-10.1692	2.72e-24	1.2e-22	ZBTB4	no
PORCN	523.245	-0.697278	0.068612	-10.1626	2.91e-24	1.28e-22	PORCN	no
GPM6B	999.963	-1.22699	0.12074	-10.1622	2.92e-24	1.28e-22	GPM6B	down
TWNK	912.06	0.792714	0.0780102	10.1617	2.94e-24	1.29e-22	TWNK	no
RAB7B	320.561	-1.39316	0.137108	-10.161	2.96e-24	1.3e-22	RAB7B	down
ID4	1664.27	-1.68724	0.166064	-10.1602	2.99e-24	1.31e-22	ID4	down
AL356804.1	62.6482	1.29064	0.127062	10.1576	3.07e-24	1.34e-22	AL356804.1	up
PLEKHA1	1549.46	-0.658643	0.0648808	-10.1516	3.26e-24	1.43e-22	PLEKHA1	no
RGS10	4199.52	1.09689	0.108055	10.1511	3.27e-24	1.43e-22	RGS10	up
ARHGAP19-SLIT1	5.94123	3.40885	0.33584	10.1502	3.31e-24	1.44e-22	ARHGAP19-SLIT1	up
GPR161	1111.21	-1.29667	0.127748	-10.1503	3.31e-24	1.44e-22	GPR161	down
KANSL3	3298.72	-0.385114	0.0379513	-10.1476	3.4e-24	1.48e-22	KANSL3	no
AL596442.3	20.3904	3.81872	0.376344	10.1469	3.42e-24	1.49e-22	AL596442.3	up
MAMDC2	258.541	-1.56134	0.153886	-10.1461	3.45e-24	1.5e-22	MAMDC2	down
MEI4	2.73375	-2.30021	0.226765	-10.1436	3.54e-24	1.54e-22	MEI4	down
CHST11	607.279	-1.27481	0.125815	-10.1324	3.97e-24	1.72e-22	CHST11	down
TMEM35A	627.519	-1.97567	0.194997	-10.1318	3.99e-24	1.73e-22	TMEM35A	down
PBX1	5780.63	-0.930979	0.0918939	-10.131	4.02e-24	1.74e-22	PBX1	no
RSPH14	17.05	-1.60271	0.158248	-10.1278	4.16e-24	1.8e-22	RSPH14	down
BIRC5	415.674	1.9066	0.188365	10.1218	4.42e-24	1.91e-22	BIRC5	up
MYORG	493.602	-1.24486	0.123003	-10.1206	4.48e-24	1.93e-22	MYORG	down
EOGT	1296.78	-0.846513	0.0836736	-10.1169	4.65e-24	2e-22	EOGT	no
WARS2-AS1	591.59	0.760491	0.0751898	10.1143	4.77e-24	2.05e-22	WARS2-AS1	no
TMEM241	556.001	0.897219	0.0887401	10.1106	4.96e-24	2.13e-22	TMEM241	no
ADD1	14864.2	-0.380183	0.0376058	-10.1097	5e-24	2.15e-22	ADD1	no
RAB40A	64.8612	-1.60451	0.158729	-10.1085	5.06e-24	2.17e-22	RAB40A	down
DNASE1	1448.74	0.898809	0.0889219	10.1078	5.1e-24	2.18e-22	DNASE1	no
AP3S1	2079.64	-0.668653	0.0661587	-10.1068	5.15e-24	2.21e-22	AP3S1	no
TMEM238L	2.18954	-3.46055	0.342428	-10.1059	5.2e-24	2.22e-22	TMEM238L	down
ANGPTL3	67.897	3.1839	0.315089	10.1048	5.26e-24	2.25e-22	ANGPTL3	up
H2BC20P	458.046	1.51671	0.150125	10.103	5.36e-24	2.29e-22	H2BC20P	up
RASL11B	9.16447	-1.97474	0.195514	-10.1003	5.51e-24	2.35e-22	RASL11B	down
ACACB	1301.75	-1.10415	0.109344	-10.098	5.64e-24	2.4e-22	ACACB	down
CDH23	155.483	-1.46046	0.144674	-10.0948	5.82e-24	2.48e-22	CDH23	down
SKA3	116.104	1.66888	0.165324	10.0946	5.84e-24	2.48e-22	SKA3	up
GJA1	4436.75	-1.34529	0.133308	-10.0916	6.02e-24	2.55e-22	GJA1	down
TRPC6	142.793	-1.52761	0.151432	-10.0877	6.26e-24	2.65e-22	TRPC6	down
LINC01204	1.78491	-2.21612	0.219692	-10.0874	6.28e-24	2.66e-22	LINC01204	down
AC098828.1	2.04931	-4.38878	0.435118	-10.0864	6.34e-24	2.68e-22	AC098828.1	down
AC131009.3	20.9515	1.42249	0.141057	10.0845	6.47e-24	2.73e-22	AC131009.3	up
MPP2	440.927	-1.49947	0.148724	-10.0823	6.62e-24	2.79e-22	MPP2	down
ANGPTL1	240.799	-1.95313	0.193729	-10.0818	6.65e-24	2.8e-22	ANGPTL1	down
STIL	410.673	1.10196	0.109303	10.0818	6.65e-24	2.8e-22	STIL	up
CRABP2	1191.48	-2.00656	0.199084	-10.0789	6.85e-24	2.88e-22	CRABP2	down
TUBB4A	104.999	2.9771	0.295399	10.0782	6.9e-24	2.9e-22	TUBB4A	up
TNS1	21995.6	-1.49097	0.147947	-10.0777	6.93e-24	2.91e-22	TNS1	down
B3GNT6	593.3	4.15003	0.41191	10.0751	7.12e-24	2.99e-22	B3GNT6	up
ISYNA1	1830.49	-1.29814	0.128858	-10.0741	7.19e-24	3.01e-22	ISYNA1	down
MAP3K20	4301.36	-1.22696	0.121814	-10.0724	7.32e-24	3.06e-22	MAP3K20	down
B3GNT8	80.2984	-1.55289	0.154193	-10.0711	7.41e-24	3.1e-22	B3GNT8	down
TRAF3IP2	1526.46	-0.966261	0.095966	-10.0688	7.59e-24	3.17e-22	TRAF3IP2	no
ACOX2	416.765	-1.60832	0.159738	-10.0685	7.61e-24	3.18e-22	ACOX2	down
MAZ	1402.19	0.958275	0.0951809	10.0679	7.66e-24	3.19e-22	MAZ	no
TEAD1	2923.3	-1.0098	0.100298	-10.068	7.65e-24	3.19e-22	TEAD1	down
SYNM	12660.7	-1.79155	0.177962	-10.067	7.73e-24	3.21e-22	SYNM	down
TDRD1	1015.43	2.93548	0.291667	10.0645	7.93e-24	3.29e-22	TDRD1	up
EFEMP1	2699.11	-1.41707	0.140844	-10.0613	8.19e-24	3.4e-22	EFEMP1	down
NPR2	513.008	-1.1445	0.113786	-10.0584	8.44e-24	3.5e-22	NPR2	down
PDGFD	780.555	-1.2713	0.126426	-10.0557	8.67e-24	3.59e-22	PDGFD	down
DMD	1832.24	-1.60971	0.160086	-10.0552	8.71e-24	3.6e-22	DMD	down
TMEM101	2647.86	-0.934239	0.0929142	-10.0549	8.74e-24	3.61e-22	TMEM101	no
MAGI2-AS3	613.558	-1.3379	0.133068	-10.0542	8.8e-24	3.63e-22	MAGI2-AS3	down
SORT1	4850.63	-0.789298	0.0785072	-10.0538	8.84e-24	3.64e-22	SORT1	no
DPH2	1073.71	0.609655	0.0606678	10.0491	9.27e-24	3.82e-22	DPH2	no
LYPLAL1-DT	37.9617	-1.03171	0.102682	-10.0476	9.41e-24	3.87e-22	LYPLAL1-DT	down
CDC25C	64.0943	1.81217	0.180425	10.0439	9.77e-24	4.02e-22	CDC25C	up
ABCG4	10.3609	-1.53624	0.15305	-10.0375	1.04e-23	4.28e-22	ABCG4	down
MYOF	4675.17	-1.38357	0.13787	-10.0353	1.07e-23	4.38e-22	MYOF	down
ZDHHC9	5603.25	0.744	0.0741631	10.0319	1.1e-23	4.52e-22	ZDHHC9	no
AL732437.3	37.6781	2.23555	0.222857	10.0313	1.11e-23	4.55e-22	AL732437.3	up
RALGAPA2	8430.04	1.2157	0.121193	10.0312	1.11e-23	4.55e-22	RALGAPA2	up
ZNF219	1188.59	-1.04537	0.104234	-10.0291	1.14e-23	4.64e-22	ZNF219	down
SERPINF2	1080.66	-1.66195	0.165725	-10.0284	1.14e-23	4.67e-22	SERPINF2	down
NOX4	117.193	1.96808	0.196321	10.0248	1.19e-23	4.84e-22	NOX4	up
SYT8	48.5682	-2.69058	0.268468	-10.022	1.22e-23	4.97e-22	SYT8	down
TRIM35	844.545	-0.744332	0.0742779	-10.0209	1.23e-23	5.02e-22	TRIM35	no
PCAT14	16521.9	2.57561	0.257045	10.0201	1.24e-23	5.06e-22	PCAT14	up
CACNA1F	9.76819	-1.94113	0.193745	-10.019	1.26e-23	5.11e-22	CACNA1F	down
SLC7A11	609.287	1.59587	0.1593	10.018	1.27e-23	5.15e-22	SLC7A11	up
TROAP	146.801	1.82304	0.18198	10.0178	1.27e-23	5.16e-22	TROAP	up
ZNF157	6.54699	-1.65029	0.164742	-10.0174	1.28e-23	5.18e-22	ZNF157	down
MYH11	147988	-1.80699	0.180408	-10.0161	1.29e-23	5.24e-22	MYH11	down
FOXI2	9.70725	-2.38472	0.238148	-10.0136	1.33e-23	5.37e-22	FOXI2	down
LINC01389	15.1585	1.64233	0.164022	10.0129	1.34e-23	5.4e-22	LINC01389	up
ANKS1A	2437.86	-0.585562	0.0584914	-10.0111	1.36e-23	5.49e-22	ANKS1A	no
TWSG1	3872.6	-0.796839	0.079598	-10.0108	1.37e-23	5.51e-22	TWSG1	no
ZNF846	419.802	-0.638169	0.0637594	-10.009	1.39e-23	5.6e-22	ZNF846	no
DLGAP1-AS3	8.79535	-3.69981	0.369656	-10.0088	1.39e-23	5.61e-22	DLGAP1-AS3	down
DNMBP-AS1	78.983	1.48134	0.14801	10.0084	1.4e-23	5.62e-22	DNMBP-AS1	up
WDR97	149.035	1.91869	0.191886	9.99909	1.54e-23	6.17e-22	WDR97	up
SLC41A2	394.548	-1.31205	0.13123	-9.99815	1.55e-23	6.22e-22	SLC41A2	down
TMTC4	2902.19	1.00467	0.100512	9.99545	1.6e-23	6.39e-22	TMTC4	up
LINC00993	60.4809	6.64141	0.664939	9.988	1.72e-23	6.88e-22	LINC00993	up
PPP1R12B	13183.2	-1.3573	0.135903	-9.98727	1.73e-23	6.93e-22	PPP1R12B	down
LINC01152	2.28866	-2.37388	0.237702	-9.98678	1.74e-23	6.95e-22	LINC01152	down
SRARP	367.58	3.64218	0.364702	9.98671	1.74e-23	6.95e-22	SRARP	up
TMEM108	55.2268	-1.84259	0.184508	-9.98652	1.75e-23	6.95e-22	TMEM108	down
XKRX	35.7139	-1.58326	0.158539	-9.98657	1.75e-23	6.95e-22	XKRX	down
AC145207.9	28.1048	1.62782	0.16307	9.98233	1.82e-23	7.24e-22	AC145207.9	up
SLC34A2	576.05	-3.21822	0.322409	-9.98181	1.83e-23	7.27e-22	SLC34A2	down
DEPDC1B	90.3627	1.85522	0.185879	9.98081	1.85e-23	7.34e-22	DEPDC1B	up
VPS37C	3952.02	0.613798	0.0615178	9.97756	1.91e-23	7.58e-22	VPS37C	no
LIPC	15.8281	-1.87821	0.18826	-9.97669	1.93e-23	7.64e-22	LIPC	down
DUOXA1	241.638	-2.21353	0.221882	-9.97614	1.94e-23	7.67e-22	DUOXA1	down
KCNF1	16.5661	-2.1009	0.210618	-9.97495	1.96e-23	7.76e-22	KCNF1	down
NEK7	2532.06	-0.734097	0.0736033	-9.9737	1.99e-23	7.85e-22	NEK7	no
ITGA2	1281.06	-1.37481	0.13785	-9.97322	2e-23	7.88e-22	ITGA2	down
FAAP100	2692.32	0.675523	0.0677419	9.972	2.02e-23	7.97e-22	FAAP100	no
HOXD4	34.5769	-1.95426	0.195978	-9.97182	2.02e-23	7.97e-22	HOXD4	down
AC009063.2	13.9924	2.95305	0.296198	9.96986	2.07e-23	8.12e-22	AC009063.2	up
TMEM51	680.375	-0.891813	0.0894552	-9.96938	2.08e-23	8.16e-22	TMEM51	no
OR51E2	28106.3	2.36595	0.237372	9.9673	2.12e-23	8.32e-22	OR51E2	up
LRRC17	143.042	-1.25261	0.125674	-9.96718	2.12e-23	8.32e-22	LRRC17	down
NFE2L2	4717.19	-0.673536	0.0676076	-9.96243	2.23e-23	8.72e-22	NFE2L2	no
RNASE1	1756.06	-1.23232	0.123739	-9.95909	2.3e-23	9.01e-22	RNASE1	down
NLE1	1379.44	0.714068	0.0717207	9.95623	2.37e-23	9.26e-22	NLE1	no
BYSL	1210.97	0.654346	0.0657437	9.95299	2.45e-23	9.55e-22	BYSL	no
GPC2	69.1188	1.59308	0.16006	9.953	2.45e-23	9.55e-22	GPC2	up
B3GNTL1	312.853	0.75435	0.0758012	9.95169	2.48e-23	9.67e-22	B3GNTL1	no
C12orf73	484.74	0.7809	0.078477	9.95069	2.5e-23	9.76e-22	C12orf73	no
LRIG1	11967.6	0.903165	0.0907709	9.94994	2.52e-23	9.82e-22	LRIG1	no
NT5E	677.327	-1.32811	0.133513	-9.94747	2.59e-23	1.01e-21	NT5E	down
AC090515.4	6.0544	-1.66413	0.167294	-9.94733	2.59e-23	1.01e-21	AC090515.4	down
ZNF516	1073.22	-1.32726	0.133442	-9.94639	2.61e-23	1.01e-21	ZNF516	down
Z69733.1	23.6179	-1.60344	0.161226	-9.94527	2.64e-23	1.03e-21	Z69733.1	down
CERNA2	99.9426	-2.4966	0.2511	-9.94265	2.72e-23	1.05e-21	CERNA2	down
PDLIM5	70708.4	1.56452	0.157375	9.94136	2.75e-23	1.06e-21	PDLIM5	up
AC010719.1	203.236	1.87056	0.188169	9.94085	2.76e-23	1.07e-21	AC010719.1	up
SLC39A2	177.586	-3.86574	0.38895	-9.9389	2.82e-23	1.09e-21	SLC39A2	down
CLIP3	1419.81	-1.45504	0.146415	-9.93772	2.85e-23	1.1e-21	CLIP3	down
GNG12	4414.45	-0.70566	0.0710085	-9.93768	2.85e-23	1.1e-21	GNG12	no
AL135999.1	23.9443	1.76255	0.177371	9.93711	2.87e-23	1.11e-21	AL135999.1	up
ACSL4	1196.68	-1.13603	0.114359	-9.93392	2.96e-23	1.14e-21	ACSL4	down
PVT1	737.215	1.322	0.133087	9.93336	2.98e-23	1.15e-21	PVT1	up
CEACAM21	36.3456	-1.68091	0.169279	-9.92981	3.09e-23	1.19e-21	CEACAM21	down
SIM1	19.1393	-5.91761	0.596016	-9.9286	3.13e-23	1.2e-21	SIM1	down
MRPL20-DT	128.313	1.04536	0.10533	9.92464	3.25e-23	1.25e-21	MRPL20-DT	up
ACSF2	882.364	-1.48983	0.150199	-9.91904	3.44e-23	1.32e-21	ACSF2	down
PPP2R2B	74.855	-1.54606	0.155903	-9.91686	3.52e-23	1.35e-21	PPP2R2B	down
GNG13	38.1549	2.69174	0.271446	9.91631	3.54e-23	1.35e-21	GNG13	up
MPP6	1030.37	1.16342	0.11733	9.91581	3.55e-23	1.36e-21	MPP6	up
GPR89A	257.809	0.724997	0.0731223	9.91485	3.59e-23	1.37e-21	GPR89A	no
DCC	22.0675	-2.57289	0.259515	-9.91422	3.61e-23	1.38e-21	DCC	down
C14orf132	976.487	-1.34582	0.135762	-9.91309	3.65e-23	1.39e-21	C14orf132	down
ASPN	693.099	1.77693	0.179262	9.91248	3.67e-23	1.4e-21	ASPN	up
KCNIP3	273.476	-1.29509	0.130654	-9.91235	3.68e-23	1.4e-21	KCNIP3	down
PARP3	850.233	-0.837905	0.084564	-9.90853	3.82e-23	1.45e-21	PARP3	no
DUX4L50	35.4159	-1.60563	0.16213	-9.90333	4.03e-23	1.53e-21	DUX4L50	down
CRNDE	1187.5	1.08723	0.109796	9.90235	4.07e-23	1.54e-21	CRNDE	up
HAGHL	363.36	1.95842	0.197796	9.90122	4.11e-23	1.56e-21	HAGHL	up
RCC1	1911.43	0.895718	0.0904652	9.90124	4.11e-23	1.56e-21	RCC1	no
SLC26A1	247.138	1.0465	0.105701	9.90056	4.14e-23	1.56e-21	SLC26A1	up
AJUBA	800.972	-1.19907	0.121263	-9.88816	4.69e-23	1.77e-21	AJUBA	down
RNASEL	689.281	-0.680192	0.0687976	-9.88686	4.75e-23	1.79e-21	RNASEL	no
AC073648.6	6.59793	-3.12951	0.316763	-9.87964	5.1e-23	1.92e-21	AC073648.6	down
AC023024.2	25.5639	1.3331	0.134938	9.8794	5.11e-23	1.92e-21	AC023024.2	up
LINC02817	3.19333	-2.20547	0.223245	-9.87915	5.13e-23	1.93e-21	LINC02817	down
CENPM	233.624	1.62093	0.16409	9.87826	5.17e-23	1.94e-21	CENPM	up
SLC16A4	186.322	-1.11123	0.112592	-9.8695	5.64e-23	2.12e-21	SLC16A4	down
POU3F1	16.6887	-1.87364	0.189848	-9.86916	5.66e-23	2.12e-21	POU3F1	down
CDH8	24.3979	-2.37864	0.241113	-9.86528	5.89e-23	2.21e-21	CDH8	down
AC096540.1	38.0379	1.19403	0.121069	9.86244	6.06e-23	2.27e-21	AC096540.1	up
CYP26B1	185.329	-1.92754	0.195458	-9.86168	6.1e-23	2.28e-21	CYP26B1	down
RSU1	2628	-0.652374	0.0661607	-9.86044	6.18e-23	2.31e-21	RSU1	no
ADRA1A	257.562	-2.08016	0.210991	-9.85901	6.27e-23	2.34e-21	ADRA1A	down
FNBP1	4607.18	-0.728142	0.0738956	-9.85366	6.61e-23	2.46e-21	FNBP1	no
DUS1L	9874.4	1.03038	0.104574	9.85316	6.64e-23	2.47e-21	DUS1L	up
ACTBP2	21.5244	-1.09743	0.111465	-9.84547	7.17e-23	2.67e-21	ACTBP2	down
BIK	1491.28	1.09343	0.111104	9.8415	7.46e-23	2.77e-21	BIK	up
OTX1	441.424	2.04195	0.2075	9.84069	7.52e-23	2.79e-21	OTX1	up
LPAR1	844.476	-1.20192	0.122146	-9.84004	7.57e-23	2.81e-21	LPAR1	down
TRMT1L	940.3	-0.523924	0.0532535	-9.8383	7.7e-23	2.86e-21	TRMT1L	no
LINC00930	289.743	2.08372	0.211837	9.83647	7.84e-23	2.91e-21	LINC00930	up
TMEM139	16.6055	-1.53667	0.156242	-9.83518	7.94e-23	2.94e-21	TMEM139	down
LINC00634	11.4329	2.00499	0.203896	9.83341	8.08e-23	2.99e-21	LINC00634	up
NOX1	126.446	-1.67924	0.17078	-9.8328	8.13e-23	3e-21	NOX1	down
EPS8	1430.44	-0.93572	0.0951766	-9.83141	8.25e-23	3.04e-21	EPS8	no
OPCML	15.4819	-2.63267	0.267978	-9.82421	8.86e-23	3.27e-21	OPCML	down
PTPN14	2403.47	-0.943886	0.0960963	-9.8223	9.03e-23	3.33e-21	PTPN14	no
WBP4	782.593	-0.572043	0.0582606	-9.81869	9.35e-23	3.44e-21	WBP4	no
LIME1	78.781	1.47604	0.150376	9.81565	9.64e-23	3.55e-21	LIME1	up
AC021818.1	7.29916	2.6048	0.265402	9.81454	9.75e-23	3.58e-21	AC021818.1	up
AC024909.1	14.415	-1.48935	0.151751	-9.81442	9.76e-23	3.58e-21	AC024909.1	down
SCARB1	3142.14	0.72698	0.0740853	9.81275	9.92e-23	3.64e-21	SCARB1	no
AC012467.1	24.8939	1.80312	0.183757	9.81255	9.94e-23	3.64e-21	AC012467.1	up
QRICH2	379.242	1.0173	0.103674	9.81256	9.94e-23	3.64e-21	QRICH2	up
F2RL2	82.4388	2.03758	0.207765	9.80711	1.05e-22	3.84e-21	F2RL2	up
CYP4B1	739.031	-2.21656	0.226029	-9.80654	1.06e-22	3.86e-21	CYP4B1	down
PIP5K1C	4095.09	-0.58592	0.0597623	-9.80416	1.08e-22	3.94e-21	PIP5K1C	no
DUOX2	322.848	-2.63381	0.26871	-9.80166	1.11e-22	4.04e-21	DUOX2	down
NYAP1	65.7554	-1.34329	0.137059	-9.80078	1.12e-22	4.07e-21	NYAP1	down
PNPLA1	2.74822	-1.68921	0.172434	-9.79628	1.17e-22	4.25e-21	PNPLA1	down
AC084277.1	1.77087	-2.51507	0.256764	-9.79525	1.18e-22	4.29e-21	AC084277.1	down
CCNYL2	1.12077	-3.7426	0.382097	-9.79489	1.18e-22	4.3e-21	CCNYL2	down
AP001994.2	6.27978	-2.31938	0.236825	-9.79362	1.2e-22	4.35e-21	AP001994.2	down
ADSL	269.737	0.618755	0.063232	9.78547	1.3e-22	4.72e-21	ADSL	no
PHF19	983.857	-0.731603	0.0747788	-9.78356	1.32e-22	4.8e-21	PHF19	no
HPX	161.4	1.4267	0.145849	9.78206	1.34e-22	4.87e-21	HPX	up
LHFPL1	15.5835	-1.53792	0.157228	-9.78149	1.35e-22	4.89e-21	LHFPL1	down
PEX14	1609.58	-0.602792	0.0616367	-9.77975	1.38e-22	4.97e-21	PEX14	no
AC104237.2	2.22446	-2.85433	0.292056	-9.77322	1.47e-22	5.29e-21	AC104237.2	down
AL161668.3	5.26979	-2.07299	0.212109	-9.77322	1.47e-22	5.29e-21	AL161668.3	down
HOXB3	282.012	-1.71961	0.176039	-9.76833	1.54e-22	5.55e-21	HOXB3	down
NETO1	45.8303	4.05691	0.415329	9.76794	1.55e-22	5.57e-21	NETO1	up
CAPN10-DT	145.916	1.23009	0.125945	9.76692	1.56e-22	5.62e-21	CAPN10-DT	up
CACHD1	670.178	-1.33731	0.13693	-9.76636	1.57e-22	5.64e-21	CACHD1	down
LRRC3B	4.81071	-2.20884	0.226185	-9.7656	1.58e-22	5.68e-21	LRRC3B	down
CDCA8	213.547	1.22846	0.1258	9.7652	1.59e-22	5.7e-21	CDCA8	up
SPON1	1241.82	-1.62929	0.166866	-9.76403	1.61e-22	5.76e-21	SPON1	down
RPL22L1	2562.99	1.29055	0.132188	9.76302	1.62e-22	5.81e-21	RPL22L1	up
TMEM213	23.424	-2.99137	0.30646	-9.76105	1.65e-22	5.92e-21	TMEM213	down
HID1	14891.1	0.77379	0.0792898	9.75902	1.69e-22	6.03e-21	HID1	no
KRT222	15.0924	-2.42294	0.248275	-9.75908	1.69e-22	6.03e-21	KRT222	down
CAVIN2	1617.29	-1.36616	0.14	-9.75829	1.7e-22	6.07e-21	CAVIN2	down
BHMT2	367.126	-1.45374	0.148978	-9.75809	1.7e-22	6.07e-21	BHMT2	down
CCDC54	3.20429	-1.66246	0.170393	-9.75659	1.73e-22	6.16e-21	CCDC54	down
SLAMF6P1	1.99364	-6.14734	0.630164	-9.75513	1.75e-22	6.24e-21	SLAMF6P1	down
SLC43A1	4898.04	1.46827	0.150524	9.75445	1.77e-22	6.28e-21	SLC43A1	up
TACC1	7121.82	-1.06641	0.109348	-9.7525	1.8e-22	6.4e-21	TACC1	down
KY	99.816	-2.28677	0.234516	-9.75099	1.83e-22	6.49e-21	KY	down
H1-4	114.037	2.16508	0.222145	9.74628	1.91e-22	6.79e-21	H1-4	up
FZD8	880.234	1.4793	0.151784	9.74606	1.92e-22	6.8e-21	FZD8	up
NHS	310.046	-1.33908	0.137419	-9.74456	1.95e-22	6.89e-21	NHS	down
MGAT4C	15.1017	-2.20831	0.22665	-9.74322	1.97e-22	6.98e-21	MGAT4C	down
AC004066.1	32.6512	1.55173	0.159333	9.73889	2.06e-22	7.27e-21	AC004066.1	up
ASTL	8.98296	-2.34304	0.240728	-9.73312	2.18e-22	7.69e-21	ASTL	down
AL691447.2	20.9875	-1.28775	0.132308	-9.73299	2.18e-22	7.7e-21	AL691447.2	down
AL022324.3	11.9196	3.14277	0.322912	9.73259	2.19e-22	7.72e-21	AL022324.3	up
NAV2	712.213	-1.42625	0.146581	-9.73018	2.24e-22	7.9e-21	NAV2	down
MOGS	5261.43	0.586415	0.0602897	9.72663	2.32e-22	8.17e-21	MOGS	no
FAM83H	5386.23	0.90083	0.0926483	9.72311	2.4e-22	8.45e-21	FAM83H	no
SLCO1A2	365.524	3.14564	0.32364	9.71956	2.49e-22	8.74e-21	SLCO1A2	up
NKX2-2	19.2836	4.09465	0.421295	9.71921	2.5e-22	8.77e-21	NKX2-2	up
C3orf70	677.47	-1.3961	0.143658	-9.71819	2.52e-22	8.85e-21	C3orf70	down
CASC8	36.0696	2.19799	0.226236	9.71546	2.59e-22	9.08e-21	CASC8	up
TMEM252	101.441	-2.19044	0.225475	-9.71478	2.61e-22	9.13e-21	TMEM252	down
GNB5	932.954	-0.682067	0.0702211	-9.71312	2.65e-22	9.27e-21	GNB5	no
EIF2AK1	13235.7	0.565949	0.0582736	9.71193	2.68e-22	9.37e-21	EIF2AK1	no
PGM5	7690.1	-1.80758	0.186124	-9.71171	2.69e-22	9.38e-21	PGM5	down
TESMIN	627.992	0.855756	0.088116	9.71171	2.69e-22	9.38e-21	TESMIN	no
ZFAND5	7559.16	-0.689052	0.0709522	-9.7115	2.69e-22	9.39e-21	ZFAND5	no
GDF15	21745.5	1.83631	0.18909	9.71134	2.7e-22	9.4e-21	GDF15	up
LINC02762	104.227	-1.44173	0.148483	-9.70973	2.74e-22	9.54e-21	LINC02762	down
BX324167.2	18.4888	2.23077	0.229779	9.70833	2.78e-22	9.66e-21	BX324167.2	up
TOR4A	205.251	-1.22315	0.125997	-9.7078	2.79e-22	9.7e-21	TOR4A	down
SLCO1B3	68.923	4.05323	0.417558	9.707	2.82e-22	9.77e-21	SLCO1B3	up
AMDHD2	700.685	0.830414	0.085557	9.70597	2.84e-22	9.86e-21	AMDHD2	no
SORBS1	8108.73	-1.58827	0.163655	-9.70498	2.87e-22	9.95e-21	SORBS1	down
SOX15	178.9	-1.44004	0.148385	-9.70475	2.88e-22	9.96e-21	SOX15	down
LPP	15584.7	-0.986461	0.101658	-9.70371	2.91e-22	1.01e-20	LPP	no
EDNRA	1894.98	-1.36539	0.140749	-9.70089	2.99e-22	1.03e-20	EDNRA	down
AMELX	2.4001	-2.46323	0.253936	-9.70021	3.01e-22	1.04e-20	AMELX	down
PPP1R26-AS1	344.607	0.832514	0.0858302	9.69955	3.03e-22	1.04e-20	PPP1R26-AS1	no
NXPE3	802.476	-0.940944	0.0970143	-9.69902	3.04e-22	1.05e-20	NXPE3	no
AC100803.4	30.7908	2.3441	0.241752	9.6963	3.13e-22	1.08e-20	AC100803.4	up
GPLD1	172.927	-1.13394	0.116978	-9.69357	3.21e-22	1.1e-20	GPLD1	down
PRRG4	1211.61	-1.19053	0.122829	-9.69256	3.24e-22	1.11e-20	PRRG4	down
CACFD1	3504.23	0.840586	0.0867329	9.69166	3.27e-22	1.12e-20	CACFD1	no
ADM2	2000.28	1.23721	0.127663	9.69129	3.28e-22	1.13e-20	ADM2	up
VWA5A	949.047	-1.27846	0.131919	-9.69124	3.29e-22	1.13e-20	VWA5A	down
ALDH1L1-AS2	15.1175	-2.00155	0.206634	-9.68643	3.44e-22	1.18e-20	ALDH1L1-AS2	down
ADAMTS9-AS1	241.953	-2.0909	0.21591	-9.68412	3.52e-22	1.21e-20	ADAMTS9-AS1	down
CWF19L2	784.195	-0.554253	0.0572368	-9.68351	3.54e-22	1.21e-20	CWF19L2	no
CDS2	3864.75	-0.497668	0.0514142	-9.67957	3.68e-22	1.26e-20	CDS2	no
MYOCD	962.537	-1.77324	0.183226	-9.67786	3.74e-22	1.28e-20	MYOCD	down
NOP16	693.701	0.945057	0.0976536	9.67764	3.75e-22	1.28e-20	NOP16	no
AC139783.2	7.77582	4.32523	0.446944	9.67736	3.76e-22	1.28e-20	AC139783.2	up
RANBP17	301.915	0.746036	0.0771056	9.67551	3.83e-22	1.31e-20	RANBP17	no
FAM47E	219.657	0.915621	0.094665	9.67222	3.96e-22	1.35e-20	FAM47E	no
SLC7A5	1002.85	-1.75819	0.181785	-9.67181	3.97e-22	1.35e-20	SLC7A5	down
TENT5A	1388.2	-1.29324	0.133713	-9.67174	3.98e-22	1.35e-20	TENT5A	down
MTMR8	38.6562	-1.33993	0.138607	-9.66712	4.16e-22	1.41e-20	MTMR8	down
MAP1LC3B	3328.8	-0.575211	0.0595091	-9.66594	4.21e-22	1.43e-20	MAP1LC3B	no
CHIC1	735.945	-0.567248	0.058697	-9.664	4.29e-22	1.45e-20	CHIC1	no
FAM201A	310.22	0.996415	0.103111	9.66348	4.31e-22	1.46e-20	FAM201A	no
AL121821.2	34.8616	-1.48238	0.153408	-9.66302	4.33e-22	1.46e-20	AL121821.2	down
LRTOMT	719.953	0.665391	0.0688678	9.66185	4.38e-22	1.48e-20	LRTOMT	no
AP001636.3	1032.82	1.66866	0.17272	9.66107	4.41e-22	1.49e-20	AP001636.3	up
TRIM6	107.532	-1.25426	0.129841	-9.65996	4.46e-22	1.51e-20	TRIM6	down
FLNA	100548	-1.53846	0.159279	-9.65892	4.51e-22	1.52e-20	FLNA	down
AQP5	42.0738	-2.25766	0.233905	-9.65205	4.82e-22	1.62e-20	AQP5	down
ENTPD3	232.55	-1.39204	0.144239	-9.65094	4.87e-22	1.64e-20	ENTPD3	down
FAM111A	4632.64	0.897439	0.0929904	9.65088	4.87e-22	1.64e-20	FAM111A	no
PARD6G	565.757	-0.688733	0.0713751	-9.64949	4.94e-22	1.66e-20	PARD6G	no
AL354824.2	2.4358	-2.76502	0.28665	-9.64598	5.11e-22	1.72e-20	AL354824.2	down
PET100	114.988	1.3197	0.136819	9.64563	5.13e-22	1.72e-20	PET100	up
AC078864.1	304.081	1.45873	0.151279	9.64265	5.28e-22	1.77e-20	AC078864.1	up
MXRA7P1	22.3418	-1.35252	0.140273	-9.64208	5.31e-22	1.78e-20	MXRA7P1	down
HOXD13	395.525	-1.83486	0.190339	-9.63995	5.42e-22	1.81e-20	HOXD13	down
KCNMA1	3504.84	-1.37907	0.143071	-9.63905	5.47e-22	1.83e-20	KCNMA1	down
SEPTIN7	5665.38	-0.517165	0.0536554	-9.63864	5.49e-22	1.83e-20	SEPTIN7	no
TMIE	18.8148	-1.57239	0.163146	-9.63792	5.53e-22	1.85e-20	TMIE	down
PFKFB3	1917.04	-1.11167	0.115375	-9.63526	5.67e-22	1.89e-20	PFKFB3	down
AL589182.1	143.821	2.58156	0.267946	9.63461	5.71e-22	1.9e-20	AL589182.1	up
IL1RL1	75.5327	-2.24207	0.23272	-9.63419	5.73e-22	1.91e-20	IL1RL1	down
AIFM2	627.786	-0.902793	0.093747	-9.63011	5.97e-22	1.98e-20	AIFM2	no
CCDC89	42.8464	-1.33515	0.13865	-9.62958	6e-22	1.99e-20	CCDC89	down
SPOCK3	2029	-1.6694	0.173372	-9.62898	6.03e-22	2e-20	SPOCK3	down
RGS22	82.9429	-1.35297	0.140522	-9.62816	6.08e-22	2.02e-20	RGS22	down
AC106028.3	62.8539	1.20015	0.124668	9.62685	6.16e-22	2.04e-20	AC106028.3	up
SAPCD1	17.4593	2.07544	0.215718	9.62108	6.51e-22	2.16e-20	SAPCD1	up
LINC00398	6.29623	-1.32633	0.137865	-9.62054	6.55e-22	2.17e-20	LINC00398	down
MBNL1	6198.29	-0.661347	0.0687593	-9.61828	6.69e-22	2.21e-20	MBNL1	no
LINC02478	4.46052	-2.74554	0.285466	-9.61772	6.73e-22	2.22e-20	LINC02478	down
FOLR1	69.3669	-2.3402	0.243445	-9.61286	7.06e-22	2.33e-20	FOLR1	down
CRAT37	1.70377	-5.05728	0.526224	-9.61051	7.22e-22	2.38e-20	CRAT37	down
AC009902.3	43.331	2.22149	0.231222	9.60762	7.42e-22	2.45e-20	AC009902.3	up
NIPAL4	54.6173	-1.884	0.196103	-9.6072	7.45e-22	2.46e-20	NIPAL4	down
RNVU1-27	11.094	2.15614	0.224434	9.60703	7.47e-22	2.46e-20	RNVU1-27	up
ZMYND19	1338.97	0.771741	0.0803524	9.60446	7.66e-22	2.52e-20	ZMYND19	no
ACTRT3	57.2898	-0.870668	0.0906736	-9.60222	7.82e-22	2.57e-20	ACTRT3	no
SYT10	23.0867	-2.39466	0.249438	-9.60022	7.98e-22	2.62e-20	SYT10	down
HCAR3	17.7965	-2.29011	0.238665	-9.59548	8.35e-22	2.74e-20	HCAR3	down
GNL2	3101.99	0.51103	0.0532659	9.59395	8.48e-22	2.78e-20	GNL2	no
ANKZF1	2323.54	0.750008	0.0781891	9.59223	8.62e-22	2.82e-20	ANKZF1	no
KLHL13	401.935	-1.11792	0.11655	-9.59179	8.66e-22	2.83e-20	KLHL13	down
CCER2	38.1251	1.96983	0.205449	9.58791	8.99e-22	2.94e-20	CCER2	up
PGR	545.144	-1.56426	0.163157	-9.58749	9.03e-22	2.95e-20	PGR	down
ITM2B	29894.3	-0.670974	0.0699858	-9.58729	9.04e-22	2.95e-20	ITM2B	no
PCED1A	2523.07	0.829928	0.0865729	9.58647	9.12e-22	2.97e-20	PCED1A	no
IQGAP3	234.781	1.78841	0.186624	9.58295	9.43e-22	3.07e-20	IQGAP3	up
SEC14L6	63.5392	-1.62542	0.169617	-9.58284	9.44e-22	3.07e-20	SEC14L6	down
LINC00643	7.33821	-2.71933	0.28381	-9.58151	9.56e-22	3.11e-20	LINC00643	down
MHENCR	424.428	1.27388	0.132955	9.58129	9.58e-22	3.12e-20	MHENCR	up
GMDS	3478.29	1.17639	0.122816	9.57848	9.85e-22	3.2e-20	GMDS	up
TMEM86A	561.537	0.828443	0.0865074	9.57655	1e-21	3.26e-20	TMEM86A	no
REPIN1	7209.53	0.58732	0.0613395	9.57491	1.02e-21	3.31e-20	REPIN1	no
AC147067.2	60.1182	2.47182	0.258206	9.57303	1.04e-21	3.36e-20	AC147067.2	up
ADAT2	368.72	0.918306	0.0959528	9.57039	1.07e-21	3.45e-20	ADAT2	no
OR52R1	7.99349	3.18303	0.332604	9.57004	1.07e-21	3.46e-20	OR52R1	up
JAM3	901.323	-1.45968	0.152553	-9.56836	1.09e-21	3.51e-20	JAM3	down
AC100826.1	226.392	2.78379	0.290947	9.56803	1.09e-21	3.52e-20	AC100826.1	up
OGFRL1	1181.85	-0.78343	0.0818867	-9.56724	1.1e-21	3.54e-20	OGFRL1	no
LINC01399	14.6802	1.78413	0.186533	9.56467	1.13e-21	3.63e-20	LINC01399	up
SBDS	3756.32	-0.471625	0.0493186	-9.56283	1.15e-21	3.69e-20	SBDS	no
TINAGL1	1763.48	-1.22347	0.127966	-9.56094	1.17e-21	3.75e-20	TINAGL1	down
TMEM169	22.3124	-1.29694	0.13565	-9.56094	1.17e-21	3.75e-20	TMEM169	down
FAM221A	588.296	1.11264	0.116376	9.56079	1.17e-21	3.76e-20	FAM221A	up
SMYD4	698.963	-0.50372	0.0526893	-9.56019	1.18e-21	3.78e-20	SMYD4	no
CABP4	337.853	1.15782	0.121137	9.55798	1.2e-21	3.85e-20	CABP4	up
LMOD1	8392.84	-1.60633	0.168094	-9.55614	1.22e-21	3.92e-20	LMOD1	down
TCN2	934.401	-0.999429	0.104606	-9.55419	1.25e-21	3.99e-20	TCN2	no
AC084018.1	120.22	1.52709	0.159838	9.55399	1.25e-21	4e-20	AC084018.1	up
AC138904.1	27.3506	1.75551	0.183801	9.55114	1.28e-21	4.1e-20	AC138904.1	up
RND2	208.252	-1.51729	0.158869	-9.55055	1.29e-21	4.12e-20	RND2	down
BTN2A1	1136.59	-0.522234	0.0546963	-9.54787	1.32e-21	4.23e-20	BTN2A1	no
PNMA1	3017.01	-1.06244	0.111281	-9.5474	1.33e-21	4.24e-20	PNMA1	down
AC005165.1	218.6	-2.37863	0.249147	-9.54708	1.33e-21	4.25e-20	AC005165.1	down
SMARCA4	9369.14	0.491322	0.051479	9.54414	1.37e-21	4.37e-20	SMARCA4	no
EIF4E3	1591.34	-0.701317	0.0734896	-9.54307	1.39e-21	4.41e-20	EIF4E3	no
PRDM5	263.042	-1.04485	0.109497	-9.54223	1.4e-21	4.45e-20	PRDM5	down
FBXL22	226.973	-1.08006	0.113199	-9.54127	1.41e-21	4.49e-20	FBXL22	down
SLC31A2	11.2937	-1.46529	0.153588	-9.54035	1.42e-21	4.52e-20	SLC31A2	down
JPT2	13342.8	0.571741	0.0599369	9.53904	1.44e-21	4.58e-20	JPT2	no
ABCD3	2608.01	-0.601223	0.0630412	-9.53697	1.47e-21	4.66e-20	ABCD3	no
AC124944.2	101.72	1.21858	0.12782	9.53352	1.52e-21	4.82e-20	AC124944.2	up
NNT	2212.28	-0.86208	0.0904307	-9.53304	1.53e-21	4.84e-20	NNT	no
RBPMS2	795.704	-1.25159	0.131316	-9.53111	1.56e-21	4.92e-20	RBPMS2	down
AL021395.1	22.4743	3.96512	0.416087	9.52955	1.58e-21	4.99e-20	AL021395.1	up
CLCA2	166.226	-3.03449	0.318431	-9.5295	1.58e-21	4.99e-20	CLCA2	down
POLD2	7593.52	0.766361	0.0804364	9.52754	1.61e-21	5.08e-20	POLD2	no
LINC02351	4.2299	-2.27937	0.239278	-9.52605	1.63e-21	5.15e-20	LINC02351	down
AP005205.2	7.6111	2.43484	0.255625	9.52506	1.65e-21	5.2e-20	AP005205.2	up
DPF1	32.3061	1.11631	0.117233	9.52214	1.7e-21	5.34e-20	DPF1	up
CYP4F3	32.8668	-1.93612	0.203362	-9.52058	1.72e-21	5.42e-20	CYP4F3	down
AL121612.2	26.8822	2.66088	0.279596	9.51687	1.78e-21	5.61e-20	AL121612.2	up
METTL24	57.4262	-1.57286	0.165272	-9.5168	1.79e-21	5.61e-20	METTL24	down
RPL26	2387.1	1.31601	0.138291	9.51623	1.8e-21	5.64e-20	RPL26	up
SLC6A21P	9.13234	2.27677	0.239304	9.51413	1.83e-21	5.75e-20	SLC6A21P	up
IGSF1	130.444	-2.27054	0.238676	-9.51306	1.85e-21	5.8e-20	IGSF1	down
AC016737.1	31.5777	1.49557	0.157218	9.51271	1.86e-21	5.82e-20	AC016737.1	up
RSAD1	2299.56	0.512337	0.0538666	9.51122	1.88e-21	5.9e-20	RSAD1	no
P2RX5	71.2011	1.7009	0.178837	9.51088	1.89e-21	5.91e-20	P2RX5	up
COL21A1	207.411	-1.34122	0.141029	-9.51026	1.9e-21	5.94e-20	COL21A1	down
GRAMD1A	5448.33	0.65862	0.0692553	9.51004	1.91e-21	5.95e-20	GRAMD1A	no
LINC00301	2.10153	-3.6033	0.378954	-9.50853	1.93e-21	6.03e-20	LINC00301	down
AC011472.1	32.0083	-1.06908	0.112449	-9.50725	1.96e-21	6.1e-20	AC011472.1	down
EDRF1	1184.45	0.911427	0.0958781	9.5061	1.98e-21	6.17e-20	EDRF1	no
SLC12A9-AS1	45.9596	1.27065	0.133772	9.49858	2.13e-21	6.62e-20	SLC12A9-AS1	up
CYP2T1P	116.823	-1.28028	0.134813	-9.49667	2.17e-21	6.74e-20	CYP2T1P	down
AC106881.1	36.1533	-1.47562	0.155411	-9.49496	2.2e-21	6.85e-20	AC106881.1	down
PEX2	3043.85	-0.593652	0.062528	-9.49418	2.22e-21	6.89e-20	PEX2	no
AC007637.1	13.5139	-1.71723	0.180991	-9.48796	2.36e-21	7.31e-20	AC007637.1	down
RBIS	525.769	1.03667	0.109271	9.48714	2.37e-21	7.36e-20	RBIS	up
MXD3	282.402	1.40138	0.147731	9.48603	2.4e-21	7.44e-20	MXD3	up
EIF4EBP3	53.024	1.2747	0.134382	9.48563	2.41e-21	7.45e-20	EIF4EBP3	up
FBXL7	998.786	-0.823855	0.0868524	-9.48568	2.41e-21	7.45e-20	FBXL7	no
CCNJL	94.7777	-1.36295	0.14369	-9.48537	2.42e-21	7.47e-20	CCNJL	down
EIF3B	13159.8	0.66856	0.0704984	9.48333	2.46e-21	7.61e-20	EIF3B	no
AC010326.3	210.632	0.647027	0.0682328	9.48264	2.48e-21	7.65e-20	AC010326.3	no
CENPA	70.6366	1.89731	0.200094	9.48213	2.49e-21	7.68e-20	CENPA	up
ZCCHC24	2245.52	-0.872073	0.0919785	-9.48126	2.51e-21	7.74e-20	ZCCHC24	no
AL163051.1	61.2531	1.23265	0.130016	9.48071	2.53e-21	7.78e-20	AL163051.1	up
MYO19	1073.36	0.657942	0.0694061	9.4796	2.55e-21	7.85e-20	MYO19	no
NKX6-1	46.2623	3.55367	0.37492	9.47847	2.58e-21	7.93e-20	NKX6-1	up
ACTN1	15679.7	-0.90953	0.0959658	-9.47765	2.6e-21	7.99e-20	ACTN1	no
RRP12	2331.25	0.723488	0.0763433	9.47678	2.62e-21	8.05e-20	RRP12	no
TRIM27	4695.42	0.48888	0.0516117	9.47228	2.74e-21	8.4e-20	TRIM27	no
TRIB3	2032.22	0.974419	0.102872	9.47214	2.74e-21	8.4e-20	TRIB3	no
FOXB2	38.0464	4.1171	0.434701	9.47112	2.77e-21	8.48e-20	FOXB2	up
CDO1	814.189	-2.32013	0.24499	-9.4703	2.79e-21	8.54e-20	CDO1	down
LINC01410	25.0132	-1.5957	0.168511	-9.46943	2.81e-21	8.6e-20	LINC01410	down
PABPN1	632.212	1.15213	0.121675	9.46891	2.83e-21	8.64e-20	PABPN1	up
CSRNP3	216.416	-1.51596	0.160111	-9.46821	2.85e-21	8.69e-20	CSRNP3	down
HCFC2	931.347	-0.627066	0.06623	-9.46801	2.85e-21	8.7e-20	HCFC2	no
AC107959.1	91.5198	-1.14478	0.120924	-9.46697	2.88e-21	8.78e-20	AC107959.1	down
VWCE	62.4787	-1.45097	0.153283	-9.466	2.91e-21	8.86e-20	VWCE	down
TMEM100	283.314	-1.89094	0.199766	-9.46576	2.91e-21	8.87e-20	TMEM100	down
TTC23	808.029	-0.586848	0.0619993	-9.46541	2.92e-21	8.89e-20	TTC23	no
KCNMB1	2231.68	-1.58426	0.167403	-9.46376	2.97e-21	9.03e-20	KCNMB1	down
DISP3	133.029	1.45599	0.153867	9.46267	3e-21	9.12e-20	DISP3	up
CDCA5	298.674	1.4409	0.152305	9.4606	3.06e-21	9.29e-20	CDCA5	up
AC090825.1	55.4506	-1.50287	0.158868	-9.45986	3.08e-21	9.35e-20	AC090825.1	down
AVPI1	676.764	-1.1999	0.126888	-9.4564	3.19e-21	9.66e-20	AVPI1	down
POPDC2	564.963	-1.41113	0.149229	-9.45613	3.2e-21	9.68e-20	POPDC2	down
CYSRT1	182.908	1.41906	0.150071	9.45589	3.2e-21	9.69e-20	CYSRT1	up
CYTH2	4237.63	0.608426	0.0643462	9.45551	3.21e-21	9.72e-20	CYTH2	no
MCOLN2	243.576	1.65927	0.175485	9.45536	3.22e-21	9.73e-20	MCOLN2	up
TAF1D	2246.59	0.705986	0.0746797	9.45352	3.28e-21	9.89e-20	TAF1D	no
KCTD9	1219.03	-0.737817	0.0780513	-9.45298	3.29e-21	9.93e-20	KCTD9	no
TTC28	1090.87	-0.979495	0.103643	-9.45062	3.37e-21	1.02e-19	TTC28	no
RNY3P8	218.945	1.69299	0.179148	9.45021	3.38e-21	1.02e-19	RNY3P8	up
ULBP1	23.3427	2.1217	0.224546	9.44886	3.43e-21	1.03e-19	ULBP1	up
PLCZ1	1.13389	-3.86954	0.409536	-9.4486	3.43e-21	1.03e-19	PLCZ1	down
DTNA	1080.99	-1.37079	0.145088	-9.44801	3.45e-21	1.04e-19	DTNA	down
AC019069.1	68.7828	1.28134	0.135632	9.44712	3.48e-21	1.05e-19	AC019069.1	up
NEFM	69.4324	-2.93032	0.310212	-9.44618	3.51e-21	1.05e-19	NEFM	down
AL157756.1	93.2471	1.57262	0.16652	9.44401	3.59e-21	1.08e-19	AL157756.1	up
FAM136A	2275.15	0.554065	0.0586743	9.44306	3.62e-21	1.08e-19	FAM136A	no
OGT	9330.26	0.904387	0.0957766	9.44267	3.63e-21	1.09e-19	OGT	no
STARD8	515.01	-1.27307	0.134829	-9.44211	3.65e-21	1.09e-19	STARD8	down
BX470102.2	24.9781	-1.31114	0.138898	-9.43958	3.74e-21	1.12e-19	BX470102.2	down
VARS1	4625.22	0.622744	0.0659722	9.43949	3.75e-21	1.12e-19	VARS1	no
RAVER2	1371.2	-0.582896	0.0617726	-9.43616	3.87e-21	1.15e-19	RAVER2	no
OR5AU1	1.29821	-4.48194	0.475308	-9.42954	4.12e-21	1.23e-19	OR5AU1	down
ATG9B	128.198	1.40694	0.14922	9.42864	4.15e-21	1.24e-19	ATG9B	up
KCNH5	8.92165	-3.28455	0.348574	-9.42281	4.39e-21	1.31e-19	KCNH5	down
LONRF3	78.9729	-1.43855	0.15267	-9.42264	4.4e-21	1.31e-19	LONRF3	down
MEIS2	1846.38	-1.40415	0.149023	-9.42238	4.41e-21	1.31e-19	MEIS2	down
RAC3	1586.94	1.27642	0.135572	9.41506	4.73e-21	1.4e-19	RAC3	up
DUOXA2	30.0214	-2.78212	0.295511	-9.41462	4.75e-21	1.41e-19	DUOXA2	down
CAPN6	440.964	-2.22522	0.236409	-9.4126	4.84e-21	1.44e-19	CAPN6	down
ENTPD6	8963.03	0.651657	0.0692372	9.41195	4.87e-21	1.44e-19	ENTPD6	no
IL21-AS1	6.249	-2.52726	0.268533	-9.41136	4.9e-21	1.45e-19	IL21-AS1	down
KIF18B	97.3824	1.93755	0.205914	9.40952	4.98e-21	1.48e-19	KIF18B	up
AC024060.2	205.615	1.26901	0.134885	9.40805	5.05e-21	1.5e-19	AC024060.2	up
C10orf99	9.20807	-3.6632	0.389479	-9.40538	5.18e-21	1.53e-19	C10orf99	down
ATP1B1	3116.64	-1.20142	0.127754	-9.4042	5.24e-21	1.55e-19	ATP1B1	down
SYNGR2	27374.2	0.767479	0.0816249	9.40251	5.33e-21	1.57e-19	SYNGR2	no
SLC16A5	534.186	-1.68394	0.179148	-9.39975	5.47e-21	1.61e-19	SLC16A5	down
TRPC1	294.33	-1.14103	0.121422	-9.39723	5.6e-21	1.65e-19	TRPC1	down
RABEP2	5988.49	1.02348	0.108922	9.39644	5.64e-21	1.66e-19	RABEP2	up
AL032819.2	581.85	1.41886	0.151006	9.39604	5.67e-21	1.67e-19	AL032819.2	up
GPR160	4851.59	1.01479	0.108009	9.39543	5.7e-21	1.68e-19	GPR160	up
ZNF121	1982.88	0.678178	0.072219	9.39058	5.97e-21	1.75e-19	ZNF121	no
UCA1	12.6402	-2.44578	0.260478	-9.38959	6.02e-21	1.77e-19	UCA1	down
SYNE4	1756.81	0.957985	0.102033	9.38895	6.06e-21	1.78e-19	SYNE4	no
SNORA33	44.219	1.48329	0.158013	9.38717	6.16e-21	1.81e-19	SNORA33	up
TIMP3	16600	-1.18211	0.125943	-9.38606	6.23e-21	1.83e-19	TIMP3	down
KIF26B	276.313	-1.56199	0.16643	-9.38529	6.27e-21	1.84e-19	KIF26B	down
IRF7	1800.69	1.07805	0.114904	9.38215	6.46e-21	1.89e-19	IRF7	up
TRGJ1	6.54682	2.81861	0.300443	9.38151	6.5e-21	1.9e-19	TRGJ1	up
GPR89B	197.286	0.739201	0.0788048	9.38015	6.59e-21	1.92e-19	GPR89B	no
ELAVL2	199.33	2.2338	0.238177	9.37873	6.68e-21	1.95e-19	ELAVL2	up
PARM1	9141.4	-1.15609	0.123267	-9.3787	6.68e-21	1.95e-19	PARM1	down
ANKRD45	11.5814	-1.66459	0.177515	-9.37719	6.78e-21	1.98e-19	ANKRD45	down
AC013731.1	18.5153	1.65645	0.176688	9.37503	6.92e-21	2.01e-19	AC013731.1	up
TTYH3	4893.35	0.824491	0.087945	9.37507	6.91e-21	2.01e-19	TTYH3	no
GCOM1	138.789	-1.23097	0.131337	-9.37261	7.08e-21	2.06e-19	GCOM1	down
A2M-AS1	100.264	-0.828981	0.0884687	-9.37033	7.23e-21	2.1e-19	A2M-AS1	no
AC080129.2	15.7352	1.86391	0.198996	9.36655	7.49e-21	2.18e-19	AC080129.2	up
SCN2B	98.9814	-1.67972	0.17935	-9.36562	7.56e-21	2.19e-19	SCN2B	down
RASSF5	864.123	-1.16493	0.124386	-9.36543	7.57e-21	2.2e-19	RASSF5	down
MPHOSPH8	3579.46	-0.406694	0.0434376	-9.36273	7.77e-21	2.25e-19	MPHOSPH8	no
SLITRK6	394.145	-1.75532	0.187506	-9.36142	7.87e-21	2.28e-19	SLITRK6	down
AC013470.2	13.5004	2.48232	0.265174	9.36108	7.89e-21	2.28e-19	AC013470.2	up
FER	789.725	-0.890921	0.0951931	-9.3591	8.04e-21	2.32e-19	FER	no
LINC00342	541.427	1.09147	0.116621	9.35907	8.04e-21	2.32e-19	LINC00342	up
METAP1D	605.748	0.601128	0.0642413	9.35733	8.18e-21	2.36e-19	METAP1D	no
KCNQ5	106.45	-1.565	0.167251	-9.35719	8.19e-21	2.36e-19	KCNQ5	down
RPSAP7	30.5723	1.96104	0.209579	9.35702	8.2e-21	2.37e-19	RPSAP7	up
TRUB2	2485.36	0.581389	0.0621418	9.35585	8.29e-21	2.39e-19	TRUB2	no
MSMO1	3465.32	-0.969466	0.103643	-9.35387	8.45e-21	2.43e-19	MSMO1	no
SPRY2	921.633	-0.832277	0.0890014	-9.35129	8.66e-21	2.49e-19	SPRY2	no
ASPH	3465.7	-1.02691	0.109839	-9.34925	8.83e-21	2.54e-19	ASPH	down
ZNF204P	358.181	-1.43917	0.153948	-9.34839	8.9e-21	2.56e-19	ZNF204P	down
DZIP1	528.98	-1.13375	0.121286	-9.34769	8.96e-21	2.57e-19	DZIP1	down
PKIB	1120.5	1.62752	0.174124	9.34689	9.03e-21	2.59e-19	PKIB	up
IQCK	285.362	-0.749949	0.0802388	-9.34647	9.06e-21	2.6e-19	IQCK	no
HELQ	563.331	-0.365005	0.0390558	-9.34573	9.13e-21	2.61e-19	HELQ	no
ZP3	462.774	1.3999	0.149802	9.34498	9.19e-21	2.63e-19	ZP3	up
GLYATL1B	25.7173	2.19409	0.2348	9.3445	9.23e-21	2.64e-19	GLYATL1B	up
SMIM28	23.5296	2.32213	0.248527	9.34361	9.31e-21	2.66e-19	SMIM28	up
IL6ST	9647.47	-0.810477	0.0867536	-9.34228	9.43e-21	2.69e-19	IL6ST	no
GPD1L	5241.36	-0.870094	0.0931396	-9.34183	9.47e-21	2.7e-19	GPD1L	no
FFAR2	627.178	1.7416	0.186442	9.34124	9.52e-21	2.72e-19	FFAR2	up
B4GALT3	3038.02	0.543439	0.058179	9.34081	9.56e-21	2.73e-19	B4GALT3	no
HCG11	577.362	-1.11751	0.119641	-9.34053	9.59e-21	2.73e-19	HCG11	down
H4C4	31.1326	1.99705	0.213858	9.33821	9.8e-21	2.79e-19	H4C4	up
WWTR1	3801.23	-0.820892	0.0879092	-9.33796	9.82e-21	2.79e-19	WWTR1	no
ADCY5	1564.35	-1.38221	0.148095	-9.3333	1.03e-20	2.92e-19	ADCY5	down
RGL2	6780.76	0.768845	0.0824	9.33064	1.05e-20	2.99e-19	RGL2	no
APOE	5413.97	1.65166	0.177016	9.33056	1.05e-20	2.99e-19	APOE	up
DOCK3	199.799	-1.4171	0.151924	-9.32772	1.08e-20	3.07e-19	DOCK3	down
FZD1	2640.24	-0.796283	0.0853716	-9.32725	1.09e-20	3.08e-19	FZD1	no
CEP120	1106.86	-0.596944	0.0640128	-9.32539	1.11e-20	3.13e-19	CEP120	no
CDK5R1	206.973	1.11918	0.120073	9.32085	1.15e-20	3.27e-19	CDK5R1	up
CD81	37079.6	-0.747253	0.0801753	-9.32024	1.16e-20	3.28e-19	CD81	no
NSUN5P1	807.473	1.2995	0.139443	9.31927	1.17e-20	3.31e-19	NSUN5P1	up
RIMKLA	597.399	0.946536	0.101567	9.31934	1.17e-20	3.31e-19	RIMKLA	no
AC073593.2	5.62653	-1.60903	0.17266	-9.31911	1.17e-20	3.31e-19	AC073593.2	down
AC036108.3	109.405	-1.5208	0.163207	-9.3182	1.18e-20	3.34e-19	AC036108.3	down
PGAP1	761.002	-0.958448	0.102862	-9.31777	1.19e-20	3.35e-19	PGAP1	no
ITLN1	25.2226	-2.75086	0.295244	-9.31724	1.19e-20	3.36e-19	ITLN1	down
AC020978.4	27.3049	1.19526	0.128301	9.3161	1.21e-20	3.4e-19	AC020978.4	up
TOR2A	992.581	0.680144	0.0730081	9.31601	1.21e-20	3.4e-19	TOR2A	no
GLYATL1P2	23.3418	3.21491	0.345118	9.31541	1.21e-20	3.42e-19	GLYATL1P2	up
HCN4	20.0665	-1.97332	0.211893	-9.31281	1.24e-20	3.5e-19	HCN4	down
LINC01518	213.812	3.03437	0.325881	9.31129	1.26e-20	3.55e-19	LINC01518	up
B4GALT6	438.366	-0.973052	0.104506	-9.31094	1.27e-20	3.55e-19	B4GALT6	no
RPP40	233.976	0.780006	0.0838005	9.30789	1.3e-20	3.66e-19	RPP40	no
SEMA3A	164.66	-1.69982	0.18264	-9.30698	1.32e-20	3.68e-19	SEMA3A	down
CES5A	9.13018	-5.54251	0.595581	-9.30605	1.33e-20	3.71e-19	CES5A	down
YJEFN3	244.567	1.66258	0.178694	9.30406	1.35e-20	3.78e-19	YJEFN3	up
LINC01139	39.8789	-3.27344	0.351871	-9.30293	1.37e-20	3.82e-19	LINC01139	down
SNAPC4	1316.78	0.689699	0.0741524	9.3011	1.39e-20	3.88e-19	SNAPC4	no
MFSD12	2495.62	0.808235	0.0869431	9.29614	1.46e-20	4.06e-19	MFSD12	no
SNORD3A	378.452	2.60781	0.280524	9.29619	1.46e-20	4.06e-19	SNORD3A	up
PLCL1	604.926	-1.64063	0.17651	-9.29484	1.47e-20	4.11e-19	PLCL1	down
DENND2C	207.044	-0.888713	0.095628	-9.29344	1.49e-20	4.16e-19	DENND2C	no
AL136524.1	47.0874	2.83439	0.304993	9.2933	1.5e-20	4.16e-19	AL136524.1	up
NCAPG	127.232	1.70489	0.183455	9.29326	1.5e-20	4.16e-19	NCAPG	up
AC053545.1	207.227	1.44956	0.155992	9.29252	1.51e-20	4.18e-19	AC053545.1	up
AL590438.1	1.62707	-3.28054	0.353027	-9.29259	1.51e-20	4.18e-19	AL590438.1	down
Z82210.1	13.4855	6.11274	0.657804	9.29265	1.5e-20	4.18e-19	Z82210.1	up
RIPK2	1599.75	0.843086	0.0907325	9.292	1.51e-20	4.2e-19	RIPK2	no
FHOD3	1080.13	-1.36656	0.147073	-9.29172	1.52e-20	4.21e-19	FHOD3	down
AC005082.1	13.8038	-1.54117	0.165868	-9.29154	1.52e-20	4.21e-19	AC005082.1	down
CCBE1	139.115	-1.98624	0.213773	-9.29138	1.52e-20	4.21e-19	CCBE1	down
KCNAB1	731.46	-1.54449	0.166229	-9.29135	1.52e-20	4.21e-19	KCNAB1	down
SNRNP70	12779	0.907529	0.097696	9.28931	1.55e-20	4.29e-19	SNRNP70	no
LINC01524	6.35977	3.23824	0.34864	9.28818	1.57e-20	4.34e-19	LINC01524	up
SLC22A10	50.286	2.77378	0.298659	9.28745	1.58e-20	4.36e-19	SLC22A10	up
AL161665.2	6.84	-1.41589	0.152479	-9.28584	1.6e-20	4.43e-19	AL161665.2	down
FAM162B	73.8239	-1.28434	0.138325	-9.28495	1.62e-20	4.46e-19	FAM162B	down
NXPH2	1.88576	-2.75812	0.297064	-9.28462	1.62e-20	4.47e-19	NXPH2	down
SGSM3	79.4437	1.41834	0.152765	9.28444	1.63e-20	4.48e-19	SGSM3	up
DNAJB1	9837.85	-1.2148	0.130847	-9.28413	1.63e-20	4.49e-19	DNAJB1	down
ST6GALNAC2	83.1304	-1.70155	0.183311	-9.28229	1.66e-20	4.56e-19	ST6GALNAC2	down
CA12	629.995	-1.54099	0.166016	-9.28219	1.66e-20	4.56e-19	CA12	down
BEND4	2633.02	1.65652	0.178499	9.28029	1.69e-20	4.64e-19	BEND4	up
SPON2	71884.5	2.25673	0.243179	9.28012	1.69e-20	4.64e-19	SPON2	up
AC007541.1	70.0301	-0.856389	0.0922896	-9.27936	1.7e-20	4.67e-19	AC007541.1	no
RNA5SP154	0.720481	-2.23186	0.240523	-9.27922	1.71e-20	4.68e-19	RNA5SP154	down
RPL10P19	24.5388	1.48974	0.160593	9.27647	1.75e-20	4.8e-19	RPL10P19	up
RPS2P32	13.7547	-1.1702	0.126169	-9.2748	1.78e-20	4.87e-19	RPS2P32	down
DNAH14	333.563	0.809908	0.0873549	9.27147	1.84e-20	5.02e-19	DNAH14	no
GRIP1	372.558	-0.908593	0.0980017	-9.27119	1.84e-20	5.03e-19	GRIP1	no
IPO4	9.98968	1.52428	0.164409	9.27124	1.84e-20	5.03e-19	IPO4	up
FOXJ2	1745.26	-0.486507	0.0524869	-9.26912	1.88e-20	5.12e-19	FOXJ2	no
ATP11C	1289.69	-0.820517	0.088526	-9.26865	1.89e-20	5.14e-19	ATP11C	no
BPHL	697.08	0.735502	0.0793546	9.26855	1.89e-20	5.14e-19	BPHL	no
LRATD2	3275.22	0.788389	0.0850628	9.26832	1.89e-20	5.15e-19	LRATD2	no
OR51A4	8.10623	3.1568	0.340619	9.26784	1.9e-20	5.17e-19	OR51A4	up
ROS1	20.0507	-2.76643	0.298507	-9.26755	1.9e-20	5.18e-19	ROS1	down
NECTIN2	12216.8	0.694121	0.0749106	9.26599	1.93e-20	5.25e-19	NECTIN2	no
AC245100.2	18.2479	1.85272	0.199965	9.26523	1.95e-20	5.29e-19	AC245100.2	up
VAV3	375.113	-1.35191	0.145931	-9.264	1.97e-20	5.34e-19	VAV3	down
EVX2	55.9442	-2.26976	0.24505	-9.26246	2e-20	5.42e-19	EVX2	down
AL158847.1	4.46219	-1.66643	0.17995	-9.26051	2.03e-20	5.51e-19	AL158847.1	down
SSPN	1195.8	-1.06347	0.114841	-9.26036	2.04e-20	5.52e-19	SSPN	down
RPL36A	89.8063	1.01239	0.109327	9.26024	2.04e-20	5.52e-19	RPL36A	up
AC005083.1	30.4485	-1.64015	0.177133	-9.25939	2.06e-20	5.56e-19	AC005083.1	down
SLC24A4	25.0694	-1.58559	0.17124	-9.25943	2.06e-20	5.56e-19	SLC24A4	down
SLC22A31	160.877	2.60703	0.281648	9.25633	2.12e-20	5.72e-19	SLC22A31	up
GJD3	141.208	-1.03326	0.111654	-9.25415	2.16e-20	5.83e-19	GJD3	down
SLC8A1	1380.24	-1.46221	0.158023	-9.25314	2.18e-20	5.88e-19	SLC8A1	down
RBP1	644.102	-1.52279	0.164572	-9.25299	2.18e-20	5.88e-19	RBP1	down
KLK15	403.004	1.98889	0.214985	9.25126	2.22e-20	5.98e-19	KLK15	up
AL049874.3	11.4271	1.58456	0.171329	9.24864	2.27e-20	6.12e-19	AL049874.3	up
ITGB3	306.704	-1.30725	0.141393	-9.2455	2.34e-20	6.3e-19	ITGB3	down
TSBP1-AS1	55.2331	-1.4446	0.15625	-9.2454	2.34e-20	6.3e-19	TSBP1-AS1	down
AC011487.1	149.722	2.0632	0.223289	9.24004	2.46e-20	6.62e-19	AC011487.1	up
ADGRF3	37.359	-0.834086	0.0902863	-9.23823	2.51e-20	6.73e-19	ADGRF3	no
DNPH1	2263.11	0.910377	0.0985658	9.23624	2.55e-20	6.85e-19	DNPH1	no
C16orf74	81.2464	-1.55248	0.168108	-9.23504	2.58e-20	6.92e-19	C16orf74	down
DGKD	3532.18	0.728537	0.0789017	9.23348	2.62e-20	7.02e-19	DGKD	no
GNG11	986.752	-1.0876	0.117801	-9.23247	2.64e-20	7.08e-19	GNG11	down
EFHD1	597.054	-1.30014	0.140825	-9.23232	2.65e-20	7.09e-19	EFHD1	down
GAS2L1	1981.61	-0.877857	0.0951109	-9.22982	2.71e-20	7.24e-19	GAS2L1	no
REXO2	3876.64	1.0982	0.118984	9.22982	2.71e-20	7.24e-19	REXO2	up
CHST3	1216.32	-1.16986	0.126751	-9.22958	2.72e-20	7.26e-19	CHST3	down
ARHGEF10L	1968.12	-0.599097	0.064916	-9.2288	2.74e-20	7.3e-19	ARHGEF10L	no
ZSCAN26	618.51	-0.401473	0.043504	-9.22841	2.75e-20	7.33e-19	ZSCAN26	no
SH3RF1	7303.97	1.18256	0.12815	9.22792	2.76e-20	7.35e-19	SH3RF1	up
LRRC45	1582.6	0.90627	0.098224	9.22656	2.79e-20	7.44e-19	LRRC45	no
TENT5B	509.829	-1.72623	0.187101	-9.22621	2.8e-20	7.46e-19	TENT5B	down
ACTN4	18128	-0.555347	0.0601966	-9.22556	2.82e-20	7.5e-19	ACTN4	no
MOB3B	303.428	-1.03156	0.111866	-9.22133	2.93e-20	7.8e-19	MOB3B	down
AC092171.4	25.5062	1.75021	0.189805	9.22111	2.94e-20	7.81e-19	AC092171.4	up
LINC02804	29.3537	1.58798	0.172237	9.21976	2.98e-20	7.9e-19	LINC02804	up
FAM76A	681.421	-0.411986	0.0446897	-9.21883	3e-20	7.97e-19	FAM76A	no
KIF4A	240.283	1.777	0.192799	9.21686	3.06e-20	8.11e-19	KIF4A	up
DIPK1B	440.689	0.979501	0.106279	9.21628	3.08e-20	8.15e-19	DIPK1B	no
HOXD8	201.612	-1.37746	0.149492	-9.21429	3.13e-20	8.3e-19	HOXD8	down
LINC02235	22.46	1.44872	0.157262	9.2121	3.2e-20	8.46e-19	LINC02235	up
AL596442.2	38.1457	1.94152	0.210762	9.21193	3.2e-20	8.47e-19	AL596442.2	up
ECI2	2631.03	0.91464	0.09929	9.2118	3.21e-20	8.47e-19	ECI2	no
AC021148.2	1120.32	1.94974	0.211761	9.20727	3.35e-20	8.83e-19	AC021148.2	up
KLF8	248.978	-1.00695	0.10937	-9.20677	3.36e-20	8.87e-19	KLF8	down
CTSB	27191.8	-0.822933	0.089385	-9.2066	3.37e-20	8.88e-19	CTSB	no
MIOX	26.5329	1.97007	0.213999	9.20601	3.38e-20	8.92e-19	MIOX	up
MSLN	253.763	-2.73613	0.297223	-9.20564	3.4e-20	8.95e-19	MSLN	down
ACP4	43.5984	1.59957	0.173764	9.20542	3.4e-20	8.96e-19	ACP4	up
ARHGEF25	264.915	-1.20978	0.131453	-9.20315	3.48e-20	9.14e-19	ARHGEF25	down
ELF3-AS1	274.452	0.968523	0.10525	9.2021	3.51e-20	9.22e-19	ELF3-AS1	no
FOXM1	308.123	1.4824	0.161093	9.20216	3.51e-20	9.22e-19	FOXM1	up
EHD2	4092.49	-1.18641	0.128934	-9.20166	3.52e-20	9.25e-19	EHD2	down
ADRA2B	48.7054	-1.48156	0.161046	-9.19962	3.59e-20	9.42e-19	ADRA2B	down
CNTFR	162.768	-1.81115	0.196889	-9.19881	3.62e-20	9.49e-19	CNTFR	down
RUNDC3A-AS1	97.4687	1.40999	0.153326	9.19604	3.71e-20	9.73e-19	RUNDC3A-AS1	up
LUZP2	1892.97	1.85926	0.202222	9.19417	3.78e-20	9.89e-19	LUZP2	up
AC010255.2	62.2572	3.30053	0.359013	9.19334	3.81e-20	9.96e-19	AC010255.2	up
HOGA1	36.7277	-1.70052	0.185052	-9.18941	3.95e-20	1.03e-18	HOGA1	down
PPP1R14BP3	511.402	1.21145	0.131846	9.18833	3.99e-20	1.04e-18	PPP1R14BP3	up
RADX	46.5982	-1.47679	0.160729	-9.18809	4e-20	1.04e-18	RADX	down
AC011468.1	125.297	0.937832	0.102075	9.18766	4.01e-20	1.05e-18	AC011468.1	no
AC107918.4	45.7475	-1.64076	0.178601	-9.18669	4.05e-20	1.06e-18	AC107918.4	down
CAVIN1	17973.3	-1.1636	0.126661	-9.18673	4.05e-20	1.06e-18	CAVIN1	down
FLNC	14314.8	-1.73007	0.18839	-9.18349	4.17e-20	1.09e-18	FLNC	down
TSHZ3	1052.17	-1.02192	0.111296	-9.18196	4.23e-20	1.1e-18	TSHZ3	down
ELL3	10.8802	1.52146	0.165717	9.18107	4.27e-20	1.11e-18	ELL3	up
GPRASP1	1109.78	-1.14875	0.125129	-9.18053	4.29e-20	1.12e-18	GPRASP1	down
PLA2G4C-AS1	13.6879	2.28258	0.24867	9.17915	4.35e-20	1.13e-18	PLA2G4C-AS1	up
RGS9	281.6	-1.27713	0.139157	-9.17762	4.41e-20	1.14e-18	RGS9	down
AC012073.1	23.3504	0.956699	0.104245	9.17743	4.41e-20	1.15e-18	AC012073.1	no
BAIAP3	1768.52	1.01266	0.110353	9.17662	4.45e-20	1.15e-18	BAIAP3	up
PHETA1	1208.32	0.624082	0.068018	9.17525	4.51e-20	1.17e-18	PHETA1	no
DEFB131E	13.6001	-1.84915	0.201589	-9.17288	4.61e-20	1.19e-18	DEFB131E	down
IRX4-AS1	74.9807	1.61835	0.176581	9.16492	4.96e-20	1.28e-18	IRX4-AS1	up
GNA14	439.855	-0.762989	0.0832539	-9.1646	4.97e-20	1.29e-18	GNA14	no
MEN1	2875.1	0.505548	0.0551646	9.16436	4.98e-20	1.29e-18	MEN1	no
ATP6V0D2	31.0506	-2.11537	0.230838	-9.1639	5.01e-20	1.29e-18	ATP6V0D2	down
ACTA2	23775.6	-1.43468	0.156574	-9.16296	5.05e-20	1.3e-18	ACTA2	down
HDAC10	51.3429	1.42165	0.155161	9.1624	5.08e-20	1.31e-18	HDAC10	up
KIAA1614	141.928	-1.11762	0.121981	-9.16227	5.08e-20	1.31e-18	KIAA1614	down
ATAT1	993.794	0.678957	0.074106	9.16197	5.1e-20	1.31e-18	ATAT1	no
EME2	905.28	1.29219	0.141041	9.1618	5.1e-20	1.31e-18	EME2	up
CCDC178	74.0548	-1.69064	0.184535	-9.16163	5.11e-20	1.31e-18	CCDC178	down
GCNT1	4836.9	1.56864	0.171218	9.16166	5.11e-20	1.31e-18	GCNT1	up
SHMT2	3620.93	0.784961	0.0856883	9.16065	5.16e-20	1.33e-18	SHMT2	no
PRTFDC1	165.023	-1.16858	0.127579	-9.15965	5.21e-20	1.34e-18	PRTFDC1	down
ZNF692	2255.74	1.06345	0.116105	9.1594	5.22e-20	1.34e-18	ZNF692	up
SOWAHA	185.778	-1.55618	0.169902	-9.15927	5.22e-20	1.34e-18	SOWAHA	down
NEIL3	27.1963	1.94749	0.212636	9.1588	5.25e-20	1.35e-18	NEIL3	up
RPRML	13.5107	3.55299	0.387978	9.15773	5.3e-20	1.36e-18	RPRML	up
AL355355.2	11.0061	-1.17428	0.128239	-9.15693	5.34e-20	1.37e-18	AL355355.2	down
TNN	38.3038	2.26154	0.246989	9.15644	5.36e-20	1.37e-18	TNN	up
AC013287.1	38.3033	1.62094	0.177042	9.1557	5.4e-20	1.38e-18	AC013287.1	up
PAICS	7716.13	0.684191	0.074732	9.15526	5.42e-20	1.39e-18	PAICS	no
FAM89B	273.247	1.14484	0.125061	9.15428	5.47e-20	1.4e-18	FAM89B	up
ZNF350	3606.9	0.826106	0.0902463	9.1539	5.49e-20	1.4e-18	ZNF350	no
HLF	1047.55	-1.23435	0.134882	-9.15135	5.62e-20	1.43e-18	HLF	down
ZBTB47	1400.75	-0.802381	0.0876849	-9.15073	5.65e-20	1.44e-18	ZBTB47	no
MEIS3P1	134.379	-1.33932	0.146372	-9.15014	5.69e-20	1.45e-18	MEIS3P1	down
SOSTDC1	83.2437	-1.93418	0.211411	-9.14893	5.75e-20	1.46e-18	SOSTDC1	down
SAPCD2	1032.85	1.09077	0.119226	9.14879	5.76e-20	1.46e-18	SAPCD2	up
LINC02584	1.43164	-4.17176	0.456002	-9.14855	5.77e-20	1.47e-18	LINC02584	down
CYP4F22	131.431	-2.56005	0.279854	-9.14781	5.81e-20	1.48e-18	CYP4F22	down
OR7E47P	125.639	1.39694	0.152725	9.14677	5.87e-20	1.49e-18	OR7E47P	up
FOXA1	25135	0.882848	0.0965422	9.14469	5.98e-20	1.52e-18	FOXA1	no
POR	6417.21	-0.765907	0.0837718	-9.14278	6.09e-20	1.54e-18	POR	no
OR51F5P	12.0808	2.85879	0.312704	9.14218	6.12e-20	1.55e-18	OR51F5P	up
GIPC2	116.763	-1.28621	0.140698	-9.14164	6.15e-20	1.56e-18	GIPC2	down
LRRC37A7P	56.7833	-1.37611	0.150585	-9.13839	6.34e-20	1.6e-18	LRRC37A7P	down
AC012307.1	5.96674	-4.74467	0.519233	-9.13783	6.37e-20	1.61e-18	AC012307.1	down
ROCK2	2871.24	-0.706946	0.0773845	-9.1355	6.51e-20	1.65e-18	ROCK2	no
EIF4BP3	83.9189	1.03612	0.113427	9.13469	6.56e-20	1.66e-18	EIF4BP3	up
SLC47A1	160.458	-1.35092	0.1479	-9.13406	6.6e-20	1.67e-18	SLC47A1	down
PLPPR2	4144.74	0.680136	0.0744677	9.1333	6.64e-20	1.68e-18	PLPPR2	no
MYL5	937.671	1.02822	0.112583	9.13307	6.66e-20	1.68e-18	MYL5	up
CCDC8	559.996	-1.38081	0.1512	-9.1323	6.71e-20	1.69e-18	CCDC8	down
LINC01869	40.6265	1.32894	0.145527	9.1319	6.73e-20	1.69e-18	LINC01869	up
EDNRB	1079.41	-1.64026	0.179651	-9.13026	6.83e-20	1.72e-18	EDNRB	down
LINC00853	51.2593	1.44072	0.157849	9.12721	7.03e-20	1.77e-18	LINC00853	up
AC008771.1	99.0046	0.837322	0.0917431	9.12681	7.05e-20	1.77e-18	AC008771.1	no
MCMDC2	123.127	0.948078	0.103909	9.12413	7.23e-20	1.82e-18	MCMDC2	no
RAB6C	157.171	1.07605	0.117936	9.12399	7.24e-20	1.82e-18	RAB6C	up
KLF16	931.124	0.870044	0.0953637	9.12342	7.28e-20	1.83e-18	KLF16	no
HOXB-AS4	0.983331	-3.26689	0.358092	-9.12306	7.3e-20	1.83e-18	HOXB-AS4	down
SNHG17	1349.77	0.939165	0.102947	9.12283	7.32e-20	1.83e-18	SNHG17	no
AL355338.1	6.00052	4.0197	0.440659	9.122	7.37e-20	1.85e-18	AL355338.1	up
B3GAT1	1950.15	1.64565	0.180421	9.12115	7.43e-20	1.86e-18	B3GAT1	up
FGF10	239.565	-1.69209	0.185529	-9.12034	7.49e-20	1.87e-18	FGF10	down
RNF182	22.3602	-1.68065	0.184301	-9.11905	7.58e-20	1.89e-18	RNF182	down
SRF	4965.17	-0.669822	0.0734648	-9.11758	7.68e-20	1.92e-18	SRF	no
GPRIN1	106.39	1.2492	0.137038	9.1157	7.82e-20	1.95e-18	GPRIN1	up
DGCR5	44.0507	1.61396	0.177057	9.11549	7.83e-20	1.95e-18	DGCR5	up
AFF2	79.2365	-1.77682	0.195003	-9.11177	8.1e-20	2.02e-18	AFF2	down
DVL1	5005.72	0.717422	0.0787392	9.11137	8.13e-20	2.03e-18	DVL1	no
SS18L1	1319.84	0.51315	0.0563299	9.10972	8.26e-20	2.06e-18	SS18L1	no
CEP83	541.384	0.642252	0.0705197	9.10741	8.44e-20	2.1e-18	CEP83	no
AF165147.1	621.971	-1.82258	0.20014	-9.10652	8.51e-20	2.12e-18	AF165147.1	down
ZNF511	701.025	1.11213	0.122155	9.10427	8.68e-20	2.16e-18	ZNF511	up
HACD1	316.296	-1.16186	0.127626	-9.10366	8.73e-20	2.17e-18	HACD1	down
PSMA6	147.251	0.871571	0.095745	9.10305	8.78e-20	2.18e-18	PSMA6	no
AL356133.1	27.6242	4.55132	0.500001	9.10262	8.82e-20	2.19e-18	AL356133.1	up
AC024937.3	11.3366	2.0872	0.229349	9.10052	8.99e-20	2.23e-18	AC024937.3	up
ZNF804A	58.8657	-1.64624	0.180912	-9.09967	9.06e-20	2.24e-18	ZNF804A	down
AC012085.2	80.484	-1.80334	0.198221	-9.09763	9.23e-20	2.29e-18	AC012085.2	down
SNHG8	6290.46	1.07744	0.118467	9.09492	9.47e-20	2.34e-18	SNHG8	up
PRKCA	1898.08	-1.21346	0.133435	-9.09398	9.55e-20	2.36e-18	PRKCA	down
ENAH	6967.81	-0.67606	0.0743435	-9.09374	9.57e-20	2.36e-18	ENAH	no
DSE	688.718	-0.843308	0.0927409	-9.09317	9.62e-20	2.38e-18	DSE	no
FASN	73219.1	1.34701	0.148139	9.09289	9.64e-20	2.38e-18	FASN	up
SRM	4209.78	0.8857	0.0974069	9.09278	9.65e-20	2.38e-18	SRM	no
SNTG2-AS1	175.152	2.39589	0.263503	9.09248	9.68e-20	2.39e-18	SNTG2-AS1	up
INSYN1	419.681	-1.40762	0.154828	-9.09151	9.77e-20	2.41e-18	INSYN1	down
AL359552.1	12.5031	1.7871	0.196599	9.09007	9.9e-20	2.44e-18	AL359552.1	up
SNAI2	748.774	-1.57204	0.17295	-9.08956	9.94e-20	2.45e-18	SNAI2	down
AC017048.3	1.43641	-2.4589	0.270548	-9.08858	1e-19	2.47e-18	AC017048.3	down
NRG2	100.396	-1.57981	0.173828	-9.08832	1.01e-19	2.47e-18	NRG2	down
GJB1	4957.99	1.37797	0.151645	9.0868	1.02e-19	2.51e-18	GJB1	up
FUT2	160.164	-1.72097	0.18942	-9.0855	1.03e-19	2.53e-18	FUT2	down
ZSCAN16	274.931	0.725551	0.0798583	9.08548	1.03e-19	2.53e-18	ZSCAN16	no
AL121906.2	78.1111	0.96601	0.106336	9.08454	1.04e-19	2.55e-18	AL121906.2	no
POLR1G	178.393	0.682036	0.0750767	9.08452	1.04e-19	2.55e-18	POLR1G	no
AL139246.5	234.33	1.71549	0.188838	9.08443	1.04e-19	2.55e-18	AL139246.5	up
CBX4	2481.56	0.795057	0.0875249	9.08379	1.05e-19	2.57e-18	CBX4	no
STK32C	674.962	0.88466	0.0973954	9.08318	1.05e-19	2.58e-18	STK32C	no
AC084759.3	23.0604	-2.52655	0.278167	-9.08285	1.06e-19	2.59e-18	AC084759.3	down
FAM87A	20.652	2.4532	0.270138	9.08126	1.07e-19	2.62e-18	FAM87A	up
PEAK1	1290.33	-1.24997	0.137662	-9.08001	1.09e-19	2.65e-18	PEAK1	down
AC018521.6	21.6143	-0.854657	0.0941323	-9.07932	1.09e-19	2.67e-18	AC018521.6	no
OR51A8P	22.2955	2.51654	0.277181	9.07902	1.1e-19	2.67e-18	OR51A8P	up
AP000812.4	10.7859	1.16615	0.128468	9.07735	1.11e-19	2.71e-18	AP000812.4	up
LINC00115	64.651	1.1692	0.12881	9.07697	1.12e-19	2.72e-18	LINC00115	up
ASIC3	123.366	1.55224	0.171024	9.07612	1.13e-19	2.74e-18	ASIC3	up
KRT16	216.251	-2.45462	0.270493	-9.07462	1.14e-19	2.77e-18	KRT16	down
PLK1	193.531	1.4259	0.157133	9.0745	1.14e-19	2.78e-18	PLK1	up
CALR4P	51.9934	1.53316	0.168965	9.07384	1.15e-19	2.79e-18	CALR4P	up
TSPAN2	767.935	-1.20773	0.133103	-9.07364	1.15e-19	2.79e-18	TSPAN2	down
AC016924.1	4.06267	-1.71141	0.188619	-9.07338	1.15e-19	2.8e-18	AC016924.1	down
SOX7	250.034	-1.26328	0.139247	-9.07225	1.17e-19	2.83e-18	SOX7	down
SHC2	5063.84	1.04384	0.115096	9.06931	1.2e-19	2.9e-18	SHC2	up
ADCY9	923.334	-0.857817	0.0945876	-9.06902	1.2e-19	2.91e-18	ADCY9	no
LNX1-AS2	2.39813	-2.46943	0.272323	-9.06805	1.21e-19	2.93e-18	LNX1-AS2	down
TMEM47	2317.35	-1.07641	0.118712	-9.06739	1.22e-19	2.95e-18	TMEM47	down
RUSC2	1506.56	-0.830068	0.091546	-9.06722	1.22e-19	2.95e-18	RUSC2	no
ZFHX2-AS1	64.3853	1.43903	0.158712	9.06693	1.22e-19	2.96e-18	ZFHX2-AS1	up
DNAJC27	358.203	-0.509753	0.056222	-9.0668	1.23e-19	2.96e-18	DNAJC27	no
AC096667.1	8.08751	-1.33129	0.146867	-9.06461	1.25e-19	3.02e-18	AC096667.1	down
ANK2	564.902	-1.43055	0.157822	-9.0643	1.25e-19	3.02e-18	ANK2	down
MDFIC	875.639	-0.968064	0.106806	-9.06379	1.26e-19	3.04e-18	MDFIC	no
ERBB3	15245.5	0.758824	0.0837212	9.0637	1.26e-19	3.04e-18	ERBB3	no
RUVBL1	2693.54	0.679721	0.0749997	9.06298	1.27e-19	3.06e-18	RUVBL1	no
HRAT92	193.747	1.5281	0.168624	9.06214	1.28e-19	3.08e-18	HRAT92	up
EZH1	2123.67	-0.478503	0.0528081	-9.06116	1.29e-19	3.1e-18	EZH1	no
ZNF528-AS1	734.606	0.751732	0.0829639	9.06095	1.29e-19	3.11e-18	ZNF528-AS1	no
DCBLD2	1599.44	-0.734126	0.0810302	-9.05992	1.31e-19	3.14e-18	DCBLD2	no
SCHLAP1	283.782	3.46285	0.382264	9.05878	1.32e-19	3.17e-18	SCHLAP1	up
APOBR	387.615	-1.21431	0.134157	-9.05134	1.41e-19	3.39e-18	APOBR	down
MGARP	22.6709	-1.32871	0.146797	-9.05137	1.41e-19	3.39e-18	MGARP	down
AL512598.1	6.97927	-1.43555	0.158605	-9.0511	1.42e-19	3.39e-18	AL512598.1	down
AJAP1	123.968	-1.60817	0.177691	-9.05039	1.42e-19	3.41e-18	AJAP1	down
SLC10A4	23.9421	1.73996	0.19226	9.05006	1.43e-19	3.42e-18	SLC10A4	up
PIMREGP2	2.85774	2.9514	0.326179	9.04841	1.45e-19	3.47e-18	PIMREGP2	up
H4C5	266.657	2.19052	0.242108	9.04769	1.46e-19	3.49e-18	H4C5	up
AL023803.1	9.23926	2.16261	0.239061	9.04629	1.48e-19	3.53e-18	AL023803.1	up
PTP4A2	8030.4	-0.45753	0.050579	-9.04584	1.49e-19	3.55e-18	PTP4A2	no
AL390719.1	152.948	1.479	0.163504	9.04564	1.49e-19	3.55e-18	AL390719.1	up
DUSP4	1773.25	-1.79772	0.198769	-9.04428	1.51e-19	3.59e-18	DUSP4	down
IVNS1ABP	4615.01	-0.605319	0.0669411	-9.04256	1.53e-19	3.65e-18	IVNS1ABP	no
RPL23A	11038.3	0.841967	0.0931182	9.04192	1.54e-19	3.67e-18	RPL23A	no
PUM3	1413.56	0.473168	0.0523396	9.04035	1.56e-19	3.72e-18	PUM3	no
C1QTNF1-AS1	2.50211	-2.87628	0.318241	-9.03807	1.59e-19	3.79e-18	C1QTNF1-AS1	down
BNIPL	266.63	-1.71207	0.189433	-9.03789	1.6e-19	3.8e-18	BNIPL	down
IMPDH2	13897.9	0.907697	0.100434	9.03775	1.6e-19	3.8e-18	IMPDH2	no
RPS2P5	2902.42	1.07993	0.119491	9.03778	1.6e-19	3.8e-18	RPS2P5	up
NOC2L	5023.99	0.490909	0.0543255	9.03644	1.62e-19	3.84e-18	NOC2L	no
KIFC1	328.883	1.37956	0.152669	9.03624	1.62e-19	3.85e-18	KIFC1	up
KSR1	350.293	-1.21723	0.134709	-9.036	1.63e-19	3.85e-18	KSR1	down
IRAK3	376.288	-1.16481	0.128927	-9.03466	1.65e-19	3.9e-18	IRAK3	down
GAB1	978.738	-0.795832	0.0881021	-9.03306	1.67e-19	3.95e-18	GAB1	no
S100A14	350.874	-2.14994	0.238014	-9.03284	1.67e-19	3.96e-18	S100A14	down
FGL1	112.282	2.86021	0.316656	9.03255	1.68e-19	3.97e-18	FGL1	up
ITIH5	2236.44	-1.25787	0.139267	-9.03207	1.68e-19	3.98e-18	ITIH5	down
DDR2	2273.57	-1.25155	0.138578	-9.03135	1.7e-19	4.01e-18	DDR2	down
TRHDE	121.75	-1.72923	0.191476	-9.03109	1.7e-19	4.01e-18	TRHDE	down
LINC01238	180.186	1.43103	0.158461	9.0308	1.7e-19	4.02e-18	LINC01238	up
PLA2G7	3552.22	1.69929	0.18817	9.03061	1.71e-19	4.03e-18	PLA2G7	up
LRRK2-DT	18.8088	-1.28761	0.142585	-9.03049	1.71e-19	4.03e-18	LRRK2-DT	down
SLC24A3	835.452	-1.20547	0.133498	-9.02984	1.72e-19	4.05e-18	SLC24A3	down
GJC1	667.21	-1.22789	0.135984	-9.02964	1.72e-19	4.05e-18	GJC1	down
AC011445.1	21.9141	1.73867	0.192564	9.02906	1.73e-19	4.07e-18	AC011445.1	up
MNX1-AS1	90.3972	2.32029	0.256992	9.02866	1.74e-19	4.08e-18	MNX1-AS1	up
TRGC2	2585.65	1.88356	0.208619	9.0287	1.74e-19	4.08e-18	TRGC2	up
C5orf38	512.358	1.0289	0.113968	9.02793	1.75e-19	4.11e-18	C5orf38	up
PYCR3	1876.14	0.961896	0.106552	9.0275	1.76e-19	4.12e-18	PYCR3	no
PLCD4	44.1291	-1.70232	0.188716	-9.02055	1.87e-19	4.39e-18	PLCD4	down
CAPG	2488.34	-1.26061	0.13975	-9.02044	1.87e-19	4.39e-18	CAPG	down
KRT18P8	8.28372	1.95114	0.216322	9.01961	1.89e-19	4.42e-18	KRT18P8	up
PHLDB3	2053.41	0.765167	0.0848446	9.01846	1.91e-19	4.47e-18	PHLDB3	no
AC007091.1	4.69201	3.97301	0.440594	9.01741	1.93e-19	4.51e-18	AC007091.1	up
MEIS1	940.274	-1.21479	0.134724	-9.01689	1.94e-19	4.53e-18	MEIS1	down
LINC00244	10.027	2.60525	0.288958	9.016	1.95e-19	4.56e-18	LINC00244	up
ASB2	841.124	-1.50325	0.166747	-9.01519	1.97e-19	4.59e-18	ASB2	down
AC133785.1	48.8912	1.76417	0.195728	9.01335	2e-19	4.67e-18	AC133785.1	up
ATP4B	2.38042	-2.30716	0.255989	-9.01275	2.01e-19	4.69e-18	ATP4B	down
BAIAP2L2	313.98	2.18115	0.242017	9.01237	2.02e-19	4.7e-18	BAIAP2L2	up
BRSK2	332.809	2.29052	0.254161	9.01209	2.02e-19	4.71e-18	BRSK2	up
DERA	785.191	-0.549916	0.0610201	-9.01206	2.02e-19	4.71e-18	DERA	no
ZMYND10	141.353	2.03793	0.22617	9.01062	2.05e-19	4.77e-18	ZMYND10	up
LY6D	52.8352	-3.26618	0.362496	-9.01024	2.06e-19	4.78e-18	LY6D	down
CLCA3P	0.956184	-2.90661	0.32263	-9.0091	2.08e-19	4.83e-18	CLCA3P	down
ZP1	79.7142	2.15128	0.238791	9.00904	2.08e-19	4.83e-18	ZP1	up
LINC01546	5.56835	-1.59199	0.176758	-9.00665	2.12e-19	4.93e-18	LINC01546	down
COQ6	462.394	0.584724	0.0649372	9.00446	2.17e-19	5.03e-18	COQ6	no
CRHR2	10.6831	-1.74533	0.193834	-9.00426	2.17e-19	5.04e-18	CRHR2	down
ANKRD30A	35.9778	5.16433	0.573595	9.00345	2.19e-19	5.07e-18	ANKRD30A	up
TRPC3	14.5665	-1.63876	0.182015	-9.00343	2.19e-19	5.07e-18	TRPC3	down
AC021151.1	5.18966	4.17924	0.464217	9.00277	2.2e-19	5.1e-18	AC021151.1	up
SMIM10	306.565	-1.23647	0.137351	-9.00224	2.21e-19	5.12e-18	SMIM10	down
LGR6	276.746	-2.12547	0.236175	-8.99955	2.27e-19	5.24e-18	LGR6	down
NR3C1	2535.17	-0.918013	0.102037	-8.99683	2.32e-19	5.37e-18	NR3C1	no
AC026356.1	259.866	1.61317	0.17932	8.99601	2.34e-19	5.41e-18	AC026356.1	up
FILIP1	127.77	-1.60202	0.178112	-8.99443	2.37e-19	5.48e-18	FILIP1	down
EGFL6	29.1079	-1.9591	0.217827	-8.99382	2.39e-19	5.51e-18	EGFL6	down
P2RY11	161.963	0.827949	0.0920904	8.99061	2.46e-19	5.67e-18	P2RY11	no
GLYATL1	3526.33	1.79602	0.199777	8.99011	2.47e-19	5.69e-18	GLYATL1	up
AC092376.1	2.02839	-2.14901	0.239076	-8.98885	2.5e-19	5.76e-18	AC092376.1	down
FAT2	528.239	-1.90881	0.212364	-8.98842	2.51e-19	5.78e-18	FAT2	down
AC099518.1	53.3828	1.49439	0.166305	8.98581	2.57e-19	5.91e-18	AC099518.1	up
KISS1R	6.12892	3.28319	0.365382	8.98565	2.57e-19	5.92e-18	KISS1R	up
APBB1	1937.25	-0.828005	0.092178	-8.98267	2.64e-19	6.07e-18	APBB1	no
CYBC1	4215.15	0.641814	0.0714543	8.98217	2.65e-19	6.1e-18	CYBC1	no
BUB1B	151.375	1.41782	0.157857	8.98167	2.67e-19	6.12e-18	BUB1B	up
FEZ2	1623.15	-0.460747	0.0513076	-8.9801	2.71e-19	6.21e-18	FEZ2	no
SDK1	3805.1	1.67152	0.18616	8.97899	2.73e-19	6.27e-18	SDK1	up
P2RX2	93.8652	-1.86291	0.207485	-8.97854	2.74e-19	6.29e-18	P2RX2	down
ZFAS1	1315.36	1.20511	0.134222	8.97844	2.75e-19	6.29e-18	ZFAS1	up
ZNF850	285.818	0.953707	0.106221	8.97849	2.75e-19	6.29e-18	ZNF850	no
PGAP4	580.619	-1.49361	0.16641	-8.97543	2.82e-19	6.46e-18	PGAP4	down
AHDC1	1352.83	-0.685184	0.0763503	-8.97421	2.85e-19	6.53e-18	AHDC1	no
ZBTB7C	421.58	-1.39172	0.155095	-8.97335	2.88e-19	6.57e-18	ZBTB7C	down
EFHC2	117.128	-1.17142	0.13055	-8.97298	2.89e-19	6.59e-18	EFHC2	down
MSH5-SAPCD1	19.7785	1.68942	0.188283	8.97277	2.89e-19	6.6e-18	MSH5-SAPCD1	up
AL135786.1	3.12891	-1.32095	0.147225	-8.97233	2.9e-19	6.62e-18	AL135786.1	down
SELENOH	432.874	0.800144	0.0891902	8.97121	2.93e-19	6.69e-18	SELENOH	no
TMEM185A	590.925	-0.460112	0.0512923	-8.97038	2.95e-19	6.73e-18	TMEM185A	no
AC008060.1	4.78348	4.50227	0.502097	8.96694	3.05e-19	6.94e-18	AC008060.1	up
MLPH	20168.5	0.901311	0.100522	8.96632	3.07e-19	6.98e-18	MLPH	no
ANAPC5	7450.6	0.492865	0.0549698	8.9661	3.07e-19	6.99e-18	ANAPC5	no
HBB	435.437	-1.79989	0.200766	-8.9651	3.1e-19	7.05e-18	HBB	down
LINC02884	208.559	-1.40377	0.156622	-8.9628	3.17e-19	7.19e-18	LINC02884	down
HMGCLL1	58.4096	-1.98129	0.221126	-8.96001	3.25e-19	7.37e-18	HMGCLL1	down
HMGN1P7	11.0416	1.47029	0.164107	8.95934	3.27e-19	7.41e-18	HMGN1P7	up
DYNC1I1	328.451	-1.25886	0.140554	-8.95644	3.35e-19	7.61e-18	DYNC1I1	down
DHCR24-DT	20.7675	1.2971	0.144861	8.95409	3.43e-19	7.76e-18	DHCR24-DT	up
ZNF25	797.983	-0.520103	0.0580857	-8.95407	3.43e-19	7.76e-18	ZNF25	no
SPATA20P1	1.29399	-3.55764	0.397387	-8.95259	3.47e-19	7.86e-18	SPATA20P1	down
HSF4	1572.63	1.5264	0.170503	8.95233	3.48e-19	7.88e-18	HSF4	up
ALG6	916.153	0.629145	0.0702791	8.95209	3.49e-19	7.89e-18	ALG6	no
AC011472.2	36.6928	1.33079	0.148698	8.94967	3.57e-19	8.06e-18	AC011472.2	up
SPC24	174.164	1.47495	0.164828	8.9484	3.61e-19	8.15e-18	SPC24	up
PGF	323.81	-1.48252	0.16577	-8.94325	3.78e-19	8.53e-18	PGF	down
SLC51B	46.8023	-1.31831	0.147409	-8.94319	3.78e-19	8.53e-18	SLC51B	down
HDHD5	2641.12	0.55265	0.0618162	8.94021	3.88e-19	8.76e-18	HDHD5	no
SGCE	736.152	-1.06021	0.11859	-8.94016	3.89e-19	8.76e-18	SGCE	down
FKBP7	467.89	-0.634522	0.0709866	-8.93863	3.94e-19	8.88e-18	FKBP7	no
P2RY2	91.4857	-1.71292	0.191699	-8.93547	4.05e-19	9.13e-18	P2RY2	down
AC048341.2	34.6512	1.4927	0.167081	8.934	4.11e-19	9.24e-18	AC048341.2	up
AC084880.3	1.52088	-2.27113	0.254212	-8.93402	4.11e-19	9.24e-18	AC084880.3	down
H2BC19P	159.901	1.36958	0.153351	8.93101	4.22e-19	9.49e-18	H2BC19P	up
LINC00313	2.4544	-2.66989	0.299028	-8.92856	4.32e-19	9.7e-18	LINC00313	down
AC145285.6	29.2519	1.20287	0.134728	8.92815	4.33e-19	9.73e-18	AC145285.6	up
AL445933.1	61.4951	1.29168	0.144676	8.92812	4.33e-19	9.73e-18	AL445933.1	up
AL133346.1	3.20106	-1.72789	0.193544	-8.92765	4.35e-19	9.76e-18	AL133346.1	down
FEV	999.124	1.90233	0.213103	8.92682	4.38e-19	9.83e-18	FEV	up
MOB1A	5095.55	-0.465219	0.0521183	-8.92622	4.41e-19	9.88e-18	MOB1A	no
RPSAP1	19.7504	2.20259	0.246764	8.92589	4.42e-19	9.9e-18	RPSAP1	up
AC087294.1	35.4594	1.08572	0.121645	8.92535	4.44e-19	9.94e-18	AC087294.1	up
SLC25A10	940.596	1.26424	0.14166	8.92449	4.48e-19	1e-17	SLC25A10	up
AC003986.3	10.6122	3.2088	0.359572	8.92395	4.5e-19	1.01e-17	AC003986.3	up
LINC01089	950.689	1.3592	0.152309	8.92398	4.5e-19	1.01e-17	LINC01089	up
AC091544.4	57.8536	1.87021	0.209599	8.92278	4.55e-19	1.02e-17	AC091544.4	up
C3orf86	7.78221	-2.06574	0.231521	-8.92251	4.56e-19	1.02e-17	C3orf86	down
CDCA3	168.093	1.35737	0.15215	8.92125	4.61e-19	1.03e-17	CDCA3	up
USP11	3946.45	-0.51708	0.0579806	-8.91816	4.74e-19	1.06e-17	USP11	no
ZMAT3	1288.79	-0.730691	0.0819327	-8.91819	4.74e-19	1.06e-17	ZMAT3	no
PITPNM3	654.476	-1.09612	0.122938	-8.91603	4.83e-19	1.08e-17	PITPNM3	down
ACSS3	527.842	-1.27365	0.142873	-8.91456	4.9e-19	1.09e-17	ACSS3	down
PCGF5	2781.92	-0.597552	0.0670472	-8.91241	4.99e-19	1.11e-17	PCGF5	no
HACD4	359.272	-1.07118	0.120209	-8.91099	5.06e-19	1.12e-17	HACD4	down
GALNT6	182.438	-1.19188	0.133762	-8.91047	5.08e-19	1.13e-17	GALNT6	down
AC018413.1	30.5763	-1.32097	0.148263	-8.90962	5.12e-19	1.14e-17	AC018413.1	down
C3orf80	94.1057	1.14119	0.1281	8.90854	5.17e-19	1.15e-17	C3orf80	up
SNCG	767.309	-1.69482	0.190258	-8.90803	5.19e-19	1.15e-17	SNCG	down
EPOP	420.018	1.09526	0.122956	8.90778	5.21e-19	1.15e-17	EPOP	up
TMEM200B	475.975	-1.37335	0.154178	-8.90754	5.22e-19	1.16e-17	TMEM200B	down
CTF1	399.234	-1.31265	0.147372	-8.90704	5.24e-19	1.16e-17	CTF1	down
RNF2P1	4.80601	3.12093	0.350504	8.90413	5.38e-19	1.19e-17	RNF2P1	up
DOT1L	1282.04	0.626148	0.0703409	8.90162	5.5e-19	1.22e-17	DOT1L	no
AC012618.1	13.6535	1.86124	0.209165	8.89844	5.66e-19	1.25e-17	AC012618.1	up
DOC2GP	64.5647	2.02878	0.227995	8.89837	5.67e-19	1.25e-17	DOC2GP	up
IQCA1	85.1047	-1.36222	0.153086	-8.89842	5.66e-19	1.25e-17	IQCA1	down
AC110048.1	1.79752	-1.89104	0.212525	-8.89798	5.69e-19	1.25e-17	AC110048.1	down
LINC00842	63.2129	1.56605	0.175999	8.89804	5.68e-19	1.25e-17	LINC00842	up
AC007159.1	16.3982	3.91394	0.439954	8.89624	5.78e-19	1.27e-17	AC007159.1	up
PLXNA2	1107.89	-0.871686	0.097984	-8.8962	5.78e-19	1.27e-17	PLXNA2	no
HOXC12	21.6883	4.49501	0.505422	8.89357	5.92e-19	1.3e-17	HOXC12	up
PPM1L	1053.08	-0.937801	0.105455	-8.89291	5.95e-19	1.31e-17	PPM1L	no
SLC10A5	75.9807	1.51077	0.169884	8.89294	5.95e-19	1.31e-17	SLC10A5	up
PHF21B	423.169	1.38915	0.156213	8.89265	5.97e-19	1.31e-17	PHF21B	up
GABRD	52.4338	1.83671	0.20655	8.89232	5.98e-19	1.32e-17	GABRD	up
KRTAP5-1	20.8698	2.02746	0.228028	8.89126	6.04e-19	1.33e-17	KRTAP5-1	up
SNHG19	2849.72	1.51846	0.170793	8.89065	6.08e-19	1.33e-17	SNHG19	up
ENO2	945.177	-1.0035	0.112908	-8.88775	6.24e-19	1.37e-17	ENO2	down
GLIS1	239.075	-1.56289	0.175883	-8.88595	6.34e-19	1.39e-17	GLIS1	down
SGPP2	639.202	-1.55813	0.175378	-8.88439	6.43e-19	1.41e-17	SGPP2	down
MAPK8IP2	1127.58	1.28952	0.145168	8.88294	6.51e-19	1.43e-17	MAPK8IP2	up
AC009831.1	35.5926	0.958816	0.107947	8.88227	6.55e-19	1.43e-17	AC009831.1	no
SRSF6	8983.63	0.510548	0.0574795	8.88227	6.55e-19	1.43e-17	SRSF6	no
ZFP36L1	14649.8	-0.987502	0.111177	-8.88222	6.55e-19	1.43e-17	ZFP36L1	no
SFXN4	2002.17	0.761539	0.0857448	8.88147	6.6e-19	1.44e-17	SFXN4	no
AC079298.3	24.2299	-1.63304	0.183904	-8.87983	6.7e-19	1.46e-17	AC079298.3	down
AC024267.5	15.2388	1.9626	0.221035	8.87913	6.74e-19	1.47e-17	AC024267.5	up
CRACR2B	4542.63	1.29828	0.146239	8.87783	6.82e-19	1.49e-17	CRACR2B	up
TGM5	21.8875	-2.10306	0.236904	-8.87729	6.85e-19	1.49e-17	TGM5	down
AL136366.1	12.9083	-1.39356	0.157012	-8.87549	6.96e-19	1.52e-17	AL136366.1	down
PRDM12	8.61516	1.88514	0.2124	8.87545	6.97e-19	1.52e-17	PRDM12	up
LINC01866	13.8986	3.95068	0.445249	8.87298	7.12e-19	1.55e-17	LINC01866	up
ATRNL1	261.176	-1.69677	0.191262	-8.87141	7.22e-19	1.57e-17	ATRNL1	down
QSOX1	4862.66	-1.04783	0.118116	-8.87117	7.24e-19	1.57e-17	QSOX1	down
NEXN	2048.54	-1.40588	0.158525	-8.86851	7.41e-19	1.61e-17	NEXN	down
CSKMT	345.547	0.852635	0.0961508	8.86769	7.47e-19	1.62e-17	CSKMT	no
CPED1	1591.87	-1.43417	0.161763	-8.86587	7.59e-19	1.65e-17	CPED1	down
SEPHS1P6	5.32048	-1.4758	0.16646	-8.8658	7.6e-19	1.65e-17	SEPHS1P6	down
ARHGEF17	2697.86	-0.842207	0.0950117	-8.86425	7.7e-19	1.67e-17	ARHGEF17	no
LRGUK	57.3531	1.25977	0.142136	8.86314	7.78e-19	1.69e-17	LRGUK	up
CCDC28A-AS1	63.2676	1.04024	0.117389	8.86152	7.89e-19	1.71e-17	CCDC28A-AS1	up
MAGI2	807.553	-0.815805	0.0920609	-8.86158	7.89e-19	1.71e-17	MAGI2	no
HEPH	1111.57	-1.27849	0.144342	-8.85737	8.19e-19	1.77e-17	HEPH	down
CCDC110	251.097	1.01924	0.115079	8.85688	8.23e-19	1.78e-17	CCDC110	up
FAM53A	101.797	0.85871	0.0969553	8.85676	8.24e-19	1.78e-17	FAM53A	no
MFSD3	2751.42	1.04995	0.118567	8.85537	8.34e-19	1.8e-17	MFSD3	up
FO393414.3	3.90375	-1.66403	0.18792	-8.855	8.37e-19	1.81e-17	FO393414.3	down
ZNF488	23.1798	-1.73097	0.195481	-8.85497	8.37e-19	1.81e-17	ZNF488	down
AC092535.2	14.8316	2.1214	0.239584	8.85454	8.4e-19	1.81e-17	AC092535.2	up
POLN	106.724	1.25688	0.14199	8.85193	8.6e-19	1.85e-17	POLN	up
AC068057.1	2.04454	-2.77327	0.313343	-8.85059	8.71e-19	1.88e-17	AC068057.1	down
ALDH1A3	13268.4	1.13331	0.128051	8.85046	8.72e-19	1.88e-17	ALDH1A3	up
FZD7	1852.59	-1.03575	0.117044	-8.84922	8.81e-19	1.9e-17	FZD7	down
SFPQ	14672.8	0.403976	0.045652	8.84904	8.83e-19	1.9e-17	SFPQ	no
C3orf18	440.956	-0.797705	0.0901619	-8.84747	8.95e-19	1.92e-17	C3orf18	no
TRIM11	1451.19	0.611478	0.0691132	8.84749	8.95e-19	1.92e-17	TRIM11	no
COL9A2	13433.3	2.21216	0.250104	8.84496	9.16e-19	1.97e-17	COL9A2	up
DNM3	140.15	-0.857552	0.0969531	-8.84502	9.15e-19	1.97e-17	DNM3	no
MAK	119.808	1.512	0.170946	8.84491	9.16e-19	1.97e-17	MAK	up
TSPAN1	53458.7	1.203	0.136019	8.84434	9.21e-19	1.97e-17	TSPAN1	up
LGALS8-AS1	20.9207	1.48086	0.167444	8.84393	9.24e-19	1.98e-17	LGALS8-AS1	up
AC004554.1	11.262	-1.64572	0.186108	-8.84282	9.33e-19	2e-17	AC004554.1	down
GRXCR1	17.7258	-7.44687	0.84222	-8.84195	9.41e-19	2.01e-17	GRXCR1	down
ANXA2	12791.6	-1.04303	0.117966	-8.84179	9.42e-19	2.02e-17	ANXA2	down
CAPZA2	5128.98	-0.512722	0.0579892	-8.84169	9.43e-19	2.02e-17	CAPZA2	no
MRPL41	4698.19	1.15301	0.130405	8.84175	9.42e-19	2.02e-17	MRPL41	up
ELFN1-AS1	105.216	3.73059	0.421938	8.84155	9.44e-19	2.02e-17	ELFN1-AS1	up
NOTCH1	2468.79	-0.914253	0.103413	-8.84083	9.5e-19	2.03e-17	NOTCH1	no
LRRC34	48.4206	-0.871627	0.0986145	-8.83873	9.68e-19	2.07e-17	LRRC34	no
ACTG2	61822.3	-1.72235	0.194871	-8.83842	9.71e-19	2.07e-17	ACTG2	down
TBC1D2	850.355	-0.837947	0.0948224	-8.83701	9.83e-19	2.1e-17	TBC1D2	no
ITGA3	3683	-0.89958	0.101798	-8.83691	9.84e-19	2.1e-17	ITGA3	no
FAM83B	100.279	-2.05911	0.233021	-8.8366	9.87e-19	2.1e-17	FAM83B	down
TONSL	676.984	0.855432	0.0968165	8.83561	9.96e-19	2.12e-17	TONSL	no
PLCB1	1441.83	-0.837616	0.0948081	-8.83486	1e-18	2.13e-17	PLCB1	no
ZNF419	556.81	0.600728	0.0679975	8.83456	1e-18	2.14e-17	ZNF419	no
AC006504.7	105.573	0.935561	0.105913	8.83333	1.02e-18	2.16e-17	AC006504.7	no
MDM1	512.932	-0.48925	0.0553915	-8.83258	1.02e-18	2.17e-17	MDM1	no
ROBO1	2197.99	-1.17793	0.133406	-8.82966	1.05e-18	2.23e-17	ROBO1	down
LINC01679	75.7261	-1.40827	0.159531	-8.82754	1.07e-18	2.27e-17	LINC01679	down
MRPL12	501.776	1.42731	0.16169	8.82746	1.07e-18	2.27e-17	MRPL12	up
LPCAT1	3346.31	0.693825	0.0786091	8.82627	1.08e-18	2.29e-17	LPCAT1	no
FGFR1	3827.55	-0.916956	0.103899	-8.82543	1.09e-18	2.31e-17	FGFR1	no
SORBS2	5502.07	-0.756462	0.0857244	-8.82434	1.1e-18	2.33e-17	SORBS2	no
KLF5	2466.34	-1.21474	0.137672	-8.82343	1.11e-18	2.35e-17	KLF5	down
CAMSAP3	3638.13	0.701614	0.0795187	8.82326	1.11e-18	2.35e-17	CAMSAP3	no
LZTFL1	891.405	-0.58428	0.0662211	-8.82317	1.11e-18	2.35e-17	LZTFL1	no
AC110285.6	42.4039	2.01827	0.228784	8.82174	1.13e-18	2.38e-17	AC110285.6	up
CARD6	158.594	-1.08862	0.123452	-8.81819	1.16e-18	2.46e-17	CARD6	down
CREBRF	1846.72	-0.658966	0.0747431	-8.81641	1.18e-18	2.49e-17	CREBRF	no
AC008870.2	33.0249	1.19193	0.13521	8.81541	1.19e-18	2.52e-17	AC008870.2	up
MNX1-AS2	34.2808	2.4839	0.281793	8.81463	1.2e-18	2.53e-17	MNX1-AS2	up
ACTC1	1270.67	-2.70559	0.306953	-8.81435	1.2e-18	2.54e-17	ACTC1	down
FBP2	17.4926	-2.08577	0.236638	-8.81417	1.21e-18	2.54e-17	FBP2	down
RBM38	1183.93	-0.933622	0.105939	-8.8128	1.22e-18	2.57e-17	RBM38	no
CERS3	31.1033	-1.87539	0.212831	-8.81164	1.23e-18	2.6e-17	CERS3	down
DAZAP1	4772.62	0.470774	0.0534286	8.81128	1.24e-18	2.6e-17	DAZAP1	no
AP003419.3	30.7738	1.77728	0.201746	8.80948	1.26e-18	2.64e-17	AP003419.3	up
LINC02078	6.1973	-1.67129	0.189751	-8.80778	1.28e-18	2.68e-17	LINC02078	down
AC096992.2	94.3894	0.691456	0.0785087	8.80738	1.28e-18	2.69e-17	AC096992.2	no
AC092078.2	1.71172	-4.19353	0.476176	-8.80668	1.29e-18	2.71e-17	AC092078.2	down
RAP2C-AS1	79.7637	-0.859311	0.0975794	-8.80627	1.29e-18	2.71e-17	RAP2C-AS1	no
PDGFC	1400.28	-1.06963	0.121465	-8.80607	1.3e-18	2.72e-17	PDGFC	down
AL365181.4	20.5242	-1.61654	0.183586	-8.80537	1.3e-18	2.73e-17	AL365181.4	down
TEX26	5.07121	-1.81276	0.205872	-8.80529	1.31e-18	2.73e-17	TEX26	down
AC005821.1	19.6338	1.86021	0.211269	8.80494	1.31e-18	2.74e-17	AC005821.1	up
GVQW3	309.216	0.94949	0.107841	8.80455	1.31e-18	2.75e-17	GVQW3	no
AC092811.1	1.67845	-1.83224	0.208137	-8.80304	1.33e-18	2.78e-17	AC092811.1	down
PIGW	489.34	0.700045	0.0795255	8.80278	1.33e-18	2.79e-17	PIGW	no
AC105398.1	1.38744	-2.1599	0.245403	-8.80144	1.35e-18	2.82e-17	AC105398.1	down
NOP56	4784.42	0.49251	0.0559864	8.79697	1.41e-18	2.93e-17	NOP56	no
SLC39A1	58.4461	0.779545	0.0886286	8.79564	1.42e-18	2.97e-17	SLC39A1	no
HPCAL4	17.9788	-2.05729	0.233906	-8.79536	1.43e-18	2.97e-17	HPCAL4	down
AC004947.1	253.992	2.69272	0.306164	8.79503	1.43e-18	2.98e-17	AC004947.1	up
TRH	3.89646	-3.13654	0.35664	-8.79469	1.43e-18	2.99e-17	TRH	down
MKI67	972.284	1.48586	0.168959	8.79423	1.44e-18	3e-17	MKI67	up
AC010809.2	12.9914	1.33052	0.151309	8.79336	1.45e-18	3.02e-17	AC010809.2	up
LRP4	436.289	-1.13088	0.128615	-8.7927	1.46e-18	3.04e-17	LRP4	down
TGFB1I1	2606.34	-1.32842	0.151092	-8.79209	1.47e-18	3.05e-17	TGFB1I1	down
KRT20	23.0671	3.02122	0.343664	8.79119	1.48e-18	3.08e-17	KRT20	up
COL17A1	1556.96	-1.94001	0.220707	-8.78999	1.5e-18	3.11e-17	COL17A1	down
HCG22	2.69802	-3.20857	0.365027	-8.78995	1.5e-18	3.11e-17	HCG22	down
LINC01694	30.2835	2.19509	0.249753	8.78901	1.51e-18	3.13e-17	LINC01694	up
AC074117.1	241.734	0.73682	0.0838395	8.78846	1.52e-18	3.14e-17	AC074117.1	no
CAP1	11154.2	-0.346049	0.0393836	-8.78663	1.54e-18	3.19e-17	CAP1	no
AC010336.7	14.9094	1.3265	0.150999	8.78479	1.57e-18	3.25e-17	AC010336.7	up
HCG25	56.7553	0.982016	0.111793	8.78421	1.57e-18	3.26e-17	HCG25	no
COLEC12	5020.74	1.13289	0.128976	8.78369	1.58e-18	3.27e-17	COLEC12	up
AP1S2	860.549	-0.742806	0.0845705	-8.78327	1.59e-18	3.28e-17	AP1S2	no
AC084880.1	58.7863	-1.54051	0.175393	-8.7832	1.59e-18	3.28e-17	AC084880.1	down
DHPS	130.833	1.34451	0.153093	8.7823	1.6e-18	3.31e-17	DHPS	up
CYP4A22-AS1	10.749	1.54789	0.176277	8.78103	1.62e-18	3.35e-17	CYP4A22-AS1	up
ERC1	2865.37	-0.687284	0.0782767	-8.78019	1.63e-18	3.37e-17	ERC1	no
AC004846.1	32.4103	-1.27748	0.145499	-8.78	1.63e-18	3.37e-17	AC004846.1	down
AL160412.1	16.2631	-1.88668	0.214884	-8.77999	1.63e-18	3.37e-17	AL160412.1	down
ANO5	383.686	-1.53978	0.175372	-8.78007	1.63e-18	3.37e-17	ANO5	down
AC093484.4	16.0842	1.57434	0.179326	8.7792	1.65e-18	3.39e-17	AC093484.4	up
LINC02724	160.163	1.69077	0.192621	8.77768	1.67e-18	3.44e-17	LINC02724	up
ARFGEF3	17750.2	1.10962	0.126432	8.7764	1.69e-18	3.47e-17	ARFGEF3	up
PLAC8L1	19.8601	1.41448	0.161172	8.77623	1.69e-18	3.48e-17	PLAC8L1	up
CPAMD8	2832.06	-1.30936	0.149215	-8.77501	1.71e-18	3.51e-17	CPAMD8	down
TRIB1	12820.9	1.38279	0.157599	8.77415	1.72e-18	3.54e-17	TRIB1	up
LIPE	185.774	-0.971897	0.110788	-8.7726	1.75e-18	3.59e-17	LIPE	no
RIPPLY1	3.51803	-1.67246	0.190675	-8.77127	1.77e-18	3.63e-17	RIPPLY1	down
BTN1A1	3.77612	-2.15467	0.24569	-8.76986	1.79e-18	3.67e-17	BTN1A1	down
STK33	171.732	-1.2802	0.145978	-8.76982	1.79e-18	3.67e-17	STK33	down
AC103591.4	22.2918	-1.12611	0.128411	-8.7696	1.79e-18	3.67e-17	AC103591.4	down
LINC01623	16.024	3.23855	0.36937	8.76777	1.82e-18	3.73e-17	LINC01623	up
CCNB2	356.717	1.22704	0.13995	8.76766	1.82e-18	3.73e-17	CCNB2	up
SFXN3	1144.06	-0.876165	0.0999407	-8.76685	1.84e-18	3.76e-17	SFXN3	no
AC010913.1	19.0056	1.6269	0.18559	8.76608	1.85e-18	3.78e-17	AC010913.1	up
PRRT3-AS1	106.196	1.4381	0.164061	8.76568	1.86e-18	3.79e-17	PRRT3-AS1	up
TUBB2A	2017.35	1.3256	0.151226	8.76566	1.86e-18	3.79e-17	TUBB2A	up
KLHL21	3258.95	-0.59175	0.0675178	-8.76435	1.88e-18	3.84e-17	KLHL21	no
AL590714.1	13.5854	1.1557	0.131879	8.76333	1.9e-18	3.87e-17	AL590714.1	up
VIPAS39	1094.84	-0.325774	0.0371768	-8.76283	1.9e-18	3.88e-17	VIPAS39	no
SLITRK3	77.1872	-2.38891	0.272647	-8.7619	1.92e-18	3.91e-17	SLITRK3	down
CCDC158	37.8058	-1.1166	0.127457	-8.7606	1.94e-18	3.96e-17	CCDC158	down
TCEAL7	170.551	-1.2752	0.145572	-8.7599	1.95e-18	3.98e-17	TCEAL7	down
ARHGAP10	1368.94	-0.918387	0.104876	-8.75687	2.01e-18	4.09e-17	ARHGAP10	no
OR7E14P	107.412	0.880541	0.100587	8.75407	2.06e-18	4.19e-17	OR7E14P	no
AC008105.2	135.177	1.24974	0.142775	8.75317	2.07e-18	4.22e-17	AC008105.2	up
NLGN3	443.322	-1.28602	0.146974	-8.74997	2.13e-18	4.34e-17	NLGN3	down
LRCH2	530.072	-1.35402	0.154761	-8.74909	2.15e-18	4.37e-17	LRCH2	down
QTRT1	2759.61	0.887582	0.101449	8.74905	2.15e-18	4.37e-17	QTRT1	no
PEX3	723.18	-0.46783	0.0534763	-8.74837	2.16e-18	4.39e-17	PEX3	no
WDFY2	583.599	-0.69916	0.0799318	-8.74695	2.19e-18	4.45e-17	WDFY2	no
IRAG1	3167.05	-1.33569	0.152714	-8.74633	2.2e-18	4.47e-17	IRAG1	down
PAK5	38.3467	-1.78124	0.203678	-8.74537	2.22e-18	4.5e-17	PAK5	down
AC011247.2	3.94447	-1.60199	0.183192	-8.74486	2.23e-18	4.52e-17	AC011247.2	down
PIMREG	98.3401	1.52084	0.173941	8.74343	2.26e-18	4.58e-17	PIMREG	up
TTC33	938.003	-0.514069	0.0588006	-8.74257	2.28e-18	4.61e-17	TTC33	no
P4HTM	3993.01	0.575198	0.0657993	8.7417	2.3e-18	4.64e-17	P4HTM	no
AL157932.1	4.65656	-1.21411	0.138894	-8.74131	2.3e-18	4.66e-17	AL157932.1	down
RGN	317.077	-1.28081	0.146539	-8.74042	2.32e-18	4.69e-17	RGN	down
SLC25A27	873.25	1.26037	0.144219	8.73927	2.35e-18	4.74e-17	SLC25A27	up
ATP6V1G1	15424.6	0.649012	0.0742872	8.73653	2.4e-18	4.85e-17	ATP6V1G1	no
ACTB	172233	-0.62854	0.0719446	-8.73644	2.41e-18	4.85e-17	ACTB	no
XYLB	408.857	0.761732	0.087207	8.73476	2.44e-18	4.92e-17	XYLB	no
CD200	450.924	-1.2493	0.143061	-8.73262	2.49e-18	5.02e-17	CD200	down
RGS7BP	199.917	-1.57842	0.180804	-8.73001	2.55e-18	5.13e-17	RGS7BP	down
FOXO1	1095.63	-0.699417	0.0801322	-8.72829	2.59e-18	5.21e-17	FOXO1	no
KCNJ13	6.63635	-2.7247	0.312186	-8.72781	2.6e-18	5.23e-17	KCNJ13	down
ATOH1	70.6344	3.88063	0.444678	8.72684	2.62e-18	5.27e-17	ATOH1	up
GBP6	11.0142	-1.78489	0.204605	-8.72358	2.7e-18	5.42e-17	GBP6	down
NR3C2	622.295	-0.823396	0.0943911	-8.72324	2.7e-18	5.43e-17	NR3C2	no
OR51S1	6.30017	3.35629	0.384785	8.72251	2.72e-18	5.46e-17	OR51S1	up
ZNF577	1233.62	0.821313	0.0941602	8.72251	2.72e-18	5.46e-17	ZNF577	no
PTP4A3	6289.86	1.42077	0.162899	8.72178	2.74e-18	5.49e-17	PTP4A3	up
NMRAL1	4702.62	0.80289	0.0920586	8.72151	2.75e-18	5.5e-17	NMRAL1	no
[truncated: 38,088 more rows]
