# Supplementary material for: A diagnosis model for prostate adenocarcinoma based on hub genes targeted by sulforaphane
Source: Research Square preprint supplement (doi:10.21203/rs.3.rs-7993444/v1), 2025-12-12
Supplement: Supplementary file 8 [file 98a2bf355e13437d79826828.xlsx]

## Sheet: SFNRDEGs
Genes
ERG
GSTM1
MME
TOP2A
CRYAB
SNAI2
HOXC6
PPARGC1A
OLFM4
LAMB3
CAPG
TRIM29
ACTC1
COL4A6
SLC2A5
TMC5
FOXQ1
