# Supplementary material for: A diagnosis model for prostate adenocarcinoma based on hub genes targeted by sulforaphane
Source: Research Square preprint supplement (doi:10.21203/rs.3.rs-7993444/v1), 2025-12-12
Supplement: Supplementary file 9 [file b129b334757251a5f0c15e3b.xlsx]

## Sheet: Sheet2
PRADRGs
AR
PTEN
BRCA2
CHEK2
APC
MSMB
SPOP
CDH1
MXI1
HOXB13
CTNNB1
FGFR4
KRAS
CCND1
TGFBR2
NKX3-1
SRD5A1
PCAT1
KLF6
EPHB2
KLK3
NBN
PIK3CA
RNASEL
BRCA1
HNF1B
TP53
ZFHX3
SLC22A3
CTBP2
RFX6
LDAH
FOXP4
LMTK2
PALB2
EHBP1
FGF10
POLK
NAT2
CDKN1A
CDKN1B
NDRG1
VAV3
AGR2
CENPF
IL24
CHD1
CLU
COMT
CREBBP
PARP1
DAB2IP
CYP1A1
CYP1B1
CYP3A4
CYP17A1
CYP19A1
ACE
NQO1
DNMT1
DNMT3B
EGF
EGFR
EGR1
AHR
ERBB2
ERCC2
AKT1
ERG
ESR1
ESR2
ETV1
ETV4
EZH2
FGF2
FOXO1
SIRT1
FOLH1
BRD4
AMACR
GJA1
SETD2
NR3C1
GRPR
GSK3B
GSTM1
GSTP1
GSTT1
HIF1A
HMOX1
FOXA1
HPN
APEX1
HSD3B1
IGF1
IGFBP3
IL6
CXCL8
IL10
GSTK1
KLK2
LEP
MIR21
EPCAM
MDM2
MET
MLH1
MME
MMP9
MSR1
MTHFR
MYC
ATM
NFE2L2
NOS3
OGG1
SERPINE1
PAWR
PIK3CB
PIK3CD
PLAU
CCHCR1
RNF43
MAPK3
PTGS2
PTHLH
BCL2
ELAC2
BGLAP
CXCL12
SHBG
SLC5A5
SOD2
SOX2
SPINK1
SRD5A2
ST14
STAT3
AURKA
TERT
TGFB1
TLR4
TMPRSS2
TPD52
UGT2B15
UGT2B17
VDR
VEGFA
VIM
VIP
XRCC1
CALCA
PSCA
CALR
NCOA3
MAD1L1
CASP9
CAV1
AKR1C3
TNFSF10
MBD2
CCND2
ZBED1
GDF15
CAMKK2
CTSB
CYP3A5
ETV5
TMEFF2
ANXA1
ICAM1
IL18
JAK2
EAF2
AZGP1
NCOA1
SCHLAP1
NCOA2
JAZF1
HOXD3
SERPINF1
PML
SELENOP
TGFA
NRP1
IL27
SLC39A1
HSD17B3
IDH1
IGFBP7
IL2
KMT2A
MPO
TRPM4
DCAF6
PRKDC
BAX
CYP3A43
BMP7
ADAM9
ERBB3
NEAT1
GPX3
HSD3B2
STMN1
PON1
PPARA
PAK6
BRAF
TOP2A
HMGN5
UXT
NAT1
TLR6
ADRB2
ALOX5
KLK5
IRS1
ATF3
NGFR
PIK3R1
TET2
SULT1E1
SULT2A1
TPT1
DDR1
CD276
EIF3H
TNFRSF10A
GREB1
ABCC4
TXNRD2
SERPINA3
CTSD
CYP2E1
DEFB1
LPAR1
EPHX1
FHIT
EHF
GHR
GNMT
AOX1
LPL
MIR106A
MMP13
MRE11
MSH3
MT2A
NUCB2
ZBTB7A
PIK3R2
ADI1
PRKCZ
RB1
RRAS
CX3CL1
SMARCA1
SPOCK1
SSX2
SULT1A1
PRDX2
EZR
XPO1
USP7
STEAP4
RUNX1
MED12
HDAC6
CDK2AP2
BAZ2A
LZTS1
CLDN3
CLDN7
DAG1
GADD45A
FOXC1
ABO
GSTA1
GSTM3
ANXA3
BIRC5
IGF2R
FASLG
IL16
LIFR
MAP3K1
MIF
PDHA1
CDK12
PLAUR
PODXL
B2M
VPS52
SLC7A1
MAP3K7
VCP
KMT2D
H4C8
IL17RC
ONECUT2
MYBBP1A
WASF3
STARD3
CSRP1
CREB3L4
EMP1
ACSL4
FBLN1
GCNT1
GGT1
PDIA3
HMGB2
HPGD
HSD17B1
HSPA1A
IL1RN
ITPR1
JAK1
ARG2
LAMC1
LDHB
LRP2
MBD1
MUC4
PCDH8
PDE4D
PENK
PMS1
ATR
IL17RD
PPP2R2A
PARD3
BAD
PVR
RAD23B
RAG1
RLN2
KLKP1
BNIP3
TERC
TIMP4
KDM6A
ZIC2
ZBTB16
TBL1XR1
TXNDC5
CAPNS1
PPFIBP2
EIF3A
ALDH1A2
CCNH
CYP7B1
LITAF
BCAR1
NCOR1
SETDB1
CDH13
SPON2
PGRMC1
ADAM28
RALBP1
CBX1
AKAP13
SLC31A1
CRYAB
CST6
CYP2C19
ALAD
ETV3
EWSR1
SPEN
SF3B1
SSBP2
GALNT3
SENP6
PHGDH
ABR
EFEMP2
ANXA4
HNRNPH1
HRAS
ID3
IGFBP6
ITGB3
M6PR
MTAP
PAX6
IRAK4
DCXR
LRP1B
CASZ1
PPL
NOL8
ATAD3A
PPP3CA
EIF2AK2
PRSS8
PTPRC
PTPRK
NECTIN2
ARID4A
ALOXE3
ROBO1
RPL10
RPS19
RXRA
ABCG5
BMPR1B
SULT2B1
TAP1
TMF1
TRAF1
WNT10B
EPS8L3
ARHGEF5
BAP1
USO1
MBTPS1
CBR1
MACIR
CD9
HERPUD1
CDC27
TOM1L1
CDH12
PDZK1IP1
PATJ
OLFM1
FBLN5
IVNS1ABP
CELF2
STARD10
KDELR1
SERINC3
ERP29
SPINK5
CHD3
ADAMTS8
PKP3
CHST14
TIRAP
ANTXR2
TPP1
PAQR4
CNN3
COL5A1
COL15A1
SPATA18
NCOA7
ASZ1
TAF1L
SESN3
CST1
PYHIN1
IGSF5
CYP2A6
CYP2C18
CYP11B2
DNASE1L2
EHHADH
ARID2
UNC13D
EMP3
ERF
FGFR2
DHX30
ZNF292
ERP44
FAF2
ARL6IP1
JMJD6
PDS5A
RPRD2
MGA
JADE2
AHCYL2
SDF2L1
ALOX12B
CIZ1
CLIC4
ZBTB20
LCE2B
PLEK2
TJP3
TNFRSF21
DHDH
GNG5
GOLGA4
TTC9C
RGMB
GRB7
KLF15
THYN1
PSMC3IP
HBG1
HBG2
FOXA3
HOXB9
HSP90AB1
IL6ST
INS
JUP
SP5
LAMB2
MC2R
ACHE
MMP7
MYCL
NAGLU
NFIC
CNOT3
NPPA
NPR3
P4HB
NOX3
COL5A3
ITSN2
CRYL1
RLIM
PIGP
WAC
PTRH2
RASD1
SLC26A4
PDZK1
PGAM2
SERPINB10
PITX3
RAB4B
PRRX1
ATP7B
WNT4
HAO1
DNAJC10
PDP1
SAMD9
ACP3
RNF31
APPL2
RFK
TBC1D2
STAB2
NAGK
CHD7
PRKACB
RNF130
SELENOS
ASH1L
DNAJC3
PRNP
DIABLO
TCEAL7
SMARCAD1
NIPAL3
USP28
KMT2C
ENPP5
RNASE4
ROBO2
RPL11
RPL12
RPN2
ACSM3
SIL1
ITSN1
NDST4
SLC4A2
SLC12A2
SSR2
ZFP36L2
SURF4
TBXAS1
TBX3
TCN2
TCP1
THBS1
TLR5
TMOD1
TMSB4X
TPBG
TPD52L1
HSP90B1
TST
TYMS
U2AF1
UCP3
UCK2
UMPS
ZFAND5
BRPF1
MYH14
GSTCD
KAT6A
AAAS
CLPTM1L
ARID1A
PCDH11Y
H2BC8
GUCD1
CHD6
ACRBP
CUL3
NDST2
BCAS1
DEGS1
CAV2
TP63
B4GALT4
MATN4
CREG1
CPNE3
ZNF160
CLDN9
ZMYM3
INTS4
FBXO44
GRHPR
GSTO1
EI24
KEAP1
REC8
IGF1R
PDGFRB
MKI67
STX4
CASP6
CASP8
KLK15
RAD51
MDM4
PRNCR1
MYO6
SRA1
STAT6
TCF7L2
GLB1
POU5F1B
RASA1
SPINT2
RGS17
CDKN2B-AS1
PDLIM5
PLCL1
BRIP1
PHLPP2
KRT8
PRKCI
MAP2K1
EMSY
PCAT19
RAD50
F13A1
ZNF652
MUTYH
NAB2
RAD51B
MLPH
MARCHF8
FSHR
SUN2
HLA-B
NEDD9
TCF4
CCAT2
TNRC6B
GREM1
ABCC6
LSAMP
CTNNBL1
THADA
BMPR1A
ZGPAT
TSPOAP1-AS1
DNAH5
DNM2
LARP4B
NAALADL2
GSR
INCENP
LAMB1
MIR4435-2HG
RPGR
SIX1
ADGRG1
CD24
TMED7-TICAM2
ANKRD44-IT1
LINC01496
CDKN2A
CASC19
CRISP3
YAP1
CIB1
ZNRD2
AHSA1
KHDRBS1
CXCR6
DCTN6
MTCO2P12
FERMT2
GLIPR1
CHGA
RASSF1
FAM83F
H3P23
H3P10
COL11A2
SLCO6A1
CRK
CRP
MAPK14
CSF2
ADRA1A
CTAG1B
ADRA2B
CBLL2
CYP24A1
CYP27B1
CFAP161
DHCR24
AFM
DPT
E2F1
EDN1
EDNRA
EIF4E
ELAVL2
EN2
AKT2
ETS1
PTK2B
FASN
GPRC6A
FGF8
FGFR1
FOXM1
FOXO3
FN1
TRAM1
FOS
FOSB
ALOX15
CTAG1A
MTOR
ZBTB38
GABPA
SPDEF
ARIH1
PART1
RNF19A
POLDIP2
GATA2
GATA3
STEAP1
GHRH
DKK3
HPGDS
GLI1
GNRH1
GPR42
GPX1
FLVCR1
PYCARD
CD274
GRM7
GRP
GSTM2
MSH6
GRHL1
SENP1
RMC1
PSAT1
ANXA2
HARS1
HDAC1
HGF
HMGB1
HSPA4
HSPA5
XIAP
HSPB1
HSPB2
HSP90AA1
IFI27
IFNG
PWAR4
IGF2
APRT
TICAM2
IK
IL1B
IL4
SHROOM2
JUN
JUNB
CD82
KCNN3
MALAT1
KDR
LGALS3
LMNA
MIR141
MIR143
MIR145
MIR146A
MIR17
MIR182
MIR183
MIR195
MIR200C
MIR203A
MIR204
MIR205
MIR221
MIR224
MIR30D
MIR34A
SMAD4
STS
MAOA
MCAM
MCL1
MFAP1
MGMT
MMP2
MMP3
MMP14
MRC1
MSH2
MST1
COX2
MUC1
MYCN
NFKB1
NOTCH1
YBX1
NTS
MIR375
TNFRSF11B
PEBP1
PCSK6
PCA3
PRKN
FOXP3
TMED7
PCNA
ABCB1
PIM1
PIK3CG
PITX2
PLAG1
PLK1
POU5F1
PPARG
SIDT1
PTPA
VPS53
TRPV6
PRKAA1
PAG1
PRKD1
MAPK1
MAPK8
PCDHGA2
PCDHGA1
PCDHA7
PCDHA6
PCDHA5
PCDHA4
PCDHA3
PCDHA2
PCDHA1
PRL
PROS1
SLC12A9
ACKR3
PCBP4
PSMD9
PTK2
CRACD
BARD1
PVT1
PXN
RAC1
RAD51C
RAD51D
RAF1
RARB
OPN1LW
RELA
ACTB
EEFSEC
S100A9
CCL2
PCGEM1
POU5F1P3
CSMD1
POU5F1P4
EBF2
GORASP1
BMI1
SKP2
WNK1
SLC2A1
SLC6A8
SNAI2
BOLL
SOX4
SOX9
SPARC
SPP1
SRC
SREBF1
SRF
SST
SSTR4
STAT5A
STAT5B
BRS3
BSG
SYT1
KLF5
ZEB1
TFF3
TIMP1
TNF
CASC8
TWIST1
CCR2
VEGFC
WNT5A
PCAP
CXCR4
CYREN
GGCT
TRPM8
FSD1
MUL1
AIMP2
CALCR
NCOA4
OR51E2
TRIM8
CASP3
FSD1L
ARMC2
CASR
CAT
CBX4
SLC45A3
RUNX2
TNFSF11
VAMP8
TNFRSF25
PROM1
NR1I2
HSPB3
F2RL3
SOCS3
MTA1
ANKRD44
LPAR2
DNER
KLF4
LONP1
ADIPOQ
GRAP2
MAGED1
NPEPPS
HPCX
CD44
CELSR1
KLK4
HDAC9
FARP2
BCL2L11
SH2B3
FRY
GATA2-AS1
PKN2-AS1
LINC01169
LINC02055
TRIM31
SLC52A3
C10orf90
DGKK
GDF7
NEK10
SPATA5
XAGE3
DOCK2
TOR1A
PLPP4
RMST
MECOM
RALY
KDM2A
TBC1D9
CAMTA1
TTC28
ADNP
ALOX12
GABRG3
SNED1
GBAP1
B3GAT1
ZMIZ1-AS1
RASSF3
TTC28-AS1
BABAM1
LINC00299
PKD1L3
DUBR
ITGB7
ITGB8
JUND
KCND3
KCNH1
AGMO
ARHGAP6
LINC01194
MIR15A
MIR96
LINC00595
MBNL1
MTX1
MYO9B
PAX9
WDPCP
KDM3B
PEX14
HAUS6
UHRF1BP1
SPATA6L
GOLPH3L
RNLS
PRKAA2
PRKAB1
CACNA2D3
KNL1
ATP10A
TTC7A
PTGFRN
FBRSL1
PTPRS
ATXN2
PKNOX2
MS4A5
TNS3
RFX7
SLCO2A1
ABCC8
TBX1
ZNF385D
SUGCT
MOB3B
ATAT1
MOB2
APOLD1
USHBP1
TUBA1C
TANC1
DYNLL1
SUCLG2
COL23A1
HTR3B
DLGAP2
NUMBL
CDK5
CKAP4
PSIP1
AZIN2
ETS2
F3
KDM1A
SMUG1
ANXA7
GADL1
IFNB1
LCN2
MIR193A
MIR31
ASAH1
MMP1
ODC1
PAEP
GDE1
MED15
PGR
PKM
PLA2G1B
PTOV1
ROS1
RPE65
S100A8
CCL5
MAP2K4
TGM4
TIMP2
UVRAG
YWHAZ
COL18A1
TNFRSF10B
INPP4B
CFLAR
SQSTM1
AURKB
MTDH
KDM4A
ADM
DKK1
CCN1
IL1A
ILK
MIR222
NGF
PLG
RARRES1
ROCK1
TGFB1I1
CDK2
KAT5
PLB1
DPYSL3
AGT
E2F3
EIF4EBP1
ELK1
FKBP4
GNRHR
HOXC6
IGFBP1
INSR
TACSTD2
MIR29A
MIR301A
MIR30C2
NTSR1
GOLM1
PHB
PIN1
PMS2
MAP2K7
BCR
SATB1
SDC1
SGK1
BMP2
BMP6
SP1
TIMP3
CCK
PTTG1
CDC6
LOX
MIR133B
CIP2A
TP73
PDGFD
GPRC5A
CBR3-AS1
CDH11
CDX2
POSTN
CTCF
PPARGC1A
KLK11
SLCO2B1
CTBP1
CTLA4
CTNND2
OXER1
DLX1
JAG1
ENO2
F2R
NUP62
STEAP2
SLCO1B3
CXCL1
GTF2H1
TBX21
HTC2
IGFBP2
FAS
IL15
LGALS1
MIRLET7C
MIR100
MIR185
MIR186
MIR200B
MIR210
MIR212
MIR23B
MIR27A
MIR30C1
MIR34B
HPC3
KLK14
CCN3
PDCD1
WWOX
TLR9
MIR449A
AXL
PMEPA1
CHPT1
MIB1
RAD9A
REN
BDNF
S100A4
SFRP1
STAT1
TGFB2
TLR3
XPC
NANOG
RUNX3
TNFRSF11A
CD151
CDK1
CDK4
FOLH1B
GC
CXCR2
KRT18
NME1
MAPK7
PSMA1
NDRG2
GAS5
SNAI1
NR2C2
TRAF6
POTEF
ARHGAP24
TMPRSS13
LMLN
HOTAIR
UBE2C
PRRT2
CHUK
CCR5
CCR7
CREB1
CSTA
CYP2B6
AKR1C2
TIMM8A
ATN1
DUSP1
AGTR1
EDNRB
ELK4
EPHA3
ERCC5
ESRRB
ALDH1A1
FABP5
FGF7
FGFR3
PEG10
FLT4
SEC14L2
LPAR3
GAPDH
GAS6
GH1
SGSM3
ANG
LYPD5
GTF2H2
HMGA1
ID1
ID4
INHA
MIR152
SMAD2
SMAD3
VN1R17P
MIR331
MTR
MYH6
NOS2
PNP
PRDX1
PAK1
ADIPOR1
DCTN4
LEF1
HSD17B7
UGT1A1
MED1
PPP5C
IMPACT
NLRP2
PRKCA
PRKCB
PKN1
TDRD1
KLK10
PSAP
MIR193B
CXCL16
CXCL5
SIAH2
SLPI
SMARCA4
SOAT1
STK11
TAC1
TGFBR1
TXN
FZD4
SPHK1
XPR1
CD163
PAGE4
AKAP12
NCOR2
ZEB2
SPRY2
HPSE
FLT1
ALOX15B
SH2B1
ANXA5
HLA-A
MIR20A
COX1
NTRK1
PGK1
PLAT
LGR6
TFF1
BTG2
CALM1
CALM2
CALM3
LINC01672
COMMD3-BMI1
CDK9
CDKN3
DLC1
FST
CEACAM5
SEMA3C
IFI44
TXNIP
SUB1
CHKA
CHRM3
H3P33
ADCYAP1
MRGPRX3
MRGPRX4
PRAP1
GPR151
OR51E1
VCAN
PDIK1L
CYP2D6
DAB2
DCN
DDIT3
DDX5
E2F5
ABCA1
EEF1A1
PRSS55
ALB
ALKBH3
ZHX2
FKBP5
FLI1
FLNA
ALPP
MRGPRX1
PDCD4
GPC1
UTS2R
ANGPT1
ANGPT2
GPER1
GRN
CERS2
H2AZ1
HLA-DRB1
HMMR
HNF4A
HNRNPK
APOE
ITGAV
KCNH2
KLK1
LDLR
LEPR
MIR126
MIR130B
MIR139
MIR150
MIR154
MIR155
MIR214
MIR223
MIR26B
MIR29B1
MIR29B2
MIR93
CD46
MDK
ABCC1
GPR166P
NPY
NOTCH3
NPAS2
MIR378A
ANO7
PAX2
PECAM1
PLA2G2A
IL17D
TRPM7
TUG1
PPT1
KDM3A
PRLR
PTK6
RASGRF1
REST
BLM
SET
SOD1
SOS1
SRY
SSTR2
BTF3P11
THY1
NR1H2
XRCC3
WDR77
NOX5
TFPI2
DHDDS
HMGA2
MLRL
USP9X
CAPZB
CASP1
RECK
PROK1
HAVCR2
SOCS1
BECN1
TRIM24
SOCS2
CCNB1
SLC16A4
SLC16A3
ABCG2
CDC25C
PIM2
LOC110806263
CTSK
ERCC1
FER
MMRN1
SRRM2
RBMS3
HK2
HP
HYAL1
LRP1
PNO1
PTBP1
PTGS1
CA9
CASP7
NR0B2
MAK16
IRS2
ARHGEF7
TSPY10
HOTTIP
TNK2
PCAT14
PAK4
PRMT5
OLFM4
CXCL13
CFL1
CFTR
LYVE1
TMED10
WWP1
FSTL1
CISH
ANIB1
CNR1
CPT1A
CSF1R
PWAR1
CTSZ
CYP1A2
CYP11A1
PRUNE2
CYP27A1
DSPP
ECE1
A2M
CRYBG1
ENG
EPO
ESRRA
FABP4
ACSL3
FAP
FGF13
FHL2
ELL2
KDM4B
XRCC6
TNFAIP8
NOC2L
GBX2
AMELX
GDF2
FOXP1
AGO2
GLO1
GLS
CXCR3
CTBP1-AS
GIT1
NOB1
GSN
HADHB
HDAC2
ANXA6
HIC1
ACACA
HOXC8
HPRT1
HSPD1
HSPG2
IL7
AQP3
IL17A
ITGB1
KIT
KIF22
KPNA2
LDHA
LGALS8
MIRLET7B
MIR132
MIR148A
MIR16-1
MIR191
MIR199A1
MIR199A2
MIR19A
MIR200A
MIR206
MIR22
MIR23A
MIR27B
MIR32
MIR320A
MIR99A
ARRB2
MCM7
MECP2
MMP16
KLK12
MST1R
NFATC1
NPM1
MIR424
OSM
P2RX7
PA2G4
SLC45A2
NUSAP1
MZB1
TNFRSF12A
SCARA3
MPC1
PKD1
POLB
ING3
PPARD
XAF1
LGR4
PBK
MAP2K5
LGMN
MIR499A
PTPN1
WFDC1
RAC3
RAP1A
RBM3
SNORD15A
MBOAT4
RPS6KB1
CEACAM1
SELE
SFRP4
SIM2
UCA1
SOD3
SPG7
SREBF2
SSTR1
ADAM17
TEP1
TFPI
TGM2
TSPO
TLR1
TP53BP1
CRISP2
TSG101
TSPY1
TSPY3
UBE3A
TRPV1
WNT11
ZFP36
SLC52A2
LIN28A
FOSL1
SETD7
KDM5D
SESN2
MIEN1
PRAC1
SRRM4
SNORD35B
SPZ1
SLC43A1
SNORD14B
SNORD14C
SNORD14D
SNORD14E
PIAS1
PDLIM4
CDK5R1
CCNA1
RGN
ARHGEF2
NOG
CLOCK
CD40LG
MTSS1
MIR708
MIR466
SPRY1
DCC
FGF1
PHLPP1
FTH1
GNAS
ICA1
MIR107
MIR130A
SCD
TGFB3
SLC7A5
CD40
AKT3
MIR888
MIR1301
PARP2
MIR2909
HUWE1
LINC-ROR
PGR-AS1
TRAP1
RBM5
ADAM10
TRIM13
CDK7
TRIB1
CDK8
CDKN2B
LANCL1
AKR1A1
TUBB3
CAP1
CARM1
CEBPB
GNA13
POLD3
PTGES3
PLAC1
LILRB1
SMR3B
GADD45G
PRDX3
WDR5
RPP14
ZWINT
CDC37
PTP4A3
CHI3L1
LINC02605
CBX3
H3P8
H3P17
ARL11
AGAP2
DCD
H4-16
CCR4
CCR6
COMP
MAP3K8
COX8A
CLDN4
CPOX
CPT2
CRAT
ATF2
ZBTB46
NKX2-5
CXADR
SLC2A12
DAPK3
DDC
TMPRSS6
AGER
DPEP1
DPP4
HBEGF
EPHA2
CADM4
EPAS1
EPHB4
ETV6
ALCAM
F2RL1
SPATA19
ALDH1A3
EFEMP1
FDPS
TPX2
FOXC2
KDM4C
PHF8
PPP1R13B
CBX5
ALPI
ABL1
FUS
FUT4
RICTOR
FYN
GNL3
NUPR1
LATS2
GDNF
GFI1
GHRHR
GHSR
NOX1
PELP1
BIN1
CAVIN1
TMED10P1
TRIM59
LAMTOR2
MYLIP
RACGAP1
UHRF1
OBP2A
H1-0
H2AX
HDGF
HIP1
HMGCR
NR4A1
FOXA2
HOXA10
HOXA13
HES1
HSD17B2
HSD17B4
HSF1
TNC
IAPP
IFNA1
IFNA13
IL2RA
IL2RB
IL13
IDO1
ITGA6
ISG20
ITGA5
ITK
KCNMA1
KISS1
KMT5A
KRT19
RND3
LAMB3
LAMP2
RPSA
LASP1
LGALS3BP
LIG4
LIMK1
LMO2
FENDRR
LPA
LRP5
ARNT
MIR125A
MIR137
MIR192
MIR198
ARR3
MIR30A
MIR33A
MIR17HG
SMAD1
MAGEA3
MAZ
MEIS1
MEIS2
MIAT
MIR330
MIR335
MT1A
ATP6
PPP1R12A
NCAM1
DRG1
NEDD4
NF2
NHS
NTRK2
MIR361
MIR381
MIR425
OLR1
ALDH7A1
PBX1
PCBP1
NDUFA13
ABHD5
ING4
LINC00328
ERGIC2
PDGFRA
SF3B6
ENPP1
PER1
PFKFB4
PGF
SERPINB5
PIP
PITX1
PKD3
PLA2G4A
SERPINF2
PLXNB1
PMAIP1
XRN1
UGT2B28
DDX56
PPP1R12C
ANO1
TRIM68
PPP2CA
FBXW7
MEG3
H4C15
CAMK2N1
HES6
TRIM36
PRG2
PRKAR1A
MYDGF
MAPK9
KLK6
PLAAT1
PSMD7
DANCR
PTH
MIR452
MIR409
MIR146B
MIR500A
GATAD2B
KIDINS220
QSOX1
PTPN7
SUGP1
HAMP
CCDC181
ZNF410
PTPRF
PYCR1
RAN
RARA
BCL2L1
RING1
BRD2
RPL19
MIR483
MIR455
RRAD
RREB1
RRM2
SORT1
S100A6
TP53AIP1
GOLPH3
SFRP5
CXCR5
TTTY15
SHH
SHOX2
SMYD3
BMP4
CXADRP1
FSCN1
SQLE
SRM
SRPK1
SSTR5
ST13
STC1
STIM1
SYP
HNF1A
TCF3
MIR574
MIR615
BTK
TEAD1
TEK
TERF2
TFAP2A
TFRC
THBS2
TOP2B
TRAF2
TRPM2
TRPS1
SSX2B
TXNRD1
TYR
VPS51
VCL
VIPR1
VTN
NSD2
WNT1
XRCC4
ZNF217
PRDM2
FZD5
FTO
CAMKMT
CMIP
DIAPH3
TLR10
CAPG
CAPN2
H4C9
AXIN2
FZD8
NUF2
H4C1
SOX7
H4C4
H4C6
H4C12
H4C11
H4C3
H4C2
H4C5
H4C13
H4C14
ITCH
PLA2G6
CCDC8
PLA2G10
SPARCL1
MAGT1
KAT8
TCHP
[truncated: 2,663 more rows]
